# Supplementary material for: Genetic Ablation and Multi-Omics Profiling Reveal CEP55 as a Key Driver of Tumorigenesis in Diverse Cancer Models
Source: Research Square preprint supplement (doi:10.21203/rs.3.rs-8060108/v1), 2025-11-28
Supplement: Supplementary file 1 [file 6c772f407b147909bd7f9831.xlsx]

## Sheet: Sheet1
Number	Pathways_1_TCGA	MEF_IMM_UP	General process		Number	Pathways_1_TCGA	MEF_IMM_DOWN	General process		Number	Pathways_1_TCGA	MEF_IMM_PHOSPHO_UP	General process		Number	Pathways_1_TCGA	MEF_IMM_PHOSPHO_DOWN	General process			Number	Pathways_1_TCGA	MEF_E1A_RAS_UP	General process		Number	Pathways_1_TCGA	MEF_E1A_RAS_DOWN	General process		Number	Pathways_1_TCGA	MEF_E1A_RAS_PHOSPHO_UP	General process		Number	Pathways_1_TCGA	MEF_E1A_RAS_PHOSPHO_DOWN	General process			Number	Pathways_1_TCGA	mRNA_ALL_PTENKO_to_PTENKO_CEP55KO_UP	General process		Number	Pathways_1_TCGA	mRNA_ALL_PTENKO_to_PTENKO_CEP55KO_DOWN
924	hypoxia and p53 in the cardiovascular system	Cellular responses to stress	Hypoxia		240	tumor suppressor arf inhibits ribosomal biogenesis	Major pathway of rRNA processing in the nucleolus and cytosol	Ribosome		891	Processing of Capped Intron-Containing Pre-mRNA	Processing of Capped Intron-Containing Pre-mRNA	Ribosome		240	tumor suppressor arf inhibits ribosomal biogenesis	Major pathway of rRNA processing in the nucleolus and cytosol	Ribosome			827	Respiratory electron transport	Respiratory electron transport	Metabolism		1159	Response to elevated platelet cytosolic Ca2	Response to elevated platelet cytosolic Ca2+	Adhesion		358	Processing of Intronless Pre-mRNAs	Processing of Capped Intron-Containing Pre-mRNA	Ribosome		891	Processing of Capped Intron-Containing Pre-mRNA	Processing of Capped Intron-Containing Pre-mRNA	Ribosome			306	MyD88 dependent cascade initiated on endosome	MyD88 dependent cascade initiated on endosome	Trafficking/Signaling		970	Assembly of collagen fibrils and other multimeric structures	Assembly of collagen fibrils and other multimeric structures
818	Hypoxic and oxygen homeostasis regulation of HIF-1-alpha	Cellular responses to stress	Hypoxia		1242	L13a-mediated translational silencing of Ceruloplasmin expression	L13a-mediated translational silencing of Ceruloplasmin expression	Ribosome		893	U2 Dependent Splicing	mRNA Splicing	Ribosome		894	mRNA 3 -end processing	rRNA processing	Ribosome			1201	Mitotic Prometaphase	Mitotic Prometaphase	Cell Cycle		1157	Platelet degranulation	Platelet degranulation	Adhesion		895	mRNA Splicing - Minor Pathway	mRNA Splicing	Ribosome		895	mRNA Splicing - Minor Pathway	mRNA Splicing	Ribosome			305	TRAF6 mediated induction of NFkB and MAP kinases upon TLR7/8 or 9 activation	TRAF6 mediated induction of NFkB and MAP kinases upon TLR7/8 or 9 activation	Immunity		969	Collagen biosynthesis and modifying enzymes	Collagen biosynthesis and modifying enzymes
915	Mitotic Metaphase/Anaphase Transition	Mitotic Metaphase and Anaphase	Cell Cycle		891	Processing of Capped Intron-Containing Pre-mRNA	Processing of Capped Intron-Containing Pre-mRNA	Ribosome		309	cell cycle g1/s check point	Cell Cycle Checkpoints	Cell Cycle		891	Processing of Capped Intron-Containing Pre-mRNA	Processing of Capped Intron-Containing Pre-mRNA	Ribosome			596	Nonsense Mediated Decay Independent of the Exon Junction Complex	Nonsense Mediated Decay (NMD) enhanced by the Exon Junction Complex (EJC)	Ribosome		196	Signaling by PDGF	Signaling by Receptor Tyrosine Kinases	Trafficking/Signaling		893	U2 Dependent Splicing	mRNA Splicing	Ribosome		575	Epidermal Growth Factor Receptor EGFR signaling	Signaling by Receptor Tyrosine Kinases	Trafficking/Signaling			1342	Smooth Muscle Contraction	Smooth Muscle Contraction	Trafficking/Signaling		505	Integrin cell surface interactions	Integrin cell surface interactions
309	cell cycle g1/s check point	Cell Cycle Checkpoints	Cell Cycle		1169	GTP hydrolysis and joining of the 60S ribosomal subunit	GTP hydrolysis and joining of the 60S ribosomal subunit	Ribosome		592	sonic hedgehog receptor ptc1 regulates cell cycle	Cell Cycle Checkpoints	Cell Cycle		1169	GTP hydrolysis and joining of the 60S ribosomal subunit	GTP hydrolysis and joining of the 60S ribosomal subunit	Ribosome			684	Nonsense Mediated Decay Enhanced by the Exon Junction Complex	Nonsense Mediated Decay (NMD) enhanced by the Exon Junction Complex (EJC)	Ribosome		1057	Signaling by constitutively active EGFR	Signaling by Receptor Tyrosine Kinases			240	tumor suppressor arf inhibits ribosomal biogenesis	Major pathway of rRNA processing in the nucleolus and cytosol	Ribosome		1037	rho-selective guanine exchange factor akap13 mediates stress fiber formation	Cellular responses to stress	Hypoxia			847	Toll Like Receptor 10 (TLR10) Cascade	Toll Like Receptor 10 (TLR10) Cascade	Immunity		902	NCAM1 interactions	NCAM1 interactions
918	Separation of Sister Chromatids	Separation of Sister Chromatids	Cell Cycle		1172	Formation of a pool of free 40S subunits	Formation of a pool of free 40S subunits	Formation of		617	pten dependent cell cycle arrest and apoptosis	Cell Cycle Checkpoints	Cell Cycle		895	mRNA Splicing - Minor Pathway	mRNA Splicing	Ribosome			263	Cholesterol biosynthesis	Cholesterol biosynthesis	Metabolism		1223	Asparagine N-linked glycosylation	Asparagine N-linked glycosylation	Metabolism		364	Transport of the SLBP Dependant Mature mRNA	Transport of Mature Transcript to Cytoplasm	Ribosome		124	Transcriptional Regulation of White Adipocyte Differentiation	Transcriptional Regulation by TP53	DNA			852	MyD88 cascade initiated on plasma membrane	MyD88 cascade initiated on plasma membrane	Trafficking/Signaling		903	NCAM signaling for neurite out-growth	NCAM signaling for neurite out-growth
120	HIF-2-alpha transcription factor network	Cellular response to chemical stress	Hypoxia		684	Nonsense Mediated Decay Enhanced by the Exon Junction Complex	Nonsense Mediated Decay (NMD) enhanced by the Exon Junction Complex (EJC)	Ribosome		50	Apoptotic cleavage of cellular proteins	Apoptotic cleavage of cellular proteins	Apoptotic		1242	L13a-mediated translational silencing of Ceruloplasmin expression	L13a-mediated translational silencing of Ceruloplasmin expression	Ribosome			1037	rho-selective guanine exchange factor akap13 mediates stress fiber formation	Cellular responses to stress	Hypoxia		1244	PLC-mediated hydrolysis of PIP2	Effects of PIP2 hydrolysis	Trafficking/Signaling		896	Transport of Mature mRNA derived from an Intron-Containing Transcript	Transport of Mature Transcript to Cytoplasm	Ribosome		97	E2F transcription factor network	Transcriptional Regulation by TP53	DNA			1385	Toll Like Receptor TLR6:TLR2 Cascade	Toll Like Receptor TLR6:TLR2 Cascade	Immunity		196	Signaling by PDGF	Signaling by PDGF
1281	cell cycle g2/m checkpoint	G2/M Checkpoints	Cell Cycle		596	Nonsense Mediated Decay Independent of the Exon Junction Complex	Nonsense Mediated Decay (NMD) independent of the Exon Junction Complex (EJC)	Ribosome		1037	rho-selective guanine exchange factor akap13 mediates stress fiber formation	Cellular responses to stress	Hypoxia		1172	Formation of a pool of free 40S subunits	Formation of a pool of free 40S subunits	Ribosome			51	Apoptotic execution phase	Apoptotic execution phase	Apoptotic		825	VEGFR3 signaling in lymphatic endothelium	Signaling by VEGF	Adhesion		987	Transport of the SLBP independent Mature mRNA	Transport of Mature Transcript to Cytoplasm	Ribosome		825	VEGFR3 signaling in lymphatic endothelium	Signaling by VEGF	Trafficking/Signaling			345	DAP12 interactions	DAP12 interactions	Trafficking/Signaling		1073	Platelet Adhesion to exposed collagen	Platelet Adhesion to exposed collagen
34	Canonical Wnt signaling pathway	Signaling by WNT	WNT		1264	SRP-dependent cotranslational protein targeting to membrane	SRP-dependent cotranslational protein targeting to membrane	Ribosome		1202	Resolution of Sister Chromatid Cohesion	Resolution of Sister Chromatid Cohesion	DNA		1264	SRP-dependent cotranslational protein targeting to membrane	SRP-dependent cotranslational protein targeting to membrane	Ribosome			674	gata3 participate in activating the th2 cytokine genes expression	Cytokine Signaling in Immune system	Immunity		950	vegf hypoxia and angiogenesis	Signaling by VEGF	Adhesion		988	Transport of Mature mRNA Derived from an Intronless Transcript	Transport of Mature Transcript to Cytoplasm	Ribosome		240	tumor suppressor arf inhibits ribosomal biogenesis	Major pathway of rRNA processing in the nucleolus and cytosol	Ribosome			1027	MAP kinase activation	MAP kinase activation	Trafficking/Signaling		964	Molecules associated with elastic fibres	Molecules associated with elastic fibres
1336	Noncanonical Wnt signaling pathway	Signaling by WNT	WNT		895	mRNA Splicing - Minor Pathway	mRNA Splicing	Ribosome		51	Apoptotic execution phase	Apoptotic execution phase	Apoptotic		596	Nonsense Mediated Decay Independent of the Exon Junction Complex	Nonsense Mediated Decay (NMD) independent of the Exon Junction Complex (EJC)	Ribosome			1102	Recruitment of NuMA to mitotic centrosomes	Recruitment of NuMA to mitotic centrosomes	Cell Cycle		368	Glycolysis	Glycolysis	Metabolism		309	cell cycle g1/s check point	Cell Cycle Checkpoints	Cell Cycle		1213	PIP3 activates AKT signaling	PIP3 activates AKT signaling	Trafficking/Signaling			777	RNA Polymerase II Pre-transcription Events	RNA Polymerase II Pre-transcription Events	DNA		367	GP1b-IX-V activation signalling	GP1b-IX-V activation signalling
717	Wnt signaling network	Signaling by WNT	WNT		1171	Translation initiation complex formation	Translation initiation complex formation	Ribosome		117	Amplification of signal from unattached kinetochores via a MAD2 inhibitory signal	Amplification of signal from the kinetochores	Cell Cycle		684	Nonsense Mediated Decay Enhanced by the Exon Junction Complex	Nonsense Mediated Decay (NMD) enhanced by the Exon Junction Complex (EJC)	Ribosome			1057	Signaling by constitutively active EGFR	Signaling by Receptor Tyrosine Kinases	Trafficking/Signaling		1342	Smooth Muscle Contraction	Smooth Muscle Contraction	Trafficking/Signaling		617	pten dependent cell cycle arrest and apoptosis	Cell Cycle Checkpoints	Cell Cycle		784	Factors involved in megakaryocyte development and platelet production	Factors involved in megakaryocyte development and platelet production	Adhesion			1144	Downstream TCR signaling	Downstream TCR signaling	Trafficking/Signaling		968	Crosslinking of collagen fibrils	Crosslinking of collagen fibrils
946	wnt signaling pathway	Signaling by WNT	WNT		1170	Activation of the mRNA upon binding of the cap-binding complex and eIFs and subsequent binding to 43S	Activation of the mRNA upon binding of the cap-binding complex and eIFs, and subsequent binding to 43S	Ribosome		1201	Mitotic Prometaphase	Mitotic Prometaphase	Cell Cycle		762	Gap-filling DNA repair synthesis and ligation in TC-NER	Gap-filling DNA repair synthesis and ligation in TC-NER	DNA			596	Nonsense Mediated Decay Independent of the Exon Junction Complex	Nonsense Mediated Decay (NMD) independent of the Exon Junction Complex (EJC)	Ribosome		782	PECAM1 interactions	PECAM1 interactions	Adhesion		1037	rho-selective guanine exchange factor akap13 mediates stress fiber formation	Cellular responses to stress	Hypoxia		309	cell cycle g1/s check point	Cell Cycle Checkpoints	Cell Cycle			775	RNA Polymerase II Transcription Pre-Initiation And Promoter Opening	RNA Polymerase II Transcription Pre-Initiation And Promoter Opening	DNA		966	Elastic fibre formation	Elastic fibre formation
1291	DNA replication initiation	DNA Replication	DNA		1168	Ribosomal scanning and start codon recognition	Ribosomal scanning and start codon recognition	Ribosome		138	role of ran in mitotic spindle regulation	Mitotic Spindle Checkpoint	Cell Cycle		794	Sema3A PAK dependent Axon repulsion	Sema3A PAK dependent Axon repulsion	Trafficking/Signaling			1100	Recruitment of mitotic centrosome proteins and complexes	Recruitment of mitotic centrosome proteins and complexes	Cell Cycle		990	GRB2:SOS provides linkage to MAPK signaling for Integrins	GRB2:SOS provides linkage to MAPK signaling for Integrins	Adhesion		124	Transcriptional Regulation of White Adipocyte Differentiation	Transcriptional Regulation by TP53	DNA		592	sonic hedgehog receptor ptc1 regulates cell cycle	Cell Cycle Checkpoints	Cell Cycle			776	RNA Polymerase II Transcription Initiation And Promoter Clearance	RNA Polymerase II Transcription Initiation And Promoter Clearance	DNA		614	p53-Dependent G1 DNA Damage Response	p53-Dependent G1 DNA Damage Response
1223	Asparagine N-linked glycosylation	Asparagine N-linked glycosylation	Metabolism		1173	Formation of the ternary complex and subsequently the 43S complex	Formation of the ternary complex, and subsequently, the 43S complex	Ribosome		1263	Eukaryotic Translation Elongation	Eukaryotic Translation Initiation	Ribosome		620	S6K1-mediated signalling	mTORC1-mediated signalling	Amino Acids			1101	Loss of proteins required for interphase microtubule organization from the centrosome	Loss of proteins required for interphase microtubule organization from the centrosome	Cell Cycle		708	a6b1 and a6b4 Integrin signaling	Integrin signaling	Adhesion		1349	basic mechanisms of sumoylation	SUMOylation of DNA damage response and repair proteins	Nucleus		617	pten dependent cell cycle arrest and apoptosis	Cell Cycle Checkpoints	Cell Cycle			780	RNA Polymerase II Transcription Initiation	RNA Polymerase II Transcription Initiation	DNA		354	GPVI-mediated activation cascade	GPVI-mediated activation cascade
1199	Clearance of Nuclear Envelope Membranes from Chromatin	Nuclear Envelope (NE) Reassembly	Nuclear		918	Separation of Sister Chromatids	Separation of Sister Chromatids	DNA		918	Separation of Sister Chromatids	Separation of Sister Chromatids	DNA		621	S6K1 signalling	mTORC1-mediated signalling	Amino Acids			1349	basic mechanisms of sumoylation	SUMOylation of DNA damage response and repair proteins	Nuclear		716	amb2 Integrin signaling	Integrin signaling	Adhesion		1201	Mitotic Prometaphase	Mitotic Prometaphase	DNA		665	CDC42 signaling events	CDC42 GTPase cycle	Trafficking/Signaling			781	RNA Polymerase II Promoter Escape	RNA Polymerase II Promoter Escape	DNA		848	Trafficking and processing of endosomal TLR	Trafficking and processing of endosomal TLR
1281	cell cycle g2/m checkpoint	G2/M Transition	Cell Cycle		597	snRNP Assembly	snRNP Assembly	Ribosome		417	Deadenylation of mRNA	Deadenylation of mRNA	Ribosome		417	Deadenylation of mRNA	Deadenylation of mRNA	Ribosome			1264	SRP-dependent cotranslational protein targeting to membrane	SRP-dependent cotranslational protein targeting to membrane	Ribosome		998	a4b7 Integrin signaling	Integrin signaling	Adhesion		918	Separation of Sister Chromatids	Separation of Sister Chromatids	DNA		192	aspirin blocks signaling pathway involved in platelet activation	Platelet activation, signaling and aggregation	Adhesion			1185	ABC-family proteins mediated transport	ABC-family proteins mediated transport	Trafficking/Signaling		612	Stabilization of p53	Stabilization of p53
503	Beta-catenin phosphorylation cascade	Beta-catenin independent WNT signaling	Cell Cycle		818	Hypoxic and oxygen homeostasis regulation of HIF-1-alpha	Cellular response to chemical stress	Hypoxia		1168	Ribosomal scanning and start codon recognition	Ribosomal scanning and start codon recognition	Ribosome		233	PLC beta mediated events	PLC beta mediated events	Trafficking/Signaling			784	Factors involved in megakaryocyte development and platelet production	Factors involved in megakaryocyte development and platelet production	Adhesion		1155	p130Cas linkage to MAPK signaling for integrins	p130Cas linkage to MAPK signaling for integrins	Trafficking/Signaling		1349	basic mechanisms of sumoylation	SUMOylation of RNA binding proteins	Nucleus		818	Hypoxic and oxygen homeostasis regulation of HIF-1-alpha	Cellular response to heat stress	Hypoxia			1325	Synthesis of PIPs at the plasma membrane	Synthesis of PIPs at the plasma membrane	Trafficking/Signaling		362	Metabolism of polyamines	Metabolism of polyamines
272	Metabolism of folate and pterines	Metabolism of amino acids and derivatives	Amino Acids		753	Amino acid transport across the plasma membrane	Amino acid metabolism	Amino Acids		1171	Translation initiation complex formation	Translation initiation complex formation	Ribosome		77	Signaling events mediated by HDAC Class I	SUMOylation of RNA binding proteins	Nuclear			891	Processing of Capped Intron-Containing Pre-mRNA	Processing of Capped Intron-Containing Pre-mRNA	Ribosome		637	Transport to the Golgi and subsequent modification	Transport to the Golgi and subsequent modification	Trafficking/Signaling		1327	Regulation of PAK-2p34 activity by PS-GAP/RHG10	Regulation of TP53 Activity	Trafficking/Signaling		924	hypoxia and p53 in the cardiovascular system	Cellular response to heat stress	Hypoxia			504	Degradation of beta-catenin by the destruction complex	Degradation of beta-catenin by the destruction complex	Trafficking/Signaling		361	Creatine metabolism	Creatine metabolism
969	Collagen biosynthesis and modifying enzymes	Collagen formation	Adhesion		674	gata3 participate in activating the th2 cytokine genes expression	Cytokine Signaling in Immune system	Immunity		1170	Activation of the mRNA upon binding of the cap-binding complex and eIFs and subsequent binding to 43S	Activation of the mRNA upon binding of the cap-binding complex and eIFs, and subsequent binding to 43S	Ribosome		577	Formation of RNA Pol II elongation complex	Formation of RNA Pol II elongation complex	Ribosome			411	ATM mediated response to DNA double-strand break	DNA Double-Strand Break Repair	DNA		90	TGF-beta receptor signaling in EMT epithelial to mesenchymal transition	Signaling by TGF-beta Receptor Complex	Adhesion		387	srebp control of lipid synthesis	Regulation of TP53 Activity	Trafficking/Signaling		50	Apoptotic cleavage of cellular proteins	Apoptotic cleavage of cellular proteins	Apoptotic			738	ERKs are inactivated	ERKs are inactivated	Trafficking/Signaling		504	Degradation of beta-catenin by the destruction complex	Degradation of beta-catenin by the destruction complex
593	Nuclear Receptor transcription pathway	Nuclear events mediated by NFE2L2	Nuclear		617	pten dependent cell cycle arrest and apoptosis	Cell Cycle Checkpoints	Cell Cycle		1169	GTP hydrolysis and joining of the 60S ribosomal subunit	GTP hydrolysis and joining of the 60S ribosomal subunit	Ribosome		764	Formation of transcription-coupled NER TC-NER repair complex	Formation of TC-NER Pre-Incision Complex	Ribosome			739	CREB phosphorylation	CREB phosphorylation	Trafficking/Signaling		644	TGF-beta receptor signaling	Signaling by TGFB family members	Adhesion		1202	Resolution of Sister Chromatid Cohesion	Resolution of Sister Chromatid Cohesion	DNA		51	Apoptotic execution phase	Apoptotic execution phase	Apoptotic			593	Nuclear Receptor transcription pathway	Nuclear Receptor transcription pathway	DNA		827	Respiratory electron transport	Respiratory electron transport
1201	Mitotic Prometaphase	Mitotic Prometaphase	Mitotic		309	cell cycle g1/s check point	Cell Cycle Checkpoints	Cell Cycle		90	TGF-beta receptor signaling in EMT epithelial to mesenchymal transition	Signaling by TGF-beta Receptor Complex	Trafficking/Signaling		779	RNA Polymerase II Transcription Elongation	RNA Polymerase II Transcription Elongation	Ribosome			1349	basic mechanisms of sumoylation	SUMOylation of transcription factors	Nuclear		674	gata3 participate in activating the th2 cytokine genes expression	Cytokine Signaling in Immune system	Immunity		138	role of ran in mitotic spindle regulation	Mitotic Spindle Checkpoint	Cell Cycle		674	gata3 participate in activating the th2 cytokine genes expression	Cytokine Signaling in Immune system	Immunity			1152	Effects of PIP2 hydrolysis	Effects of PIP2 hydrolysis	Metabolism		1144	Downstream TCR signaling	Downstream TCR signaling
58	L1CAM interactions	L1CAM interactions	Adhesion		97	E2F transcription factor network	Transcriptional Regulation by TP53	DNA		644	TGF-beta receptor signaling	Signaling by TGF-beta Receptor Complex	Trafficking/Signaling		1316	hop pathway in cardiac development	HSP90 chaperone cycle for steroid hormone receptors (SHR) in the presence of ligand	Trafficking/Signaling			272	Metabolism of folate and pterines	Metabolism of amino acids and derivatives	Amino Acids		712	S1P3 pathway	RHO GTPases Activate Formins	Trafficking/Signaling		120	HIF-2-alpha transcription factor network	Cellular response to heat stress	Hypoxia		506	Hippo signaling cascade	Signaling by Hippo	Trafficking/Signaling			344	DAP12 signaling	DAP12 signaling	Trafficking/Signaling		962	Activation of Matrix Metalloproteinases	Activation of Matrix Metalloproteinases
138	role of ran in mitotic spindle regulation	Mitotic G1 phase and G1/S transition	Cell Cycle		896	Transport of Mature mRNA derived from an Intron-Containing Transcript	Transport of Mature mRNA derived from an Intron-Containing Transcript	Ribosome		401	Activation of ATR in response to replication stress	Activation of ATR in response to replication stress	Cell Cycle		1101	Loss of proteins required for interphase microtubule organization from the centrosome	Loss of proteins required for interphase microtubule organization from the centrosome	Cell Cycle			362	Metabolism of polyamines	Metabolism of amino acids and derivatives	Amino Acids		355	Platelet Aggregation Plug Formation	Platelet Aggregation (Plug Formation)	Adhesion		818	Hypoxic and oxygen homeostasis regulation of HIF-1-alpha	Cellular response to heat stress	Hypoxia		988	Transport of Mature mRNA Derived from an Intronless Transcript	Transport of Mature Transcript to Cytoplasm	Ribosome			905	Netrin-1 signaling	Netrin-1 signaling	Adhesion		613	Autodegradation of the E3 ubiquitin ligase COP1	Autodegradation of the E3 ubiquitin ligase COP1
1291	DNA replication initiation	DNA Replication Pre-Initiation	DNA		689	Destabilization of mRNA by AUF1 hnRNP D0	AUF1 (hnRNP D0) binds and destabilizes mRNA	Ribosome		1329	Caspase-mediated cleavage of cytoskeletal proteins	Caspase-mediated cleavage of cytoskeletal proteins	Apoptotic		1197	Loss of Nlp from mitotic centrosomes	Loss of Nlp from mitotic centrosomes	Cell Cycle			1099	Regulation of PLK1 Activity at G2/M Transition	Regulation of PLK1 Activity at G2/M Transition	Cell Cycle		181	Beta oxidation of decanoyl-CoA to octanoyl-CoA-CoA	Biological oxidations	Metabolism		924	hypoxia and p53 in the cardiovascular system	Cellular response to heat stress	Hypoxia		785	Kinesins	Kinesins	Cell Cycle			1082	Interleukin-1 signaling	Interleukin-1 signaling	Immunity		403	Ubiquitin Mediated Degradation of Phosphorylated Cdc25A	Ubiquitin Mediated Degradation of Phosphorylated Cdc25A
1202	Resolution of Sister Chromatid Cohesion	Resolution of Sister Chromatid Cohesion	DNA		1213	PIP3 activates AKT signaling	PIP3 activates AKT signaling	Trafficking/Signaling		1223	Asparagine N-linked glycosylation	Asparagine N-linked glycosylation	Metabolism		1277	Resolution of AP sites via the single-nucleotide replacement pathway	Resolution of AP sites via the single-nucleotide replacement pathway	DNA			1081	Toll Like Receptor 4 (TLR4) Cascade	Toll Like Receptor 4 (TLR4) Cascade	Immunity		182	Beta oxidation of octanoyl-CoA to hexanoyl-CoA	Biological oxidations	Metabolism		988	Transport of Mature mRNA Derived from an Intronless Transcript	Transport of Mature mRNA Derived from an Intronless Transcript	Ribosome		717	Wnt signaling network	Signaling by WNT	WNT			737	ERK/MAPK targets	ERK/MAPK targets	Trafficking/Signaling		402	p53-Independent DNA Damage Response	p53-Independent DNA Damage Response
1317	Downstream signaling in na ve CD8 T cells	Downstream signaling events of B Cell Receptor (BCR)	Immunity		1317	Downstream signaling in na ve CD8 T cells	Downstream signaling events of B Cell Receptor (BCR)	Immunity		818	Hypoxic and oxygen homeostasis regulation of HIF-1-alpha	Cellular response to heat stress	Hypoxia		736	Aurora A signaling	AURKA Activation by TPX2	Trafficking/Signaling			242	TRAF6 mediated IRF7 activation in TLR7/8 or 9 signaling	Toll-like Receptor Cascades	Immunity		183	Beta oxidation of hexanoyl-CoA to butanoyl-CoA	Biological oxidations	Metabolism		1349	basic mechanisms of sumoylation	SUMOylation of DNA replication proteins	Nucleus		946	wnt signaling pathway	Signaling by WNT	WNT			354	GPVI-mediated activation cascade	GPVI-mediated activation cascade	Trafficking/Signaling		791	Other semaphorin interactions	Other semaphorin interactions
567	MHC class II antigen presentation	MHC class II antigen presentation	Immunity		1199	Clearance of Nuclear Envelope Membranes from Chromatin	Nuclear Envelope (NE) Reassembly	Nuclear		924	hypoxia and p53 in the cardiovascular system	Cellular response to heat stress	Hypoxia		329	Opioid Signalling	Opioid Signalling	Trafficking/Signaling			1157	Platelet degranulation	Platelet degranulation	Adhesion		184	Beta oxidation of butanoyl-CoA to acetyl-CoA	Biological oxidations	Metabolism		1199	Clearance of Nuclear Envelope Membranes from Chromatin	Nuclear Envelope Breakdown	Nucleus		918	Separation of Sister Chromatids	Separation of Sister Chromatids	DNA			58	L1CAM interactions	L1CAM interactions	Adhesion		1043	Autodegradation of Cdh1 by Cdh1:APC/C	Autodegradation of Cdh1 by Cdh1:APC/C
1138	Hedgehog signaling events mediated by Gli proteins	Hedgehog 'off' state	Differentiation		504	Degradation of beta-catenin by the destruction complex	Degradation of beta-catenin by the destruction complex	WNT		1349	basic mechanisms of sumoylation	SUMOylation of DNA replication proteins	Nuclear		416	Recruitment of repair and signaling proteins to double-strand breaks	Recruitment of mitotic centrosome proteins and complexes	Cell Cycle			1242	L13a-mediated translational silencing of Ceruloplasmin expression	L13a-mediated translational silencing of Ceruloplasmin expression	Ribosome		185	Beta oxidation of palmitoyl-CoA to myristoyl-CoA	Biological oxidations	Metabolism		775	RNA Polymerase II Transcription Pre-Initiation And Promoter Opening	RNA Polymerase II Pre-transcription Events	Ribosome		1201	Mitotic Prometaphase	Mitotic Prometaphase	Cell Cycle			1143	Generation of second messenger molecules	Generation of second messenger molecules	Trafficking/Signaling		1343	Oxygen-dependent proline hydroxylation of Hypoxia-inducible Factor Alpha	Oxygen-dependent proline hydroxylation of Hypoxia-inducible Factor Alpha
4	Ubiquitin-dependent degradation of Cyclin D1	Ubiquitin-dependent degradation of Cyclin D	Cell Cycle		362	Metabolism of polyamines	Metabolism of nucleotides	Metabolism		90	TGF-beta receptor signaling in EMT epithelial to mesenchymal transition	Signaling by TGFB family members	Trafficking/Signaling		1021	Localization of the PINCH-ILK-PARVIN complex to focal adhesions	Localization of the PINCH-ILK-PARVIN complex to focal adhesions	Adhesion			434	il-2 receptor beta chain in t cell activation	Signaling by Interleukins	Immunity		186	Beta oxidation of lauroyl-CoA to decanoyl-CoA-CoA	Biological oxidations	Metabolism		1114	hypoxia-inducible factor in the cardivascular system	Regulation of HSF1-mediated heat shock response	Hypoxia		1242	L13a-mediated translational silencing of Ceruloplasmin expression	L13a-mediated translational silencing of Ceruloplasmin expression	Ribosome			1089	Interferon gamma signaling	Interferon gamma signaling	Immunity		727	Metabolism of Angiotensinogen to Angiotensins	Metabolism of Angiotensinogen to Angiotensins
970	Assembly of collagen fibrils and other multimeric structures	Assembly of collagen fibrils and other multimeric structures	Adhesion		827	Respiratory electron transport	Respiratory electron transport, ATP synthesis by chemiosmotic coupling, and heat production by uncoupling proteins.	Metabolism		644	TGF-beta receptor signaling	Signaling by TGFB family members	Trafficking/Signaling		43	PKA activation in glucagon signalling	PKA activation in glucagon signalling	Trafficking/Signaling			1169	GTP hydrolysis and joining of the 60S ribosomal subunit	GTP hydrolysis and joining of the 60S ribosomal subunit	Ribosome		124	Transcriptional Regulation of White Adipocyte Differentiation	Transcriptional Regulation by TP53	DNA		117	Amplification of signal from unattached kinetochores via a MAD2 inhibitory signal	Amplification of signal from unattached kinetochores via a MAD2 inhibitory signal	Cell Cycle		1169	GTP hydrolysis and joining of the 60S ribosomal subunit	GTP hydrolysis and joining of the 60S ribosomal subunit	Ribosome			653	NRAGE signals death through JNK	NRAGE signals death through JNK	Apototic		1289	Orc1 removal from chromatin	Orc1 removal from chromatin
142	Degradation of beta catenin	Degradation of beta-catenin by the destruction complex	WNT		1082	Interleukin-1 signaling	Interleukin-1 signaling	Immunity		843	tgf beta signaling pathway	Signaling by TGFB family members	Trafficking/Signaling		443	Acyl chain remodeling of CL	Acyl chain remodeling of CL	Metaobolism			1159	Response to elevated platelet cytosolic Ca2	Response to elevated platelet cytosolic Ca2+	Adhesion		1231	Synthesis of Prostaglandins PG and Thromboxanes TX	Synthesis of Prostaglandins (PG) and Thromboxanes (TX)	Metabolism		987	Transport of the SLBP independent Mature mRNA	Transport of the SLBP independent Mature mRNA	Ribosome		297	Signaling by ERBB2	Signaling by ERBB2	Trafficking/Signaling			89	TGF-beta receptor signaling activates SMADs	TGF-beta receptor signaling activates SMADs	Adhesion		758	Keratan sulfate degradation	Keratan sulfate degradation
613	Autodegradation of the E3 ubiquitin ligase COP1	Autodegradation of the E3 ubiquitin ligase COP1	Ubiquitin		1336	Noncanonical Wnt signaling pathway	Signaling by WNT	WNT		91	Downregulation of SMAD2/3 SMAD4 transcriptional activity	Downregulation of SMAD2/3:SMAD4 transcriptional activity	Trafficking/Signaling		44	Glucagon signaling in metabolic regulation	Glucagon signaling in metabolic regulation	Metaobolism			240	tumor suppressor arf inhibits ribosomal biogenesis	Major pathway of rRNA processing in the nucleolus and cytosol	Ribosome		784	Factors involved in megakaryocyte development and platelet production	Factors involved in megakaryocyte development and platelet production	Adhesion		364	Transport of the SLBP Dependant Mature mRNA	Transport of the SLBP Dependant Mature mRNA	Ribosome		1168	Ribosomal scanning and start codon recognition	Ribosomal scanning and start codon recognition	Ribosome			938	eNOS activation	eNOS activation	Trafficking/Signaling		1288	CDK-mediated phosphorylation and removal of Cdc6	CDK-mediated phosphorylation and removal of Cdc6
1009	Assembly of the pre-replicative complex	Assembly of the pre-replicative complex	DNA		1220	Presenilin action in Notch and Wnt signaling	Signaling by WNT	WNT		637	Transport to the Golgi and subsequent modification	Transport to the Golgi and subsequent modification	Trafficking/Signaling								192	aspirin blocks signaling pathway involved in platelet activation	Platelet activation, signaling and aggregation	Adhesion		58	L1CAM interactions	L1CAM interactions	Adhesion		665	CDC42 signaling events	CDC42 GTPase cycle	Trafficking/Signaling		1171	Translation initiation complex formation	Translation initiation complex formation	Ribosome			162	Integration of energy metabolism	Integration of energy metabolism	Metabolism		312	RAF activation	RAF activation
689	Destabilization of mRNA by AUF1 hnRNP D0	AUF1 (hnRNP D0) binds and destabilizes mRNA	Ribosome		717	Wnt signaling network	Signaling by WNT	WNT		1242	L13a-mediated translational silencing of Ceruloplasmin expression	L13a-mediated translational silencing of Ceruloplasmin expression	Ribosome								203	Toll Like Receptor TLR1 TLR2 Cascade	Toll Like Receptor TLR1:TLR2 Cascade	Immunity		1003	COPI Mediated Transport	COPI-mediated anterograde transport	Trafficking/Signaling		1349	basic mechanisms of sumoylation	SUMOylation of ubiquitinylation proteins	Nucleus		1146	CD28 co-stimulation	CD28 co-stimulation	Trafficking/Signaling			1272	Chemokine receptors bind chemokines	Chemokine receptors bind chemokines	Immunity		1216	AKT phosphorylates targets in the cytosol	AKT phosphorylates targets in the cytosol
612	Stabilization of p53	Stabilization of p53	p53		34	Canonical Wnt signaling pathway	Signaling by WNT	WNT		1114	hypoxia-inducible factor in the cardivascular system	Regulation of HSF1-mediated heat shock response	Hypoxia								301	Toll Like Receptor 5 TLR5 Cascade	Toll Like Receptor 5 (TLR5) Cascade	Immunity		272	Metabolism of folate and pterines	Metabolism of water-soluble vitamins and cofactors	Metabolism		653	NRAGE signals death through JNK	NRAGE signals death through JNK	Trafficking/Signaling		712	S1P3 pathway	RHO GTPases activate PAKs	Trafficking/Signaling			65	Signal transduction by L1	Signal transduction by L1	Adhesion		115	Cyclin D associated events in G1	Cyclin D associated events in G1
1289	Orc1 removal from chromatin	Orc1 removal from chromatin	DNA		113	Cyclin E associated events during G1/S transition	Cyclin E associated events during G1/S transition	Cell Cycle		429	PKA activation	PKA activation in glucagon signalling	Trafficking/Signaling								847	Toll Like Receptor 10 (TLR10) Cascade	Toll Like Receptor 10 (TLR10) Cascade	Immunity		567	MHC class II antigen presentation	MHC class II antigen presentation	Immunity		577	Formation of RNA Pol II elongation complex	Formation of RNA Pol II elongation complex	Ribosome		233	PLC beta mediated events	PLC beta mediated events	Trafficking/Signaling			1090	Regulation of cytoskeletal remodeling and cell spreading by IPP complex components	Regulation of cytoskeletal remodeling and cell spreading by IPP complex components	Trafficking/Signaling		485	Formation of annular gap junctions	Formation of annular gap junctions
961	Signaling events mediated by the Hedgehog family	Signaling by Hedgehog	Differentiation		566	Cross-presentation of soluble exogenous antigens endosomes	Cross-presentation of soluble exogenous antigens (endosomes)	Immunity		1023	Tight junction interactions	Tight junction interactions	Adhesion								852	MyD88 cascade initiated on plasma membrane	MyD88 cascade initiated on plasma membrane	Immunity		1232	Arachidonic acid metabolism	Arachidonic acid metabolism	Metabolism		1349	basic mechanisms of sumoylation	SUMOylation of SUMOylation proteins	Nucleus		1023	Tight junction interactions	Tight junction interactions	Adhesion			1017	DSCAM interactions	DSCAM interactions	Adhesion		60	Recycling pathway of L1	Recycling pathway of L1
1099	Regulation of PLK1 Activity at G2/M Transition	Regulation of mitotic cell cycle	Cell Cycle		1023	Tight junction interactions	Tight junction	Adhesion		218	Activation of the pre-replicative complex	Activation of the pre-replicative complex	Ribosome								1385	Toll Like Receptor TLR6:TLR2 Cascade	Toll Like Receptor TLR6:TLR2 Cascade	Immunity		1099	Regulation of PLK1 Activity at G2/M Transition	Regulation of PLK1 Activity at G2/M Transition	Cell Cycle		1169	GTP hydrolysis and joining of the 60S ribosomal subunit	GTP hydrolysis and joining of the 60S ribosomal subunit	Ribosome		794	Sema3A PAK dependent Axon repulsion	Sema3A PAK dependent Axon repulsion	Trafficking/Signaling			782	PECAM1 interactions	PECAM1 interactions	Adhesion		369	Gluconeogenesis	Gluconeogenesis
1213	PIP3 activates AKT signaling	PIP3 activates AKT signaling	Kinase		747	Facilitative Na -independent glucose transporters	Glucose metabolism	Metabolism		644	TGF-beta receptor signaling	Signaling by Receptor Tyrosine Kinases	Trafficking/Signaling								1213	PIP3 activates AKT signaling	PIP3 activates AKT signaling	Trafficking/Signaling		1201	Mitotic Prometaphase	Mitotic Prometaphase	Cell Cycle		272	Metabolism of folate and pterines	Metabolism of non-coding RNA	Ribosome		417	Deadenylation of mRNA	Deadenylation of mRNA	Ribosome			1255	Chondroitin sulfate biosynthesis	Chondroitin sulfate biosynthesis	Metabolism		1009	Assembly of the pre-replicative complex	Assembly of the pre-replicative complex
566	Cross-presentation of soluble exogenous antigens endosomes	Cross-presentation of soluble exogenous antigens (endosomes)	Immunity		1210	Activation of NF-kappaB in B Cells	Activation of NF-kappaB in B cells	Immunity		766	Adherens junctions interactions	Adherens junctions interactions	Adhesion								242	TRAF6 mediated IRF7 activation in TLR7/8 or 9 signaling	TRAF6 mediated induction of NFkB and MAP kinases upon TLR7/8 or 9 activation	Immunity		434	il-2 receptor beta chain in t cell activation	Signaling by Interleukins	Immunity		597	snRNP Assembly	snRNP Assembly	Ribosome		1349	basic mechanisms of sumoylation	SUMOylation of DNA damage response and repair proteins	Nuclear			505	Integrin cell surface interactions	Integrin cell surface interactions	Adhesion		1102	Recruitment of NuMA to mitotic centrosomes	Recruitment of NuMA to mitotic centrosomes
1290	Switching of origins to a post-replicative state	Switching of origins to a post-replicative state	DNA		614	p53-Dependent G1 DNA Damage Response	p53-Dependent G1 DNA Damage Response	Cell Cycle		44	Glucagon signaling in metabolic regulation	Glucagon signaling in metabolic regulation	Trafficking/Signaling								886	RNA Polymerase I Transcription Initiation	RNA Polymerase I Transcription Initiation	Ribosome		50	Apoptotic cleavage of cellular proteins	Apoptotic cleavage of cellular proteins	Apoptotic		749	Regulation of Glucokinase by Glucokinase Regulatory Protein	Regulation of Glucokinase by Glucokinase Regulatory Protein	Ribosome		801	oxidative stress induced gene expression via nrf2	Oxidative Stress Induced Senescence	Hypoxia			149	Iron uptake and transport	Iron uptake and transport	Metabolism		489	Gap junction degradation	Gap junction degradation
1210	Activation of NF-kappaB in B Cells	Activation of NF-kappaB in B cells	Immunity		1201	Mitotic Prometaphase	Mitotic Prometaphase	Cell Cycle		856	mTOR signaling pathway	MTOR signalling	Amino Acids								1349	basic mechanisms of sumoylation	SUMOylation of chromatin organization proteins	Nuclear		1202	Resolution of Sister Chromatid Cohesion	Resolution of Sister Chromatid Cohesion	DNA		1199	Clearance of Nuclear Envelope Membranes from Chromatin	Nuclear Envelope (NE) Reassembly	Nucleus		1202	Resolution of Sister Chromatid Cohesion	Resolution of Sister Chromatid Cohesion	DNA			769	RNA Polymerase III Transcription Initiation From Type 3 Promoter	RNA Polymerase III Transcription Initiation From Type 3 Promoter	DNA		117	Amplification of signal from unattached kinetochores via a MAD2 inhibitory signal	Amplification of signal from unattached kinetochores via a MAD2 inhibitory signal
1285	Canonical NF-kappaB pathway	Activation of NF-kappaB in B cells	Immunity		4	Ubiquitin-dependent degradation of Cyclin D1	Ubiquitin-dependent degradation of Cyclin D	Cell Cycle		972	skeletal muscle hypertrophy is regulated via akt-mtor pathway	MTOR signalling	Amino Acids								999	Golgi Associated Vesicle Biogenesis	Golgi Associated Vesicle Biogenesis	Trafficking/Signaling		60	Recycling pathway of L1	Recycling pathway of L1	Adhesion		196	Signaling by PDGF	Signaling by Receptor Tyrosine Kinases	Trafficking/Signaling		708	a6b1 and a6b4 Integrin signaling	Integrin signaling	Adhesion			268	TNF signaling	TNF signaling	Trafficking/Signaling		755	HS-GAG degradation	HS-GAG degradation
833	Regulation of ornithine decarboxylase ODC	Regulation of ornithine decarboxylase (ODC)	Metabolism		1343	Oxygen-dependent proline hydroxylation of Hypoxia-inducible Factor Alpha	Oxygen-dependent proline hydroxylation of Hypoxia-inducible Factor Alpha	Hypoxia		1206	mtor signaling pathway	MTOR signalling	Amino Acids								777	RNA Polymerase II Pre-transcription Events	RNA Polymerase II Pre-transcription Events	Ribosome		875	Signaling by FGFR3 mutants	Signaling by FGFR3	Trafficking/Signaling		291	Signaling by SCF-KIT	Signaling by Receptor Tyrosine Kinases	Trafficking/Signaling		716	amb2 Integrin signaling	Integrin signaling	Adhesion			762	Gap-filling DNA repair synthesis and ligation in TC-NER	Gap-filling DNA repair synthesis and ligation in TC-NER	DNA		1290	Switching of origins to a post-replicative state	Switching of origins to a post-replicative state
638	ER Quality Control Compartment ERQC	ER to Golgi Anterograde Transport	Trafficking/Signaling		1009	Assembly of the pre-replicative complex	Assembly of the pre-replicative complex	DNA		50	Apoptotic cleavage of cellular proteins	Apoptotic cleavage of cell adhesion proteins	Apoptotic								1379	akap95 role in mitosis and chromosome dynamics	Chromosome Maintenance	DNA		856	mTOR signaling pathway	MTOR signalling	Amino Acids		321	G alpha 12/13 signalling events	G alpha (12/13) signalling events	Trafficking/Signaling		998	a4b7 Integrin signaling	Integrin signaling	Adhesion			108	NOD1/2 Signaling Pathway	NOD1/2 Signaling Pathway	Immunity		1271	Tachykinin receptors bind tachykinins	Tachykinin receptors bind tachykinins
1073	Platelet Adhesion to exposed collagen	Platelet activation, signaling and aggregation	Adhesion		613	Autodegradation of the E3 ubiquitin ligase COP1	Autodegradation of the E3 ubiquitin ligase COP1	Trafficking/Signaling		1330	Apoptotic cleavage of cell adhesion proteins	Apoptotic cleavage of cell adhesion proteins	Apoptotic								893	U2 Dependent Splicing	mRNA Splicing - Major Pathway	Ribosome		619	granzyme a mediated apoptosis pathway	Intrinsic Pathway for Apoptosis	Apoptotic		51	Apoptotic execution phase	Apoptotic execution phase	Apoptotic		886	RNA Polymerase I Transcription Initiation	RNA Polymerase I Transcription Initiation	Ribosome			276	Branched-chain amino acid catabolism	Branched-chain amino acid catabolism	Amino acids		1180	Signaling by NOTCH4	Signaling by NOTCH4
355	Platelet Aggregation Plug Formation	Platelet activation, signaling and aggregation	Adhesion		403	Ubiquitin Mediated Degradation of Phosphorylated Cdc25A	Ubiquitin Mediated Degradation of Phosphorylated Cdc25A	Cell Cycle		1003	COPI Mediated Transport	COPI-mediated anterograde transport	Trafficking/Signaling								785	Kinesins	Kinesins	Cell Cycle		571	Signal attenuation	Signal attenuation	Trafficking/Signaling		856	mTOR signaling pathway	MTOR signalling	Amino Acids		1145	Costimulation by the CD28 family	Costimulation by the CD28 family	Trafficking/Signaling			640	O-linked glycosylation of mucins	O-linked glycosylation of mucins	Metabolism		453	Purine ribonucleoside monophosphate biosynthesis	Purine ribonucleoside monophosphate biosynthesis
1157	Platelet degranulation	Platelet activation, signaling and aggregation	Adhesion		402	p53-Independent DNA Damage Response	p53-Independent DNA Damage Response	DNA		1212	VEGFR1 specific signals	Signaling by VEGF	Trafficking/Signaling								1212	VEGFR1 specific signals	Signaling by VEGF	Trafficking/Signaling		1166	Stimuli-sensing channels	Stimuli-sensing channels	Trafficking/Signaling		972	skeletal muscle hypertrophy is regulated via akt-mtor pathway	MTOR signalling	Amino Acids		712	S1P3 pathway	RHO GTPases Activate Formins				877	DNA Damage Recognition in GG-NER	DNA Damage Recognition in GG-NER	DNA		1069	Reduction of cytosolic Ca++ levels	Reduction of cytosolic Ca++ levels
1068	Platelet sensitization by LDL	Platelet activation, signaling and aggregation	Adhesion		1185	ABC-family proteins mediated transport	ABC-family proteins mediated transport	Trafficking/Signaling		240	tumor suppressor arf inhibits ribosomal biogenesis	Major pathway of rRNA processing in the nucleolus and cytosol	Ribosome								1291	DNA replication initiation	DNA replication initiation	DNA		297	Signaling by ERBB2	Signaling by ERBB2	Trafficking/Signaling		1206	mtor signaling pathway	MTOR signalling	Amino Acids		904	DCC mediated attractive signaling	DCC mediated attractive signaling	Trafficking/Signaling			879	Dual Incision in GG-NER	Dual Incision in GG-NER	DNA		1185	ABC-family proteins mediated transport	ABC-family proteins mediated transport
1043	Autodegradation of Cdh1 by Cdh1:APC/C	Autodegradation of Cdh1 by Cdh1:APC/C	Cell Cycle		818	Hypoxic and oxygen homeostasis regulation of HIF-1-alpha	Cellular response to hypoxia	Hypoxia		567	MHC class II antigen presentation	MHC class II antigen presentation	Trafficking/Signaling								567	MHC class II antigen presentation	MHC class II antigen presentation	Immunity		242	TRAF6 mediated IRF7 activation in TLR7/8 or 9 signaling	Toll-like Receptor Cascades	Immunity		1242	L13a-mediated translational silencing of Ceruloplasmin expression	L13a-mediated translational silencing of Ceruloplasmin expression	Amino Acids		1342	Smooth Muscle Contraction	Smooth Muscle Contraction	Trafficking/Signaling			273	Nicotinamide salvaging	Nicotinamide salvaging	Metabolism		1082	Interleukin-1 signaling	Interleukin-1 signaling
1345	agrin in postsynaptic differentiation	Cargo recognition for clathrin-mediated endocytosis	Trafficking/Signaling		120	HIF-2-alpha transcription factor network	Cellular response to heat stress	Hypoxia		384	p75NTR recruits signalling complexes	p75NTR recruits signalling complexes	Trafficking/Signaling								1349	basic mechanisms of sumoylation	SUMOylation of transcription cofactors	Nuclear		51	Apoptotic execution phase	Apoptotic execution phase	Apoptotic		886	RNA Polymerase I Transcription Initiation	RNA Polymerase I Transcription Initiation	Ribosome		736	Aurora A signaling	AURKA Activation by TPX2	Trafficking/Signaling			1142	Translocation of ZAP-70 to Immunological synapse	Translocation of ZAP-70 to Immunological synapse	Immunity		1175	Pre-NOTCH Processing in Golgi	Pre-NOTCH Processing in Golgi
969	Collagen biosynthesis and modifying enzymes	Collagen biosynthesis and modifying enzymes	Adhesion		504	Degradation of beta-catenin by the destruction complex	Degradation of AXIN	WNT		1316	hop pathway in cardiac development	HSP90 chaperone cycle for steroid hormone receptors (SHR) in the presence of ligand	Trafficking/Signaling								120	HIF-2-alpha transcription factor network	Cellular response to heat stress	Hypoxia		999	Golgi Associated Vesicle Biogenesis	Golgi Associated Vesicle Biogenesis	Trafficking/Signaling		1213	PIP3 activates AKT signaling	PIP3 activates AKT signaling	Trafficking/Signaling		329	Opioid Signalling	Opioid Signalling	Trafficking/Signaling			1196	Golgi Cisternae Pericentriolar Stack Reorganization	Golgi Cisternae Pericentriolar Stack Reorganization	Trafficking/Signaling		58	L1CAM interactions	L1CAM interactions
614	p53-Dependent G1 DNA Damage Response	p53-Dependent G1 DNA Damage Response	Cell Cycle		142	Degradation of beta catenin	Degradation of AXIN	WNT		429	PKA activation	PKA activation	Trafficking/Signaling								818	Hypoxic and oxygen homeostasis regulation of HIF-1-alpha	Cellular response to heat stress	Hypoxia		1081	Toll Like Receptor 4 (TLR4) Cascade	Toll Like Receptor 4 (TLR4) Cascade	Immunity		368	Glycolysis	Glycolysis	Metabolism		1159	Response to elevated platelet cytosolic Ca2	Response to elevated platelet cytosolic Ca2+	Adhesion			329	Opioid Signalling	Opioid Signalling	Trafficking/Signaling		344	DAP12 signaling	DAP12 signaling
402	p53-Independent DNA Damage Response	p53-Independent DNA Damage Response	Cell Cycle		1099	Regulation of PLK1 Activity at G2/M Transition	Regulation of mitotic cell cycle	Cell Cycle		432	PKA-mediated phosphorylation of CREB	PKA-mediated phosphorylation of CREB									924	hypoxia and p53 in the cardiovascular system	Cellular response to heat stress	Hypoxia		1213	PIP3 activates AKT signaling	PIP3 activates AKT signaling	Trafficking/Signaling		895	mRNA Splicing - Minor Pathway	mRNA Splicing - Minor Pathway	Ribosome		355	Platelet Aggregation Plug Formation	Platelet Aggregation (Plug Formation)	Adhesion			779	RNA Polymerase II Transcription Elongation	RNA Polymerase II Transcription Elongation	DNA		1197	Loss of Nlp from mitotic centrosomes	Loss of Nlp from mitotic centrosomes
403	Ubiquitin Mediated Degradation of Phosphorylated Cdc25A	Ubiquitin Mediated Degradation of Phosphorylated Cdc25A	Cell Cycle		1289	Orc1 removal from chromatin	Orc1 removal from chromatin	DNA		784	Factors involved in megakaryocyte development and platelet production	Factors involved in megakaryocyte development and platelet production	Adhesion								762	Gap-filling DNA repair synthesis and ligation in TC-NER	Gap-filling DNA repair synthesis and ligation in TC-NER	DNA		818	Hypoxic and oxygen homeostasis regulation of HIF-1-alpha	Cellular response to heat stress	Hypoxia		50	Apoptotic cleavage of cellular proteins	Apoptotic cleavage of cellular proteins	Apoptotic		779	RNA Polymerase II Transcription Elongation	RNA Polymerase II Transcription Elongation	Ribosome			755	HS-GAG degradation	HS-GAG degradation	DNA		1101	Loss of proteins required for interphase microtubule organization from the centrosome	Loss of proteins required for interphase microtubule organization from the centrosome
564	Antigen processing Ubiquitination Proteasome degradation	Antigen processing: Ubiquitination & Proteasome degradation	Immunity		612	Stabilization of p53	Stabilization of p53	Trafficking/Signaling		114	G0 and Early G1	G0 and Early G1	Cell Cycle								1027	MAP kinase activation	MAP kinase activation	Trafficking/Signaling		1067	Elevation of cytosolic Ca2+ levels	Elevation of cytosolic Ca2+ levels	Trafficking/Signaling		1349	basic mechanisms of sumoylation	SUMOylation of transcription cofactors	Nucleus		1173	Formation of the ternary complex and subsequently the 43S complex	Formation of the ternary complex, and subsequently, the 43S complex	Ribosome			265	Dimerization of procaspase-8	Dimerization of procaspase-8	Apototic		1381	Terminal pathway of complement	Terminal pathway of complement
516	IL1-mediated signaling events	Interleukin-1 family signaling	Immunity		1349	basic mechanisms of sumoylation	SUMOylation of DNA replication proteins	Nuclear		1379	akap95 role in mitosis and chromosome dynamics	Chromosome Maintenance	DNA								765	Dual incision reaction in TC-NER	Dual incision in TC-NER	DNA		818	Hypoxic and oxygen homeostasis regulation of HIF-1-alpha	Cellular response to chemical stress	Hypoxia		596	Nonsense Mediated Decay Independent of the Exon Junction Complex	Nonsense Mediated Decay (NMD) independent of the Exon Junction Complex (EJC)	Ribosome		426	CaM pathway	CaM pathway	Trafficking/Signaling			1019	Type I hemidesmosome assembly	Type I hemidesmosome assembly	Adhesion
1083	Interleukin-1 processing	Interleukin-1 family signaling	Immunity		1043	Autodegradation of Cdh1 by Cdh1:APC/C	Autodegradation of Cdh1 by Cdh1:APC/C	Cell Cycle		231	DARPP-32 events	DARPP-32 events	Trafficking/Signaling								591	FoxO family signaling	FOXO-mediated transcription	Trafficking/Signaling		738	ERKs are inactivated	ERKs are inactivated	Trafficking/Signaling		684	Nonsense Mediated Decay Enhanced by the Exon Junction Complex	Nonsense Mediated Decay (NMD) independent of the Exon Junction Complex (EJC)	Ribosome		431	Calmodulin induced events	Calmodulin induced events	Trafficking/Signaling			551	Activation of Ca-permeable Kainate Receptor	Activation of Ca-permeable Kainate Receptor	Trafficking/Signaling
1082	Interleukin-1 signaling	Interleukin-1 family signaling	Immunity		987	Transport of the SLBP independent Mature mRNA	Transport of the SLBP independent Mature mRNA	Ribosome		193	Lissencephaly gene LIS1 in neuronal migration and development	Neuronal System	Differentiation								957	Polymerase switching on the C-strand of the telomere	Polymerase switching on the C-strand of the telomere	DNA		322	G alpha q signalling events	G alpha (q) signalling events	Trafficking/Signaling		1221	cdk regulation of dna replication	DNA Replication Pre-Initiation	DNA		97	E2F transcription factor network	Transcriptional Regulation by E2F6	Trafficking/Signaling			168	Glycosphingolipid metabolism	Glycosphingolipid metabolism	Metabolism
891	Processing of Capped Intron-Containing Pre-mRNA	Processing of Capped Intron-Containing Pre-mRNA	Ribosome		1223	Asparagine N-linked glycosylation	Asparagine N-linked glycosylation	Metabolism		506	Hippo signaling cascade	Signaling by Hippo	Trafficking/Signaling								1349	basic mechanisms of sumoylation	SUMOylation of DNA replication proteins	Nuclear		117	Amplification of signal from unattached kinetochores via a MAD2 inhibitory signal	Amplification of signal from unattached kinetochores via a MAD2 inhibitory signal	Cell Cycle		1172	Formation of a pool of free 40S subunits	Formation of a pool of free 40S subunits	Ribosome		420	ca-calmodulin-dependent protein kinase activation	Calmodulin induced events	Trafficking/Signaling			458	Synthesis of IP3 and IP4 in the cytosol	Synthesis of IP3 and IP4 in the cytosol	Metabolism
141	Regulation of Ras family activation	Regulation of RAS by GAPs	Kinase		364	Transport of the SLBP Dependant Mature mRNA	Transport of the SLBP Dependant Mature mRNA	Ribosome		599	Notch-HLH transcription pathway	Notch-HLH transcription pathway	DNA								2	Processive synthesis on the lagging strand	Processive synthesis on the lagging strand	DNA		369	Gluconeogenesis	Gluconeogenesis	Metabolism		411	ATM mediated response to DNA double-strand break	DNA Double-Strand Break Repair	DNA		856	mTOR signaling pathway	MTOR signalling	Amino Acids			1022	Cell-extracellular matrix interactions	Cell-extracellular matrix interactions	Adhesion
113	Cyclin E associated events during G1/S transition	Cyclin E associated events during G1/S transition	Cell Cycle		1290	Switching of origins to a post-replicative state	Switching of origins to a post-replicative state	DNA		1289	Orc1 removal from chromatin	Orc1 removal from chromatin	DNA								3	Removal of the Flap Intermediate	Removal of the Flap Intermediate	DNA		46	Regulation of Insulin Secretion	Regulation of insulin secretion	Insulin		637	Transport to the Golgi and subsequent modification	Transport to the Golgi and subsequent modification	Trafficking/Signaling		972	skeletal muscle hypertrophy is regulated via akt-mtor pathway	MTOR signalling	Amino Acids			576	Formation of the Early Elongation Complex	Formation of the Early Elongation Complex	DNA
963	Degradation of collagen	Degradation of the extracellular matrix	Adhesion		828	Citric acid cycle TCA cycle	Citric acid cycle (TCA cycle)	Metabolism		777	RNA Polymerase II Pre-transcription Events	RNA Polymerase II Pre-transcription Events	Ribosome								959	Telomere C-strand Lagging Strand Synthesis	Telomere C-strand (Lagging Strand) Synthesis	DNA		90	TGF-beta receptor signaling in EMT epithelial to mesenchymal transition	TGF-beta receptor signaling activates SMADs	Adhesion		914	Mitotic Telophase/Cytokinesis	Mitotic Telophase/Cytokinesis	Cell Cycle		1206	mtor signaling pathway	MTOR signalling	Amino Acids			115	Cyclin D associated events in G1	Cyclin D associated events in G1	Cell Cycle
362	Metabolism of polyamines	Metabolism of polyamines	Metabolism		1288	CDK-mediated phosphorylation and removal of Cdc6	CDK-mediated phosphorylation and removal of Cdc6	Cell Cycle		620	S6K1-mediated signalling	mTORC1-mediated signalling	Amino Acids								330	FOXA1 transcription factor network	Nuclear Events (kinase and transcription factor activation)	Nuclear		273	Nicotinamide salvaging	Nicotinamide salvaging	Metabolism		747	Facilitative Na -independent glucose transporters	Glucose metabolism	Metabolism		468	Frs2-mediated activation	Frs2-mediated activation	Trafficking/Signaling			785	Kinesins	Kinesins	Cell Cycle
805	Calcium signaling in the CD4 TCR pathway	Downstream TCR signaling	Downstream		1202	Resolution of Sister Chromatid Cohesion	Resolution of Sister Chromatid Cohesion	DNA		621	S6K1 signalling	mTORC1-mediated signalling	Amino Acids								957	Polymerase switching on the C-strand of the telomere	Polymerase switching	DNA		1089	Interferon gamma signaling	Interferon gamma signaling	Immunity		620	S6K1-mediated signalling	mTORC1-mediated signalling	Amino Acids		914	Mitotic Telophase/Cytokinesis	Mitotic Telophase/Cytokinesis	Cell Cycle			599	Notch-HLH transcription pathway	Notch-HLH transcription pathway	DNA
1144	Downstream TCR signaling	Downstream TCR signaling	Downstream		1349	basic mechanisms of sumoylation	SUMOylation of ubiquitinylation proteins	Nuclear		426	CaM pathway	CaM pathway	Trafficking/Signaling								1286	Leading Strand Synthesis	Leading Strand Synthesis	DNA		157	Ligand-gated ion channel transport	Ion channel transport	Trafficking/Signaling		417	Deadenylation of mRNA	Deadenylation of mRNA	Ribosome		1172	Formation of a pool of free 40S subunits	Formation of a pool of free 40S subunits	Ribosome			1141	Phosphorylation of CD3 and TCR zeta chains	Phosphorylation of CD3 and TCR zeta chains	Trafficking/Signaling
1288	CDK-mediated phosphorylation and removal of Cdc6	CDK-mediated phosphorylation and removal of Cdc6	Cell Cycle		77	Signaling events mediated by HDAC Class I	SUMOylation of ubiquitinylation proteins	Nuclear		364	Transport of the SLBP Dependant Mature mRNA	Transport of Mature Transcript to Cytoplasm	Ribosome								67	Hormone-sensitive lipase HSL-mediated triacylglycerol hydrolysis	Intracellular metabolism of fatty acids regulates insulin secretion	Metabolism		966	Elastic fibre formation	Elastic fibre formation	Adhesion		58	L1CAM interactions	L1CAM interactions	Adhesion		425	DAG and IP3 signaling	DAG and IP3 signaling	Trafficking/Signaling			999	Golgi Associated Vesicle Biogenesis	Golgi Associated Vesicle Biogenesis	Trafficking/Signaling
215	Cyclin A Cdk2-associated events at S phase entry	Cyclin A:Cdk2-associated events at S phase entry	Cell Cycle		1015	TCR signaling in na ve CD8 T cells	TCR signaling	Immunity		425	DAG and IP3 signaling	DAG and IP3 signaling	Trafficking/Signaling								108	NOD1/2 Signaling Pathway	NOD1/2 Signaling Pathway	Immunity		193	Lissencephaly gene LIS1 in neuronal migration and development	Neuronal System	Differentiation		1221	cdk regulation of dna replication	DNA Replication	DNA		1099	Regulation of PLK1 Activity at G2/M Transition	Regulation of PLK1 Activity at G2/M Transition	Cell Cycle			740	activated TAK1 mediates p38 MAPK activation	activated TAK1 mediates p38 MAPK activation	Trafficking/Signaling
1114	hypoxia-inducible factor in the cardivascular system	Regulation of HSF1-mediated heat shock response	Hypoxia		444	TCR signaling in na ve CD4 T cells	TCR signaling	Immunity		896	Transport of Mature mRNA derived from an Intron-Containing Transcript	Transport of Mature Transcript to Cytoplasm	Ribosome								268	TNF signaling	TNF signaling	Trafficking/Signaling		1199	Clearance of Nuclear Envelope Membranes from Chromatin	Nuclear Envelope (NE) Reassembly	Nuclear		917	Initiation of Nuclear Envelope (NE) Reformation	Initiation of Nuclear Envelope (NE) Reformation	Nucleus		990	GRB2:SOS provides linkage to MAPK signaling for Integrins	GRB2:SOS provides linkage to MAPK signaling for Integrins	Trafficking/Signaling			121	P2Y receptors	P2Y receptors	Trafficking/Signaling
1339	Regulation of Gene Expression by Hypoxia-inducible Factor	Regulation of HSF1-mediated heat shock response	Hypoxia		187	JNK signaling in the CD4 TCR pathway	TCR signaling	Immunity		1290	Switching of origins to a post-replicative state	Switching of origins to a post-replicative state	DNA								665	CDC42 signaling events	CDC42 GTPase cycle	Trafficking/Signaling		1022	Cell-extracellular matrix interactions	Cell-extracellular matrix interactions	Adhesion		1003	COPI Mediated Transport	COPI-mediated anterograde transport	Trafficking/Signaling		1363	Downregulation of ERBB2 ERBB3 signaling	Downregulation of ERBB2 signaling	Trafficking/Signaling			1190	Interleukin-2 signaling	Interleukin-2 signaling	Immunity
155	Ion transport by P-type ATPases	Ion channel transport	Trafficking/Signaling		988	Transport of Mature mRNA Derived from an Intronless Transcript	Transport of Mature mRNA Derived from an Intronless Transcript	Ribosome		576	Formation of the Early Elongation Complex	Formation of the Early Elongation Complex	DNA								232	Gastrin-CREB signalling pathway via PKC and MAPK	Gastrin-CREB signalling pathway via PKC and MAPK	Trafficking/Signaling		558	IRS activation	IRS activation	Trafficking/Signaling		913	Cohesin Loading onto Chromatin	Cohesin Loading onto Chromatin	DNA		399	G2/M DNA damage checkpoint	G2/M DNA damage checkpoint	Cell Cycle			1068	Platelet sensitization by LDL	Platelet sensitization by LDL	Adhesion
157	Ligand-gated ion channel transport	Ion channel transport	Trafficking/Signaling		988	Transport of Mature mRNA Derived from an Intronless Transcript	Transport of Mature mRNAs Derived from Intronless Transcripts	Ribosome		1282	Transport of inorganic cations/anions and amino acids/oligopeptides	Transport of inorganic cations/anions and amino acids/oligopeptides	Trafficking/Signaling								1202	Resolution of Sister Chromatid Cohesion	Resolution of Sister Chromatid Cohesion	DNA		869	Signaling by FGFR4 mutants	Signaling by FGFR4	Trafficking/Signaling		1264	SRP-dependent cotranslational protein targeting to membrane	SRP-dependent cotranslational protein targeting to membrane	Ribosome		952	G2/M DNA replication checkpoint	G2/M DNA damage checkpoint	Cell Cycle			155	Ion transport by P-type ATPases	Ion transport by P-type ATPases	Trafficking/Signaling
637	Transport to the Golgi and subsequent modification	Transport to the Golgi and subsequent modification	Trafficking/Signaling		827	Respiratory electron transport	Respiratory electron transport	Metabolism		568	ER-Phagosome pathway	ER-Phagosome pathway	Trafficking/Signaling								495	Processing of DNA double-strand break ends	Processing of DNA double-strand break ends	DNA		788	Cell surface interactions at the vascular wall	Cell surface interactions at the vascular wall	Adhesion		946	wnt signaling pathway	Signaling by WNT	WNT		1281	cell cycle g2/m checkpoint	G2/M DNA damage checkpoint	Cell Cycle			110	Inflammasomes	Inflammasomes	Immunity
1138	Hedgehog signaling events mediated by Gli proteins	Hedgehog ligand biogenesis	Differentiation		1349	basic mechanisms of sumoylation	SUMOylation of RNA binding proteins	Nuclear		1172	Formation of a pool of free 40S subunits	Formation of a pool of free 40S subunits	Ribosome								1349	basic mechanisms of sumoylation	SUMOylation of SUMOylation proteins	Nuclear		309	cell cycle g1/s check point	Cell Cycle Checkpoints	Cell Cycle		1336	Noncanonical Wnt signaling pathway	Signaling by WNT	WNT		1157	Platelet degranulation	Platelet degranulation	Adhesion			1215	AKT phosphorylates targets in the nucleus	AKT phosphorylates targets in the nucleus	DNA
1343	Oxygen-dependent proline hydroxylation of Hypoxia-inducible Factor Alpha	Oxygen-dependent proline hydroxylation of Hypoxia-inducible Factor Alpha	Hypoxia		77	Signaling events mediated by HDAC Class I	SUMOylation of RNA binding proteins	Nuclear		1179	Signaling by NOTCH3	Signaling by NOTCH	Trafficking/Signaling								117	Amplification of signal from unattached kinetochores via a MAD2 inhibitory signal	Amplification of signal from unattached kinetochores via a MAD2 inhibitory signal	Cell Cycle		963	Degradation of collagen	Degradation of the extracellular matrix	Adhesion		422	cadmium induces dna synthesis and proliferation in macrophages	Synthesis of DNA	DNA		1349	basic mechanisms of sumoylation	SUMOylation of RNA binding proteins	Nuclear			362	Metabolism of polyamines	Metabolism of polyamines	Metabolism
1138	Hedgehog signaling events mediated by Gli proteins	Hedgehog 'on' state	Differentiation		1003	COPI Mediated Transport	COPI-mediated anterograde transport	Trafficking/Signaling		222	Phosphorylation of proteins involved in G1/S transition by active Cyclin E Cdk2 complexes	Phosphorylation of proteins involved in G1/S transition by active Cyclin E:Cdk2 complexes	Cell Cycle								276	Branched-chain amino acid catabolism	Branched-chain amino acid catabolism	Metabolism		138	role of ran in mitotic spindle regulation	Mitotic Spindle Checkpoint	Cell Cycle		1168	Ribosomal scanning and start codon recognition	Ribosomal scanning and start codon recognition	Ribosome		597	snRNP Assembly	snRNP Assembly	Ribosome			1000	Lysosome Vesicle Biogenesis	Lysosome Vesicle Biogenesis	Trafficking/Signaling
120	HIF-2-alpha transcription factor network	Cellular response to hypoxia	Hypoxia		1349	basic mechanisms of sumoylation	SUMOylation of SUMOylation proteins	Nuclear		589	Dopamine clearance from the synaptic cleft	Dopamine clearance from the synaptic cleft	Metabolism								291	Signaling by SCF-KIT	Signaling by SCF-KIT	Trafficking/Signaling		698	Fibroblast Growth Factor Receptor FGFR signaling	Signaling by FGFR	Trafficking/Signaling		506	Hippo signaling cascade	Signaling by Hippo	Trafficking/Signaling		727	Metabolism of Angiotensinogen to Angiotensins	Metabolism of non-coding RNA	Ribosome			1099	Regulation of PLK1 Activity at G2/M Transition	Regulation of PLK1 Activity at G2/M Transition	Cell Cycle
924	hypoxia and p53 in the cardiovascular system	Cellular response to hypoxia	Hypoxia		77	Signaling events mediated by HDAC Class I	SUMOylation of SUMOylation proteins	Nuclear		1158	Disinhibition of SNARE formation	Disinhibition of SNARE formation	Trafficking/Signaling								312	RAF activation	RAF activation	Trafficking/Signaling		737	ERK/MAPK targets	ERK/MAPK targets	Trafficking/Signaling		1009	Assembly of the pre-replicative complex	Assembly of the pre-replicative complex	DNA		271	rac1 cell motility signaling pathway	MET promotes cell motility	Trafficking/Signaling			202	VEGF ligand-receptor interactions	VEGF ligand-receptor interactions	Trafficking/Signaling
138	role of ran in mitotic spindle regulation	Mitotic Spindle Checkpoint	Cell Cycle		1157	Platelet degranulation	Platelet degranulation	Adhesion		999	Golgi Associated Vesicle Biogenesis	Golgi Associated Vesicle Biogenesis	Trafficking/Signaling								617	pten dependent cell cycle arrest and apoptosis	Cell Cycle Checkpoints	Cell Cycle		645	Insulin receptor mediated signaling	Insulin receptor signalling cascade	Insulin		567	MHC class II antigen presentation	MHC class II antigen presentation	Immunity		113	Cyclin E associated events during G1/S transition	Cyclin E associated events during G1/S transition	Cell Cycle			293	VEGF binds to VEGFR leading to receptor dimerization	VEGF binds to VEGFR leading to receptor dimerization	Trafficking/Signaling
117	Amplification of signal from unattached kinetochores via a MAD2 inhibitory signal	Amplification of signal from unattached kinetochores via a MAD2 inhibitory signal	Cell Cycle		895	mRNA Splicing - Minor Pathway	mRNA Splicing - Minor Pathway	Ribosome		717	Wnt signaling network	Signaling by WNT	WNT								1349	basic mechanisms of sumoylation	SUMOylation of ubiquitinylation proteins	Nuclear		905	Netrin-1 signaling	Netrin-1 signaling	Adhesion		1379	akap95 role in mitosis and chromosome dynamics	Chromosome Maintenance	DNA		1100	Recruitment of mitotic centrosome proteins and complexes	Recruitment of mitotic centrosome proteins and complexes	Cell Cycle			569	Endosomal/Vacuolar pathway	Endosomal/Vacuolar pathway	Trafficking/Signaling
187	JNK signaling in the CD4 TCR pathway	TCR signaling	Immunity		1159	Response to elevated platelet cytosolic Ca2	Response to elevated platelet cytosolic Ca2+	Trafficking/Signaling		946	wnt signaling pathway	Signaling by WNT	WNT								876	Formation of incision complex in GG-NER	Formation of Incision Complex in GG-NER	DNA		162	Integration of energy metabolism	Integration of energy metabolism	Metabolism		495	Processing of DNA double-strand break ends	Processing of DNA double-strand break ends	DNA		518	Ephrin B reverse signaling	Ephrin signaling	Trafficking/Signaling			131	Leukotriene receptors	Leukotriene receptors	Immunity
444	TCR signaling in na ve CD4 T cells	TCR signaling	Immunity		453	Purine ribonucleoside monophosphate biosynthesis	Purine ribonucleoside monophosphate biosynthesis	Metabolism													157	Ligand-gated ion channel transport	Ion channel transport	Trafficking/Signaling		203	Toll Like Receptor TLR1 TLR2 Cascade	Toll Like Receptor TLR1:TLR2 Cascade	Immunity		736	Aurora A signaling	AURKA Activation by TPX2	Trafficking/Signaling		138	role of ran in mitotic spindle regulation	Mitotic Spindle Checkpoint	Cell Cycle			311	Trafficking of AMPA receptors	Trafficking of AMPA receptors	Immunity
1015	TCR signaling in na ve CD8 T cells	TCR signaling	Immunity		51	Apoptotic execution phase	Apoptotic execution phase	Apoptotic													1082	Interleukin-1 signaling	Interleukin-1 signaling	Trafficking/Signaling		301	Toll Like Receptor 5 TLR5 Cascade	Toll Like Receptor 5 (TLR5) Cascade	Immunity		760	Fanconi Anemia pathway	Fanconi Anemia Pathway	Metabolism		312	RAF activation	RAF activation	Trafficking/Signaling			195	Retrograde neurotrophin signalling	Retrograde neurotrophin signalling	Trafficking/Signaling
162	Integration of energy metabolism	Integration of energy metabolism	Metabolism		567	MHC class II antigen presentation	MHC class II antigen presentation	Immunity													1223	Asparagine N-linked glycosylation	Asparagine N-linked glycosylation	Metabolism		847	Toll Like Receptor 10 (TLR10) Cascade	Toll Like Receptor 10 (TLR10) Cascade	Immunity		399	G2/M DNA damage checkpoint	G2/M DNA damage checkpoint	Cell Cycle		1349	basic mechanisms of sumoylation	SUMOylation of transcription cofactors	Nuclear			117	Amplification of signal from unattached kinetochores via a MAD2 inhibitory signal	Amplification of signal from unattached kinetochores via a MAD2 inhibitory signal	Cell Cycle
843	tgf beta signaling pathway	Signaling by TGF-beta Receptor Complex	Differentiation		117	Amplification of signal from unattached kinetochores via a MAD2 inhibitory signal	Amplification of signal from unattached kinetochores via a MAD2 inhibitory signal	Cell Cycle													1118	Trk receptor signaling mediated by the MAPK pathway	Negative regulation of MAPK pathway	Trafficking/Signaling		852	MyD88 cascade initiated on plasma membrane	MyD88 cascade initiated on plasma membrane	Immunity		1223	Asparagine N-linked glycosylation	Asparagine N-linked glycosylation	Metabolism		102	antisense pathway	Small interfering RNA (siRNA) biogenesis	Ribosome			768	RNA Polymerase III Transcription Initiation From Type 2 Promoter	RNA Polymerase III Transcription Initiation From Type 2 Promoter	DNA
644	TGF-beta receptor signaling	Signaling by TGF-beta Receptor Complex	Differentiation		1316	hop pathway in cardiac development	HSP90 chaperone cycle for steroid hormone receptors (SHR) in the presence of ligand	Trafficking/Signaling													138	role of ran in mitotic spindle regulation	Mitotic Spindle Checkpoint	Cell Cycle		575	Epidermal Growth Factor Receptor EGFR signaling	Signaling by EGFR	Trafficking/Signaling		1316	hop pathway in cardiac development	HSP90 chaperone cycle for steroid hormone receptors (SHR) in the presence of ligand	Trafficking/Signaling		689	Destabilization of mRNA by AUF1 hnRNP D0	AUF1 (hnRNP D0) binds and destabilizes mRNA	Ribosome			1278	Resolution of AP sites via the multiple-nucleotide patch replacement pathway	Resolution of AP sites via the multiple-nucleotide patch replacement pathway	DNA
120	HIF-2-alpha transcription factor network	Cellular response to heat stress	Hypoxia		749	Regulation of Glucokinase by Glucokinase Regulatory Protein	Regulation of Glucokinase by Glucokinase Regulatory Protein	Metabolism													162	Integration of energy metabolism	Integration of energy metabolism	Metabolism		698	Fibroblast Growth Factor Receptor FGFR signaling	Signaling by FGFR1	Trafficking/Signaling		977	Signaling by FGFR mutants	Signaling by FGFR	Trafficking/Signaling		358	Processing of Intronless Pre-mRNAs	Processing of Intronless Pre-mRNAs	Ribosome			312	RAF activation	RAF activation	Trafficking/Signaling
818	Hypoxic and oxygen homeostasis regulation of HIF-1-alpha	Cellular response to heat stress	Hypoxia		1199	Clearance of Nuclear Envelope Membranes from Chromatin	Nuclear Envelope Breakdown	Nuclear													469	p38MAPK events	p38MAPK events	Trafficking/Signaling		620	S6K1-mediated signalling	mTORC1-mediated signalling	Amino Acids		698	Fibroblast Growth Factor Receptor FGFR signaling	Signaling by FGFR	Trafficking/Signaling		905	Netrin-1 signaling	Netrin-1 signaling	Trafficking/Signaling			793	SEMA3A-Plexin repulsion signaling by inhibiting Integrin adhesion	SEMA3A-Plexin repulsion signaling by inhibiting Integrin adhesion	Trafficking/Signaling
1201	Mitotic Prometaphase	Mitotic Prophase	Cell Cycle		637	Transport to the Golgi and subsequent modification	Transport to the Golgi and subsequent modification	Trafficking/Signaling													531	Synthesis of PC	Synthesis of PC	Metabolism		621	S6K1 signalling	mTORC1-mediated signalling	Amino Acids		97	E2F transcription factor network	Transcriptional Regulation by E2F6	DNA		1149	CTLA4 inhibitory signaling	CTLA4 inhibitory signaling	Trafficking/Signaling			941	AMPK inhibits chREBP transcriptional activation activity	AMPK inhibits chREBP transcriptional activation activity	DNA
1003	COPI Mediated Transport	COPI-mediated anterograde transport	Trafficking/Signaling		368	Glycolysis	Glycolysis	Metabolism													740	activated TAK1 mediates p38 MAPK activation	activated TAK1 mediates p38 MAPK activation	Trafficking/Signaling		1023	Tight junction interactions	Tight junction interactions	Adhesion		1290	Switching of origins to a post-replicative state	Switching of origins to a post-replicative state	DNA		1349	basic mechanisms of sumoylation	SUMOylation of ubiquitinylation proteins	Nuclear			770	RNA Polymerase III Transcription Initiation From Type 1 Promoter	RNA Polymerase III Transcription Initiation From Type 1 Promoter	DNA
1185	ABC-family proteins mediated transport	ABC-family proteins mediated transport	Trafficking/Signaling		1349	basic mechanisms of sumoylation	SUMOylation of DNA damage response and repair proteins	Nuclear													1092	ISG15 antiviral mechanism	ISG15 antiviral mechanism	Immunity		305	TRAF6 mediated induction of NFkB and MAP kinases upon TLR7/8 or 9 activation	TRAF6 mediated induction of NFkB and MAP kinases upon TLR7/8 or 9 activation	Immunity		90	TGF-beta receptor signaling in EMT epithelial to mesenchymal transition	Signaling by TGFB family members	Trafficking/Signaling		50	Apoptotic cleavage of cellular proteins	Apoptotic cleavage of cell adhesion proteins	Apoptotic			646	Spry regulation of FGF signaling	Spry regulation of FGF signaling	Trafficking/Signaling
998	a4b7 Integrin signaling	Integrin cell surface interactions	Adhesion		77	Signaling events mediated by HDAC Class I	SUMOylation of DNA damage response and repair proteins	Nuclear													1007	Assembly of the ORC complex at the origin of replication	Assembly of the ORC complex at the origin of replication	DNA		306	MyD88 dependent cascade initiated on endosome	MyD88 dependent cascade initiated on endosome	Immunity		644	TGF-beta receptor signaling	Signaling by TGFB family members	Trafficking/Signaling		872	Signaling by FGFR2 amplification mutants	Signaling by FGFR2	Trafficking/Signaling			1092	ISG15 antiviral mechanism	ISG15 antiviral mechanism	Immunity
708	a6b1 and a6b4 Integrin signaling	Integrin cell surface interactions	Adhesion		138	role of ran in mitotic spindle regulation	Mitotic Spindle Checkpoint	Cell Cycle													1233	Linoleic acid LA metabolism	Linoleic acid (LA) metabolism	Metabolism		785	Kinesins	Kinesins	Cell Cycle		201	Signalling to ERK5	Signalling to ERKs	Trafficking/Signaling		913	Cohesin Loading onto Chromatin	Cohesin Loading onto Chromatin	DNA			182	Beta oxidation of octanoyl-CoA to hexanoyl-CoA	Beta oxidation of octanoyl-CoA to hexanoyl-CoA	Metabolism
716	amb2 Integrin signaling	Integrin cell surface interactions	Adhesion		417	Deadenylation of mRNA	Deadenylation of mRNA	Ribosome													102	antisense pathway	Small interfering RNA (siRNA) biogenesis	Ribosome		300	Toll Like Receptor 7/8 TLR7/8 Cascade	Toll Like Receptor 7/8 (TLR7/8) Cascade	Immunity		1104	p38 signaling mediated by MAPKAP kinases	Signalling to ERKs	Trafficking/Signaling		1330	Apoptotic cleavage of cell adhesion proteins	Apoptotic cleavage of cell adhesion proteins	Apoptotic			129	Eicosanoid ligand-binding receptors	Eicosanoid ligand-binding receptors	Trafficking/Signaling
307	Beta2 integrin cell surface interactions	Integrin cell surface interactions	Adhesion		1259	Eukaryotic Translation Termination	Eukaryotic Translation Termination	Ribosome													764	Formation of transcription-coupled NER TC-NER repair complex	Formation of TC-NER Pre-Incision Complex	DNA		1225	Synthesis of UDP-N-acetyl-glucosamine	Synthesis of UDP-N-acetyl-glucosamine	Metabolism		674	gata3 participate in activating the th2 cytokine genes expression	Cytokine Signaling in Immune system	Immunity		698	Fibroblast Growth Factor Receptor FGFR signaling	Signaling by FGFR2	Trafficking/Signaling			356	Thromboxane signalling through TP receptor	Thromboxane signalling through TP receptor	Trafficking/Signaling
989	Integrin alphaIIb beta3 signaling	Integrin cell surface interactions	Adhesion		1349	basic mechanisms of sumoylation	SUMOylation of chromatin organization proteins	Nuclear													120	HIF-2-alpha transcription factor network	Cellular response to chemical stress	Hypoxia		986	ADP signalling through P2Y purinoceptor 1	ADP signalling through P2Y purinoceptor 1	Trafficking/Signaling		741	ERK activation	Prolonged ERK activation events	Trafficking/Signaling		1350	EPO signaling pathway	Erythropoietin activates RAS	Trafficking/Signaling			985	Thrombin signalling through proteinase activated receptors (PARs)	Thrombin signalling through proteinase activated receptors (PARs)	Trafficking/Signaling
505	Integrin cell surface interactions	Integrin cell surface interactions	Adhesion		77	Signaling events mediated by HDAC Class I	SUMOylation of chromatin organization proteins	Nuclear													818	Hypoxic and oxygen homeostasis regulation of HIF-1-alpha	Cellular response to chemical stress	Hypoxia		246	Toll Like Receptor 9 TLR9 Cascade	Toll Like Receptor 9 (TLR9) Cascade	Immunity		330	FOXA1 transcription factor network	Nuclear Events (kinase and transcription factor activation)	Nuclear		495	Processing of DNA double-strand break ends	Processing of DNA double-strand break ends	DNA			940	NOSTRIN mediated eNOS trafficking	NOSTRIN mediated eNOS trafficking	Trafficking/Signaling
38	Osteopontin-mediated events	Integrin cell surface interactions	Adhesion		192	aspirin blocks signaling pathway involved in platelet activation	Platelet activation, signaling and aggregation	Adhesion													924	hypoxia and p53 in the cardiovascular system	Cellular response to chemical stress	Hypoxia		55	Release of apoptotic factors from the mitochondria	Release of apoptotic factors from the mitochondria	Apoptotic		1030	ctcf first multivalent nuclear factor	Nuclear Events (kinase and transcription factor activation)	Nuclear		193	Lissencephaly gene LIS1 in neuronal migration and development	Neuronal System	Differentiation			571	Signal attenuation	Signal attenuation	Trafficking/Signaling
74	RhoA signaling pathway	RHOA GTPase cycle	Cell Cycle		1099	Regulation of PLK1 Activity at G2/M Transition	Regulation of PLK1 Activity at G2/M Transition	Cell Cycle													361	Creatine metabolism	Creatine metabolism	Metabolism		149	Iron uptake and transport	Iron uptake and transport	Trafficking/Signaling		872	Signaling by FGFR2 amplification mutants	Signaling by FGFR2	Trafficking/Signaling		929	DNA-PK pathway in nonhomologous end joining	Nonhomologous End-Joining (NHEJ)	DNA			417	Deadenylation of mRNA	Deadenylation of mRNA	Ribosome
415	ATM mediated phosphorylation of repair proteins	DNA Repair	DNA		1102	Recruitment of NuMA to mitotic centrosomes	Recruitment of NuMA to mitotic centrosomes	Cell Cycle													489	Gap junction degradation	Gap junction degradation	Trafficking/Signaling		539	Vitamin C ascorbate metabolism	Vitamin C (ascorbate) metabolism	Metabolism		1099	Regulation of PLK1 Activity at G2/M Transition	Regulation of PLK1 Activity at G2/M Transition	Cell Cycle		499	Presynaptic phase of homologous DNA pairing and strand exchange	Presynaptic phase of homologous DNA pairing and strand exchange	DNA			1091	Regulation of IFNG signaling	Regulation of IFNG signaling	Trafficking/Signaling
411	ATM mediated response to DNA double-strand break	DNA Repair	DNA		1197	Loss of Nlp from mitotic centrosomes	Loss of Nlp from mitotic centrosomes	Cell Cycle													1091	Regulation of IFNG signaling	Regulation of IFNG signaling	Immunity		1027	MAP kinase activation	MAP kinase activation	Trafficking/Signaling		739	CREB phosphorylation	CREB phosphorylation	Trafficking/Signaling		1147	CD28 dependent PI3K/Akt signaling	CD28 dependent PI3K/Akt signaling	Trafficking/Signaling			402	p53-Independent DNA Damage Response	p53-Independent DNA Damage Response	DNA
968	Crosslinking of collagen fibrils	Crosslinking of collagen fibrils	Adhesion		1101	Loss of proteins required for interphase microtubule organization from the centrosome	Loss of proteins required for interphase microtubule organization from the centrosome	Cell Cycle													1186	Interleukin-6 signaling	Interleukin-6 signaling	Immunity		904	DCC mediated attractive signaling	DCC mediated attractive signaling	Adhesion		1101	Loss of proteins required for interphase microtubule organization from the centrosome	Loss of proteins required for interphase microtubule organization from the centrosome	DNA		620	S6K1-mediated signalling	mTORC1-mediated signalling	Amino Acids			403	Ubiquitin Mediated Degradation of Phosphorylated Cdc25A	Ubiquitin Mediated Degradation of Phosphorylated Cdc25A	Cell Cycle
903	NCAM signaling for neurite out-growth	NCAM signaling for neurite out-growth	Adhesion		358	Processing of Intronless Pre-mRNAs	Processing of Capped Intronless Pre-mRNA	Ribosome													1330	Apoptotic cleavage of cell adhesion proteins	Apoptotic cleavage of cell adhesion proteins	Apoptotic		964	Molecules associated with elastic fibres	Molecules associated with elastic fibres	Adhesion		1197	Loss of Nlp from mitotic centrosomes	Loss of Nlp from mitotic centrosomes	Cell Cycle		621	S6K1 signalling	mTORC1-mediated signalling	Amino Acids			1283	ABC transporters in lipid homeostasis	ABC transporters in lipid homeostasis	Metabolism
1349	basic mechanisms of sumoylation	SUMOylation	Nuclear		58	L1CAM interactions	L1CAM interactions	Adhesion													399	G2/M DNA damage checkpoint	G2/M DNA damage checkpoint	Cell Cycle		1000	Lysosome Vesicle Biogenesis	Lysosome Vesicle Biogenesis	Trafficking/Signaling		903	NCAM signaling for neurite out-growth	NCAM signaling for neurite out-growth	Differentiation		245	EPHA2 forward signaling	EPH-Ephrin signaling	Trafficking/Signaling			181	Beta oxidation of decanoyl-CoA to octanoyl-CoA-CoA	Beta oxidation of decanoyl-CoA to octanoyl-CoA-CoA	Metabolism
748	Glucose transport	Glucose metabolism	Metabolism		736	Aurora A signaling	AURKA Activation by TPX2	Trafficking/Signaling													149	Iron uptake and transport	Iron uptake and transport	Metabolism		657	Negative regulation of the PI3K/AKT network	Negative regulation of the PI3K/AKT network	Trafficking/Signaling		766	Adherens junctions interactions	Adherens junctions interactions	Adhesion		901	EphrinA-EPHA pathway	EPH-Ephrin signaling	Trafficking/Signaling			109	The NLRP3 inflammasome	The NLRP3 inflammasome
801	oxidative stress induced gene expression via nrf2	Oxidative Stress Induced Senescence	Hypoxia		784	Factors involved in megakaryocyte development and platelet production	Factors involved in megakaryocyte development and platelet production	Adhesion													1215	AKT phosphorylates targets in the nucleus	AKT phosphorylates targets in the nucleus	Trafficking/Signaling		529	Synthesis of PA	Synthesis of PA	Metabolism		953	Stabilization and expansion of the E-cadherin adherens junction	Adherens junctions interactions	Adhesion		988	Transport of Mature mRNA Derived from an Intronless Transcript	Transport of Mature mRNA Derived from an Intronless Transcript	Ribosome			60	Recycling pathway of L1	Recycling pathway of L1	Adhesion
969	Collagen biosynthesis and modifying enzymes	Collagen chain trimerization	Adhesion		1100	Recruitment of mitotic centrosome proteins and complexes	Recruitment of mitotic centrosome proteins and complexes	Cell Cycle													151	Transferrin endocytosis and recycling	Transferrin endocytosis and recycling	Trafficking/Signaling		553	Activation of Na-permeable Kainate Receptors	Activation of NMDA receptors and postsynaptic events	Trafficking/Signaling		1351	Posttranslational regulation of adherens junction stability and dissassembly	Adherens junctions interactions	Adhesion		1101	Loss of proteins required for interphase microtubule organization from the centrosome	Loss of proteins required for interphase microtubule organization from the centrosome	Cell Cycle			878	Gap-filling DNA repair synthesis and ligation in GG-NER	Gap-filling DNA repair synthesis and ligation in GG-NER	DNA
1171	Translation initiation complex formation	Translation	Ribosome		785	Kinesins	Kinesins	Cell Cycle													407	Endosomal Sorting Complex Required For Transport ESCRT	Endosomal Sorting Complex Required For Transport (ESCRT)	Trafficking/Signaling		354	GPVI-mediated activation cascade	GPVI-mediated activation cascade	Trafficking/Signaling		1100	Recruitment of mitotic centrosome proteins and complexes	Recruitment of mitotic centrosome proteins and complexes	Cell Cycle		1197	Loss of Nlp from mitotic centrosomes	Loss of Nlp from mitotic centrosomes	Cell Cycle			1101	Loss of proteins required for interphase microtubule organization from the centrosome	Loss of proteins required for interphase microtubule organization from the centrosome	Cell Cycle
242	TRAF6 mediated IRF7 activation in TLR7/8 or 9 signaling	Toll-like Receptor Cascades	Immunity		369	Gluconeogenesis	Gluconeogenesis	Metabolism													453	Purine ribonucleoside monophosphate biosynthesis	Purine ribonucleoside monophosphate biosynthesis	Metabolism		453	Purine ribonucleoside monophosphate biosynthesis	Purine ribonucleoside monophosphate biosynthesis	Metabolism		60	Recycling pathway of L1	Recycling pathway of L1	Adhesion		411	ATM mediated response to DNA double-strand break	DNA Double-Strand Break Repair	DNA			1197	Loss of Nlp from mitotic centrosomes	Loss of Nlp from mitotic centrosomes	Cell Cycle
263	Cholesterol biosynthesis	Cholesterol biosynthesis	Metabolism		999	Golgi Associated Vesicle Biogenesis	Golgi Associated Vesicle Biogenesis	Trafficking/Signaling													473	Signalling to RAS	Signalling to RAS	Trafficking/Signaling		787	Dissolution of Fibrin Clot	Dissolution of Fibrin Clot	Adhesion		877	DNA Damage Recognition in GG-NER	DNA Damage Recognition in GG-NER	DNA		5	Establishment of Sister Chromatid Cohesion	Establishment of Sister Chromatid Cohesion	DNA			233	PLC beta mediated events	PLC beta mediated events	Trafficking/Signaling
1104	p38 signaling mediated by MAPKAP kinases	Signalling to ERKs	Trafficking/Signaling		50	Apoptotic cleavage of cellular proteins	Apoptotic cleavage of cellular proteins	Apoptotic													914	Mitotic Telophase/Cytokinesis	Mitotic Telophase/Cytokinesis	Cell Cycle		291	Signaling by SCF-KIT	Signaling by SCF-KIT	Trafficking/Signaling		5	Establishment of Sister Chromatid Cohesion	Establishment of Sister Chromatid Cohesion	DNA		1148	CD28 dependent Vav1 pathway	CD28 dependent Vav1 pathway	Trafficking/Signaling			1040	Glutathione conjugation	Glutathione conjugation	Metabolism
201	Signalling to ERK5	Signalling to ERKs	Trafficking/Signaling		60	Recycling pathway of L1	Recycling pathway of L1	ADhesion													916	Condensation of Prometaphase Chromosomes	Condensation of Prophase Chromosomes	DNA		312	RAF activation	RAF activation	Trafficking/Signaling		367	GP1b-IX-V activation signalling	GP1b-IX-V activation signalling	Trafficking/Signaling		197	Downstream signal transduction	Downstream signal transduction	Trafficking/Signaling			795	Sema4D mediated inhibition of cell attachment and migration	Sema4D mediated inhibition of cell attachment and migration	Adhesion
470	Signalling to p38 via RIT and RIN	Signalling to ERKs	Trafficking/Signaling		872	Signaling by FGFR2 amplification mutants	Signaling by FGFR2	Trafficking/Signaling													938	eNOS activation	eNOS activation	Trafficking/Signaling		500	Signaling by Type 1 Insulin-like Growth Factor 1 Receptor IGF1R	Signaling by Insulin receptor	Trafficking/Signaling		712	S1P3 pathway	RHO GTPases activate PKNs	Trafficking/Signaling		1290	Switching of origins to a post-replicative state	Switching of origins to a post-replicative state	DNA			568	ER-Phagosome pathway	ER-Phagosome pathway	Trafficking/Signaling
1031	bcr signaling pathway	Signaling by the B Cell Receptor (BCR)	Trafficking/Signaling		231	DARPP-32 events	DARPP-32 events														58	L1CAM interactions	L1CAM interactions	Adhesion		938	eNOS activation	eNOS activation	Trafficking/Signaling		1027	MAP kinase activation	MAP kinase activation	Trafficking/Signaling		115	Cyclin D associated events in G1	Cyclin D associated events in G1	Cell Cycle			612	Stabilization of p53	Stabilization of p53	Trafficking/Signaling
843	tgf beta signaling pathway	Signaling by TGFB family members	Adhesion		886	RNA Polymerase I Transcription Initiation	RNA Polymerase I Transcription Initiation	Ribosome													918	Separation of Sister Chromatids	Separation of Sister Chromatids	DNA		110	Inflammasomes	Inflammasomes	Immunity		775	RNA Polymerase II Transcription Pre-Initiation And Promoter Opening	RNA Polymerase II Transcription Pre-Initiation And Promoter Opening	Ribosome		1221	cdk regulation of dna replication	DNA Replication	DNA			1148	CD28 dependent Vav1 pathway	CD28 dependent Vav1 pathway	Trafficking/Signaling
644	TGF-beta receptor signaling	Signaling by TGFB family members	Adhesion		276	Branched-chain amino acid catabolism	Branched-chain amino acid catabolism	Metabolism													657	Negative regulation of the PI3K/AKT network	Negative regulation of the PI3K/AKT network	Trafficking/Signaling		722	Methylation	Methylation	Metabolism		780	RNA Polymerase II Transcription Initiation	RNA Polymerase II Transcription Initiation	Ribosome		201	Signalling to ERK5	Signalling to ERKs	Trafficking/Signaling			1156	Signaling by BMP	Signaling by BMP	Trafficking/Signaling
436	the igf-1 receptor and longevity	Signaling by Insulin receptor	Adhesion		980	Signaling by activated point mutants of FGFR1	Signaling by FGFR	Trafficking/Signaling													792	Sema4D in semaphorin signaling	Sema4D in semaphorin signaling	Trafficking/Signaling		168	Glycosphingolipid metabolism	Glycosphingolipid metabolism	Metabolism		781	RNA Polymerase II Promoter Escape	RNA Polymerase II Promoter Escape	Ribosome		1152	Effects of PIP2 hydrolysis	Effects of PIP2 hydrolysis	Trafficking/Signaling			1368	Signaling by BMP	Signaling by BMP	Trafficking/Signaling
368	Glycolysis	Glycolysis	Metabolism		698	Fibroblast Growth Factor Receptor FGFR signaling	Signaling by FGFR	Trafficking/Signaling													948	Heme biosynthesis	Heme biosynthesis	Metabolism		1317	Downstream signaling in na ve CD8 T cells	Downstream signaling events of B Cell Receptor (BCR)	Immunity		929	DNA-PK pathway in nonhomologous end joining	Nonhomologous End-Joining (NHEJ)	DNA		1223	Asparagine N-linked glycosylation	Asparagine N-linked glycosylation	Metabolism			778	RNA Pol II CTD phosphorylation and interaction with CE	RNA Pol II CTD phosphorylation and interaction with CE	DNA
60	Recycling pathway of L1	Recycling pathway of L1	Trafficking/Signaling		1342	Smooth Muscle Contraction	Smooth Muscle Contraction	Trafficking/Signaling													990	GRB2:SOS provides linkage to MAPK signaling for Integrins	GRB2:SOS provides linkage to MAPK signaling for Integrins	Adhesion		75	IGF1 pathway	IGF1R signaling cascade	Insulin		468	Frs2-mediated activation	Frs2-mediated activation	Trafficking/Signaling		1104	p38 signaling mediated by MAPKAP kinases	Signalling to ERKs	Trafficking/Signaling			1102	Recruitment of NuMA to mitotic centrosomes	Recruitment of NuMA to mitotic centrosomes	Cell Cycle
415	ATM mediated phosphorylation of repair proteins	DNA Double-Strand Break Repair	DNA		490	Microtubule-dependent trafficking of connexons from Golgi to the plasma membrane	Microtubule-dependent trafficking of connexons from Golgi to the plasma membrane	Trafficking/Signaling													1228	alpha-linolenic acid ALA metabolism	alpha-linolenic acid (ALA) metabolism	Metabolism		968	Crosslinking of collagen fibrils	Crosslinking of collagen fibrils	Adhesion		956	Telomere C-strand synthesis initiation	Telomere C-strand synthesis initiation	DNA		1244	PLC-mediated hydrolysis of PIP2	Effects of PIP2 hydrolysis	Metabolism			1186	Interleukin-6 signaling	Interleukin-6 signaling	Immunity
411	ATM mediated response to DNA double-strand break	DNA Double-Strand Break Repair	DNA		646	Spry regulation of FGF signaling	Spry regulation of FGF signaling	Trafficking/Signaling													1326	Synthesis of PIPs at the early endosome membrane	Synthesis of PIPs at the early endosome membrane	Trafficking/Signaling		385	Syndecan-4-mediated signaling events	Syndecan interactions	Adhesion		1081	Toll Like Receptor 4 (TLR4) Cascade	Toll Like Receptor 4 (TLR4) Cascade	Immunity		1366	Nuclear signaling by ERBB4	Nuclear signaling by ERBB4	Trafficking/Signaling			1179	Signaling by NOTCH3	Signaling by NOTCH3	Trafficking/Signaling
1311	rb tumor suppressor/checkpoint signaling in response to dna damage	DNA Double-Strand Break Repair	DNA		24	sprouty regulation of tyrosine kinase signals	Spry regulation of FGF signaling	Trafficking/Signaling													801	oxidative stress induced gene expression via nrf2	Oxidative Stress Induced Senescence	Hypoxia		1079	Syndecan-3-mediated signaling events	Syndecan interactions	Adhesion		661	LKB1 signaling events	Energy dependent regulation of mTOR by LKB1-AMPK	Amino Acids		1199	Clearance of Nuclear Envelope Membranes from Chromatin	Nuclear Envelope Breakdown	Nuclear			1289	Orc1 removal from chromatin	Orc1 removal from chromatin	DNA
741	ERK activation	Prolonged ERK activation events	Kinase		717	Wnt signaling network	Wnt signaling pathway	WNT													440	Acyl chain remodelling of PI	Acyl chain remodelling of PI	Metabolism		1297	Syndecan-2-mediated signaling events	Syndecan interactions	Adhesion		1043	Autodegradation of Cdh1 by Cdh1:APC/C	Autodegradation of Cdh1 by Cdh1:APC/C	Cell Cycle		895	mRNA Splicing - Minor Pathway	mRNA Splicing - Minor Pathway	Ribosome			1235	Synthesis of 5-eicosatetraenoic acids	Synthesis of 5-eicosatetraenoic acids	Immunity
656	Insulin receptor recycling	Insulin receptor recycling	Insulin		958	Telomere Extension By Telomerase	Telomere Extension By Telomerase	DNA													968	Crosslinking of collagen fibrils	Crosslinking of collagen fibrils	Adhesion		441	Acyl chain remodelling of PG	Acyl chain remodelling of PG	Metabolism		959	Telomere C-strand Lagging Strand Synthesis	Telomere C-strand (Lagging Strand) Synthesis	DNA		698	Fibroblast Growth Factor Receptor FGFR signaling	Signaling by FGFR	Trafficking/Signaling			913	Cohesin Loading onto Chromatin	Cohesin Loading onto Chromatin	DNA
46	Regulation of Insulin Secretion	Regulation of insulin secretion	Insulin		984	SLBP independent Processing of Histone Pre-mRNAs	SLBP independent Processing of Histone Pre-mRNAs	Ribosome													1155	p130Cas linkage to MAPK signaling for integrins	p130Cas linkage to MAPK signaling for integrins	Adhesion		115	Cyclin D associated events in G1	Cyclin D associated events in G1	Cell Cycle		246	Toll Like Receptor 9 TLR9 Cascade	Toll Like Receptor 9 (TLR9) Cascade	Immunity		196	Signaling by PDGF	Signaling by PDGF	Trafficking/Signaling			473	Signalling to RAS	Signalling to RAS	Trafficking/Signaling
47	Regulation of Insulin Secretion by Acetylcholine	Regulation of insulin secretion	Insulin		1379	akap95 role in mitosis and chromosome dynamics	Chromosome Maintenance	DNA													321	G alpha 12/13 signalling events	G alpha (12/13) signalling events	Trafficking/Signaling							90	TGF-beta receptor signaling in EMT epithelial to mesenchymal transition	Signaling by TGF-beta Receptor Complex	Trafficking/Signaling		290	Regulation of KIT signaling	Regulation of KIT signaling	Trafficking/Signaling			887	RNA Polymerase I Transcription Termination	RNA Polymerase I Transcription Termination	DNA
42	Regulation of Insulin Secretion by Fatty Acids Bound to GPR40 FFAR1	Regulation of insulin secretion	Insulin		1385	Toll Like Receptor TLR6:TLR2 Cascade	Toll Like Receptor TLR6:TLR2 Cascade	Immunity													1345	agrin in postsynaptic differentiation	Cargo trafficking to the periciliary membrane	Trafficking/Signaling							232	Gastrin-CREB signalling pathway via PKC and MAPK	Gastrin-CREB signalling pathway via PKC and MAPK	Trafficking/Signaling		1329	Caspase-mediated cleavage of cytoskeletal proteins	Caspase-mediated cleavage of cytoskeletal proteins	Apoptotic			892	mRNA Capping	mRNA Capping	Ribosome
41	Regulation of Insulin Secretion by Glucagon-like Peptide-1	Regulation of insulin secretion	Insulin		852	MyD88 cascade initiated on plasma membrane	MyD88 cascade initiated on plasma membrane	Immunity													944	nf-kb signaling pathway	p75NTR signals via NF-kB	Immunity							999	Golgi Associated Vesicle Biogenesis	Golgi Associated Vesicle Biogenesis	Trafficking/Signaling		999	Golgi Associated Vesicle Biogenesis	Golgi Associated Vesicle Biogenesis	Trafficking/Signaling			1039	Glutathione synthesis and recycling	Glutathione synthesis and recycling	Metabolism
399	G2/M DNA damage checkpoint	G2/M DNA damage checkpoint	Cell Cycle		847	Toll Like Receptor 10 (TLR10) Cascade	Toll Like Receptor 10 (TLR10) Cascade	Immunity													487	Gap junction assembly	Gap junction trafficking	Trafficking/Signaling							358	Processing of Intronless Pre-mRNAs	Processing of Capped Intronless Pre-mRNA	Ribosome		657	Negative regulation of the PI3K/AKT network	Negative regulation of the PI3K/AKT network	Trafficking/Signaling			232	Gastrin-CREB signalling pathway via PKC and MAPK	Gastrin-CREB signalling pathway via PKC and MAPK	Trafficking/Signaling
65	Signal transduction by L1	Signal transduction by L1	Adhesion		301	Toll Like Receptor 5 TLR5 Cascade	Toll Like Receptor 5 (TLR5) Cascade	Immunity													503	Beta-catenin phosphorylation cascade	Beta-catenin phosphorylation cascade	WNT							1282	Transport of inorganic cations/anions and amino acids/oligopeptides	Transport of inorganic cations/anions and amino acids/oligopeptides	Trafficking/Signaling		1185	ABC-family proteins mediated transport	ABC-family proteins mediated transport	Trafficking/Signaling			1182	Cleavage of the damaged purine	Cleavage of the damaged purine	Metabolism
1196	Golgi Cisternae Pericentriolar Stack Reorganization	Golgi Cisternae Pericentriolar Stack Reorganization	Trafficking/Signaling		203	Toll Like Receptor TLR1 TLR2 Cascade	Toll Like Receptor TLR1:TLR2 Cascade	Immunity																							1289	Orc1 removal from chromatin	Orc1 removal from chromatin	DNA		1053	double stranded rna induced gene expression	DNA Double Strand Break Response	DNA			310	Trafficking of GluR2-containing AMPA receptors	Trafficking of GluR2-containing AMPA receptors	Trafficking/Signaling
909	Signaling by Robo receptor	Signaling by ROBO receptors	Differentiation		647	Negative regulation of FGFR signaling	Negative regulation of FGFR1 signaling	Trafficking/Signaling																							159	visceral fat deposits and the metabolic syndrome	TP53 Regulates Metabolic Genes	Nuclear		738	ERKs are inactivated	ERKs are inactivated	Trafficking/Signaling			1166	Stimuli-sensing channels	Stimuli-sensing channels	Trafficking/Signaling
1081	Toll Like Receptor 4 (TLR4) Cascade	Toll Like Receptor 4 (TLR4) Cascade	Immunity		305	TRAF6 mediated induction of NFkB and MAP kinases upon TLR7/8 or 9 activation	TRAF6 mediated induction of NFkB and MAP kinases upon TLR7/8 or 9 activation	Immunity																							1349	basic mechanisms of sumoylation	SUMOylation of transcription factors	Nuclear		162	Integration of energy metabolism	Integration of energy metabolism	Metabolism			1100	Recruitment of mitotic centrosome proteins and complexes	Recruitment of mitotic centrosome proteins and complexes	Cell Cycle
1349	basic mechanisms of sumoylation	SUMOylation of DNA replication proteins	Nuclear		1231	Synthesis of Prostaglandins PG and Thromboxanes TX	Synthesis of Prostaglandins (PG) and Thromboxanes (TX)	Immunity																							576	Formation of the Early Elongation Complex	Formation of the Early Elongation Complex	DNA		647	Negative regulation of FGFR signaling	Negative regulation of FGFR1 signaling	Trafficking/Signaling			885	RNA Polymerase I Promoter Escape	RNA Polymerase I Promoter Escape	DNA
762	Gap-filling DNA repair synthesis and ligation in TC-NER	Gap-filling DNA repair synthesis and ligation in TC-NER	DNA		306	MyD88 dependent cascade initiated on endosome	MyD88 dependent cascade initiated on endosome	Trafficking/Signaling																							712	S1P3 pathway	RHO GTPases Activate WASPs and WAVEs	Trafficking/Signaling		444	TCR signaling in na ve CD4 T cells	TCR signaling	Immunity			1282	Transport of inorganic cations/anions and amino acids/oligopeptides	Transport of inorganic cations/anions and amino acids/oligopeptides	Amino acids
988	Transport of Mature mRNA Derived from an Intronless Transcript	Transport of Mature mRNA Derived from an Intronless Transcript	Ribosome		186	Beta oxidation of lauroyl-CoA to decanoyl-CoA-CoA	Biological oxidations	Metabolism																							785	Kinesins	Kinesins	Cell Cycle		1015	TCR signaling in na ve CD8 T cells	TCR signaling	Immunity			1175	Pre-NOTCH Processing in Golgi	Pre-NOTCH Processing in Golgi	Trafficking/Signaling
902	NCAM1 interactions	NCAM1 interactions	Adhesion		185	Beta oxidation of palmitoyl-CoA to myristoyl-CoA	Biological oxidations	Metabolism																							1288	CDK-mediated phosphorylation and removal of Cdc6	CDK-mediated phosphorylation and removal of Cdc6	Cell Cycle		187	JNK signaling in the CD4 TCR pathway	TCR signaling	Immunity			303	IKK complex recruitment mediated by RIP1	IKK complex recruitment mediated by RIP1	Immunity
468	Frs2-mediated activation	Frs2-mediated activation	Trafficking/Signaling		184	Beta oxidation of butanoyl-CoA to acetyl-CoA	Biological oxidations	Metabolism																							114	G0 and Early G1	G0 and Early G1	Cell Cycle		790	CRMPs in Sema3A signaling	CRMPs in Sema3A signaling	Trafficking/Signaling			1286	Leading Strand Synthesis	Leading Strand Synthesis	DNA
195	Retrograde neurotrophin signalling	Retrograde transport at the Trans-Golgi-Network	Trafficking/Signaling		183	Beta oxidation of hexanoyl-CoA to butanoyl-CoA	Biological oxidations	Metabolism																							1022	Cell-extracellular matrix interactions	Cell-extracellular matrix interactions	Adhesion		142	Degradation of beta catenin	Degradation of beta-catenin by the destruction complex	WNT			1293	Polymerase switching	Polymerase switching	DNA
988	Transport of Mature mRNA Derived from an Intronless Transcript	Transport of Mature mRNAs Derived from Intronless Transcripts	Ribosome		182	Beta oxidation of octanoyl-CoA to hexanoyl-CoA	Biological oxidations	Metabolism																							688	Destabilization of mRNA by Butyrate Response Factor 1 BRF1	Butyrate Response Factor 1 (BRF1) binds and destabilizes mRNA	Ribosome		504	Degradation of beta-catenin by the destruction complex	Degradation of beta-catenin by the destruction complex	WNT			1286	Leading Strand Synthesis	Leading Strand Synthesis	DNA
765	Dual incision reaction in TC-NER	Dual incision in TC-NER	DNA		181	Beta oxidation of decanoyl-CoA to octanoyl-CoA-CoA	Biological oxidations	Metabolism																							1173	Formation of the ternary complex and subsequently the 43S complex	Formation of the ternary complex, and subsequently, the 43S complex	Ribosome		963	Degradation of collagen	Degradation of beta-catenin by the destruction complex	WNT			613	Autodegradation of the E3 ubiquitin ligase COP1	Autodegradation of the E3 ubiquitin ligase COP1	Trafficking/Signaling
1199	Clearance of Nuclear Envelope Membranes from Chromatin	Nuclear Envelope Breakdown	Nuclear		722	Methylation	Methylation	Metabolism																							203	Toll Like Receptor TLR1 TLR2 Cascade	Toll Like Receptor TLR1:TLR2 Cascade	Immunity		576	Formation of the Early Elongation Complex	Formation of the Early Elongation Complex	DNA			552	Presynaptic function of Kainate receptors	Presynaptic function of Kainate receptors	Trafficking/Signaling
896	Transport of Mature mRNA derived from an Intron-Containing Transcript	Transport of Mature Transcript to Cytoplasm	Ribosome		300	Toll Like Receptor 7/8 TLR7/8 Cascade	Toll Like Receptor 7/8 (TLR7/8) Cascade	Immunity																							218	Activation of the pre-replicative complex	Activation of APC/C and APC/C:Cdc20 mediated degradation of mitotic proteins	Cell Cycle		497	MRN complex relocalizes to nuclear foci	Nuclear Pore Complex (NPC) Disassembly	Nuclear			614	p53-Dependent G1 DNA Damage Response	p53-Dependent G1 DNA Damage Response	Cell Cycle
364	Transport of the SLBP Dependant Mature mRNA	Transport of Mature Transcript to Cytoplasm	Ribosome		184	Beta oxidation of butanoyl-CoA to acetyl-CoA	Beta oxidation of butanoyl-CoA to acetyl-CoA	Metabolism																							301	Toll Like Receptor 5 TLR5 Cascade	Toll Like Receptor 5 (TLR5) Cascade	Immunity		222	Phosphorylation of proteins involved in G1/S transition by active Cyclin E Cdk2 complexes	Phosphorylation of proteins involved in G1/S transition by active Cyclin E:Cdk2 complexes	Cell Cycle			886	RNA Polymerase I Transcription Initiation	RNA Polymerase I Transcription Initiation	DNA
872	Signaling by FGFR2 amplification mutants	Signaling by FGFR2	Trafficking/Signaling		115	Cyclin D associated events in G1	Cyclin D associated events in G1	Cell Cycle																							847	Toll Like Receptor 10 (TLR10) Cascade	Toll Like Receptor 10 (TLR10) Cascade	Immunity		558	IRS activation	IRS activation	Insulin			639	Termination of O-glycan biosynthesis	Termination of O-glycan biosynthesis	Metabolism
825	VEGFR3 signaling in lymphatic endothelium	Signaling by FGFR2	Trafficking/Signaling		917	Initiation of Nuclear Envelope (NE) Reformation	Initiation of Nuclear Envelope (NE) Reformation	Nuclear																							852	MyD88 cascade initiated on plasma membrane	MyD88 cascade initiated on plasma membrane	Immunity		766	Adherens junctions interactions	Adherens junctions interactions	Adhesion			469	p38MAPK events	p38MAPK events	Trafficking/Signaling
184	Beta oxidation of butanoyl-CoA to acetyl-CoA	Biological oxidations	Metabolism		978	Signaling by FGFR1 amplification mutants	Signaling by FGFR1	Trafficking/Signaling																							1385	Toll Like Receptor TLR6:TLR2 Cascade	Toll Like Receptor TLR6:TLR2 Cascade	Immunity		1097	Phosphorylation of proteins involved in the G2/M transition by Cyclin A Cdc2 complexes	Phosphorylation of proteins involved in G1/S transition by active Cyclin E:Cdk2 complexes	Cell Cycle			1343	Oxygen-dependent proline hydroxylation of Hypoxia-inducible Factor Alpha	Oxygen-dependent proline hydroxylation of Hypoxia-inducible Factor Alpha	Hypoxa
181	Beta oxidation of decanoyl-CoA to octanoyl-CoA-CoA	Biological oxidations	Metabolism		977	Signaling by FGFR mutants	Signaling by FGFR1	Trafficking/Signaling																							65	Signal transduction by L1	Signal transduction by L1	Adhesion		953	Stabilization and expansion of the E-cadherin adherens junction	Adherens junctions interactions	Adhesion			425	DAG and IP3 signaling	DAG and IP3 signaling	Trafficking/Signaling
183	Beta oxidation of hexanoyl-CoA to butanoyl-CoA	Biological oxidations	Metabolism		698	Fibroblast Growth Factor Receptor FGFR signaling	Signaling by FGFR1	Trafficking/Signaling																							312	RAF activation	RAF activation	Trafficking/Signaling		646	Spry regulation of FGF signaling	Spry regulation of FGF signaling	Trafficking/Signaling			88	Downregulation of TGF-beta receptor signaling	Downregulation of TGF-beta receptor signaling	Adhesion
186	Beta oxidation of lauroyl-CoA to decanoyl-CoA-CoA	Biological oxidations	Metabolism		358	Processing of Intronless Pre-mRNAs	Processing of Intronless Pre-mRNAs	Ribosome																							370	Glycogen synthesis	Glycogen synthesis	Metabolism		1089	Interferon gamma signaling	Interferon gamma signaling	Immunity			1094	IRAK2 mediated activation of TAK1 complex upon TLR7/8 or 9 stimulation	IRAK2 mediated activation of TAK1 complex upon TLR7/8 or 9 stimulation	Immunity
182	Beta oxidation of octanoyl-CoA to hexanoyl-CoA	Biological oxidations	Metabolism		450	Purine salvage	Purine salvage	Metabolism																							685	Stabilization of mRNA by HuR	HuR (ELAVL1) binds and stabilizes mRNA	Ribosome		1009	Assembly of the pre-replicative complex	Assembly of the pre-replicative complex	DNA			297	Signaling by ERBB2	Signaling by ERBB2	Trafficking/Signaling
185	Beta oxidation of palmitoyl-CoA to myristoyl-CoA	Biological oxidations	Metabolism		1022	Cell-extracellular matrix interactions	Cell-extracellular matrix interactions	Adhesion																							1048	Conversion from APC/C Cdc20 to APC/C Cdh1 in late anaphase	Conversion from APC/C:Cdc20 to APC/C:Cdh1 in late anaphase	Cell Cycle		529	Synthesis of PA	Synthesis of PA	Metabolism			456	Synthesis of IPs in the nucleus	Synthesis of IPs in the nucleus	DNA
91	Downregulation of SMAD2/3 SMAD4 transcriptional activity	Downregulation of SMAD2/3:SMAD4 transcriptional activity	Trafficking/Signaling		657	Negative regulation of the PI3K/AKT network	Negative regulation of MAPK pathway	Negative regulation																							1051	Phosphorylation of the APC/C	Phosphorylation of the APC/C	Cell Cycle		987	Transport of the SLBP independent Mature mRNA	Transport of the SLBP independent Mature mRNA	Ribosome			1147	CD28 dependent PI3K/Akt signaling	CD28 dependent PI3K/Akt signaling	Trafficking/Signaling
415	ATM mediated phosphorylation of repair proteins	DNA Damage Bypass	DNA		487	Gap junction assembly	Gap junction assembly	Gap junction																							305	TRAF6 mediated induction of NFkB and MAP kinases upon TLR7/8 or 9 activation	TRAF6 mediated induction of NFkB and MAP kinases upon TLR7/8 or 9 activation	Immunity		1364	Signaling by ERBB4	Signaling by ERBB4	Trafficking/Signaling			1191	Interleukin receptor SHC signaling	Interleukin receptor SHC signaling	Trafficking/Signaling
845	PDGF receptor signaling network	Signaling by PDGF	Adhesion		1027	MAP kinase activation	MAP kinase activation	Trafficking/Signaling																							801	oxidative stress induced gene expression via nrf2	Oxidative Stress Induced Senescence	Hypoxia		1349	basic mechanisms of sumoylation	SUMOylation of SUMOylation proteins	Nuclear			401	Activation of ATR in response to replication stress	Activation of ATR in response to replication stress	DNA
421	pdgf signaling pathway	Signaling by PDGF	Adhesion		1040	Glutathione conjugation	Glutathione conjugation	Metabolism																							306	MyD88 dependent cascade initiated on endosome	MyD88 dependent cascade initiated on endosome	Immunity		1102	Recruitment of NuMA to mitotic centrosomes	Recruitment of NuMA to mitotic centrosomes	Cell Cycle			1279	Displacement of DNA glycosylase by APEX1	Displacement of DNA glycosylase by APEX1	DNA
59	PDGFR-alpha signaling pathway	Signaling by PDGF	Adhesion		1345	agrin in postsynaptic differentiation	Cargo trafficking to the periciliary membrane	Trafficking/Signaling																							300	Toll Like Receptor 7/8 TLR7/8 Cascade	Toll Like Receptor 7/8 (TLR7/8) Cascade	Immunity		762	Gap-filling DNA repair synthesis and ligation in TC-NER	Gap-filling DNA repair synthesis and ligation in TC-NER	DNA			914	Mitotic Telophase/Cytokinesis	Mitotic Telophase/Cytokinesis	Cell Cycle
1115	PDGFR-beta signaling pathway	Signaling by PDGF	Adhesion		186	Beta oxidation of lauroyl-CoA to decanoyl-CoA-CoA	Beta oxidation of lauroyl-CoA to decanoyl-CoA-CoA	Metabolism																							116	Inhibition of the proteolytic activity of APC/C required for the onset of anaphase by mitotic spindle checkpoint components	Inhibition of the proteolytic activity of APC/C required for the onset of anaphase by mitotic spindle checkpoint components	Cell Cycle		878	Gap-filling DNA repair synthesis and ligation in GG-NER	Gap-filling DNA repair synthesis and ligation in TC-NER	DNA			947	Heme degradation	Heme degradation	Metabolism
196	Signaling by PDGF	Signaling by PDGF	Adhesion		713	role of parkin in ubiquitin-proteasomal pathway	PINK1-PRKN Mediated Mitophagy	Metabolism																							118	Inactivation of APC/C via direct inhibition of the APC/C complex	Inactivation of APC/C via direct inhibition of the APC/C complex	Cell Cycle		1027	MAP kinase activation	MAP kinase activation	Trafficking/Signaling			260	Synthesis of bile acids and bile salts	Synthesis of bile acids and bile salts	Metabolism
151	Transferrin endocytosis and recycling	Transferrin endocytosis and recycling	Trafficking		1068	Platelet sensitization by LDL	Platelet sensitization by LDL	Adhesion																							958	Telomere Extension By Telomerase	Telomere Extension By Telomerase	DNA		114	G0 and Early G1	G0 and Early G1	Cell Cycle			990	GRB2:SOS provides linkage to MAPK signaling for Integrins	GRB2:SOS provides linkage to MAPK signaling for Integrins	Adhesion
597	snRNP Assembly	snRNP Assembly	Ribosome		506	Hippo signaling cascade	Signaling by Hippo	Trafficking/Signaling																							351	STING mediated induction of type 1 IFN	STING mediated induction of host immune responses	Immunity		917	Initiation of Nuclear Envelope (NE) Reformation	Initiation of Nuclear Envelope (NE) Reformation	Nuclear			1155	p130Cas linkage to MAPK signaling for integrins	p130Cas linkage to MAPK signaling for integrins	Adhesion
407	Endosomal Sorting Complex Required For Transport ESCRT	Endosomal Sorting Complex Required For Transport (ESCRT)	Trafficking/Signaling		449	Purine catabolism	Purine catabolism	Metabolism																							916	Condensation of Prometaphase Chromosomes	Condensation of Prometaphase Chromosomes	DNA		1022	Cell-extracellular matrix interactions	Cell-extracellular matrix interactions	Adhesion			625	AKT-mediated inactivation of FOXO1A	AKT-mediated inactivation of FOXO1A	Trafficking/Signaling
192	aspirin blocks signaling pathway involved in platelet activation	Platelet homeostasis	Adhesion		330	FOXA1 transcription factor network	Nuclear Events (kinase and transcription factor activation)	Nuclear																							1024	Nectin/Necl trans heterodimerization	Nectin/Necl trans heterodimerization	Adhesion		25	erythropoietin mediated neuroprotection through nf-kb	Signaling by Erythropoietin	Trafficking/Signaling			627	Regulation of gene expression in beta cells	Regulation of gene expression in beta cells	DNA
1073	Platelet Adhesion to exposed collagen	Platelet homeostasis	Adhesion		1081	Toll Like Receptor 4 (TLR4) Cascade	Toll Like Receptor 4 (TLR4) Cascade	Immunity																							1291	DNA replication initiation	DNA replication initiation	DNA		688	Destabilization of mRNA by Butyrate Response Factor 1 BRF1	Butyrate Response Factor 1 (BRF1) binds and destabilizes mRNA	Ribosome			904	DCC mediated attractive signaling	DCC mediated attractive signaling	Trafficking/Signaling
355	Platelet Aggregation Plug Formation	Platelet homeostasis	Adhesion		619	granzyme a mediated apoptosis pathway	Intrinsic Pathway for Apoptosis	Apoptotic																							1217	Nectin adhesion pathway	Nectin/Necl trans heterodimerization	Adhesion		364	Transport of the SLBP Dependant Mature mRNA	Transport of the SLBP Dependant Mature mRNA	Ribosome			655	NGF processing	NGF processing	Trafficking/Signaling
1157	Platelet degranulation	Platelet homeostasis	Adhesion		182	Beta oxidation of octanoyl-CoA to hexanoyl-CoA	Beta oxidation of octanoyl-CoA to hexanoyl-CoA	Metabolism																							619	granzyme a mediated apoptosis pathway	Intrinsic Pathway for Apoptosis	Apoptotic		291	Signaling by SCF-KIT	Signaling by SCF-KIT	Trafficking/Signaling			789	Tie2 Signaling	Tie2 Signaling	Trafficking/Signaling
193	Lissencephaly gene LIS1 in neuronal migration and development	Neuronal System	Differentiation		44	Glucagon signaling in metabolic regulation	Glucagon signaling pathway	Metabolism																							91	Downregulation of SMAD2/3 SMAD4 transcriptional activity	Downregulation of SMAD2/3:SMAD4 transcriptional activity	Trafficking/Signaling		231	DARPP-32 events	DARPP-32 events	Trafficking/Signaling			490	Microtubule-dependent trafficking of connexons from Golgi to the plasma membrane	Microtubule-dependent trafficking of connexons from Golgi to the plasma membrane	Trafficking/Signaling
844	lissencephaly gene lis1 in neuronal migration and development	Neuronal System	Differentiation		489	Gap junction degradation	Gap junction trafficking	Trafficking/Signaling																							599	Notch-HLH transcription pathway	Notch-HLH transcription pathway	Trafficking/Signaling		43	PKA activation in glucagon signalling	PKA activation in glucagon signalling	Trafficking/Signaling			501	IRS-related events triggered by IGF1R	IRS-related events triggered by IGF1R	Trafficking/Signaling
302	MyD88-independent cascade	MyD88-independent TLR4 cascade	Immunity		487	Gap junction assembly	Gap junction trafficking	Trafficking/Signaling																							591	FoxO family signaling	FOXO-mediated transcription	Nuclear		875	Signaling by FGFR3 mutants	Signaling by FGFR3	Trafficking/Signaling
192	aspirin blocks signaling pathway involved in platelet activation	Platelet Aggregation (Plug Formation)	Adhesion		443	Acyl chain remodeling of CL	Acyl chain remodeling of CL	Metabolism																							712	S1P3 pathway	RHO GTPases activate PAKs	Trafficking/Signaling		1278	Resolution of AP sites via the multiple-nucleotide patch replacement pathway	Resolution of AP sites via the multiple-nucleotide patch replacement pathway	Trafficking/Signaling
1073	Platelet Adhesion to exposed collagen	Platelet Aggregation (Plug Formation)	Adhesion		1238	Association of TriC/CCT with target proteins during biosynthesis	Association of TriC/CCT with target proteins during biosynthesis	Metabolism																							876	Formation of incision complex in GG-NER	Formation of Incision Complex in GG-NER	DNA		869	Signaling by FGFR4 mutants	Signaling by FGFR4	Trafficking/Signaling
355	Platelet Aggregation Plug Formation	Platelet Aggregation (Plug Formation)	Adhesion		665	CDC42 signaling events	CDC42 GTPase cycle	Trafficking/Signaling																							499	Presynaptic phase of homologous DNA pairing and strand exchange	Presynaptic phase of homologous DNA pairing and strand exchange	DNA		737	ERK/MAPK targets	ERK/MAPK targets	Trafficking/Signaling
1157	Platelet degranulation	Platelet Aggregation (Plug Formation)	Adhesion		329	Opioid Signalling	Opioid Signalling	Trafficking/Signaling																							957	Polymerase switching on the C-strand of the telomere	Polymerase switching on the C-strand of the telomere	DNA		644	TGF-beta receptor signaling	Signaling by TGFB family members	Adhesion
1068	Platelet sensitization by LDL	Platelet Aggregation (Plug Formation)	Adhesion		149	Iron uptake and transport	Iron uptake and transport	Trafficking/Signaling																							1293	Polymerase switching	Polymerase switching on the C-strand of the telomere	DNA		843	tgf beta signaling pathway	Signaling by TGFB family members	Adhesion
588	Neurotransmitter Clearance In The Synaptic Cleft	Neurotransmitter receptors and postsynaptic signal transmission	Trafficking/Signaling		764	Formation of transcription-coupled NER TC-NER repair complex	Formation of TC-NER Pre-Incision Complex	DNA																							485	Formation of annular gap junctions	Formation of annular gap junctions	Trafficking/Signaling		1345	agrin in postsynaptic differentiation	Cargo trafficking to the periciliary membrane	Trafficking/Signaling
987	Transport of the SLBP independent Mature mRNA	Transport of the SLBP independent Mature mRNA	Ribosome		1007	Assembly of the ORC complex at the origin of replication	Assembly of the ORC complex at the origin of replication	DNA																							487	Gap junction assembly	Gap junction trafficking and regulation	Trafficking/Signaling		614	p53-Dependent G1 DNA Damage Response	p53-Dependent G1 DNA Damage Response	Cell Cycle
893	U2 Dependent Splicing	mRNA Splicing - Major Pathway	Ribosome		489	Gap junction degradation	Gap junction trafficking and regulation	Trafficking/Signaling																							571	Signal attenuation	Signal attenuation	Trafficking/Signaling		1349	basic mechanisms of sumoylation	SUMOylation of chromatin organization proteins	Nuclear
364	Transport of the SLBP Dependant Mature mRNA	Transport of the SLBP Dependant Mature mRNA	Ribosome		487	Gap junction assembly	Gap junction trafficking and regulation	Trafficking/Signaling																							743	ERK2 activation	MAPK1 (ERK2) activation	Trafficking/Signaling		1179	Signaling by NOTCH3	Signaling by NOTCH	Trafficking/Signaling
896	Transport of Mature mRNA derived from an Intron-Containing Transcript	Transport of Mature mRNA derived from an Intron-Containing Transcript	Ribosome		929	DNA-PK pathway in nonhomologous end joining	Nonhomologous End-Joining (NHEJ)	DNA																							1092	ISG15 antiviral mechanism	ISG15 antiviral mechanism	Immunity		1180	Signaling by NOTCH4	Signaling by NOTCH	Trafficking/Signaling
879	Dual Incision in GG-NER	Dual Incision in GG-NER	Ribosome		888	RNA Polymerase III Abortive And Retractive Initiation	RNA Polymerase III Transcription Initiation From Type 3 Promoter	Ribosome																							12	CDO in myogenesis	Myogenesis	Differentiation		644	TGF-beta receptor signaling	Signaling by TGF-beta Receptor Complex	Trafficking/Signaling
698	Fibroblast Growth Factor Receptor FGFR signaling	Signaling by FGFR	Trafficking/Signaling		769	RNA Polymerase III Transcription Initiation From Type 3 Promoter	RNA Polymerase III Transcription Initiation From Type 3 Promoter	Ribosome																							50	Apoptotic cleavage of cellular proteins	Apoptotic cleavage of cell adhesion proteins	Apoptotic		775	RNA Polymerase II Transcription Pre-Initiation And Promoter Opening	RNA Polymerase II Transcription Pre-Initiation And Promoter Opening	Ribosome
977	Signaling by FGFR mutants	Signaling by FGFR	Trafficking/Signaling		768	RNA Polymerase III Transcription Initiation From Type 2 Promoter	RNA Polymerase III Transcription Initiation From Type 2 Promoter	Ribosome																							62	Interaction between L1 and Ankyrins	Interaction between L1 and Ankyrins	Adhesion		780	RNA Polymerase II Transcription Initiation	RNA Polymerase II Transcription Initiation	Ribosome
893	U2 Dependent Splicing	mRNA Splicing	Ribosome		699	EGFR downregulation	EGFR downregulation	Trafficking/Signaling																							216	Inhibition of replication initiation of damaged DNA by RB1/E2F1	Inhibition of replication initiation of damaged DNA by RB1/E2F1	DNA		781	RNA Polymerase II Promoter Escape	RNA Polymerase II Promoter Escape	Ribosome
818	Hypoxic and oxygen homeostasis regulation of HIF-1-alpha	Cellular response to starvation	Amino Acids		188	cbl mediated ligand-induced downregulation of egf receptors pathway	EGFR downregulation	Trafficking/Signaling																							489	Gap junction degradation	Gap junction degradation	Trafficking/Signaling		645	Insulin receptor mediated signaling	Insulin receptor signalling cascade	Trafficking/Signaling
329	Opioid Signalling	Opioid Signalling	Trafficking/Signaling		272	Metabolism of folate and pterines	Metabolism of water-soluble vitamins and cofactors	Metabolism																							744	Activation of the AP-1 family of transcription factors	Activation of the AP-1 family of transcription factors	DNA		1289	Orc1 removal from chromatin	Orc1 removal from chromatin	DNA
917	Initiation of Nuclear Envelope (NE) Reformation	Initiation of Nuclear Envelope (NE) Reformation	Nuclear		770	RNA Polymerase III Transcription Initiation From Type 1 Promoter	RNA Polymerase III Transcription Initiation From Type 1 Promoter	Ribosome																							793	SEMA3A-Plexin repulsion signaling by inhibiting Integrin adhesion	SEMA3A-Plexin repulsion signaling by inhibiting Integrin adhesion	Trafficking/Signaling		637	Transport to the Golgi and subsequent modification	Transport to the Golgi and subsequent modification	Trafficking/Signaling
487	Gap junction assembly	Gap junction trafficking	Trafficking		181	Beta oxidation of decanoyl-CoA to octanoyl-CoA-CoA	Beta oxidation of decanoyl-CoA to octanoyl-CoA-CoA	Metabolism																							978	Signaling by FGFR1 amplification mutants	Signaling by FGFR1	Trafficking/Signaling		44	Glucagon signaling in metabolic regulation	Glucagon signaling in metabolic regulation	Metabolism
784	Factors involved in megakaryocyte development and platelet production	Factors involved in megakaryocyte development and platelet production	Adhesion		216	Inhibition of replication initiation of damaged DNA by RB1/E2F1	Inhibition of replication initiation of damaged DNA by RB1/E2F1	DNA																							979	Signaling by FGFR1 fusion mutants	Signaling by FGFR1	Trafficking/Signaling		1225	Synthesis of UDP-N-acetyl-glucosamine	Synthesis of UDP-N-acetyl-glucosamine	Metabolism
1073	Platelet Adhesion to exposed collagen	Platelet Adhesion to exposed collagen	Adhesion		885	RNA Polymerase I Promoter Escape	RNA Polymerase I Promoter Escape	Ribosome																							980	Signaling by activated point mutants of FGFR1	Signaling by FGFR1	Trafficking/Signaling		567	MHC class II antigen presentation	MHC class II antigen presentation	Immunity
149	Iron uptake and transport	Iron uptake and transport	Trafficking/Signaling		717	Wnt signaling network	Wnt signaling pathway	WNT																							1057	Signaling by constitutively active EGFR	Signaling by EGFR	Trafficking/Signaling		978	Signaling by FGFR1 amplification mutants	Signaling by FGFR1	Trafficking/Signaling
246	Toll Like Receptor 9 TLR9 Cascade	Toll Like Receptor 9 (TLR9) Cascade	Immunity		887	RNA Polymerase I Transcription Termination	RNA Polymerase I Transcription Termination	Ribosome																							1216	AKT phosphorylates targets in the cytosol	AKT phosphorylates targets in the cytosol	Trafficking/Signaling		980	Signaling by activated point mutants of FGFR1	Signaling by FGFR1	Trafficking/Signaling
246	Toll Like Receptor 9 TLR9 Cascade	Toll Like Receptor 9 (TLR9) Cascade	Immunity		1225	Synthesis of UDP-N-acetyl-glucosamine	Synthesis of UDP-N-acetyl-glucosamine	Metabolism																							1284	Sodium/Proton exchangers	Sodium/Proton exchangers	Trafficking/Signaling		1057	Signaling by constitutively active EGFR	Signaling by EGFR	Trafficking/Signaling
367	GP1b-IX-V activation signalling	GP1b-IX-V activation signalling	Adhesion		162	Integration of energy metabolism	Integration of energy metabolism	Metabolism																							575	Epidermal Growth Factor Receptor EGFR signaling	Signaling by EGFR	Trafficking/Signaling		575	Epidermal Growth Factor Receptor EGFR signaling	Signaling by EGFR	Trafficking/Signaling
65	Signal transduction by L1	Signal amplification	Trafficking/Signaling		1262	Recycling of eIF2 GDP	Recycling of eIF2:GDP	Ribosome																							683	EGFR-dependent Endothelin signaling events	Signaling by EGFR	Trafficking/Signaling		698	Fibroblast Growth Factor Receptor FGFR signaling	Signaling by FGFR1	Trafficking/Signaling
1105	EGF receptor ErbB1 signaling pathway	Signaling by EGFR	Trafficking/Signaling		909	Signaling by Robo receptor	Signaling by ROBO receptors	Trafficking/Signaling																							698	Fibroblast Growth Factor Receptor FGFR signaling	Signaling by FGFR1	Trafficking/Signaling		1288	CDK-mediated phosphorylation and removal of Cdc6	CDK-mediated phosphorylation and removal of Cdc6	Cell Cycle
683	EGFR-dependent Endothelin signaling events	Signaling by EGFR	Trafficking/Signaling		778	RNA Pol II CTD phosphorylation and interaction with CE	RNA Pol II CTD phosphorylation and interaction with CE	Ribosome																							1105	EGF receptor ErbB1 signaling pathway	Signaling by EGFR	Trafficking/Signaling		1143	Generation of second messenger molecules	Generation of second messenger molecules	Trafficking/Signaling
1057	Signaling by constitutively active EGFR	Signaling by EGFR	Trafficking/Signaling		916	Condensation of Prometaphase Chromosomes	Condensation of Prometaphase Chromosomes	DNA																							1313	akt signaling pathway	AKT phosphorylates targets in the cytosol	Trafficking/Signaling		12	CDO in myogenesis	Myogenesis	Differentiation
1337	Signaling events mediated by focal adhesion kinase	Signaling by EGFR	Trafficking/Signaling		539	Vitamin C ascorbate metabolism	Vitamin C (ascorbate) metabolism	Metabolism																							120	HIF-2-alpha transcription factor network	Cellular response to chemical stress	Hypoxia		203	Toll Like Receptor TLR1 TLR2 Cascade	Toll Like Receptor TLR1:TLR2 Cascade	Immunity
749	Regulation of Glucokinase by Glucokinase Regulatory Protein	Regulation of Glucokinase by Glucokinase Regulatory Protein	Metabolism		892	mRNA Capping	mRNA Capping	Ribosome																							818	Hypoxic and oxygen homeostasis regulation of HIF-1-alpha	Cellular response to chemical stress	Hypoxia		218	Activation of the pre-replicative complex	Activation of APC/C and APC/C:Cdc20 mediated degradation of mitotic proteins	Cell Cycle
155	Ion transport by P-type ATPases	Ion transport by P-type ATPases	Trafficking/Signaling		816	Calcineurin-regulated NFAT-dependent transcription in lymphocytes	Calcineurin activates NFAT	Immunity																							924	hypoxia and p53 in the cardiovascular system	Cellular response to chemical stress	Hypoxia		301	Toll Like Receptor 5 TLR5 Cascade	Toll Like Receptor 5 (TLR5) Cascade	Immunity
157	Ligand-gated ion channel transport	Ion transport by P-type ATPases	Trafficking/Signaling		710	nfat and hypertrophy of the heart	Calcineurin activates NFAT	Immunity																							282	APC-Cdc20 mediated degradation of Nek2A	APC-Cdc20 mediated degradation of Nek2A	Cell Cycle		571	Signal attenuation	Signal attenuation	Trafficking/Signaling
411	ATM mediated response to DNA double-strand break	DNA Double Strand Break Response	DNA		465	Role of Calcineurin-dependent NFAT signaling in lymphocytes	Calcineurin activates NFAT	Immunity																							1156	Signaling by BMP	Signaling by BMP	Trafficking/Signaling		747	Facilitative Na -independent glucose transporters	Glucose metabolism	Metabolism
1257	cdc25 and chk1 regulatory pathway in response to dna damage	DNA Double Strand Break Response	DNA		1216	AKT phosphorylates targets in the cytosol	AKT phosphorylates targets in the cytosol	Trafficking/Signaling																							56	Formation of apoptosome	Formation of apoptosome	Apoptotic		764	Formation of transcription-coupled NER TC-NER repair complex	Formation of TC-NER Pre-Incision Complex	DNA
328	G-protein activation	G-protein mediated events	Trafficking/Signaling		759	Hyaluronan uptake and degradation	Hyaluronan uptake and degradation	Trafficking/Signaling																							1196	Golgi Cisternae Pericentriolar Stack Reorganization	Golgi Cisternae Pericentriolar Stack Reorganization	Trafficking/Signaling		324	G alpha i signalling events	G alpha (i) signalling events	Trafficking/Signaling
610	g-protein signaling through tubby proteins	G-protein mediated events	Trafficking/Signaling		1341	Striated Muscle Contraction	Striated Muscle Contraction	Trafficking/Signaling																							764	Formation of transcription-coupled NER TC-NER repair complex	Formation of TC-NER Pre-Incision Complex	DNA		4	Ubiquitin-dependent degradation of Cyclin D1	Ubiquitin-dependent degradation of Cyclin D	Cell Cycle
1316	hop pathway in cardiac development	HSP90 chaperone cycle for steroid hormone receptors (SHR) in the presence of ligand	Trafficking/Signaling		805	Calcium signaling in the CD4 TCR pathway	Calcium signaling pathway	Trafficking/Signaling																							2	Processive synthesis on the lagging strand	Processive synthesis on the lagging strand	DNA		1316	hop pathway in cardiac development	HSP90 chaperone cycle for steroid hormone receptors (SHR) in the presence of ligand	Trafficking/Signaling
644	TGF-beta receptor signaling	TGF-beta receptor signaling activates SMADs	Trafficking/Signaling		738	ERKs are inactivated	ERKs are inactivated	Trafficking/Signaling																							3	Removal of the Flap Intermediate	Removal of the Flap Intermediate	DNA		793	SEMA3A-Plexin repulsion signaling by inhibiting Integrin adhesion	SEMA3A-Plexin repulsion signaling by inhibiting Integrin adhesion	Trafficking/Signaling
90	TGF-beta receptor signaling in EMT epithelial to mesenchymal transition	TGF-beta receptor signaling activates SMADs	Trafficking/Signaling		1232	Arachidonic acid metabolism	Arachidonic acid metabolism	Metabolism																							1366	Nuclear signaling by ERBB4	Nuclear signaling by ERBB4	Trafficking/Signaling		1019	Type I hemidesmosome assembly	Type I hemidesmosome assembly	Adhesion
1102	Recruitment of NuMA to mitotic centrosomes	Recruitment of NuMA to mitotic centrosomes	Cell Cycle		1330	Apoptotic cleavage of cell adhesion proteins	Apoptotic cleavage of cell adhesion proteins	Apoptotic																							753	Amino acid transport across the plasma membrane	Amino acid transport across the plasma membrane	Trafficking/Signaling		1216	AKT phosphorylates targets in the cytosol	AKT phosphorylates targets in the cytosol	Trafficking/Signaling
847	Toll Like Receptor 10 (TLR10) Cascade	Toll Like Receptor 10 (TLR10) Cascade	Trafficking/Signaling		1277	Resolution of AP sites via the single-nucleotide replacement pathway	Resolution of AP sites via the single-nucleotide replacement pathway	DNA																							142	Degradation of beta catenin	Degradation of beta-catenin by the destruction complex	WNT		305	TRAF6 mediated induction of NFkB and MAP kinases upon TLR7/8 or 9 activation	TRAF6 mediated induction of NFkB and MAP kinases upon TLR7/8 or 9 activation	Immunity
301	Toll Like Receptor 5 TLR5 Cascade	Toll Like Receptor 5 (TLR5) Cascade	Immunity		1105	EGF receptor ErbB1 signaling pathway	Signaling by EGFR	Trafficking/Signaling																							504	Degradation of beta-catenin by the destruction complex	Degradation of beta-catenin by the destruction complex	WNT		155	Ion transport by P-type ATPases	Ion transport by P-type ATPases	Trafficking/Signaling
203	Toll Like Receptor TLR1 TLR2 Cascade	Toll Like Receptor 2 (TLR2) Cascade	Immunity		1057	Signaling by constitutively active EGFR	Signaling by EGFR	Trafficking/Signaling																												306	MyD88 dependent cascade initiated on endosome	MyD88 dependent cascade initiated on endosome	Immunity
203	Toll Like Receptor TLR1 TLR2 Cascade	Toll Like Receptor TLR1:TLR2 Cascade	Immunity		901	EphrinA-EPHA pathway	EPH-Ephrin signaling	Trafficking/Signaling																												887	RNA Polymerase I Transcription Termination	RNA Polymerase I Transcription Termination	Ribosome
203	Toll Like Receptor TLR1 TLR2 Cascade	Toll Like Receptor TLR6:TLR2 Cascade	Immunity		245	EPHA2 forward signaling	EPH-Ephrin signaling	Trafficking/Signaling																												1277	Resolution of AP sites via the single-nucleotide replacement pathway	Resolution of Abasic Sites (AP sites)	DNA
1385	Toll Like Receptor TLR6:TLR2 Cascade	Toll Like Receptor TLR6:TLR2 Cascade	Immunity		717	Wnt signaling network	Wnt signaling pathway and pluripotency	WNT																												120	HIF-2-alpha transcription factor network	Cellular response to chemical stress	Hypoxia
489	Gap junction degradation	Gap junction degradation	Immunity		883	Repair synthesis of patch 27-30 bases long by DNA polymerase	PCNA-Dependent Long Patch Base Excision Repair	DNA																												818	Hypoxic and oxygen homeostasis regulation of HIF-1-alpha	Cellular response to chemical stress	Hypoxia
856	mTOR signaling pathway	MTOR signalling	Amino Acids		503	Beta-catenin phosphorylation cascade	Beta-catenin phosphorylation cascade	Immunity																												924	hypoxia and p53 in the cardiovascular system	Cellular response to chemical stress	Hypoxia
1206	mtor signaling pathway	MTOR signalling	Amino Acids		495	Processing of DNA double-strand break ends	Processing of DNA double-strand break ends	WNT																												218	Activation of the pre-replicative complex	Activation of the pre-replicative complex	DNA
745	Toll Like Receptor 3 TLR3 Cascade	Toll Like Receptor 3 (TLR3) Cascade	Immunity		195	Retrograde neurotrophin signalling	Retrograde neurotrophin signalling	Trafficking/Signaling																												367	GP1b-IX-V activation signalling	GP1b-IX-V activation signalling	Trafficking/Signaling
621	S6K1 signalling	mTORC1-mediated signalling	Amino Acids		1029	EPHB forward signaling	EPHB-mediated forward signaling	Trafficking/Signaling																												511	p53 pathway	Stabilization of p53	Trafficking/Signaling
620	S6K1-mediated signalling	mTORC1-mediated signalling	Amino Acids		506	Hippo signaling cascade	Hippo signaling pathway	Trafficking/Signaling																												798	Direct p53 effectors	Stabilization of p53	Trafficking/Signaling
1349	basic mechanisms of sumoylation	SUMOylation of DNA damage response and repair proteins	Nuclear		737	ERK/MAPK targets	ERK/MAPK targets	Trafficking/Signaling																												903	NCAM signaling for neurite out-growth	NCAM signaling for neurite out-growth	Trafficking/Signaling
155	Ion transport by P-type ATPases	Ion homeostasis	Trafficking/Signaling		311	Trafficking of AMPA receptors	Trafficking of GluR2-containing AMPA receptors	Trafficking/Signaling																												1003	COPI Mediated Transport	COPI-mediated anterograde transport	Trafficking/Signaling
157	Ligand-gated ion channel transport	Ion homeostasis	Trafficking/Signaling		310	Trafficking of GluR2-containing AMPA receptors	Trafficking of GluR2-containing AMPA receptors	Trafficking/Signaling																												384	p75NTR recruits signalling complexes	p75NTR recruits signalling complexes	Trafficking/Signaling
576	Formation of the Early Elongation Complex	Formation of the Early Elongation Complex	Ribosome		1278	Resolution of AP sites via the multiple-nucleotide patch replacement pathway	Resolution of AP sites via the multiple-nucleotide patch replacement pathway	DNA																												782	PECAM1 interactions	PECAM1 interactions	Adhesion
684	Nonsense Mediated Decay Enhanced by the Exon Junction Complex	Nonsense Mediated Decay (NMD) enhanced by the Exon Junction Complex (EJC)	Ribosome		411	ATM mediated response to DNA double-strand break	DNA Double-Strand Break Repair	DNA																												938	eNOS activation	eNOS activation	Trafficking/Signaling
1027	MAP kinase activation	MAP kinase activation	Trafficking/Signaling		1227	N-glycan trimming in the ER and Calnexin/Calreticulin cycle	N-glycan trimming in the ER and Calnexin/Calreticulin cycle	Metabolism																												1029	EPHB forward signaling	EPHB-mediated forward signaling	Trafficking/Signaling
1349	basic mechanisms of sumoylation	SUMOylation of SUMOylation proteins	Nuclear		1149	CTLA4 inhibitory signaling	CTLA4 inhibitory signaling	Cell Cycle																												1043	Autodegradation of Cdh1 by Cdh1:APC/C	Autodegradation of Cdh1 by Cdh1:APC/C	Cell Cycle
878	Gap-filling DNA repair synthesis and ligation in GG-NER	Gap-filling DNA repair synthesis and ligation in GG-NER	DNA		905	Netrin-1 signaling	Netrin-1 signaling	Adhesion																												1199	Clearance of Nuclear Envelope Membranes from Chromatin	Nuclear Envelope (NE) Reassembly	Nuclear
305	TRAF6 mediated induction of NFkB and MAP kinases upon TLR7/8 or 9 activation	TRAF6 mediated induction of NFkB and MAP kinases upon TLR7/8 or 9 activation	Immunity		762	Gap-filling DNA repair synthesis and ligation in TC-NER	Gap-filling DNA repair synthesis and ligation in TC-NER	DNA																												60	Recycling pathway of L1	Recycling pathway of L1	Adhesion
950	vegf hypoxia and angiogenesis	Signaling by VEGF	Trafficking/Signaling		899	Activation of Rac	Activation of RAC1 downstream of NMDARs	Trafficking/Signaling																												559	PI3K Cascade	PI3K Cascade	Trafficking/Signaling
1212	VEGFR1 specific signals	Signaling by VEGF	Trafficking/Signaling		253	RAC1 signaling pathway	Activation of RAC1 downstream of NMDARs	Trafficking/Signaling																												955	Removal of the Flap Intermediate from the C-strand	Removal of the Flap Intermediate from the C-strand	Ribosome
825	VEGFR3 signaling in lymphatic endothelium	Signaling by VEGF	Trafficking/Signaling		1128	Abacavir metabolism	Abacavir metabolism	Metabolism																												1069	Reduction of cytosolic Ca++ levels	Reduction of cytosolic Ca++ levels	Trafficking/Signaling
785	Kinesins	Kinesins	Cell Cycle		1211	il 3 signaling pathway	Other interleukin signaling	Immunity																												58	L1CAM interactions	L1CAM interactions	Adhesion
306	MyD88 dependent cascade initiated on endosome	MyD88 dependent cascade initiated on endosome	Trafficking/Signaling		1208	il 2 signaling pathway	Other interleukin signaling	Immunity																												296	SHC1 events in ERBB2 signaling	SHC1 events in ERBB2 signaling	Trafficking/Signaling
167	Sphingolipid de novo biosynthesis	Sphingolipid metabolism	Metabolism		1145	Costimulation by the CD28 family	Costimulation by the CD28 family	Immunity																												310	Trafficking of GluR2-containing AMPA receptors	Trafficking of GluR2-containing AMPA receptors	Trafficking/Signaling
300	Toll Like Receptor 7/8 TLR7/8 Cascade	Toll Like Receptor 7/8 (TLR7/8) Cascade	Immunity		765	Dual incision reaction in TC-NER	Dual incision in TC-NER	DNA																												652	NRIF signals cell death from the nucleus	NRIF signals cell death from the nucleus	Apoptotic
876	Formation of incision complex in GG-NER	Formation of Incision Complex in GG-NER	DNA		564	Antigen processing Ubiquitination Proteasome degradation	Antigen processing and presentation	Immunity																												954	Processive synthesis on the C-strand of the telomere	Processive synthesis on the C-strand of the telomere	DNA
577	Formation of RNA Pol II elongation complex	Formation of RNA Pol II elongation complex	Ribosome		1279	Displacement of DNA glycosylase by APEX1	Displacement of DNA glycosylase by APEX1	DNA																												1361	SHC1 events in ERBB4 signaling	SHC1 events in ERBB2 signaling	Trafficking/Signaling
779	RNA Polymerase II Transcription Elongation	RNA Polymerase II Transcription Elongation	Ribosome		779	RNA Polymerase II Transcription Elongation	RNA Polymerase II Transcription Elongation	Ribosome																												90	TGF-beta receptor signaling in EMT epithelial to mesenchymal transition	TGF-beta receptor signaling in EMT (epithelial to mesenchymal transition)	Trafficking/Signaling
51	Apoptotic execution phase	Apoptotic execution phase	Apoptotic		577	Formation of RNA Pol II elongation complex	Formation of RNA Pol II elongation complex	Ribosome																												429	PKA activation	PKA activation	Trafficking/Signaling
50	Apoptotic cleavage of cellular proteins	Apoptotic cleavage of cellular proteins	Apoptotic		1263	Eukaryotic Translation Elongation	Eukaryotic Translation Elongation	Ribosome																												432	PKA-mediated phosphorylation of CREB	PKA-mediated phosphorylation of CREB	Trafficking/Signaling
1349	basic mechanisms of sumoylation	SUMOylation of ubiquitinylation proteins	Nuclear		429	PKA activation	PKA activation in glucagon signalling	Trafficking/Signaling																												1324	Synthesis of PIPs at the Golgi membrane	Synthesis of PIPs at the Golgi membrane	Trafficking/Signaling
681	Glutamate Neurotransmitter Release Cycle	Glutamate binding, activation of AMPA receptors and synaptic plasticity	Trafficking/Signaling		43	PKA activation in glucagon signalling	PKA activation in glucagon signalling	Trafficking/Signaling																												501	IRS-related events triggered by IGF1R	IRS-related events triggered by IGF1R	Insulin
311	Trafficking of AMPA receptors	Trafficking of AMPA receptors	Trafficking/Signaling		272	Metabolism of folate and pterines	Metabolism of vitamins and cofactors	Metabp;os,																												500	Signaling by Type 1 Insulin-like Growth Factor 1 Receptor IGF1R	Signaling by Type 1 Insulin-like Growth Factor 1 Receptor (IGF1R)	Insulin
1118	Trk receptor signaling mediated by the MAPK pathway	Negative regulation of MAPK pathway	Trafficking/Signaling		311	Trafficking of AMPA receptors	Trafficking of AMPA receptors	Trafficking/Signaling																												696	GAB1 signalosome	GAB1 signalosome	Trafficking/Signaling
999	Golgi Associated Vesicle Biogenesis	Golgi Associated Vesicle Biogenesis	Trafficking/Signaling		310	Trafficking of GluR2-containing AMPA receptors	Trafficking of AMPA receptors	Trafficking/Signaling																												1227	N-glycan trimming in the ER and Calnexin/Calreticulin cycle	N-glycan trimming in the ER and Calnexin/Calreticulin cycle	Metabolism
354	GPVI-mediated activation cascade	GPVI-mediated activation cascade	Immunity		1189	Prolactin receptor signaling	Prolactin receptor signaling	Trafficking/Signaling																												1068	Platelet sensitization by LDL	Platelet sensitization by LDL	Adhesion
1242	L13a-mediated translational silencing of Ceruloplasmin expression	L13a-mediated translational silencing of Ceruloplasmin expression	Ribosome		65	Signal transduction by L1	Signal transduction by L1	Trafficking/Signaling
1169	GTP hydrolysis and joining of the 60S ribosomal subunit	GTP hydrolysis and joining of the 60S ribosomal subunit	Ribosome		857	Regulation of Insulin-like Growth Factor IGF Transport and Uptake by Insulin-like Growth Factor Binding Proteins IGFBPs	Regulation of insulin secretion	Insulin
1085	PAR1-mediated thrombin signaling events	Thrombin signalling through proteinase activated receptors (PARs)	Trafficking/Signaling		47	Regulation of Insulin Secretion by Acetylcholine	Regulation of insulin secretion	Insulin
1034	PAR4-mediated thrombin signaling events	Thrombin signalling through proteinase activated receptors (PARs)	Trafficking/Signaling		46	Regulation of Insulin Secretion	Regulation of insulin secretion	Insulin
985	Thrombin signalling through proteinase activated receptors (PARs)	Thrombin signalling through proteinase activated receptors (PARs)	Trafficking/Signaling		42	Regulation of Insulin Secretion by Fatty Acids Bound to GPR40 FFAR1	Regulation of insulin secretion	Insulin
1286	Leading Strand Synthesis	Leading Strand Synthesis	DNA		41	Regulation of Insulin Secretion by Glucagon-like Peptide-1	Regulation of insulin secretion	Insulin
1286	Leading Strand Synthesis	Leading Strand Synthesis	DNA		1291	DNA replication initiation	DNA replication	DNA
1293	Polymerase switching	Polymerase switching	DNA		1049	SCF-beta-TrCP mediated degradation of Emi1	SCF-beta-TrCP mediated degradation of Emi1	Cell Cycle
998	a4b7 Integrin signaling	Integrin signaling	Adhesion		209	NF-kB activation through FADD/RIP-1 pathway mediated by caspase-8 and -10	Caspase activation via extrinsic apoptotic signalling pathway	Apoptotic
708	a6b1 and a6b4 Integrin signaling	Integrin signaling	Adhesion		32	induction of apoptosis through dr3 and dr4/5 death receptors	Caspase activation via extrinsic apoptotic signalling pathway	Apoptotic
716	amb2 Integrin signaling	Integrin signaling	Adhesion		653	NRAGE signals death through JNK	NRAGE signals death through JNK	Trafficking/Signaling
307	Beta2 integrin cell surface interactions	Integrin signaling	Adhesion		829	Regulation of pyruvate dehydrogenase PDH complex	Regulation of pyruvate dehydrogenase (PDH) complex	Metabolism
505	Integrin cell surface interactions	Integrin signaling	Adhesion		621	S6K1 signalling	mTORC1-mediated signalling	Amino Acids
38	Osteopontin-mediated events	Integrin signaling	Adhesion		620	S6K1-mediated signalling	mTORC1-mediated signalling	Amino Acids
624	Signaling by NODAL	Signaling by NODAL	Adhesion		1278	Resolution of AP sites via the multiple-nucleotide patch replacement pathway	Resolution of Abasic Sites (AP sites)	DNA
212	Negative regulators of RIG-I/MDA5 signaling	Negative feedback regulation of MAPK pathway	Trafficking/Signaling		1277	Resolution of AP sites via the single-nucleotide replacement pathway	Resolution of Abasic Sites (AP sites)	DNA
416	Recruitment of repair and signaling proteins to double-strand breaks	Recruitment and ATM-mediated phosphorylation of repair and signaling proteins at DNA double strand breaks	DNA		1202	Resolution of Sister Chromatid Cohesion	Resolution of Abasic Sites (AP sites)	DNA
545	Regulation of actin dynamics for phagocytic cup formation	Regulation of actin dynamics for phagocytic cup formation	Trafficking/Signaling		589	Dopamine clearance from the synaptic cleft	Dopamine clearance from the synaptic cleft	Metabolism
646	Spry regulation of FGF signaling	Spry regulation of FGF signaling	Trafficking/Signaling		44	Glucagon signaling in metabolic regulation	Glucagon signaling in metabolic regulation	Metabolism
699	EGFR downregulation	EGFR downregulation	Trafficking/Signaling		726	Alcohol catabolism	Ethanol oxidation	Metabolism
1155	p130Cas linkage to MAPK signaling for integrins	p130Cas linkage to MAPK signaling for integrins	Trafficking/Signaling		733	Peptide hormone biosynthesis	Peptide hormone metabolism	Metabolism
1349	basic mechanisms of sumoylation	SUMOylation of RNA binding proteins	Nuclear		489	Gap junction degradation	Gap junction	Trafficking/Signaling
359	Urea synthesis	Urea cycle	Metabolism		487	Gap junction assembly	Gap junction	Trafficking/Signaling
959	Telomere C-strand Lagging Strand Synthesis	Telomere C-strand (Lagging Strand) Synthesis	DNA		1349	basic mechanisms of sumoylation	SUMOylation of nuclear envelope proteins	Nuclear
572	Immunoregulatory interactions between a Lymphoid and a non-Lymphoid cell	Immunoregulatory interactions between a Lymphoid and a non-Lymphoid cell	Immunity		77	Signaling events mediated by HDAC Class I	SUMOylation of nuclear envelope proteins	Nuclear
1225	Synthesis of UDP-N-acetyl-glucosamine	Synthesis of UDP-N-acetyl-glucosamine	Metabolism		176	Activation of BIM and translocation to mitochondria	Activation of BIM and translocation to mitochondria	Metabolism
1172	Formation of a pool of free 40S subunits	Formation of a pool of free 40S subunits	Ribosome		1053	double stranded rna induced gene expression	DNA Double Strand Break Response	DNA
1099	Regulation of PLK1 Activity at G2/M Transition	Regulation of PLK1 Activity at G2/M Transition	Cell Cycle		262	Regulation of Cholesterol Biosynthesis by SREBP SREBF	Regulation of cholesterol biosynthesis by SREBP (SREBF)	Metabollism
966	Elastic fibre formation	Elastic fibre formation	Adhesion		777	RNA Polymerase II Pre-transcription Events	RNA Polymerase II Pre-transcription Events	Ribosome
1364	Signaling by ERBB4	Signaling by ERBB4	Trafficking/Signaling		656	Insulin receptor recycling	Insulin receptor recycling	Insulin
374	Fatty Acyl-CoA Biosynthesis	Fatty acid metabolism	Metabolism		645	Insulin receptor mediated signaling	Insulin receptor recycling	Insulin
777	RNA Polymerase II Pre-transcription Events	RNA Polymerase II Pre-transcription Events	Ribosome		451	Pyrimidine biosynthesis	Pyrimidine biosynthesis	Metabolism
1038	Mitochondrial Iron-Sulfur Cluster Biogenesis	Mitochondrial calcium ion transport	Metabolism		168	Glycosphingolipid metabolism	Glycosphingolipid metabolism	Metabolism
730	Mitochondrial Protein Import	Mitochondrial calcium ion transport	Metabolism		360	Carnitine synthesis	Carnitine synthesis	Metabolism
986	ADP signalling through P2Y purinoceptor 1	ADP signalling through P2Y purinoceptor 1	Trafficking/Signaling		960	Deposition of New CENPA-containing Nucleosomes at the Centromere	Deposition of new CENPA-containing nucleosomes at the centromere	Cell Cycle
788	Cell surface interactions at the vascular wall	Cell surface interactions at the vascular wall	Adhesion		1232	Arachidonic acid metabolism	Fatty acid metabolism	Metabolism
139	ADP signalling through P2Y purinoceptor 12	ADP signalling through P2Y purinoceptor 12	Trafficking/Signaling		151	Transferrin endocytosis and recycling	Transferrin endocytosis and recycling	Trafficking/Signaling
743	ERK2 activation	MAPK1 (ERK2) activation	Trafficking/Signaling		531	Synthesis of PC	Synthesis of PC	Metabolism
744	Activation of the AP-1 family of transcription factors	Activation of the AP-1 family of transcription factors	Nuclear		269	FasL/ CD95L signaling	FasL/ CD95L signaling	Immunity
881	Nonhomologous End-joining NHEJ	Nonhomologous End-Joining (NHEJ)	DNA		251	fas signaling pathway cd95	FasL/ CD95L signaling	Immunity
874	Signaling by activated point mutants of FGFR3	Signaling by FGFR3	Trafficking/Signaling		170	FAS CD95 signaling pathway	FasL/ CD95L signaling	Immunity
875	Signaling by FGFR3 mutants	Signaling by FGFR3	Trafficking/Signaling		963	Degradation of collagen	Degradation of the extracellular matrix	Adhesion
788	Cell surface interactions at the vascular wall	Cell junction organization	Trafficking/Signaling		940	NOSTRIN mediated eNOS trafficking	NOSTRIN mediated eNOS trafficking	Trafficking/Signaling
1168	Ribosomal scanning and start codon recognition	Ribosomal scanning and start codon recognition	Differentiation		1021	Localization of the PINCH-ILK-PARVIN complex to focal adhesions	Localization of the PINCH-ILK-PARVIN complex to focal adhesions	Adhesion
1171	Translation initiation complex formation	Translation initiation complex formation	DNA		272	Metabolism of folate and pterines	Metabolism of folate and pterines	Metabolism
869	Signaling by FGFR4 mutants	Signaling by FGFR4	Trafficking/Signaling		965	Fibronectin matrix formation	Fibronectin matrix formation	Adhesion
1278	Resolution of AP sites via the multiple-nucleotide patch replacement pathway	Resolution of AP sites via the multiple-nucleotide patch replacement pathway	Trafficking/Signaling		185	Beta oxidation of palmitoyl-CoA to myristoyl-CoA	Beta oxidation of palmitoyl-CoA to myristoyl-CoA	Metabolism
908	Regulation of Commissural axon pathfinding by Slit and Robo	Regulation of expression of SLITs and ROBOs	Ribosome
630	Miscellaneous substrates	Miscellaneous transport and binding events	Trafficking/Signaling
1157	Platelet degranulation	Platelet degranulation	Adhesion
401	Activation of ATR in response to replication stress	Activation of ATR in response to replication stress	DNA
571	Signal attenuation	Signal attenuation	Trafficking/Signaling
1170	Activation of the mRNA upon binding of the cap-binding complex and eIFs and subsequent binding to 43S	Activation of the mRNA upon binding of the cap-binding complex and eIFs, and subsequent binding to 43S	Ribosome
1159	Response to elevated platelet cytosolic Ca2	Response to elevated platelet cytosolic Ca2+	Trafficking/Signaling
742	ERK1 activation	MAPK3 (ERK1) activation	Trafficking/Signaling
168	Glycosphingolipid metabolism	Glycosphingolipid metabolism	Metabolism
1100	Recruitment of mitotic centrosome proteins and complexes	Recruitment of mitotic centrosome proteins and complexes	Cell Cycle
485	Formation of annular gap junctions	Formation of annular gap junctions	Formation
1166	Stimuli-sensing channels	Stimuli-sensing channels	Trafficking/Signaling
573	Rap1 signalling	Rap1 signalling	Trafficking/Signaling
495	Processing of DNA double-strand break ends	Processing of DNA double-strand break ends	DNA
740	activated TAK1 mediates p38 MAPK activation	activated TAK1 mediates p38 MAPK activation	Trafficking/Signaling
160	p38 MAPK signaling pathway	activated TAK1 mediates p38 MAPK activation	Trafficking/Signaling
849	TAK1 activates NFkB by phosphorylation and activation of IKKs complex	activated TAK1 mediates p38 MAPK activation	Trafficking/Signaling
12	CDO in myogenesis	Myogenesis	Differentiation
1349	basic mechanisms of sumoylation	SUMOylation of chromatin organization proteins	Nuclear
698	Fibroblast Growth Factor Receptor FGFR signaling	Signaling by FGFR1	DNA
980	Signaling by activated point mutants of FGFR1	Signaling by FGFR1	Trafficking/Signaling
977	Signaling by FGFR mutants	Signaling by FGFR1	Trafficking/Signaling
978	Signaling by FGFR1 amplification mutants	Signaling by FGFR1	Trafficking/Signaling
979	Signaling by FGFR1 fusion mutants	Signaling by FGFR1	Trafficking/Signaling
957	Polymerase switching on the C-strand of the telomere	Polymerase switching on the C-strand of the telomere	Trafficking/Signaling
62	Interaction between L1 and Ankyrins	Interaction between L1 and Ankyrins	Adhesion
197	Downstream signal transduction	Downstream signal transduction	Trafficking/Signaling
647	Negative regulation of FGFR signaling	Negative regulation of FGFR3 signaling	Trafficking/Signaling
782	PECAM1 interactions	PECAM1 interactions	Adhesion
233	PLC beta mediated events	PLC beta mediated events	Trafficking/Signaling
764	Formation of transcription-coupled NER TC-NER repair complex	Formation of TC-NER Pre-Incision Complex	DNA
596	Nonsense Mediated Decay Independent of the Exon Junction Complex	Nonsense Mediated Decay (NMD) independent of the Exon Junction Complex (EJC)	Ribosome
382	NF-kB is activated and signals survival	NF-kB is activated and signals survival	Immunity
647	Negative regulation of FGFR signaling	Negative regulation of FGFR4 signaling	Trafficking/Signaling
490	Microtubule-dependent trafficking of connexons from Golgi to the plasma membrane	Microtubule-dependent trafficking of connexons from Golgi to the plasma membrane	Trafficking/Signaling
2	Processive synthesis on the lagging strand	Processive synthesis on the lagging strand	DNA
3	Removal of the Flap Intermediate	Removal of the Flap Intermediate	DNA
895	mRNA Splicing - Minor Pathway	mRNA Splicing - Minor Pathway	Ribosome
647	Negative regulation of FGFR signaling	Negative regulation of FGFR1 signaling	Trafficking/Signaling
342	Utilization of Ketone Bodies	Utilization of Ketone Bodies	Metabolism
1038	Mitochondrial Iron-Sulfur Cluster Biogenesis	Mitochondrial translation	Metabolism
568	ER-Phagosome pathway	ER-Phagosome pathway	Trafficking/Signaling
1173	Formation of the ternary complex and subsequently the 43S complex	Formation of the ternary complex, and subsequently, the 43S complex	Ribosome
647	Negative regulation of FGFR signaling	Negative regulation of FGFR2 signaling	Trafficking/Signaling
848	Trafficking and processing of endosomal TLR	Trafficking and processing of endosomal TLR	Immunity
892	mRNA Capping	mRNA Capping	Ribosome
990	GRB2:SOS provides linkage to MAPK signaling for Integrins	GRB2:SOS provides linkage to MAPK signaling for Integrins	Adhesion
1297	Syndecan-2-mediated signaling events	Syndecan interactions	Adhesion
1079	Syndecan-3-mediated signaling events	Syndecan interactions	Adhesion
385	Syndecan-4-mediated signaling events	Syndecan interactions	Adhesion
1197	Loss of Nlp from mitotic centrosomes	Loss of Nlp from mitotic centrosomes	WNT
1101	Loss of proteins required for interphase microtubule organization from the centrosome	Loss of proteins required for interphase microtubule organization from the centrosome	Cell Cycle
503	Beta-catenin phosphorylation cascade	Beta-catenin phosphorylation cascade	Cell Cycle
943	ChREBP activates metabolic gene expression	ChREBP activates metabolic gene expression	Nuclear
1277	Resolution of AP sites via the single-nucleotide replacement pathway	Resolution of Abasic Sites (AP sites)	DNA
652	NRIF signals cell death from the nucleus	NRIF signals cell death from the nucleus	Apoptotic
1000	Lysosome Vesicle Biogenesis	Lysosome Vesicle Biogenesis	Immunity
272	Metabolism of folate and pterines	Metabolism of porphyrins	Metabolism
362	Metabolism of polyamines	Metabolism of porphyrins	Metabolism
218	Activation of the pre-replicative complex	Activation of the pre-replicative complex	DNA
736	Aurora A signaling	AURKA Activation by TPX2	Trafficking/Signaling
549	GABA B receptor activation	GABA B receptor activation	Trafficking/Signaling
944	nf-kb signaling pathway	p75NTR signals via NF-kB	Immunity
384	p75NTR recruits signalling complexes	p75NTR signals via NF-kB	Immunity
90	TGF-beta receptor signaling in EMT epithelial to mesenchymal transition	TGF-beta receptor signaling in EMT (epithelial to mesenchymal transition)	Differentiation
326	G beta gamma signalling through PLC beta	G beta:gamma signalling through PLC beta	Trafficking/Signaling
827	Respiratory electron transport	Respiratory electron transport, ATP synthesis by chemiosmotic coupling, and heat production by uncoupling proteins.	Respiratory
1092	ISG15 antiviral mechanism	ISG15 antiviral mechanism	Immunity
947	Heme degradation	Heme degradation	Metabolism
552	Presynaptic function of Kainate receptors	Presynaptic function of Kainate receptors	Trafficking/Signaling
1073	Platelet Adhesion to exposed collagen	Platelet calcium homeostasis	Adhesion
965	Fibronectin matrix formation	Fibronectin matrix formation	Adhesion
737	ERK/MAPK targets	ERK/MAPK targets	Adhesion
1068	Platelet sensitization by LDL	Platelet sensitization by LDL	Adhesion
894	mRNA 3 -end processing	mRNA 3'-end processing	Ribosome
88	Downregulation of TGF-beta receptor signaling	Downregulation of TGF-beta receptor signaling	Trafficking/Signaling
1227	N-glycan trimming in the ER and Calnexin/Calreticulin cycle	N-glycan trimming in the ER and Calnexin/Calreticulin cycle	Trafficking/Signaling
13	G alpha s signalling events	G alpha (s) signalling events	Adhesion
328	G-protein activation	G-protein activation	Trafficking/Signaling
632	Fatty acids	Fatty Acids bound to GPR40 (FFAR1) regulate insulin secretion	Insulin
1264	SRP-dependent cotranslational protein targeting to membrane	SRP-dependent cotranslational protein targeting to membrane	Trafficking/Signaling
827	Respiratory electron transport	Respiratory electron transport	Metabolism
1005	Regulation of APC/C activators between G1/S and early anaphase	Regulation of APC/C activators between G1/S and early anaphase	Cell Cycle
1149	CTLA4 inhibitory signaling	CTLA4 inhibitory signaling	Immunity
506	Hippo signaling cascade	Signaling by Hippo	Trafficking/Signaling
303	IKK complex recruitment mediated by RIP1	IKK complex recruitment mediated by RIP1	Immunity
254	Insulin Pathway	Insulin receptor signalling cascade	Insulin
661	LKB1 signaling events	Energy dependent regulation of mTOR by LKB1-AMPK	Amino Acids
467	ARMS-mediated activation	ARMS-mediated activation	Trafficking/Signaling
297	Signaling by ERBB2	Signaling by ERBB2	Trafficking/Signaling
417	Deadenylation of mRNA	Deadenylation of mRNA	Ribosome
15	Free fatty acid receptors	Free fatty acids regulate insulin secretion	Insulin
846	JNK (c-Jun kinases) phosphorylation and activation mediated by activated human TAK1	JNK (c-Jun kinases) phosphorylation and activation mediated by activated human TAK1	Trafficking/Signaling
565	Antigen Presentation Folding assembly and peptide loading of class I MHC	Antigen Presentation: Folding, assembly and peptide loading of class I MHC	Immunity
1039	Glutathione synthesis and recycling	Glutathione synthesis and recycling	Metabolism
726	Alcohol catabolism	Ethanol oxidation	Metabolism
713	role of parkin in ubiquitin-proteasomal pathway	PINK1-PRKN Mediated Mitophagy	Trafficking/Signaling
550	GABA A receptor activation	GABA receptor activation	Trafficking/Signaling
967	Anchoring fibril formation	Anchoring of the basal body to the plasma membrane	Adhesion
358	Processing of Intronless Pre-mRNAs	Processing of Intronless Pre-mRNAs	Ribosome
778	RNA Pol II CTD phosphorylation and interaction with CE	RNA Pol II CTD phosphorylation and interaction with CE	Ribosome
539	Vitamin C ascorbate metabolism	Vitamin C (ascorbate) metabolism	Metabolism
690	mRNA Decay by 5 to 3 Exoribonuclease	mRNA decay by 5' to 3' exoribonuclease	Ribosome
322	G alpha q signalling events	G alpha (q) signalling events	Trafficking/Signaling
916	Condensation of Prometaphase Chromosomes	Condensation of Prometaphase Chromosomes	DNA
868	Zinc efflux and compartmentalization by the SLC30 family	Zinc influx into cells by the SLC39 gene family	Metabolism
361	Creatine metabolism	Creatine metabolism	Metabolism
1186	Interleukin-6 signaling	Interleukin-6 signaling	Interleukin-6
733	Peptide hormone biosynthesis	Peptide hormone metabolism	Metabolism
954	Processive synthesis on the C-strand of the telomere	Processive synthesis on the C-strand of the telomere	DNA
766	Adherens junctions interactions	Adherens junctions interactions	Adhesion
657	Negative regulation of the PI3K/AKT network	Negative regulation of the PI3K/AKT network	Trafficking/Signaling
324	G alpha i signalling events	G alpha (i) signalling events	Trafficking/Signaling
1088	Interferon alpha/beta signaling	Interferon Signaling	Immunity
1345	agrin in postsynaptic differentiation	Cargo trafficking to the periciliary membrane	Trafficking/Signaling
964	Molecules associated with elastic fibres	Molecules associated with elastic fibres	Adhesion
371	Glycogen breakdown glycogenolysis	Glycogen metabolism	Metabolism
245	EPHA2 forward signaling	EPH-Ephrin signaling	Adhesion
901	EphrinA-EPHA pathway	EPH-Ephrin signaling	Adhesion
816	Calcineurin-regulated NFAT-dependent transcription in lymphocytes	Calcineurin activates NFAT	Immunity
710	nfat and hypertrophy of the heart	Calcineurin activates NFAT	Immunity
312	RAF activation	RAF activation	Trafficking/Signaling
282	APC-Cdc20 mediated degradation of Nek2A	APC-Cdc20 mediated degradation of Nek2A	APC-Cdc20
108	NOD1/2 Signaling Pathway	NOD1/2 Signaling Pathway	Immunity
31	EPHA forward signaling	EPHA-mediated growth cone collapse	Trafficking/Signaling
1228	alpha-linolenic acid ALA metabolism	alpha-linolenic acid (ALA) metabolism	Metabolism
723	Glucuronidation	Glucuronidation	Metabolism
1040	Glutathione conjugation	Glutathione conjugation	Metabolism
291	Signaling by SCF-KIT	Signaling by SCF-KIT	Trafficking/Signaling
230	Adenylate cyclase inhibitory pathway	Adenylate cyclase inhibitory pathway	Trafficking/Signaling
1366	Nuclear signaling by ERBB4	Nuclear signaling by ERBB4	Trafficking/Signaling
738	ERKs are inactivated	ERKs are inactivated	Trafficking/Signaling
962	Activation of Matrix Metalloproteinases	Activation of Matrix Metalloproteinases	Adhesion
753	Amino acid transport across the plasma membrane	Amino acid transport across the plasma membrane	Amino Acids
1087	Nephrin interactions	Nephrin family interactions	Adhesion
369	Gluconeogenesis	Gluconeogenesis	Metabolism
276	Branched-chain amino acid catabolism	Branched-chain amino acid catabolism	Amino Acids
877	DNA Damage Recognition in GG-NER	DNA Damage Recognition in GG-NER	DNA
787	Dissolution of Fibrin Clot	Dissolution of Fibrin Clot	Adhesion
866	Metal ion SLC transporters	Metal ion SLC transporters	Trafficking/Signaling
665	CDC42 signaling events	CDC42 GTPase cycle	Trafficking/Signaling
1051	Phosphorylation of the APC/C	Phosphorylation of the APC/C	Trafficking/Signaling
273	Nicotinamide salvaging	Nicotinamide salvaging	Metabolism
591	FoxO family signaling	FOXO-mediated transcription	Nuclear
781	RNA Polymerase II Promoter Escape	RNA Polymerase II Promoter Escape	Ribosome
167	Sphingolipid de novo biosynthesis	Sphingolipid de novo biosynthesis	Metabolism
1259	Eukaryotic Translation Termination	Eukaryotic Translation Termination	Ribosome
948	Heme biosynthesis	Heme biosynthesis	Metabolism
115	Cyclin D associated events in G1	Cyclin D associated events in G1	Cell Cycle
456	Synthesis of IPs in the nucleus	Synthesis of PIPs in the nucleus	Nuclear
[truncated: 25 more columns]
