# Supplementary material for: Genetic Ablation and Multi-Omics Profiling Reveal CEP55 as a Key Driver of Tumorigenesis in Diverse Cancer Models
Source: Research Square preprint supplement (doi:10.21203/rs.3.rs-8060108/v1), 2025-11-28
Supplement: Supplementary file 2 [file 7a826b9891e92d2ed7e3433a.xlsx]

## Sheet: Sheet1
Gene_name	avg_log2FC	pct.1	pct.2	p_val [NB]	p_val [POS]	p_val [WCR]	p_val [MAST]	neglog10P [NB]	p_CP05	p_CP07	p_CP20	p_P03	p_P13
Cst3	-1.23695	1	1	3.70304e-169	0	1.6963e-107	3.69144e-122	168.431	1	1	1	1	1
Ighg2b	4.00298	0.639	0.519	1.16198e-102	0	8.22664e-24	3.12391e-66	101.935	0.55303	0.210256	1	0.565789	0.488372
Ppt1	-1.27646	0.932	0.991	6.18341e-91	3.59085e-218	6.53007e-67	5.41349e-75	90.2088	0.833333	0.964103	0.917391	0.991228	0.991279
Ighg3	3.85715	0.592	0.39	3.64778e-80	0	3.2681e-27	4.97944e-52	79.438	0.265152	0.312821	0.986957	0.412281	0.375
Igha	2.95928	0.743	0.503	6.38412e-80	0	7.91086e-47	2.2041e-69	79.1949	0.901515	0.317949	1	0.324561	0.622093
Pten	3.74729	0.591	0.105	2.11614e-76	1.02579e-91	4.50119e-72	4.04883e-81	75.6745	0.954545	0.128205	0.773913	0.109649	0.101744
Clta	-0.648449	1	1	4.17564e-73	1.24489e-133	2.60838e-63	4.79996e-64	72.3793	0.992424	1	1	1	1
Col1a2	-2.26164	0.806	0.801	2.37463e-72	0	3.80103e-06	2.33494e-15	71.6244	0.886364	0.738462	0.817391	0.872807	0.752907
Hist1h1a	-1.0337	0.973	1	4.85217e-72	0	1.86951e-41	4.07535e-47	71.3141	0.833333	0.989744	0.995652	1	1
H2-Aa	1.71048	0.828	0.766	6.33214e-69	1.68112e-229	1.57053e-37	1.05742e-63	68.1984	0.962121	0.512821	0.995652	0.807018	0.738372
Pdia3	-0.650699	0.998	1	2.27151e-62	9.03589e-124	2.83524e-56	5.14046e-56	61.6437	0.977273	0.994872	1	1	1
Ptms	-0.669664	0.98	0.997	1.90821e-57	1.68751e-106	2.34503e-39	4.42814e-38	56.7194	0.969697	0.969231	0.991304	1	0.994186
Jchain	1.96867	0.88	0.93	5.27905e-57	0	1.08039e-13	1.89234e-36	56.2774	0.848485	0.748718	0.995652	0.890351	0.956395
Arhgdib	0.952357	0.982	0.962	2.73221e-53	4.23183e-127	6.01368e-42	2.16378e-44	52.5635	0.954545	0.948718	1	0.964912	0.959302
Sem1	-0.661753	1	1	1.59035e-51	8.81466e-119	1.8621e-51	6.0096e-56	50.7985	0.977273	1	1	1	1
Ubc	0.953183	0.982	0.942	4.36077e-51	2.00347e-85	3.71054e-49	1.98718e-51	50.3604	0.992424	0.953846	1	0.947368	0.938953
Actb	-0.385842	1	1	7.53805e-51	0	4.67222e-49	2.71678e-41	50.1227	1	1	1	1	1
Mpeg1	-0.727338	0.973	0.986	4.89776e-50	2.43203e-95	3.45383e-36	1.94182e-37	49.31	0.909091	0.958974	0.982609	0.991228	0.982558
Hnrnpa2b1	-0.597871	0.998	1	1.04941e-49	3.11502e-118	4.03564e-49	4.15743e-53	48.9791	0.977273	0.994872	1	1	1
Hist4h4	-0.925276	0.959	0.998	1.05149e-49	1.38781e-139	1.08772e-35	1.09402e-39	48.9782	0.787879	0.989744	0.965217	1	0.997093
Cd207	-2.00218	0.278	0.656	1.29634e-49	1.14604e-72	2.1796e-47	2.02984e-51	48.8873	0.121212	0.569231	0.121739	0.618421	0.680233
Tmsb4x	-0.378901	1	1	6.19048e-49	0	9.10106e-29	1.00993e-24	48.2083	1	1	1	1	1
Gpx1	0.394776	0.998	1	7.00434e-49	6.7002e-196	1.15149e-11	3.1392e-12	48.1546	0.992424	0.994872	1	1	1
Igkc	1.57034	1	1	1.45751e-48	0	3.98128e-12	4.66414e-12	47.8364	0.992424	1	1	1	1
Gusb	-0.716001	0.968	0.993	6.42491e-48	1.57246e-76	6.43715e-33	1.40184e-34	47.1921	0.871212	0.974359	0.973913	0.991228	0.994186
Irf8	-0.674022	0.953	0.991	2.36961e-47	1.22019e-89	1.55737e-28	1.25594e-27	46.6253	0.909091	0.938462	0.952174	0.995614	0.988372
Col1a1	-2.23693	0.598	0.556	6.02329e-45	0	0.118227	2.65776e-14	44.2202	0.893939	0.487179	0.521739	0.600877	0.526163
Iglc1	1.80309	0.842	0.752	2.12431e-44	0	1.31557e-39	1.28177e-54	43.6728	0.94697	0.569231	0.986957	0.785088	0.729651
S100a9	1.12023	0.842	0.823	1.12824e-43	0	1.24501e-15	6.39971e-23	42.9476	0.462121	0.902564	0.965217	0.732456	0.883721
Trp53inp1	1.45792	0.785	0.577	2.25099e-40	1.53706e-73	1.40766e-32	3.77668e-40	39.6476	0.795455	0.517949	0.978261	0.644737	0.531977
Naaa	-0.958706	0.781	0.871	3.1347e-40	5.59385e-77	4.03432e-23	3.61954e-28	39.5038	0.734848	0.758974	0.795652	0.903509	0.848837
Eef2	-0.437007	1	1	1.44005e-38	1.42976e-75	4.30495e-42	5.89636e-42	37.8416	0.984848	1	1	1	1
Col3a1	-2.04467	0.662	0.554	1.71609e-38	0	0.268867	1.47772e-12	37.7655	0.909091	0.507692	0.656522	0.583333	0.534884
Fcmr	2.44723	0.492	0.145	3.56235e-38	2.04695e-44	3.55328e-40	1.07636e-43	37.4483	0.666667	0.210256	0.630435	0.192982	0.113372
Tra2a	-0.671425	0.962	0.993	5.77434e-37	2.99825e-49	2.41618e-39	5.42536e-41	36.2385	0.94697	0.969231	0.943478	1	0.988372
Ighd	1.57418	0.801	0.708	7.82569e-37	2.49438e-156	2.5281e-25	2.63931e-39	36.1065	0.931818	0.507692	0.934783	0.736842	0.688953
Dnase1l3	-0.80631	0.795	0.885	9.33103e-37	3.38356e-67	1.07668e-18	1.80045e-20	36.0301	0.795455	0.712821	0.813043	0.885965	0.883721
Coch	1.39912	0.786	0.579	2.96807e-36	2.17275e-95	2.19048e-24	3.46757e-29	35.5275	0.765152	0.6	0.913043	0.618421	0.552326
Ighm	1.33837	0.996	1	6.22426e-36	0	1.12789e-11	1.10574e-11	35.2059	0.977273	0.989744	1	1	1
Tap2	-0.451191	0.987	0.995	2.38082e-35	3.58477e-53	2.03903e-21	2.04142e-20	34.6233	0.939394	0.974359	0.991304	0.995614	0.994186
Ctsl	-1.24425	0.833	0.839	2.76841e-35	4.35362e-202	0.0111975	4.01681e-06	34.5578	0.916667	0.748718	0.86087	0.811404	0.857558
Ypel3	0.924629	0.914	0.85	6.90048e-35	1.46808e-57	1.67845e-33	2.36558e-39	34.1611	0.984848	0.753846	1	0.837719	0.857558
Rsad2	0.995813	0.639	0.43	1.66738e-34	1.75386e-52	1.39344e-16	6.30637e-17	33.778	0.431818	0.692308	0.704348	0.442982	0.421512
Dnajb1	-0.854335	0.871	0.979	3.22859e-34	4.04591e-45	9.27439e-39	3.05496e-41	33.491	0.848485	0.953846	0.773913	0.95614	0.994186
Oaz1	-0.50798	1	1	8.35848e-34	3.54824e-54	2.07386e-32	1.53016e-32	33.0779	1	1	1	1	1
Cd55	2.62694	0.433	0.105	3.20474e-33	6.38362e-36	2.3763e-38	8.6161e-42	32.4942	0.659091	0.189744	0.508696	0.127193	0.0901163
Hist1h1b	-0.815513	0.873	0.986	5.91913e-33	1.67794e-50	1.16406e-31	7.74301e-35	32.2277	0.590909	0.989744	0.873913	0.986842	0.985465
Gpcpd1	1.11983	0.795	0.476	6.11422e-33	1.66639e-39	4.8695e-34	4.73439e-35	32.2137	0.840909	0.697436	0.834783	0.517544	0.447674
H2-D1	-0.231234	1	1	9.02074e-33	5.29785e-72	1.81897e-09	3.51917e-07	32.0448	1	1	1	1	1
Rasa3	1.53077	0.648	0.323	2.2442e-32	2.14864e-39	9.54458e-35	1.82365e-36	31.6489	0.871212	0.364103	0.76087	0.372807	0.290698
Slc40a1	0.949112	0.81	0.587	6.45172e-32	1.12828e-54	1.68674e-21	1.54088e-22	31.1903	0.666667	0.774359	0.9	0.539474	0.619186
Itgad	1.5227	0.508	0.226	1.28132e-31	3.35999e-42	1.76995e-25	1.57866e-25	30.8923	0.424242	0.4	0.647826	0.258772	0.203488
Rasgrp2	1.51197	0.688	0.407	1.38797e-31	9.3987e-54	8.32301e-31	2.10584e-34	30.8576	0.871212	0.405128	0.813043	0.425439	0.395349
Ifitm3	1.5225	0.677	0.337	1.96544e-31	8.06849e-49	1.06562e-36	1.73885e-37	30.7065	0.810606	0.353846	0.869565	0.346491	0.331395
Atp5a1	-0.45112	0.998	1	2.28926e-31	1.78965e-47	4.40133e-37	2.52127e-36	30.6403	0.992424	0.994872	1	1	1
H2afz	-0.5132	1	1	2.4786e-31	1.05995e-56	2.97869e-32	6.31028e-35	30.6058	0.962121	1	1	1	1
Gnb2	0.771599	0.955	0.857	6.24948e-31	2.18205e-42	6.39388e-37	3.44229e-37	30.2042	0.984848	0.876923	1	0.885965	0.837209
Lst1	1.42021	0.645	0.316	6.28592e-31	1.04973e-36	3.50318e-33	8.15363e-34	30.2016	0.689394	0.507692	0.734783	0.320175	0.313953
Psap	-0.393082	0.998	1	8.1545e-31	9.24889e-202	0.00109356	0.000149737	30.0886	1	0.994872	1	1	1
Irf5	-0.606182	0.808	0.871	1.44432e-30	7.45855e-42	5.78488e-16	6.93371e-18	29.8403	0.833333	0.671795	0.865217	0.885965	0.860465
Shisa5	1.40426	0.709	0.442	1.64975e-30	1.53357e-48	1.90006e-28	1.56887e-31	29.7826	0.848485	0.4	0.878261	0.451754	0.436047
Kdm6a	1.2198	0.724	0.355	2.11446e-30	3.27314e-35	4.75066e-35	1.17273e-36	29.6748	0.689394	0.723077	0.743478	0.372807	0.343023
Luc7l3	-0.595992	0.957	0.998	1.005e-29	2.4632e-38	4.94439e-29	1.0819e-30	28.9978	0.916667	0.964103	0.93913	0.995614	1
Arhgdia	-0.301784	0.998	1	1.2077e-29	2.21056e-46	2.24018e-15	4.549e-14	28.918	0.984848	0.994872	1	1	1
Hist2h2bb	-0.622022	0.996	1	1.45766e-29	1.11109e-108	9.83276e-24	2.79532e-28	28.8363	0.94697	0.989744	1	1	1
Ccl5	1.37572	0.822	0.75	2.2893e-29	1.71419e-119	7.16561e-27	1.15308e-40	28.6403	0.863636	0.523077	1	0.723684	0.767442
Pim1	0.590822	0.923	0.76	3.52861e-29	1.1276e-43	5.67061e-17	1.45503e-18	28.4524	0.787879	0.958974	0.926087	0.824561	0.718023
H2-T23	1.03915	0.826	0.668	3.75901e-29	6.62343e-42	6.42083e-28	6.66395e-32	28.4249	0.916667	0.579487	0.965217	0.745614	0.616279
Uqcr11	-0.704041	0.912	0.977	6.8261e-29	5.50931e-35	9.69371e-32	1.51474e-33	28.1658	0.840909	0.974359	0.882609	0.97807	0.976744
Actr3	-0.497056	0.977	0.993	1.11437e-28	4.26054e-51	1.20065e-23	2.72184e-23	27.953	0.954545	0.989744	0.96087	0.991228	0.994186
Srrt	-0.540068	0.986	0.998	1.19155e-28	5.44972e-39	3.48205e-32	1.45633e-32	27.9239	0.931818	0.984615	0.982609	1	0.997093
Klf2	1.29937	0.732	0.497	1.57513e-28	1.4669e-47	9.82725e-28	1.06963e-31	27.8027	0.969697	0.461538	0.813043	0.508772	0.488372
Msl1	-0.588159	0.941	0.986	2.05482e-28	2.59211e-37	6.06569e-28	5.90213e-28	27.6872	0.916667	0.969231	0.904348	0.986842	0.985465
Spn	1.03159	0.826	0.608	3.17614e-28	2.24825e-38	1.25395e-28	2.54216e-30	27.4981	0.848485	0.702564	0.9	0.618421	0.601744
Tcf25	-0.590836	0.975	0.997	3.93948e-28	1.71642e-38	5.10477e-30	1.73059e-30	27.4046	0.94697	1	0.96087	0.991228	1
B2m	0.599635	0.998	1	4.88482e-28	9.77919e-130	9.15067e-29	9.79917e-25	27.3112	1	0.994872	1	1	1
Ghitm	-0.572513	0.982	1	4.90263e-28	1.57762e-36	7.50757e-31	3.32124e-32	27.3096	0.931818	0.989744	0.982609	1	1
Jund	0.904262	0.873	0.792	7.67012e-28	1.15833e-39	7.56607e-25	1.45918e-30	27.1152	0.94697	0.671795	0.973913	0.815789	0.776163
Tent5c	0.314005	0.88	0.846	1.0128e-27	2.90219e-41	0.000364614	0.000821583	26.9945	0.590909	0.974359	0.908696	0.798246	0.877907
Txndc15	-0.814881	0.727	0.879	2.62988e-27	1.54604e-36	7.18714e-27	7.9641e-28	26.5801	0.704545	0.825641	0.656522	0.868421	0.886628
Tmem128	-0.663369	0.865	0.974	5.67521e-27	5.74765e-31	2.50357e-28	9.19717e-30	26.246	0.840909	0.938462	0.782609	0.969298	0.976744
Bin2	1.39042	0.666	0.346	5.99199e-27	1.022e-35	9.83648e-32	2.71141e-32	26.2224	0.80303	0.379487	0.826087	0.421053	0.296512
Kctd12	-0.615444	0.855	0.893	1.23798e-26	2.77459e-37	3.90387e-17	1.81896e-20	25.9073	0.848485	0.805128	0.856522	0.921053	0.875
Lrch4	-0.541216	0.955	0.986	1.41995e-26	6.08669e-41	9.70509e-24	1.45987e-23	25.8477	0.916667	0.984615	0.913043	0.982456	0.988372
Fkbp8	-0.552797	0.996	0.998	2.1079e-26	2.45322e-40	7.32476e-31	1.37266e-29	25.6762	0.977273	1	0.991304	0.995614	1
Clec9a	-1.22542	0.42	0.605	2.29844e-26	5.02605e-39	2.23005e-19	2.33372e-27	25.6386	0.371212	0.415385	0.452174	0.666667	0.563953
Nop53	-0.559036	0.941	0.988	2.50833e-26	3.91818e-34	5.37073e-21	1.50938e-21	25.6006	0.863636	0.958974	0.93913	0.991228	0.985465
Spic	1.79484	0.474	0.177	2.72275e-26	2.13288e-33	2.55205e-28	9.60868e-29	25.565	0.462121	0.261538	0.66087	0.192982	0.165698
Psmd14	-0.613154	0.934	0.988	4.15496e-26	7.31475e-33	1.42241e-32	3.23865e-33	25.3814	0.840909	0.984615	0.904348	0.991228	0.985465
Atp2a2	-0.595534	0.964	1	4.56938e-26	1.62155e-37	2.68196e-33	1.97819e-35	25.3401	0.94697	0.994872	0.93913	1	1
Cd47	0.338398	0.996	0.995	6.49619e-26	6.73906e-34	2.45006e-16	1.34784e-16	25.1873	0.969697	0.989744	1	0.995614	0.994186
Cd53	1.29371	0.691	0.414	6.91082e-26	2.27648e-38	1.35017e-27	1.84024e-28	25.1605	0.80303	0.394872	0.86087	0.473684	0.375
Tbc1d9	-0.794617	0.725	0.846	7.44347e-26	2.48174e-34	8.14558e-22	1.99035e-24	25.1282	0.689394	0.758974	0.678261	0.885965	0.819767
Cxcl12	1.56276	0.551	0.255	7.86029e-26	1.12436e-38	3.23142e-27	6.81735e-28	25.1046	0.621212	0.317949	0.708696	0.298246	0.226744
U2af1	-0.697971	0.901	0.988	1.10006e-25	1.37165e-37	1.79475e-29	1.74092e-31	24.9586	0.818182	0.969231	0.852174	0.995614	0.982558
Eif4h	-0.564589	0.978	1	1.24522e-25	3.68348e-34	6.0239e-33	3.29983e-34	24.9048	0.924242	0.989744	0.965217	1	1
5031439G07Rik	-0.639734	0.772	0.871	1.50957e-25	1.54124e-30	2.26607e-18	1.09309e-19	24.8211	0.787879	0.738462	0.756522	0.885965	0.860465
Pf4	0.642883	0.822	0.755	1.83324e-25	2.19131e-150	3.85194e-05	4.28479e-05	24.7368	0.69697	0.805128	0.891304	0.649123	0.825581
Mpp1	1.30582	0.558	0.264	2.54194e-25	5.43098e-31	1.40523e-24	1.78515e-24	24.5948	0.5	0.487179	0.652174	0.241228	0.27907
Mapk1	-0.530042	0.98	0.995	3.40272e-25	1.73856e-33	6.40012e-27	2.9246e-26	24.4682	0.909091	0.989744	0.969565	1	0.991279
Hemgn	0.584255	0.673	0.526	3.89746e-25	1.62853e-42	8.77418e-09	4.79558e-08	24.4092	0.424242	0.866667	0.630435	0.47807	0.55814
Rab1a	-0.494407	0.993	0.998	7.08334e-25	9.63488e-34	9.13503e-29	1.2189e-28	24.1498	0.984848	1	0.986957	1	0.997093
Vcam1	1.07937	0.729	0.49	7.99079e-25	4.58467e-40	3.80269e-23	2.77997e-24	24.0974	0.742424	0.517949	0.878261	0.592105	0.421512
Mbnl1	0.868413	0.901	0.657	9.07188e-25	4.54562e-32	4.76403e-32	6.05863e-33	24.0423	0.924242	0.815385	0.93913	0.710526	0.622093
Cd74	-0.192393	1	1	1.61608e-24	0	0.00542198	0.00328347	23.7915	1	1	1	1	1
Aif1	-0.538411	0.919	0.944	1.62133e-24	5.02263e-41	6.05542e-14	5.07781e-15	23.7901	0.840909	0.887179	0.930435	0.951754	0.938953
Gsr	0.761301	0.846	0.624	1.64158e-24	8.79181e-31	1.34888e-22	1.0137e-22	23.7847	0.765152	0.841026	0.878261	0.622807	0.625
Axl	0.645453	0.917	0.799	1.70149e-24	2.96382e-41	2.04231e-19	5.95605e-19	23.7692	0.840909	0.897436	0.956522	0.763158	0.822674
Sec11c	-0.41487	1	1	1.70802e-24	8.58349e-55	1.31603e-25	5.23969e-25	23.7675	0.94697	1	1	1	1
Rbm39	1.04341	0.761	0.531	2.45957e-24	5.94085e-30	1.18748e-26	2.60145e-28	23.6091	0.886364	0.533333	0.869565	0.574561	0.502907
Ube2o	0.77951	0.618	0.39	2.65345e-24	9.64991e-30	3.30169e-14	5.24363e-14	23.5762	0.439394	0.687179	0.665217	0.394737	0.386628
Psmb3	-0.568916	0.955	0.995	2.65865e-24	1.61129e-32	2.82436e-31	2.53965e-31	23.5753	0.924242	0.989744	0.908696	1	0.991279
Xpo7	0.560999	0.788	0.656	3.74281e-24	3.02853e-33	1.36479e-09	2.53404e-09	23.4268	0.681818	0.820513	0.795652	0.618421	0.680233
Calm2	-0.527692	0.987	0.998	4.03665e-24	1.14536e-37	4.71885e-33	6.66199e-33	23.394	0.94697	0.994872	0.986957	0.995614	1
Rnf10	0.54418	0.93	0.816	4.09264e-24	2.01048e-31	4.31757e-16	6.69085e-16	23.388	0.909091	0.882051	0.969565	0.798246	0.828488
Gdi2	-0.412155	0.978	0.984	4.76344e-24	7.67319e-33	7.99469e-11	2.21194e-11	23.3221	0.94697	0.979487	0.978261	0.995614	0.976744
Cct2	-0.504264	0.975	1	5.90994e-24	3.94206e-36	5.63891e-28	1.11282e-28	23.2284	0.939394	0.989744	0.96087	1	1
Atp5c1	-0.572203	0.941	0.998	8.20586e-24	9.50114e-31	5.65281e-32	9.78457e-35	23.0859	0.886364	0.989744	0.921739	0.995614	1
Ccr3	1.94523	0.359	0.114	8.24238e-24	4.15041e-28	4.39982e-23	2.07038e-23	23.0839	0.356061	0.251282	0.452174	0.144737	0.0930233
Tbrg1	-0.576271	0.91	0.979	1.06623e-23	4.04015e-29	1.43834e-22	1.15941e-23	22.9721	0.840909	0.923077	0.895652	0.995614	0.968023
Ndufv3	-0.565285	0.944	0.99	1.23385e-23	1.12235e-31	2.57461e-29	1.0238e-29	22.9087	0.886364	0.994872	0.926087	0.986842	0.991279
Leng8	0.884854	0.869	0.654	2.1606e-23	7.48418e-30	4.64658e-30	1.20044e-29	22.6654	0.916667	0.753846	0.930435	0.671053	0.642442
Hist1h3d	-0.698113	0.996	1	2.48814e-23	4.83081e-121	5.14029e-20	4.91502e-22	22.6041	0.954545	0.989744	1	1	1
Eif4b	-0.36431	1	1	2.70828e-23	1.02488e-43	2.44271e-25	5.93377e-24	22.5673	1	1	1	1	1
Atf4	-0.613895	0.959	0.997	2.93692e-23	2.84392e-28	8.35435e-30	6.88904e-31	22.5321	0.863636	1	0.934783	1	0.994186
Tcp11l2	0.592365	0.908	0.829	5.90458e-23	9.2905e-29	2.07895e-18	1.32334e-18	22.2288	0.924242	0.851282	0.921739	0.789474	0.854651
Mfge8	-0.478054	0.709	0.71	6.67934e-23	7.68287e-80	0.0604693	0.00171963	22.1753	0.878788	0.476923	0.782609	0.75	0.68314
Tln1	0.503807	0.991	0.977	1.07536e-22	3.79923e-33	1.7701e-24	1.4945e-23	21.9684	0.962121	0.979487	0.995652	0.982456	0.973837
Nadk	-0.510159	0.978	0.998	1.363e-22	1.20385e-32	2.14497e-26	2.77697e-25	21.8655	0.962121	1	0.965217	0.995614	1
Tpt1	0.563442	1	1	1.51254e-22	7.04805e-133	3.49899e-26	5.24384e-27	21.8203	1	1	1	1	1
Ube2d3	-0.312706	1	1	1.69057e-22	4.06539e-31	3.40881e-18	2.45013e-16	21.772	0.992424	1	1	1	1
Clec2d	0.918718	0.826	0.797	2.41893e-22	2.57651e-43	3.8896e-20	1.78368e-32	21.6164	0.992424	0.512821	0.991304	0.842105	0.767442
Kif21b	1.60602	0.519	0.247	2.91918e-22	1.25725e-29	5.95538e-25	2.28562e-26	21.5347	0.787879	0.261538	0.582609	0.337719	0.186047
Rp9	1.20354	0.63	0.313	5.24379e-22	4.30648e-26	1.55166e-27	2.12788e-27	21.2804	0.621212	0.610256	0.652174	0.346491	0.290698
Rnf187	-0.53003	0.993	1	7.94335e-22	2.30279e-32	2.67403e-27	5.10305e-28	21.1	0.931818	0.989744	0.995652	1	1
Pak1	-0.838949	0.616	0.743	8.74368e-22	2.63367e-27	5.42646e-17	2.23169e-22	21.0583	0.55303	0.6	0.643478	0.767544	0.726744
Ppp1r11	-0.616166	0.743	0.79	9.05818e-22	1.09949e-25	4.78349e-12	1.26388e-18	21.043	0.757576	0.717949	0.734783	0.868421	0.738372
Rgl1	1.20677	0.652	0.371	1.92382e-21	2.93817e-27	7.57506e-26	6.83255e-26	20.7158	0.787879	0.435897	0.756522	0.425439	0.334302
4933434E20Rik	-0.566876	0.925	0.974	2.15474e-21	2.76443e-27	2.04214e-21	7.05668e-22	20.6666	0.924242	0.917949	0.9	0.973684	0.973837
Fam111a	-0.476028	0.968	0.998	2.17148e-21	3.63228e-36	8.74612e-21	1.01378e-20	20.6632	0.863636	0.989744	0.943478	1	0.997093
Adam8	-1.1391	0.397	0.519	2.90224e-21	4.658e-34	7.20098e-11	2.94184e-21	20.5373	0.333333	0.430769	0.404348	0.508772	0.526163
Mia2	-0.567893	0.932	0.984	3.40675e-21	8.26442e-25	1.64711e-25	5.85352e-26	20.4677	0.856061	0.984615	0.882609	0.973684	0.991279
Copz1	-0.603506	0.928	0.99	4.01857e-21	2.39605e-26	5.36975e-28	8.03308e-29	20.3959	0.871212	0.958974	0.9	0.995614	0.985465
Kcnj10	1.40091	0.438	0.184	5.90917e-21	6.69043e-23	2.70345e-21	1.23759e-20	20.2285	0.439394	0.338462	0.521739	0.201754	0.171512
Hnrnpf	-0.55627	0.908	0.965	8.40789e-21	1.07658e-26	2.26934e-20	2.27038e-20	20.0753	0.893939	0.902564	0.882609	0.964912	0.965116
Cxcr4	0.950988	0.718	0.441	9.68778e-21	2.67676e-24	6.88876e-23	4.96523e-23	20.0138	0.719697	0.676923	0.747826	0.486842	0.409884
Gsk3a	1.61059	0.442	0.156	1.10123e-20	1.04782e-21	2.46123e-26	5.50123e-26	19.9581	0.522727	0.297436	0.517391	0.162281	0.151163
Laptm5	0.823463	0.923	0.907	1.40898e-20	8.28558e-53	3.90105e-22	2.63331e-26	19.8511	0.954545	0.784615	1	0.921053	0.898256
Slpi	-0.74673	0.93	0.995	1.66098e-20	0	1.09017e-08	1.91227e-15	19.7796	0.727273	0.964103	0.995652	0.995614	0.994186
Dcaf12	0.863978	0.724	0.446	1.93204e-20	2.72714e-26	4.81101e-20	2.57986e-21	19.714	0.719697	0.661538	0.769565	0.47807	0.424419
Sptan1	1.51083	0.488	0.213	2.10072e-20	3.03751e-21	2.02447e-24	7.38249e-25	19.6776	0.727273	0.225641	0.573913	0.263158	0.180233
Ripor2	1.27836	0.619	0.385	2.13403e-20	2.22144e-30	6.51754e-22	8.38787e-25	19.6708	0.825758	0.451282	0.643478	0.394737	0.377907
Eif3h	-0.473746	0.966	0.988	2.13738e-20	6.56855e-27	1.39084e-19	2.43551e-19	19.6701	0.94697	0.989744	0.943478	0.995614	0.982558
Ctsz	-0.286429	0.984	0.988	2.42548e-20	7.89567e-39	0.000382034	0.0038711	19.6152	0.94697	0.958974	0.995652	0.995614	0.982558
Ctse	0.176135	0.824	0.776	2.56495e-20	1.76149e-37	0.0707727	0.121264	19.5909	0.522727	0.923077	0.843478	0.662281	0.851744
Krtcap2	1.12647	0.691	0.407	2.74692e-20	1.70794e-24	3.03174e-26	4.23977e-26	19.5612	0.780303	0.482051	0.817391	0.381579	0.424419
Smchd1	1.14906	0.662	0.374	2.99872e-20	3.87967e-25	8.30512e-26	1.21493e-25	19.5231	0.795455	0.466667	0.752174	0.390351	0.363372
Cdc34	-0.67778	0.806	0.942	4.59499e-20	7.85244e-27	1.31503e-25	3.90512e-26	19.3377	0.727273	0.958974	0.7	0.986842	0.912791
Tpm1	0.6172	0.81	0.617	4.92283e-20	9.79086e-31	2.90141e-13	7.1302e-14	19.3078	0.772727	0.887179	0.752174	0.539474	0.668605
Pecam1	1.40298	0.542	0.227	6.31984e-20	5.01248e-22	1.33493e-27	1.15053e-27	19.1993	0.765152	0.317949	0.604348	0.29386	0.18314
Zeb2	1.3098	0.583	0.299	7.4785e-20	2.00917e-26	8.92734e-25	8.5006e-25	19.1262	0.810606	0.292308	0.704348	0.359649	0.258721
Atp5e	-0.274188	1	1	8.24875e-20	3.84636e-32	1.92395e-15	2.35752e-12	19.0836	1	1	1	1	1
Pgam1	-0.500321	0.966	0.972	1.21508e-19	6.94e-37	7.04657e-16	2.81269e-17	18.9154	0.954545	0.979487	0.965217	0.97807	0.968023
Hspd1	-0.534136	0.978	0.998	1.44491e-19	1.64599e-30	4.3391e-25	1.1809e-24	18.8402	0.962121	0.994872	0.973913	1	0.997093
Ighj4	1.01458	0.948	0.99	1.45846e-19	0	1.08947e-09	4.52243e-18	18.8361	0.924242	0.851282	1	0.982456	0.994186
Psmb9	-0.330982	0.962	0.981	1.63844e-19	1.65604e-40	5.97835e-05	0.000235497	18.7856	0.924242	0.917949	0.978261	0.995614	0.97093
Ppbp	0.893539	0.646	0.519	1.90132e-19	5.15184e-75	7.57614e-09	5.52249e-09	18.7209	0.416667	0.584615	0.8	0.434211	0.575581
Ctsd	-0.649997	0.973	0.995	2.65438e-19	4.68153e-97	0.714428	0.00305481	18.576	0.94697	0.979487	0.982609	0.991228	0.997093
Mfsd2b	1.20826	0.415	0.205	3.14328e-19	2.18846e-23	2.91459e-15	1.25681e-14	18.5026	0.242424	0.435897	0.495652	0.153509	0.238372
Lsm14a	1.01151	0.707	0.409	3.61201e-19	4.15362e-21	5.82908e-25	2.42172e-25	18.4423	0.80303	0.558974	0.778261	0.438596	0.389535
Anxa6	-0.387788	0.916	0.949	3.69378e-19	2.77761e-26	4.77585e-10	6.38994e-09	18.4325	0.969697	0.876923	0.913043	0.964912	0.938953
Cdr2	0.472128	0.7	0.556	3.94644e-19	1.0754e-23	4.9202e-07	8.50168e-07	18.4038	0.522727	0.779487	0.721739	0.504386	0.590116
Cyb5a	0.745089	0.831	0.656	4.01093e-19	2.16351e-27	1.35658e-17	4.19246e-18	18.3968	0.886364	0.723077	0.886957	0.618421	0.680233
Serp1	0.818967	0.851	0.699	8.1895e-19	1.65516e-26	3.00012e-24	7.96116e-25	18.0867	0.939394	0.625641	0.973913	0.77193	0.651163
Adipor1	0.643334	0.826	0.645	8.4012e-19	2.77555e-24	2.13915e-14	7.36481e-15	18.0757	0.848485	0.774359	0.847826	0.548246	0.709302
Fcer2a	1.8953	0.37	0.145	8.47074e-19	4.8399e-23	3.13995e-20	8.61043e-23	18.0721	0.606061	0.184615	0.391304	0.175439	0.125
Selenoh	-0.494741	0.95	0.99	9.44818e-19	1.41219e-27	5.92725e-21	5.39919e-21	18.0247	0.848485	0.984615	0.93913	0.995614	0.985465
Rap1b	0.431659	0.995	1	1.00003e-18	1.56939e-38	1.92017e-22	2.53786e-22	18	0.962121	0.984615	1	1	1
Pcx	1.58797	0.447	0.393	1.60033e-18	2.36051e-65	0.028042	0.000452369	17.7958	0.469697	0.728205	0.195652	0.381579	0.401163
Yy1	-0.481919	0.964	0.997	1.84512e-18	1.71184e-24	1.13129e-20	1.43743e-21	17.734	0.924242	0.989744	0.93913	0.995614	0.997093
Pdcd6ip	-0.459698	0.966	0.986	1.92469e-18	8.10101e-23	5.18508e-19	1.22857e-19	17.7156	0.931818	0.994872	0.930435	0.986842	0.985465
H13	0.99359	0.745	0.533	2.07167e-18	7.21266e-26	1.22341e-21	1.27694e-22	17.6837	0.772727	0.512821	0.913043	0.552632	0.520349
Aldh2	0.731333	0.908	0.806	2.27e-18	5.96306e-30	3.10013e-19	1.05762e-19	17.644	0.924242	0.835897	0.96087	0.846491	0.77907
Mef2c	1.43066	0.513	0.247	2.41054e-18	1.55727e-22	1.00736e-22	5.45843e-23	17.6179	0.628788	0.282051	0.643478	0.258772	0.238372
Nt5c3	0.312643	0.813	0.788	3.15191e-18	1.51604e-26	0.00116102	0.000485474	17.5014	0.666667	0.897436	0.782609	0.758772	0.80814
Gmfg	1.21113	0.589	0.32	4.17526e-18	4.50966e-23	7.12639e-23	9.02143e-23	17.3793	0.787879	0.364103	0.665217	0.342105	0.305233
Lrg1	1.23211	0.456	0.215	4.19045e-18	6.74633e-21	2.15901e-18	9.80002e-18	17.3777	0.234848	0.466667	0.573913	0.263158	0.18314
Ubr4	-0.538598	0.926	0.976	4.60256e-18	5.78246e-23	2.37711e-22	3.01371e-21	17.337	0.886364	0.969231	0.869565	0.97807	0.973837
Mif	-0.44776	0.914	0.963	4.74557e-18	3.3527e-22	1.50991e-14	2.8808e-14	17.3237	0.840909	0.938462	0.908696	0.982456	0.950581
Ctla2a	1.4402	0.454	0.205	4.92517e-18	5.89279e-25	1.50887e-20	2.37191e-20	17.3076	0.431818	0.266667	0.626087	0.201754	0.206395
Tmem165	-0.530416	0.939	0.972	5.8368e-18	1.34537e-25	2.50258e-18	7.06757e-19	17.2338	0.848485	0.948718	0.93913	0.964912	0.976744
Ighj1	0.932455	0.987	1	6.58505e-18	0	0.00129554	9.1915e-06	17.1814	0.954545	0.964103	1	1	1
Cnot1	-0.526878	0.874	0.941	6.82959e-18	1.14356e-21	1.93699e-17	9.27714e-18	17.1656	0.848485	0.928205	0.804348	0.947368	0.936047
Lpgat1	-0.440239	0.862	0.907	8.21856e-18	2.06878e-24	2.59797e-10	1.45826e-10	17.0852	0.893939	0.835897	0.834783	0.951754	0.877907
Ngp	0.701193	0.786	0.766	8.43346e-18	9.56751e-296	6.63869e-06	4.57893e-08	17.074	0.295455	0.917949	0.9	0.72807	0.790698
Nucks1	-0.489053	0.982	0.997	9.98037e-18	9.83424e-23	3.73249e-26	2.7104e-26	17.0009	0.916667	0.994872	0.973913	0.995614	0.997093
Cd79b	1.11572	0.811	0.801	1.09508e-17	2.26333e-93	2.85924e-18	1.69064e-33	16.9606	0.916667	0.497436	0.969565	0.79386	0.805233
Polr1d	-0.406997	0.95	0.97	1.1098e-17	1.7912e-23	1.98166e-11	1.09975e-11	16.9548	0.931818	0.953846	0.930435	0.986842	0.959302
Dgka	1.67156	0.469	0.224	1.17016e-17	1.96083e-30	1.78034e-20	2.57362e-21	16.9318	0.689394	0.210256	0.56087	0.263158	0.197674
Plgrkt	1.37163	0.492	0.238	1.24517e-17	2.94307e-19	9.63373e-22	4.20669e-22	16.9048	0.666667	0.276923	0.573913	0.285088	0.206395
Grap2	1.45832	0.49	0.234	1.35793e-17	2.73972e-22	8.29358e-21	2.32921e-21	16.8671	0.712121	0.261538	0.556522	0.263158	0.215116
Pcmtd2	1.33196	0.487	0.243	1.38046e-17	2.20517e-19	2.87259e-20	5.12341e-21	16.86	0.666667	0.307692	0.534783	0.245614	0.241279
2002-03-01	-0.495523	0.962	0.986	1.4079e-17	3.74232e-24	3.47061e-19	4.62601e-20	16.8514	0.977273	0.984615	0.930435	0.982456	0.988372
Slbp	-0.659539	0.876	0.979	1.61238e-17	3.70159e-21	3.05052e-26	1.02648e-27	16.7925	0.75	0.94359	0.847826	0.973684	0.982558
Npm1	-0.362608	0.996	1	1.64644e-17	1.23574e-29	1.17637e-17	7.99226e-17	16.7835	0.924242	1	1	1	1
Cd82	0.38945	0.977	0.951	1.64736e-17	5.86082e-22	2.10085e-14	2.88778e-13	16.7832	0.916667	0.969231	0.982609	0.938596	0.959302
Herpud1	-0.474146	0.898	0.939	1.82904e-17	5.57512e-21	7.11912e-16	1.53075e-15	16.7378	0.80303	0.933333	0.886957	0.921053	0.950581
Chst1	1.5652	0.431	0.21	1.8998e-17	2.0021e-24	3.43625e-18	3.89286e-20	16.7213	0.378788	0.205128	0.652174	0.175439	0.232558
Cd81	0.536165	0.968	0.955	2.08883e-17	1.7387e-25	5.90974e-21	1.43138e-21	16.6801	0.962121	0.928205	0.995652	0.95614	0.953488
Prkar2b	0.321999	0.732	0.678	2.19666e-17	1.15671e-27	0.00397682	0.00789049	16.6582	0.530303	0.871795	0.726087	0.605263	0.726744
Ifi27	0.928098	0.686	0.42	2.19703e-17	5.42468e-23	1.63764e-19	6.03035e-20	16.6582	0.734848	0.625641	0.708696	0.447368	0.401163
Atp6v0e	-0.367486	0.998	1	2.23294e-17	1.78644e-23	5.44188e-19	2.05856e-19	16.6511	0.969697	0.994872	1	1	1
Tmem14c	-0.653478	0.917	0.97	2.23409e-17	3.09014e-23	2.09433e-24	2.81711e-24	16.6509	0.833333	0.984615	0.873913	0.960526	0.976744
Blnk	-0.383772	0.824	0.846	2.32778e-17	6.35145e-36	8.40169e-05	2.68215e-05	16.6331	0.795455	0.676923	0.9	0.885965	0.819767
Snx2	1.17323	0.628	0.355	2.73766e-17	3.71589e-23	1.94002e-22	1.52569e-22	16.5626	0.795455	0.4	0.726087	0.372807	0.343023
Fcgr4	1.47038	0.363	0.157	2.7613e-17	9.11418e-22	3.47084e-16	3.51782e-16	16.5589	0.295455	0.179487	0.556522	0.166667	0.151163
Grn	-0.484437	0.935	0.963	2.94397e-17	1.57135e-30	1.83345e-10	2.1764e-11	16.5311	0.878788	0.928205	0.952174	0.951754	0.97093
Asap1	0.69241	0.781	0.563	3.11015e-17	1.14542e-20	9.57563e-18	3.00227e-17	16.5072	0.780303	0.738462	0.804348	0.513158	0.59593
Arl8a	-0.595188	0.713	0.809	3.44935e-17	2.56147e-21	2.1126e-12	1.11028e-13	16.4623	0.704545	0.748718	0.66087	0.824561	0.799419
Prkcq	1.85731	0.368	0.15	4.6637e-17	4.28539e-23	1.76859e-18	1.11253e-19	16.3313	0.522727	0.2	0.421739	0.210526	0.110465
Lmo2	0.782461	0.77	0.498	4.68957e-17	1.17735e-23	3.93081e-20	1.23253e-21	16.3289	0.69697	0.728205	0.830435	0.54386	0.468023
Mertk	0.978437	0.657	0.413	4.71107e-17	4.47022e-27	1.92888e-19	6.88995e-19	16.3269	0.598485	0.54359	0.782609	0.425439	0.40407
C1qc	0.92909	0.808	0.591	5.54306e-17	7.06882e-39	3.77166e-27	2.39332e-25	16.2563	0.840909	0.584615	0.978261	0.565789	0.607558
Camk2d	-0.457097	0.772	0.792	5.67576e-17	9.8719e-22	5.41967e-07	6.87097e-11	16.246	0.734848	0.723077	0.795652	0.842105	0.758721
Hist1h2bb	-0.569416	0.995	1	5.72227e-17	2.80628e-71	2.79182e-18	1.06838e-20	16.2424	0.924242	0.994872	1	1	1
Car1	0.149842	0.815	0.806	6.04215e-17	2.59451e-47	0.524131	0.797726	16.2188	0.492424	0.907692	0.852174	0.710526	0.869186
Vsir	1.35051	0.501	0.22	7.22182e-17	5.2476e-20	3.15511e-23	6.92435e-23	16.1414	0.583333	0.282051	0.63913	0.241228	0.206395
Ndufb6	-0.527541	0.961	0.984	7.59664e-17	1.96309e-21	2.86679e-22	2.50174e-22	16.1194	0.916667	0.984615	0.96087	0.964912	0.997093
Rabggtb	-0.609346	0.905	0.988	8.77209e-17	3.66697e-20	3.85511e-26	1.02431e-27	16.0569	0.833333	0.979487	0.83913	0.986842	0.988372
Nckap1l	1.28691	0.535	0.274	8.9849e-17	2.40915e-21	7.83556e-22	9.01611e-22	16.0465	0.659091	0.317949	0.647826	0.328947	0.238372
Naga	-0.629153	0.759	0.811	9.16799e-17	3.04398e-21	6.37985e-14	1.81126e-19	16.0377	0.704545	0.784615	0.730435	0.785088	0.828488
Tmem173	1.46979	0.451	0.198	9.23045e-17	8.18395e-18	2.09493e-21	1.9429e-21	16.0348	0.560606	0.25641	0.552174	0.241228	0.168605
Vars	-0.529316	0.946	0.995	9.36827e-17	1.1029e-23	5.27841e-23	2.23112e-25	16.0283	0.848485	0.989744	0.917391	0.995614	0.994186
Ptpn6	0.911287	0.77	0.605	1.0903e-16	1.94811e-25	3.63253e-18	8.79851e-20	15.9625	0.863636	0.533333	0.882609	0.684211	0.552326
Parvb	0.562317	0.706	0.577	1.11886e-16	3.2528e-36	1.40512e-06	2.28917e-06	15.9512	0.44697	0.830769	0.730435	0.486842	0.636628
Cavin2	1.24984	0.496	0.28	1.34846e-16	2.04504e-30	1.34702e-15	8.56316e-16	15.8702	0.590909	0.369231	0.547826	0.241228	0.305233
Prg2	1.47681	0.35	0.171	1.38364e-16	5.9889e-28	9.71734e-13	6.32767e-13	15.859	0.143939	0.235897	0.565217	0.157895	0.180233
Bach2	1.70273	0.381	0.154	1.43258e-16	3.26564e-20	1.95944e-19	3.17618e-20	15.8439	0.621212	0.220513	0.378261	0.179825	0.136628
Ttc7	-0.500758	0.873	0.937	1.43632e-16	2.42555e-19	9.4011e-18	2.6814e-17	15.8428	0.825758	0.948718	0.786957	0.929825	0.94186
Stard7	-0.463041	0.955	0.99	1.72483e-16	1.10281e-22	1.97114e-18	6.15126e-18	15.7633	0.94697	0.994872	0.917391	0.986842	0.991279
Ctcf	0.836552	0.724	0.514	1.75238e-16	9.45417e-19	2.6866e-18	1.99135e-18	15.7564	0.772727	0.646154	0.752174	0.530702	0.502907
Hnrnpa3	0.51677	0.978	0.9	2.05689e-16	1.05187e-19	1.84711e-20	8.56726e-21	15.6868	0.94697	0.953846	0.986957	0.925439	0.883721
Fam234b	0.887961	0.449	0.266	2.06889e-16	1.81691e-17	3.79511e-11	1.94297e-10	15.6843	0.393939	0.523077	0.417391	0.20614	0.305233
Gmip	-0.565829	0.711	0.806	2.25765e-16	1.26006e-21	2.00173e-11	2.64291e-12	15.6463	0.689394	0.687179	0.713043	0.837719	0.784884
Prrc2c	0.724677	0.862	0.703	2.34057e-16	5.79812e-19	1.37344e-18	5.65733e-19	15.6307	0.954545	0.702564	0.926087	0.710526	0.697674
Plekhm1	1.21065	0.533	0.257	2.94209e-16	2.24384e-17	1.22314e-22	7.42797e-22	15.5313	0.674242	0.358974	0.6	0.254386	0.258721
Grina	0.438659	0.858	0.722	3.014e-16	1.43769e-21	2.00384e-09	1.64657e-09	15.5209	0.810606	0.882051	0.869565	0.657895	0.764535
Wfdc17	1.3665	0.512	0.238	3.07064e-16	1.71622e-27	1.98254e-22	5.58103e-22	15.5128	0.393939	0.271795	0.782609	0.210526	0.255814
Pafah1b3	1.68405	0.366	0.142	3.08101e-16	1.09208e-17	1.80925e-19	3.69667e-20	15.5113	0.477273	0.179487	0.46087	0.179825	0.116279
Birc3	1.00764	0.68	0.451	3.49853e-16	8.32298e-22	3.33074e-21	1.46551e-21	15.4561	0.856061	0.466667	0.756522	0.52193	0.40407
Kdr	1.23474	0.483	0.206	3.52518e-16	6.50202e-19	5.37054e-22	5.78796e-22	15.4528	0.568182	0.364103	0.534783	0.188596	0.218023
S100a8	0.54373	0.804	0.815	3.53594e-16	2.77274e-208	0.00102097	3.82916e-06	15.4515	0.340909	0.907692	0.930435	0.72807	0.872093
Cnot6l	1.41327	0.461	0.201	3.66956e-16	2.5445e-17	6.2184e-22	1.82277e-21	15.4354	0.643939	0.220513	0.56087	0.27193	0.15407
Cotl1	0.739294	0.898	0.85	3.74712e-16	1.15548e-29	6.4353e-20	1.52995e-22	15.4263	0.931818	0.728205	0.991304	0.837719	0.857558
Usp15	0.82478	0.679	0.43	3.83562e-16	4.2109e-20	2.61862e-17	2.37213e-17	15.4162	0.643939	0.615385	0.752174	0.486842	0.392442
Qrich1	0.920075	0.707	0.453	4.20382e-16	9.95583e-19	2.26818e-20	1.87201e-20	15.3764	0.765152	0.558974	0.791304	0.47807	0.436047
Arhgap25	1.39477	0.46	0.213	4.70989e-16	7.60022e-18	4.48185e-20	3.80545e-20	15.327	0.568182	0.261538	0.565217	0.25	0.188953
Aldh1a1	0.824742	0.451	0.253	4.93312e-16	1.48086e-18	9.06133e-12	2.81152e-11	15.3069	0.272727	0.579487	0.443478	0.214912	0.27907
Rpe	-0.667855	0.648	0.795	6.37382e-16	3.33594e-17	6.05928e-17	3.25743e-17	15.1956	0.568182	0.774359	0.573913	0.846491	0.761628
Tubb1	1.09452	0.442	0.276	6.57198e-16	1.8341e-30	8.08288e-10	8.87194e-10	15.1823	0.340909	0.405128	0.530435	0.29386	0.264535
Cox5b	-0.396138	0.989	1	6.69243e-16	1.33824e-20	1.18467e-23	8.08516e-26	15.1744	0.954545	0.994872	0.991304	1	1
Hmox1	0.320036	0.941	0.941	6.9922e-16	7.96294e-39	0.000287751	0.000296686	15.1554	0.787879	0.948718	0.986957	0.890351	0.973837
Pilrb1	1.15093	0.433	0.206	7.70218e-16	2.15803e-17	3.24513e-16	1.19022e-15	15.1134	0.416667	0.312821	0.543478	0.219298	0.197674
Fbxo30	0.770642	0.492	0.294	7.87622e-16	1.13077e-17	5.42328e-11	6.50322e-11	15.1037	0.401515	0.528205	0.513043	0.298246	0.290698
Man1a	0.682231	0.917	0.892	8.31905e-16	4.19602e-27	5.11313e-18	8.12762e-21	15.0799	0.931818	0.784615	0.995652	0.846491	0.921512
Tmem9	-0.872451	0.709	0.829	8.6897e-16	2.35266e-21	3.87005e-20	3.70288e-22	15.061	0.530303	0.912821	0.595652	0.741228	0.886628
Cyb5b	-0.596378	0.727	0.832	9.3955e-16	1.49564e-19	1.55912e-14	4.9757e-15	15.0271	0.681818	0.8	0.682609	0.837719	0.828488
Papola	0.782877	0.81	0.617	9.61416e-16	1.68866e-18	1.34988e-18	5.07347e-19	15.0171	0.901515	0.697436	0.843478	0.671053	0.581395
Rasgrp1	1.64117	0.377	0.154	9.9977e-16	4.16417e-17	8.40554e-19	1.6239e-19	15.0001	0.560606	0.205128	0.417391	0.157895	0.151163
Tnfaip8	1.20392	0.557	0.301	1.0757e-15	1.62009e-19	9.33399e-21	1.24435e-20	14.9683	0.704545	0.328205	0.669565	0.390351	0.241279
Csk	0.713029	0.898	0.815	1.09146e-15	8.53782e-24	4.06962e-18	7.51222e-19	14.962	0.931818	0.728205	0.986957	0.828947	0.805233
Ifitm6	1.0286	0.429	0.236	1.12235e-15	5.22315e-25	1.85191e-12	1.10548e-11	14.9499	0.227273	0.538462	0.452174	0.267544	0.215116
Gm16286	0.766694	0.731	0.49	1.13274e-15	6.08433e-16	3.84644e-18	5.06168e-18	14.9459	0.712121	0.682051	0.773913	0.5	0.482558
1810037I17Rik	-0.673819	0.736	0.872	1.22668e-15	5.3888e-18	7.91449e-21	2.37513e-20	14.9113	0.651515	0.902564	0.608696	0.916667	0.843023
Ost4	-0.452034	0.982	0.998	1.30701e-15	1.36409e-21	4.15253e-18	1.94953e-19	14.8837	0.977273	0.989744	0.969565	1	0.997093
9530068E07Rik	1.3645	0.451	0.187	1.40947e-15	3.51784e-16	6.65813e-22	3.05512e-21	14.8509	0.469697	0.297436	0.569565	0.232456	0.156977
Nfkbie	-0.410068	0.765	0.792	1.53389e-15	1.01725e-22	3.62227e-05	8.02228e-07	14.8142	0.818182	0.671795	0.773913	0.850877	0.752907
Tap1	1.1515	0.587	0.318	1.57988e-15	3.48223e-18	4.91195e-22	1.72993e-21	14.8014	0.727273	0.287179	0.76087	0.407895	0.258721
Isoc1	-0.577687	0.853	0.935	1.66194e-15	4.44456e-18	5.18789e-21	1.51218e-20	14.7794	0.80303	0.928205	0.786957	0.951754	0.924419
Pcif1	1.36027	0.422	0.192	1.66704e-15	1.51182e-15	3.68089e-18	2.54464e-18	14.7781	0.469697	0.323077	0.478261	0.184211	0.197674
Iglc3	-0.381053	0.883	0.963	1.91928e-15	8.92487e-58	0.00326382	5.5571e-07	14.7169	0.871212	0.692308	0.991304	0.991228	0.944767
Mdm2	-0.54895	0.858	0.941	1.92797e-15	1.82447e-18	6.07639e-19	1.38264e-18	14.7149	0.780303	0.938462	0.795652	0.929825	0.947674
Ptgs1	0.849728	0.562	0.353	2.16048e-15	8.7436e-19	2.43292e-13	7.70292e-13	14.6655	0.454545	0.548718	0.634783	0.429825	0.302326
Hist1h1d	-0.591245	0.998	1	2.40265e-15	1.2776e-76	6.19967e-17	8.76109e-19	14.6193	0.939394	0.994872	1	1	1
Tmpo	-0.597421	0.941	0.995	2.41448e-15	4.80967e-19	1.57479e-23	6.13362e-25	14.6172	0.840909	0.984615	0.9	1	0.991279
Myl9	1.28392	0.461	0.222	2.49291e-15	1.13788e-23	5.42986e-18	2.07106e-17	14.6033	0.537879	0.302564	0.552174	0.232456	0.215116
Trak2	0.460315	0.743	0.547	2.50215e-15	1.03579e-19	6.51236e-09	4.10499e-11	14.6017	0.606061	0.815385	0.73913	0.552632	0.543605
Snrpd1	-0.676131	0.761	0.895	2.57048e-15	5.32028e-18	8.68196e-23	1.48622e-21	14.59	0.560606	0.933333	0.682609	0.925439	0.875
Slc20a1	0.931774	0.632	0.364	2.57215e-15	8.77905e-18	8.32203e-20	1.91182e-19	14.5897	0.689394	0.605128	0.630435	0.390351	0.34593
Dido1	-0.456083	0.935	0.972	2.63611e-15	9.41721e-18	4.82854e-16	2.85727e-15	14.579	0.931818	0.979487	0.869565	0.973684	0.97093
Tnrc6c	1.57285	0.375	0.147	2.72242e-15	4.53776e-16	3.07729e-19	3.69271e-19	14.565	0.522727	0.220513	0.421739	0.144737	0.148256
Arhgef2	-0.370716	0.953	0.981	3.06309e-15	1.75188e-18	1.4089e-12	6.81853e-13	14.5138	0.909091	0.948718	0.93913	0.991228	0.973837
Laptm4a	-0.378974	0.998	0.998	3.55254e-15	1.61522e-26	2.11223e-14	2.14051e-14	14.4495	0.984848	1	1	0.995614	1
Itgb3	0.735079	0.675	0.49	3.82393e-15	1.94151e-36	2.14117e-10	2.06532e-10	14.4175	0.674242	0.6	0.717391	0.47807	0.497093
H2-DMb1	-0.400656	0.731	0.771	4.01553e-15	2.58336e-18	1.13309e-05	3.75659e-07	14.3963	0.795455	0.594872	0.782609	0.815789	0.741279
Csde1	0.526519	0.968	0.892	4.15926e-15	6.36731e-17	7.64404e-20	1.66933e-19	14.381	0.977273	0.928205	0.986957	0.890351	0.892442
Plpp1	0.91621	0.575	0.35	4.2392e-15	1.51546e-19	3.29223e-15	9.751e-15	14.3727	0.613636	0.471795	0.63913	0.355263	0.34593
Galnt3	1.54735	0.303	0.107	4.44427e-15	3.70315e-17	2.3217e-16	7.37626e-16	14.3522	0.227273	0.225641	0.413043	0.149123	0.0784884
Rab7	0.942506	0.671	0.423	4.49829e-15	4.21872e-17	2.13407e-20	7.13595e-20	14.347	0.742424	0.492308	0.778261	0.460526	0.398256
Plcb2	1.2808	0.463	0.215	4.58368e-15	2.87537e-15	2.13956e-19	4.92076e-19	14.3388	0.537879	0.364103	0.504348	0.254386	0.188953
Prelid1	-0.546214	0.833	0.923	4.87922e-15	2.91394e-19	1.23869e-17	5.86232e-17	14.3116	0.765152	0.882051	0.782609	0.95614	0.901163
Ago1	1.40829	0.418	0.189	8.2441e-15	1.57272e-15	3.25241e-18	2.10023e-18	14.0839	0.545455	0.292308	0.452174	0.188596	0.188953
Plek	1.02354	0.614	0.371	8.46985e-15	4.02588e-19	1.49904e-18	2.34349e-18	14.0721	0.636364	0.466667	0.730435	0.451754	0.31686
Tnfaip8l2	1.37132	0.442	0.217	8.9014e-15	2.57486e-16	9.04432e-18	1.863e-18	14.0505	0.598485	0.220513	0.53913	0.241228	0.200581
Gpnmb	-2.59999	0.142	0.164	9.79762e-15	3.4598e-87	0.118417	2.67751e-09	14.0089	0.0757576	0.0666667	0.243478	0.0833333	0.218023
Dynlt3	1.18997	0.501	0.255	1.00345e-14	2.74084e-16	5.73592e-19	1.58246e-18	13.9985	0.560606	0.323077	0.617391	0.258772	0.252907
Crebbp	1.18117	0.54	0.266	1.03862e-14	2.02578e-16	1.82612e-21	4.7115e-21	13.9835	0.681818	0.374359	0.6	0.289474	0.25
Ap1m1	1.21228	0.501	0.259	1.05574e-14	1.46037e-16	2.94989e-18	3.27857e-18	13.9764	0.666667	0.353846	0.530435	0.289474	0.238372
BC004004	1.09937	0.555	0.306	1.06573e-14	6.32726e-16	5.40047e-19	1.10967e-18	13.9724	0.560606	0.394872	0.686957	0.372807	0.261628
Ccdc6	-0.604814	0.849	0.932	1.09816e-14	1.65389e-18	8.55889e-19	4.31214e-19	13.9593	0.810606	0.969231	0.752174	0.925439	0.936047
Klhl24	1.73155	0.334	0.117	1.16385e-14	4.99167e-15	5.3108e-19	4.18168e-19	13.9341	0.530303	0.14359	0.382609	0.127193	0.110465
Marco	1.5347	0.519	0.274	1.2996e-14	3.73401e-40	1.6497e-20	3.30781e-21	13.8862	0.643939	0.405128	0.543478	0.276316	0.273256
Selenof	-0.437746	0.953	0.995	1.32124e-14	1.65154e-16	9.36503e-20	7.21526e-22	13.879	0.848485	0.989744	0.947826	0.991228	0.997093
Mfng	1.09672	0.603	0.357	1.33169e-14	2.48695e-18	2.26883e-19	2.74165e-19	13.8756	0.939394	0.34359	0.630435	0.429825	0.30814
Ywhag	-0.35048	0.982	0.988	1.3445e-14	1.74687e-17	4.74805e-14	1.41261e-13	13.8714	0.984848	0.979487	0.973913	0.995614	0.982558
Eef1a1	0.391582	1	1	1.38097e-14	1.85265e-82	2.16503e-20	3.18447e-21	13.8598	1	1	1	1	1
Cd4	1.48814	0.429	0.203	1.41494e-14	6.45952e-20	6.74307e-18	2.30643e-18	13.8493	0.560606	0.230769	0.521739	0.254386	0.168605
Ndufa1	-0.404555	0.975	0.981	1.51155e-14	1.3893e-16	6.63074e-18	1.01463e-17	13.8206	0.924242	0.989744	0.973913	0.982456	0.979651
Slc14a1	0.842469	0.515	0.283	1.57343e-14	4.96362e-18	4.91047e-14	1.04595e-14	13.8032	0.44697	0.497436	0.573913	0.302632	0.270349
Fgr	1.04354	0.571	0.325	1.57725e-14	9.30869e-18	9.77478e-19	3.85523e-18	13.8021	0.598485	0.369231	0.726087	0.390351	0.281977
Eif3f	0.576244	0.968	0.955	1.61964e-14	2.69591e-24	7.03146e-20	1.38927e-19	13.7906	0.94697	0.912821	0.995652	0.951754	0.956395
Il4i1	1.39998	0.443	0.215	1.77686e-14	6.71074e-18	7.43476e-18	3.13175e-18	13.7503	0.606061	0.205128	0.552174	0.263158	0.18314
Txlna	-0.574527	0.81	0.879	2.0698e-14	2.99784e-17	1.5917e-15	9.73777e-17	13.6841	0.772727	0.861538	0.743478	0.877193	0.880814
Cul1	0.851145	0.697	0.462	2.14234e-14	1.44677e-15	1.11336e-18	3.05853e-18	13.6691	0.825758	0.584615	0.717391	0.491228	0.44186
Zmym5	1.1274	0.515	0.281	2.29541e-14	2.40372e-15	1.48123e-17	1.57603e-17	13.6391	0.651515	0.364103	0.565217	0.315789	0.258721
Kmo	1.25456	0.485	0.253	2.34978e-14	2.49255e-16	2.50354e-18	1.06937e-18	13.629	0.742424	0.25641	0.530435	0.320175	0.209302
Klf3	1.0684	0.494	0.236	2.36464e-14	5.76624e-16	2.14868e-18	1.37223e-18	13.6262	0.545455	0.451282	0.5	0.254386	0.223837
Chd3	1.29535	0.481	0.245	2.4493e-14	5.59177e-17	1.47333e-18	1.25433e-18	13.611	0.712121	0.235897	0.556522	0.27193	0.226744
Hnrnpl	-0.501689	0.946	0.995	2.59413e-14	1.54227e-19	1.46805e-23	3.46305e-25	13.586	0.916667	0.994872	0.9	1	0.991279
Ythdc1	1.3497	0.434	0.192	2.97754e-14	6.45258e-15	5.26498e-19	1.21639e-18	13.5261	0.537879	0.276923	0.508696	0.276316	0.136628
Arhgef3	0.994057	0.67	0.418	3.24612e-14	1.95552e-18	6.30078e-20	7.79111e-20	13.4886	0.80303	0.466667	0.76087	0.442982	0.401163
Nfe2	0.59234	0.49	0.323	3.30966e-14	3.88124e-18	2.91044e-08	7.96108e-08	13.4802	0.287879	0.712821	0.417391	0.328947	0.319767
Pld4	0.860127	0.777	0.593	3.38419e-14	3.1854e-21	3.36369e-18	1.20309e-18	13.4705	0.893939	0.492308	0.934783	0.609649	0.581395
Fyn	1.11488	0.589	0.33	3.65509e-14	4.18293e-18	1.07477e-19	1.87547e-19	13.4371	0.818182	0.323077	0.682609	0.385965	0.293605
Wdr26	0.644593	0.795	0.638	4.11085e-14	1.08207e-17	1.88367e-14	3.71067e-14	13.3861	0.795455	0.646154	0.9	0.649123	0.630814
Ago2	0.661368	0.743	0.526	4.16596e-14	2.5919e-18	4.76499e-14	2.10963e-14	13.3803	0.719697	0.707692	0.769565	0.491228	0.549419
Ep400	1.12541	0.526	0.281	4.33021e-14	8.37513e-16	3.61236e-18	8.04164e-18	13.3635	0.583333	0.384615	0.613043	0.342105	0.241279
Capg	-0.408733	0.767	0.76	4.4312e-14	9.29841e-22	3.7499e-05	1.88008e-10	13.3535	0.712121	0.74359	0.782609	0.802632	0.732558
Cops7a	-0.527102	0.865	0.932	4.57239e-14	5.94974e-18	8.61352e-16	8.25218e-16	13.3399	0.893939	0.953846	0.76087	0.947368	0.921512
Rnf145	-0.425694	0.899	0.927	4.59521e-14	7.18593e-16	4.10696e-14	3.62793e-15	13.3377	0.840909	0.94359	0.847826	0.942982	0.915698
Fcer1g	0.461708	0.957	0.932	4.67392e-14	2.94933e-30	2.90398e-14	3.10593e-13	13.3303	0.909091	0.907692	0.991304	0.907895	0.947674
Syk	0.790797	0.873	0.767	4.80647e-14	4.5813e-28	5.1902e-16	1.91282e-17	13.3182	0.909091	0.702564	0.952174	0.846491	0.715116
Cd163	1.09922	0.316	0.149	5.35628e-14	5.16707e-16	6.20053e-11	1.51307e-10	13.2711	0.333333	0.364103	0.265217	0.214912	0.104651
Evl	0.800561	0.842	0.755	5.63565e-14	4.19075e-27	2.9905e-15	1.5163e-17	13.2491	0.916667	0.605128	0.956522	0.780702	0.738372
Myadm	1.35321	0.445	0.213	5.88128e-14	2.94334e-17	2.2835e-18	3.6957e-18	13.2305	0.666667	0.205128	0.521739	0.254386	0.186047
Fcho2	1.16185	0.478	0.248	6.19821e-14	3.87599e-15	8.93039e-17	1.56679e-16	13.2077	0.583333	0.328205	0.543478	0.285088	0.223837
Trpv2	-0.440629	0.871	0.932	6.76711e-14	3.18956e-17	2.23364e-12	2.93605e-12	13.1696	0.856061	0.912821	0.795652	0.925439	0.936047
Lrp10	-0.39749	0.957	0.97	6.82624e-14	1.93951e-16	2.33898e-12	1.92351e-12	13.1658	0.909091	0.953846	0.952174	0.982456	0.962209
Oasl2	1.1332	0.503	0.255	6.84661e-14	1.5479e-16	7.04288e-18	1.54933e-17	13.1645	0.598485	0.312821	0.608696	0.320175	0.212209
Gng11	1.04088	0.522	0.301	7.11694e-14	6.16312e-22	1.0225e-14	2.18715e-14	13.1477	0.583333	0.312821	0.665217	0.29386	0.305233
Bloc1s2	-0.465406	0.666	0.706	7.61127e-14	2.02368e-16	2.6257e-06	2.08271e-10	13.1185	0.712121	0.666667	0.617391	0.776316	0.659884
Shoc2	1.43066	0.361	0.143	8.03592e-14	4.69578e-14	1.9604e-17	6.5364e-17	13.095	0.462121	0.271795	0.378261	0.162281	0.130814
Psmd2	-0.518399	0.894	0.976	8.64098e-14	6.4643e-16	1.59945e-17	1.69183e-18	13.0634	0.80303	0.979487	0.847826	0.973684	0.976744
2003-09-01	-1.46021	0.14	0.301	8.70309e-14	2.13074e-16	1.03026e-11	8.49568e-13	13.0603	0.113636	0.210256	0.0956522	0.337719	0.276163
Ctss	-0.18199	0.989	0.998	8.80174e-14	7.6622e-37	0.588738	0.0998783	13.0554	0.954545	0.969231	1	0.995614	1
Polr2j	-0.569745	0.883	0.958	8.96866e-14	6.54859e-16	3.32397e-23	3.67791e-22	13.0473	0.818182	0.964103	0.813043	0.964912	0.953488
Rexo4	-0.611081	0.668	0.745	9.09764e-14	9.67603e-17	2.62619e-11	1.27417e-15	13.0411	0.727273	0.723077	0.578261	0.754386	0.738372
Smarce1	-0.55663	0.788	0.895	1.04905e-13	1.56274e-15	3.01508e-16	6.01491e-16	12.9792	0.734848	0.866667	0.708696	0.903509	0.889535
Inf2	1.16666	0.454	0.236	1.08068e-13	1.07643e-15	9.48896e-16	1.8871e-15	12.9663	0.492424	0.333333	0.534783	0.25	0.226744
Slc8b1	-0.633577	0.569	0.664	1.15109e-13	6.1382e-17	3.5802e-09	1.87349e-12	12.9389	0.492424	0.574359	0.6	0.72807	0.622093
Eif2b2	-0.673517	0.695	0.813	1.19099e-13	7.89556e-16	1.84902e-17	1.0244e-18	12.9241	0.583333	0.830769	0.613043	0.77193	0.840116
Cadm1	-0.679943	0.594	0.691	1.27891e-13	7.44781e-18	8.3284e-11	6.59178e-15	12.8932	0.515152	0.584615	0.634783	0.684211	0.694767
Tlk1	0.653997	0.756	0.51	1.34216e-13	3.04257e-14	1.94964e-16	2.26028e-17	12.8722	0.742424	0.712821	0.786957	0.513158	0.508721
Polr2g	-0.3398	0.919	0.946	1.35241e-13	6.07316e-16	7.82246e-08	1.68561e-07	12.8689	0.901515	0.917949	0.908696	0.951754	0.94186
Ppp4c	0.658985	0.846	0.678	1.43028e-13	3.2455e-15	1.43694e-16	8.46995e-17	12.8446	0.840909	0.764103	0.9	0.723684	0.648256
Trir	-0.520908	0.916	0.986	1.44625e-13	2.50409e-16	7.33329e-22	2.58517e-22	12.8398	0.818182	0.969231	0.886957	0.982456	0.988372
Sp100	0.935536	0.662	0.453	1.57287e-13	6.27772e-17	5.56365e-17	2.05308e-17	12.8033	0.818182	0.425641	0.76087	0.548246	0.389535
Ccdc88c	0.768765	0.752	0.549	1.58169e-13	1.73946e-17	1.12464e-15	5.80536e-16	12.8009	0.833333	0.641026	0.782609	0.548246	0.549419
Tmod3	0.950141	0.668	0.442	1.6065e-13	2.15832e-18	1.83968e-17	1.17063e-17	12.7941	0.863636	0.466667	0.717391	0.407895	0.465116
Mpo	0.814251	0.461	0.334	1.64887e-13	1.85546e-42	7.56371e-06	1.28271e-05	12.7828	0.159091	0.589744	0.526087	0.311404	0.348837
Ik	-0.38549	0.878	0.953	1.67849e-13	1.92785e-14	8.27078e-11	2.58275e-11	12.7751	0.848485	0.887179	0.856522	0.969298	0.94186
Arhgef1	0.725369	0.86	0.705	1.68368e-13	1.44414e-18	2.72977e-18	2.57447e-18	12.7737	0.931818	0.712821	0.926087	0.785088	0.651163
Eif2s3x	1.19382	0.429	0.205	1.85863e-13	3.20346e-14	1.68679e-16	7.09075e-16	12.7308	0.424242	0.389744	0.465217	0.258772	0.168605
Spp1	-2.72305	0.117	0.157	1.91859e-13	4.94884e-68	0.0165828	2.48091e-08	12.717	0.0681818	0.153846	0.113043	0.109649	0.188953
Bcl11a	1.14598	0.506	0.262	1.96115e-13	7.04019e-16	3.99267e-18	1.18284e-17	12.7075	0.590909	0.328205	0.608696	0.280702	0.25
Gp5	0.872328	0.408	0.243	2.13287e-13	5.9987e-24	8.87679e-09	2.12127e-08	12.671	0.265152	0.446154	0.456522	0.267544	0.226744
Ndufs8	0.654783	0.847	0.692	2.20841e-13	2.97414e-15	2.18589e-16	1.66473e-16	12.6559	0.878788	0.723077	0.917391	0.75	0.65407
Ccar1	-0.544545	0.847	0.909	2.24947e-13	9.36094e-16	2.0536e-15	4.95265e-16	12.6479	0.75	0.953846	0.76087	0.912281	0.906977
Hpgd	1.34844	0.345	0.149	2.30811e-13	6.89358e-14	6.48086e-15	1.87922e-14	12.6367	0.431818	0.235897	0.386957	0.166667	0.136628
Arpc2	0.828074	0.758	0.535	2.3399e-13	6.69173e-17	1.18887e-19	3.73589e-19	12.6308	0.871212	0.523077	0.882609	0.561404	0.517442
Snrpe	-0.334128	0.989	1	2.40969e-13	6.83879e-17	3.72757e-16	1.44883e-17	12.618	0.939394	0.989744	0.986957	1	1
Dennd4a	1.05615	0.417	0.227	2.41969e-13	5.42757e-15	1.32034e-12	3.88576e-12	12.6162	0.424242	0.389744	0.434783	0.254386	0.209302
Csrp1	0.590232	0.86	0.719	2.97324e-13	7.66436e-18	1.90493e-13	1.61535e-13	12.5268	0.856061	0.805128	0.882609	0.710526	0.723837
Psmb8	-0.148233	0.961	0.976	3.00092e-13	8.97218e-25	0.316338	0.253424	12.5227	0.962121	0.902564	0.991304	0.964912	0.982558
Smc6	1.35321	0.404	0.18	3.01235e-13	1.11211e-13	1.35968e-17	3.12492e-17	12.5211	0.492424	0.271795	0.465217	0.210526	0.159884
Ifi205	-0.851561	0.373	0.423	3.03375e-13	8.82985e-22	0.000521671	1.94569e-13	12.518	0.409091	0.353846	0.369565	0.495614	0.375
Spcs3	-0.453464	0.882	0.937	3.07647e-13	1.39425e-15	1.51298e-13	4.99234e-13	12.5119	0.780303	0.907692	0.869565	0.947368	0.930233
Armc1	-0.55958	0.898	0.969	3.10118e-13	2.90817e-15	8.82605e-22	9.52443e-22	12.5085	0.833333	0.969231	0.834783	0.934211	0.991279
S1pr1	1.12491	0.614	0.418	3.31444e-13	9.57919e-26	1.76245e-16	1.81518e-18	12.4796	0.825758	0.333333	0.726087	0.442982	0.401163
Gimap8	0.929026	0.722	0.582	3.34803e-13	1.53456e-24	1.18733e-14	1.47014e-17	12.4752	0.863636	0.446154	0.843478	0.627193	0.552326
Lcp2	0.600535	0.885	0.759	3.39682e-13	2.52455e-16	1.80101e-16	3.0272e-16	12.4689	0.856061	0.753846	0.969565	0.754386	0.761628
Ndufs2	0.921185	0.643	0.402	3.55143e-13	6.656e-15	4.73831e-18	1.25108e-17	12.4496	0.734848	0.497436	0.713043	0.447368	0.372093
Rubcnl	1.43814	0.388	0.164	3.63309e-13	2.26227e-14	7.73874e-18	1.6776e-17	12.4397	0.477273	0.210256	0.486957	0.210526	0.133721
Nr1h2	0.81993	0.716	0.463	3.63603e-13	4.47641e-15	1.36415e-18	9.18873e-19	12.4394	0.840909	0.564103	0.765217	0.464912	0.462209
Cdk1	-0.508381	0.917	0.993	3.67423e-13	2.02541e-10	1.36937e-20	6.84508e-24	12.4348	0.712121	0.979487	0.93913	0.986842	0.997093
Vwf	1.12373	0.381	0.222	3.79026e-13	1.03511e-23	1.04753e-09	1.77686e-09	12.4213	0.348485	0.353846	0.421739	0.22807	0.218023
Ubr3	-0.473061	0.887	0.937	3.79375e-13	1.36173e-16	2.80169e-14	3.10821e-14	12.4209	0.931818	0.938462	0.813043	0.925439	0.944767
Dock2	0.765248	0.844	0.734	4.22911e-13	3.71738e-23	1.13715e-15	1.60947e-16	12.3738	0.886364	0.615385	0.956522	0.79386	0.694767
Cltb	-0.53236	0.779	0.839	4.3317e-13	4.5293e-15	1.07201e-12	7.15449e-15	12.3633	0.712121	0.835897	0.747826	0.824561	0.848837
Taf15	1.04497	0.526	0.294	4.33405e-13	4.00999e-13	2.59884e-17	8.69256e-17	12.3631	0.598485	0.369231	0.617391	0.364035	0.247093
Notch4	-1.0081	0.307	0.449	4.42154e-13	1.67952e-16	7.34211e-10	2.94888e-14	12.3544	0.280303	0.420513	0.226087	0.5	0.415698
Ranbp2	1.09479	0.501	0.276	4.57729e-13	7.06986e-15	2.16454e-16	4.81992e-16	12.3394	0.613636	0.364103	0.552174	0.342105	0.232558
Reep5	0.417977	0.943	0.874	4.72373e-13	8.71015e-14	1.96096e-13	2.36904e-12	12.3257	0.939394	0.902564	0.969565	0.907895	0.851744
Treml2	1.16785	0.456	0.245	4.81561e-13	1.8485e-15	3.25047e-15	3.29341e-15	12.3173	0.613636	0.333333	0.469565	0.254386	0.238372
Itga2b	0.64083	0.474	0.341	4.82272e-13	1.3383e-23	2.73627e-06	1.18388e-05	12.3167	0.295455	0.553846	0.508696	0.355263	0.331395
Hmbox1	1.6814	0.307	0.112	4.82883e-13	7.46871e-14	1.56451e-16	1.18799e-16	12.3162	0.378788	0.133333	0.413043	0.166667	0.0755814
Samhd1	0.849047	0.754	0.533	4.83307e-13	1.22947e-18	1.99089e-19	7.05768e-19	12.3158	0.878788	0.476923	0.895652	0.618421	0.476744
Fbxl5	-0.397806	0.899	0.927	5.1382e-13	1.30196e-16	2.24184e-10	9.48239e-11	12.2892	0.893939	0.923077	0.83913	0.95614	0.906977
Hars	1.06514	0.445	0.22	5.20868e-13	1.80534e-13	4.36452e-16	3.93975e-15	12.2833	0.409091	0.405128	0.5	0.27193	0.186047
Cs	-0.371563	0.98	0.998	5.31061e-13	1.07642e-18	1.8587e-15	6.87823e-14	12.2749	0.984848	0.989744	0.96087	1	0.997093
Rnf13	1.36898	0.417	0.175	5.46775e-13	4.02835e-14	6.80199e-19	1.41775e-18	12.2622	0.545455	0.235897	0.495652	0.214912	0.148256
Ndfip1	-0.276586	0.982	0.984	5.67563e-13	1.95859e-15	4.20988e-08	8.75943e-07	12.246	0.962121	0.974359	0.982609	0.97807	0.988372
Slc25a39	0.730604	0.585	0.378	5.79617e-13	8.69515e-17	7.06305e-12	1.10634e-11	12.2369	0.416667	0.605128	0.669565	0.394737	0.366279
H3f3b	0.23857	0.998	1	6.11805e-13	8.10927e-22	1.2086e-08	7.10186e-08	12.2134	0.969697	1	1	1	1
Gja1	0.884687	0.528	0.323	6.29072e-13	2.53837e-18	1.00895e-12	3.53613e-12	12.2013	0.537879	0.512821	0.534783	0.346491	0.30814
Rnf44	1.37564	0.391	0.161	6.30781e-13	1.61607e-13	2.75768e-18	1.06356e-17	12.2001	0.454545	0.215385	0.504348	0.175439	0.151163
Lcp1	-0.20885	0.991	0.998	6.55529e-13	5.49554e-25	0.000191909	0.00170234	12.1834	0.916667	0.984615	0.991304	1	0.997093
Gp9	0.864456	0.408	0.271	6.57062e-13	7.82256e-20	2.53753e-07	3.92193e-07	12.1824	0.280303	0.420513	0.469565	0.254386	0.281977
Rufy3	-0.539051	0.628	0.689	7.09348e-13	1.19571e-15	1.13115e-07	8.16626e-12	12.1491	0.583333	0.625641	0.647826	0.640351	0.72093
Vcl	0.654883	0.677	0.491	7.31097e-13	2.58258e-18	1.85822e-10	2.09845e-10	12.136	0.598485	0.682051	0.708696	0.47807	0.5
Cela1	2.89492	0.199	0.152	7.36156e-13	8.26138e-68	0.0410404	0.0753074	12.133	0.128788	0.297436	0.156522	0.162281	0.145349
Cd302	1.05816	0.508	0.288	7.50576e-13	1.60622e-18	1.757e-15	5.43995e-15	12.1246	0.575758	0.379487	0.578261	0.315789	0.270349
Cops2	1.04951	0.488	0.262	7.52122e-13	1.85778e-13	4.41631e-16	2.11805e-15	12.1237	0.44697	0.441026	0.552174	0.315789	0.226744
Cyfip2	-0.264809	0.978	0.988	7.59438e-13	2.02489e-18	1.2394e-06	6.16483e-07	12.1195	0.893939	0.989744	0.969565	0.995614	0.982558
Rhag	0.11614	0.684	0.65	7.77879e-13	1.9565e-17	0.444078	0.473333	12.1091	0.416667	0.887179	0.634783	0.535088	0.726744
Smim14	0.903888	0.688	0.451	7.93113e-13	2.70117e-16	2.90834e-18	5.70668e-18	12.1007	0.810606	0.492308	0.773913	0.486842	0.427326
Dad1	-0.414719	0.937	0.979	8.95211e-13	8.68453e-15	1.90038e-13	5.91715e-13	12.0481	0.94697	0.953846	0.9	0.973684	0.982558
Ikzf3	0.852642	0.776	0.649	9.05583e-13	1.99266e-25	7.21776e-17	3.68249e-19	12.0431	0.878788	0.487179	0.921739	0.684211	0.625
Ndufb7	-0.36844	0.996	0.998	9.39531e-13	1.67397e-16	3.99107e-22	1.11224e-22	12.0271	0.984848	0.994872	0.995652	1	0.997093
Mplkip	0.995609	0.555	0.325	9.9011e-13	8.68199e-14	7.51696e-17	2.65812e-16	12.0043	0.666667	0.415385	0.608696	0.429825	0.255814
Map11	1.28172	0.375	0.164	9.95262e-13	6.82302e-14	7.97439e-16	3.5827e-15	12.0021	0.318182	0.282051	0.486957	0.149123	0.174419
Dennd6a	0.742629	0.745	0.503	9.95609e-13	1.51137e-15	5.94087e-16	3.40902e-17	12.0019	0.840909	0.584615	0.817391	0.407895	0.56686
Fkbp4	-0.469638	0.95	0.995	1.04106e-12	1.29243e-16	3.37223e-19	1.67222e-19	11.9825	0.954545	0.974359	0.913043	1	0.991279
Cln8	-0.635176	0.826	0.907	1.07429e-12	6.62142e-15	4.96684e-18	1.89265e-18	11.9689	0.636364	0.94359	0.795652	0.864035	0.936047
Samd14	0.359231	0.569	0.491	1.25678e-12	2.36254e-17	0.00256442	0.00649475	11.9007	0.378788	0.805128	0.469565	0.429825	0.531977
Ralgapa1	0.972404	0.594	0.334	1.34377e-12	2.87588e-14	6.35998e-19	1.77537e-18	11.8717	0.742424	0.420513	0.656522	0.403509	0.287791
Slc35c2	-0.522045	0.747	0.804	1.35521e-12	1.89423e-15	1.55543e-10	2.48413e-13	11.868	0.704545	0.784615	0.717391	0.828947	0.787791
Fam49a	1.20453	0.442	0.227	1.41335e-12	7.31632e-15	1.18013e-15	1.78487e-15	11.8498	0.590909	0.241026	0.526087	0.263158	0.203488
Add1	0.423141	0.828	0.708	1.48995e-12	4.16355e-15	1.82195e-09	1.1022e-08	11.8268	0.818182	0.835897	0.8	0.662281	0.738372
Pias1	1.2773	0.406	0.199	1.52813e-12	4.28014e-13	2.35979e-15	1.33215e-15	11.8158	0.530303	0.271795	0.447826	0.232456	0.177326
Abcf3	-0.596451	0.662	0.769	1.54909e-12	5.35272e-15	6.95683e-12	3.67071e-13	11.8099	0.727273	0.702564	0.578261	0.776316	0.764535
Tmem163	1.30533	0.449	0.229	1.55696e-12	5.92749e-17	1.43417e-16	8.24014e-17	11.8077	0.659091	0.2	0.53913	0.22807	0.229651
Thbs1	0.564278	0.754	0.687	1.6397e-12	2.39203e-52	0.00290908	0.00214453	11.7852	0.628788	0.758974	0.8	0.561404	0.770349
Tmem71	1.32347	0.418	0.178	1.79098e-12	5.66421e-14	8.7614e-19	3.28573e-18	11.7469	0.568182	0.282051	0.447826	0.201754	0.162791
Acaca	1.66305	0.395	0.248	1.80413e-12	6.78736e-30	3.46849e-08	3.60523e-09	11.7437	0.613636	0.34359	0.313043	0.315789	0.203488
Cbx1	-0.564149	0.706	0.844	1.81578e-12	1.3514e-14	6.23864e-15	3.44419e-14	11.7409	0.681818	0.769231	0.647826	0.890351	0.813953
Wwp1	1.25174	0.413	0.194	1.83703e-12	1.16322e-13	1.43966e-16	6.46988e-16	11.7359	0.55303	0.241026	0.478261	0.236842	0.165698
Polr2m	0.733724	0.727	0.538	1.91572e-12	3.69842e-14	1.73276e-14	1.43824e-14	11.7177	0.734848	0.687179	0.734783	0.565789	0.520349
Tmem134	-0.453849	0.943	0.972	1.95569e-12	1.2092e-14	6.85232e-19	1.36762e-18	11.7087	0.863636	0.979487	0.930435	0.969298	0.973837
Srsf11	-0.246715	0.998	0.997	1.96657e-12	8.72357e-16	5.43968e-09	3.74004e-09	11.7063	0.984848	0.994872	1	1	0.994186
Lims1	0.950111	0.576	0.329	2.02093e-12	3.56002e-16	2.7239e-17	9.89722e-17	11.6944	0.613636	0.466667	0.647826	0.355263	0.311047
Sec11a	-0.424742	0.736	0.813	2.09854e-12	2.10746e-13	4.78303e-09	5.49054e-09	11.6781	0.795455	0.687179	0.717391	0.864035	0.77907
Hist1h2bc	0.642814	0.706	0.542	2.27516e-12	1.51715e-17	3.79807e-11	1.06479e-10	11.643	0.681818	0.707692	0.721739	0.486842	0.578488
Trf	0.962656	0.768	0.65	2.29882e-12	1.21607e-46	2.31454e-07	4.58796e-08	11.6385	0.80303	0.717949	0.795652	0.596491	0.686047
Fasn	1.84853	0.54	0.453	2.3636e-12	1.5524e-88	0.0140251	0.000876492	11.6264	0.537879	0.553846	0.530435	0.429825	0.468023
Ddx39	-0.465009	0.944	0.99	2.4658e-12	1.31258e-15	2.62897e-18	5.58022e-19	11.608	0.833333	0.989744	0.908696	0.995614	0.985465
Ifngr2	1.20638	0.463	0.226	2.47882e-12	8.84602e-13	6.27766e-18	2.58838e-17	11.6058	0.674242	0.241026	0.530435	0.263158	0.200581
Fkbp3	-0.460846	0.829	0.872	2.60282e-12	6.30317e-14	5.91352e-12	1.39784e-13	11.5846	0.757576	0.902564	0.778261	0.864035	0.877907
Asf1a	1.33929	0.338	0.15	2.81468e-12	7.48339e-13	7.48214e-14	1.29248e-13	11.5506	0.325758	0.292308	0.382609	0.223684	0.101744
Slc12a6	1.13083	0.497	0.269	3.07617e-12	9.01639e-14	1.10619e-16	1.93661e-16	11.512	0.674242	0.220513	0.630435	0.328947	0.229651
Mark3	0.857335	0.625	0.374	3.08007e-12	6.40329e-14	2.59617e-17	5.63946e-17	11.5114	0.704545	0.507692	0.678261	0.438596	0.331395
Nt5c2	-0.560114	0.81	0.932	3.10327e-12	1.40138e-13	1.48179e-20	7.73068e-20	11.5082	0.704545	0.94359	0.730435	0.916667	0.94186
Psma4	-0.506083	0.756	0.841	3.16245e-12	5.91963e-14	5.26495e-12	2.76321e-12	11.5	0.674242	0.830769	0.713043	0.890351	0.80814
Tle5	0.456426	0.978	0.96	3.30701e-12	1.51903e-14	3.30851e-16	5.6767e-15	11.4806	0.977273	0.94359	1	0.951754	0.965116
Asns	-0.968787	0.668	0.76	3.35599e-12	4.65119e-26	1.16269e-14	1.30914e-19	11.4742	0.348485	0.887179	0.621739	0.627193	0.848837
Sort1	1.42134	0.275	0.107	3.37857e-12	1.49688e-13	5.17862e-13	2.26982e-12	11.4713	0.295455	0.266667	0.269565	0.105263	0.107558
Stx2	0.612007	0.539	0.362	3.49856e-12	2.34094e-15	2.49353e-09	1.28174e-08	11.4561	0.431818	0.635897	0.517391	0.342105	0.375
Pianp	-1.19129	0.205	0.392	3.59658e-12	1.63858e-14	1.24276e-12	1.13501e-12	11.4441	0.166667	0.317949	0.130435	0.377193	0.401163
Psmb7	-0.460956	0.944	0.983	3.81038e-12	6.51089e-14	1.05233e-19	3.77279e-19	11.419	0.893939	0.984615	0.895652	0.982456	0.982558
Supt4a	0.754035	0.734	0.476	3.84694e-12	3.28972e-15	7.49202e-18	7.93514e-19	11.4149	0.757576	0.615385	0.808696	0.473684	0.476744
Fxyd5	0.781635	0.799	0.628	3.87663e-12	6.09963e-19	1.55166e-15	5.78018e-16	11.4115	0.840909	0.584615	0.943478	0.640351	0.619186
Senp6	1.24809	0.42	0.187	3.89192e-12	3.87684e-12	8.25689e-18	4.02036e-17	11.4098	0.492424	0.276923	0.5	0.258772	0.139535
Arf3	-0.307317	0.847	0.881	4.10661e-12	2.53018e-14	1.27863e-05	2.243e-05	11.3865	0.916667	0.805128	0.830435	0.934211	0.84593
Alms1	-0.913834	0.438	0.633	4.17377e-12	1.81899e-14	4.13585e-16	2.26452e-16	11.3795	0.265152	0.671795	0.33913	0.592105	0.659884
Elf1	1.33725	0.388	0.191	4.4234e-12	3.13695e-14	9.87735e-15	2.99334e-15	11.3542	0.5	0.215385	0.469565	0.263158	0.142442
Cox8a	-0.375638	0.971	0.997	4.46974e-12	4.28654e-15	4.75721e-18	3.41707e-18	11.3497	0.94697	0.984615	0.978261	0.991228	1
Ccnd3	0.564333	0.727	0.514	4.7321e-12	1.11575e-14	7.03458e-13	5.00738e-13	11.3249	0.75	0.738462	0.7	0.526316	0.505814
Cybb	0.451899	0.969	0.914	4.9174e-12	1.61265e-17	2.41429e-14	1.86972e-13	11.3083	0.863636	0.964103	0.986957	0.960526	0.883721
Fgd2	-0.526576	0.607	0.696	5.05277e-12	7.29791e-16	5.19571e-09	1.76996e-10	11.2965	0.643939	0.553846	0.608696	0.714912	0.68314
Atic	-0.567763	0.785	0.895	5.36002e-12	6.38938e-15	4.34311e-17	3.38307e-16	11.2708	0.621212	0.912821	0.713043	0.921053	0.877907
Rb1	0.777686	0.618	0.379	5.57415e-12	2.01429e-15	6.24188e-15	5.39478e-15	11.2538	0.681818	0.553846	0.634783	0.416667	0.354651
Dap	1.17422	0.456	0.217	5.65118e-12	1.28231e-12	3.34189e-17	6.25013e-17	11.2479	0.55303	0.241026	0.582609	0.27193	0.180233
Sp4	0.923938	0.522	0.29	5.68052e-12	2.03331e-12	8.13118e-16	5.71871e-15	11.2456	0.55303	0.512821	0.513043	0.320175	0.270349
Ppp1r8	-0.551737	0.813	0.906	5.72172e-12	1.42673e-13	3.8718e-16	6.24931e-16	11.2425	0.69697	0.912821	0.73913	0.916667	0.898256
Hmgb3	-0.714938	0.813	0.899	5.80577e-12	8.22293e-17	1.87512e-17	1.37663e-17	11.2361	0.560606	0.953846	0.778261	0.864035	0.921512
Casp4	1.49777	0.323	0.143	5.80675e-12	3.65072e-13	7.38936e-14	1.11971e-14	11.2361	0.287879	0.14359	0.495652	0.179825	0.119186
Itgb2	-0.348914	0.98	0.981	6.06593e-12	8.0403e-17	2.16339e-09	3.06472e-10	11.2171	0.916667	0.969231	0.982609	0.97807	0.982558
Clic5	0.982243	0.472	0.271	6.27386e-12	6.84502e-17	4.63085e-13	2.29329e-12	11.2025	0.659091	0.333333	0.482609	0.263158	0.276163
Atp6v1f	-0.327146	0.914	0.942	6.66723e-12	1.73301e-14	6.18898e-08	1.8796e-07	11.1761	0.924242	0.882051	0.9	0.960526	0.930233
Esd	-0.435158	0.934	0.974	6.89159e-12	4.88164e-15	5.71993e-15	9.97744e-15	11.1617	0.893939	0.969231	0.908696	0.991228	0.962209
Stk10	-0.357543	0.837	0.846	7.23237e-12	8.28477e-18	5.2534e-06	5.93797e-08	11.1407	0.871212	0.789744	0.8	0.881579	0.822674
Tspan7	1.53366	0.303	0.114	7.36053e-12	2.83216e-14	2.21503e-15	8.0319e-15	11.1331	0.378788	0.189744	0.356522	0.131579	0.101744
Rbms1	1.14233	0.49	0.231	7.54392e-12	1.46035e-13	2.44627e-19	5.0081e-19	11.1224	0.583333	0.333333	0.569565	0.285088	0.194767
Sp3	1.02284	0.515	0.287	7.9828e-12	1.00513e-13	3.17852e-16	1.51007e-15	11.0978	0.606061	0.364103	0.591304	0.364035	0.235465
Gripap1	0.927307	0.564	0.322	8.01163e-12	2.55161e-13	7.3826e-17	4.00848e-16	11.0963	0.712121	0.476923	0.552174	0.368421	0.290698
Usp9x	0.80029	0.637	0.378	9.29319e-12	1.33594e-12	6.2368e-17	1.52032e-17	11.0318	0.636364	0.589744	0.686957	0.390351	0.369186
Hist1h3c	-0.415306	0.987	1	9.31924e-12	1.63826e-08	8.66808e-16	2.4499e-18	11.0306	0.863636	0.989744	1	1	1
1810058I24Rik	0.779702	0.526	0.316	9.38359e-12	3.2489e-13	9.72303e-13	5.0452e-12	11.0276	0.469697	0.466667	0.608696	0.333333	0.305233
Wfdc21	0.516247	0.666	0.579	9.54025e-12	7.79968e-42	0.00423946	0.00290071	11.0204	0.325758	0.794872	0.721739	0.574561	0.581395
Snrpg	-0.412503	0.953	0.993	9.55172e-12	3.43745e-14	1.74408e-16	5.48442e-17	11.0199	0.863636	0.984615	0.930435	0.991228	0.994186
Nsa2	1.11719	0.454	0.243	9.84825e-12	5.19241e-13	8.76484e-15	1.66731e-14	11.0066	0.55303	0.282051	0.543478	0.307018	0.200581
Flna	0.420671	0.959	0.953	9.89038e-12	2.99151e-19	1.58623e-12	7.07237e-14	11.0048	0.94697	0.938462	0.96087	0.95614	0.950581
Pts	1.38828	0.345	0.15	1.00385e-11	9.61593e-13	1.09009e-14	1.94085e-14	10.9983	0.401515	0.241026	0.4	0.201754	0.116279
Idh3b	1.22668	0.422	0.201	1.01954e-11	3.37364e-13	2.4431e-16	1.04249e-15	10.9916	0.55303	0.251282	0.491304	0.223684	0.186047
Sh3bgrl3	0.541012	0.961	0.953	1.1392e-11	7.20441e-20	9.0076e-17	2.07625e-17	10.9434	0.977273	0.892308	0.995652	0.95614	0.950581
Vps54	1.03135	0.496	0.271	1.1541e-11	2.60204e-12	2.04166e-15	6.10482e-15	10.9378	0.590909	0.317949	0.591304	0.359649	0.212209
Arhgef18	0.93756	0.632	0.414	1.1822e-11	2.72405e-17	1.0902e-15	9.20598e-16	10.9273	0.825758	0.476923	0.647826	0.464912	0.380814
Atp6v1e1	-0.469798	0.934	0.981	1.22105e-11	2.3034e-14	8.27584e-17	1.25187e-16	10.9133	0.893939	0.979487	0.895652	0.960526	0.994186
Arhgap6	1.61453	0.248	0.087	1.25059e-11	6.55634e-12	2.47824e-13	4.77649e-13	10.9029	0.257576	0.189744	0.291304	0.114035	0.0697674
Pold4	-0.353766	0.727	0.75	1.3347e-11	3.65832e-18	0.00231071	0.000126807	10.8746	0.772727	0.610256	0.765217	0.75	0.75
Ckb	-0.772901	0.413	0.526	1.40328e-11	2.29043e-15	1.39081e-07	7.4869e-11	10.8529	0.409091	0.45641	0.378261	0.526316	0.526163
Aftph	1.01466	0.499	0.283	1.43002e-11	4.10862e-12	6.99814e-15	1.60757e-14	10.8447	0.606061	0.430769	0.495652	0.350877	0.238372
Ms4a4b	1.18994	0.56	0.299	1.53622e-11	5.48435e-22	8.93209e-19	9.21775e-19	10.8135	0.795455	0.292308	0.652174	0.328947	0.27907
Capzb	0.557481	0.93	0.846	1.6223e-11	2.05625e-14	3.88774e-18	2.79711e-17	10.7899	0.954545	0.825641	0.986957	0.846491	0.84593
Tpcn1	0.876281	0.399	0.213	1.65794e-11	2.90063e-12	3.88034e-11	8.68542e-11	10.7804	0.363636	0.466667	0.36087	0.171053	0.241279
Sell	0.780572	0.826	0.729	1.66795e-11	5.07604e-22	1.66547e-11	5.77173e-14	10.7778	0.893939	0.687179	0.865217	0.785088	0.69186
Adgre4	0.97812	0.397	0.229	1.74484e-11	1.64409e-12	1.33534e-10	2.10287e-10	10.7582	0.348485	0.353846	0.46087	0.241228	0.22093
Cul3	0.705657	0.732	0.524	1.80504e-11	4.42007e-12	4.04084e-15	6.60503e-15	10.7435	0.75	0.651282	0.773913	0.557018	0.502907
Ociad1	-0.438658	0.905	0.967	1.81985e-11	1.73654e-12	4.00112e-15	1.13423e-14	10.74	0.871212	0.948718	0.847826	0.964912	0.968023
Psmb4	-0.28619	0.995	1	1.86035e-11	2.37161e-14	8.49499e-14	5.8424e-12	10.7304	0.969697	0.994872	0.995652	1	1
Pfn1	-0.144782	1	1	1.93385e-11	2.37962e-42	1.76589e-07	1.30107e-07	10.7136	1	1	1	1	1
Hnrnpd	0.308318	0.989	0.983	1.94846e-11	2.00832e-16	5.48638e-12	1.53798e-11	10.7103	0.954545	0.984615	0.991304	0.986842	0.979651
Tagln2	0.413341	0.984	0.974	2.03377e-11	1.54791e-14	1.12965e-15	4.26588e-15	10.6917	0.977273	0.953846	1	0.986842	0.965116
Tal1	0.455635	0.44	0.35	2.04815e-11	6.16118e-14	0.000833909	0.0025263	10.6886	0.234848	0.605128	0.417391	0.342105	0.354651
Pitpnc1	1.3333	0.357	0.154	2.06563e-11	4.17258e-12	1.61945e-15	6.96118e-15	10.6849	0.44697	0.220513	0.421739	0.157895	0.151163
Sash3	0.873	0.666	0.444	2.09445e-11	1.44092e-13	2.55987e-16	4.70449e-16	10.6789	0.795455	0.487179	0.730435	0.535088	0.383721
Tinagl1	0.35458	0.67	0.542	2.10419e-11	9.28407e-15	4.37742e-05	5.38206e-05	10.6769	0.598485	0.774359	0.613043	0.504386	0.56686
C6	1.44169	0.235	0.091	2.14934e-11	9.5886e-13	4.75931e-11	1.88227e-10	10.6677	0.265152	0.158974	0.282609	0.0877193	0.0930233
Igfbp4	0.88022	0.734	0.43	2.23914e-11	4.42546e-21	3.63519e-25	2.48682e-25	10.6499	0.909091	0.564103	0.778261	0.434211	0.427326
Ighg2c	1.50347	0.503	0.528	2.26876e-11	3.10801e-157	0.00434288	4.18e-23	10.6442	0.181818	0.138462	0.973913	0.421053	0.598837
H2-Q7	0.715822	0.838	0.726	2.26931e-11	2.6365e-19	1.86401e-16	1.5718e-16	10.6441	0.939394	0.564103	0.978261	0.785088	0.686047
Ptprm	1.31467	0.307	0.138	2.27446e-11	3.80539e-12	2.38477e-12	4.48845e-12	10.6431	0.371212	0.2	0.36087	0.157895	0.125
Nsd1	-0.538512	0.576	0.678	2.27853e-11	8.33726e-14	1.10882e-07	1.48905e-08	10.6423	0.598485	0.553846	0.573913	0.697368	0.665698
Cyth1	1.08051	0.519	0.269	2.30581e-11	1.08734e-12	1.7408e-18	1.19617e-17	10.6372	0.719697	0.333333	0.56087	0.333333	0.226744
Pan3	1.25907	0.386	0.178	2.34619e-11	1.04944e-11	1.19094e-15	5.10231e-15	10.6296	0.431818	0.25641	0.469565	0.219298	0.151163
Cbfa2t3	-0.415484	0.851	0.897	2.42232e-11	4.59377e-13	1.39229e-10	6.64931e-11	10.6158	0.810606	0.851282	0.826087	0.885965	0.90407
Npnt	1.6788	0.233	0.08	2.44965e-11	4.06865e-12	9.56923e-13	1.83492e-12	10.6109	0.333333	0.112821	0.278261	0.105263	0.0639535
Pabpc1	-0.292002	1	1	2.5043e-11	2.99259e-21	7.74993e-17	2.06967e-14	10.6013	0.992424	1	1	1	1
Daam1	0.560804	0.591	0.407	2.50464e-11	4.6974e-14	2.77545e-09	4.71714e-09	10.6013	0.575758	0.641026	0.556522	0.399123	0.412791
Hnrnpk	0.437891	0.937	0.843	2.50761e-11	3.74219e-13	8.96376e-14	3.38727e-13	10.6007	0.916667	0.923077	0.943478	0.894737	0.80814
Hnrnpdl	0.520448	0.935	0.792	2.50993e-11	6.32034e-13	1.2034e-16	7.12262e-18	10.6003	0.901515	0.928205	0.926087	0.846491	0.755814
Csf1r	0.66022	0.81	0.614	2.89736e-11	1.77818e-15	3.50591e-16	8.28132e-16	10.538	0.787879	0.687179	0.895652	0.596491	0.625
Gfer	-0.582585	0.7	0.813	2.98628e-11	9.46088e-13	1.43733e-13	5.75634e-14	10.5249	0.606061	0.85641	0.604348	0.815789	0.811047
Txndc5	0.619538	0.932	0.906	3.23103e-11	1.68966e-29	2.44562e-12	3.09776e-13	10.4907	0.924242	0.825641	0.995652	0.903509	0.906977
C1qb	0.979829	0.583	0.318	3.30634e-11	7.51443e-20	3.05424e-21	1.87249e-19	10.4807	0.606061	0.348718	0.778261	0.25	0.363372
Tec	1.50512	0.309	0.135	3.30755e-11	2.59771e-12	1.97726e-13	3.17618e-14	10.4805	0.439394	0.112821	0.4	0.184211	0.101744
Olfm1	-0.868105	0.302	0.42	3.3658e-11	1.63642e-14	4.4426e-07	6.03532e-10	10.4729	0.287879	0.312821	0.3	0.434211	0.409884
Marf1	1.10615	0.452	0.25	3.59596e-11	9.80838e-13	3.41026e-14	4.02498e-14	10.4442	0.598485	0.25641	0.534783	0.276316	0.232558
Abcb4	0.967079	0.237	0.122	3.71185e-11	2.39117e-11	5.14383e-07	2.75078e-06	10.4304	0.0833333	0.348718	0.230435	0.0745614	0.15407
Creb3l2	1.04583	0.467	0.253	3.75417e-11	2.00837e-12	8.48425e-15	3.95823e-14	10.4255	0.431818	0.323077	0.608696	0.236842	0.264535
Rab35	-0.555264	0.761	0.843	3.78055e-11	2.0032e-13	1.3827e-12	1.37631e-13	10.4224	0.727273	0.887179	0.656522	0.894737	0.80814
Dnajc10	1.09655	0.424	0.22	3.83622e-11	4.66126e-13	7.76965e-14	2.92351e-13	10.4161	0.44697	0.317949	0.5	0.289474	0.174419
H2-T24	0.62416	0.758	0.554	3.86046e-11	7.33978e-13	4.40923e-14	7.7629e-14	10.4134	0.780303	0.661538	0.804348	0.565789	0.546512
Pirb	0.755243	0.677	0.456	3.87576e-11	2.98364e-14	1.93189e-15	1.08946e-14	10.4116	0.757576	0.523077	0.752174	0.517544	0.415698
Fcnb	1.14764	0.264	0.14	3.9148e-11	4.81675e-16	8.51843e-08	2.0852e-07	10.4073	0.0833333	0.358974	0.286957	0.166667	0.122093
Pole4	-0.340232	0.964	0.981	3.95065e-11	8.662e-14	3.10134e-10	1.57701e-09	10.4033	0.901515	0.958974	0.96087	0.97807	0.982558
Dnajc9	-0.443464	0.971	0.997	4.0584e-11	9.52469e-14	8.16014e-18	1.00825e-17	10.3916	0.901515	0.984615	0.956522	0.995614	0.997093
Rnf38	0.6233	0.698	0.481	4.30973e-11	5.57991e-12	9.16244e-13	3.59392e-13	10.3655	0.727273	0.697436	0.673913	0.491228	0.473837
Shmt2	-0.596947	0.803	0.928	4.31154e-11	7.56101e-13	2.00949e-18	3.34853e-18	10.3654	0.583333	0.933333	0.769565	0.899123	0.947674
Thap12	-0.48506	0.709	0.808	4.49577e-11	6.90179e-13	2.32369e-10	2.02606e-10	10.3472	0.734848	0.774359	0.634783	0.864035	0.770349
Usp34	0.852635	0.641	0.409	4.50369e-11	1.64809e-13	6.31397e-17	4.03387e-16	10.3464	0.818182	0.471795	0.686957	0.434211	0.392442
Psmd8	1.1817	0.413	0.189	4.50675e-11	4.49597e-11	2.06378e-16	8.67999e-16	10.3461	0.386364	0.307692	0.517391	0.27193	0.133721
Pclaf	0.97091	0.503	0.262	4.52346e-11	9.64025e-13	1.9264e-16	5.44081e-16	10.3445	0.318182	0.507692	0.604348	0.377193	0.186047
Mff	0.90432	0.526	0.304	4.79472e-11	1.58316e-12	2.95276e-14	9.21347e-14	10.3192	0.575758	0.4	0.608696	0.350877	0.273256
St6gal1	0.728567	0.763	0.573	4.94982e-11	3.28725e-13	9.57676e-16	1.66248e-15	10.3054	0.856061	0.471795	0.930435	0.631579	0.534884
Clk1	0.811537	0.7	0.484	4.96896e-11	9.39098e-14	1.71101e-16	4.00096e-16	10.3037	0.886364	0.487179	0.76087	0.609649	0.401163
Ube2g1	-0.51621	0.731	0.806	5.09933e-11	1.74918e-12	9.89497e-10	2.62872e-11	10.2925	0.681818	0.825641	0.647826	0.820175	0.796512
Snx18	0.950692	0.533	0.313	5.14946e-11	5.83397e-12	2.95383e-15	1.42852e-14	10.2882	0.712121	0.374359	0.569565	0.368421	0.276163
Mtch1	0.65004	0.828	0.628	5.15929e-11	1.22446e-12	6.81039e-17	6.8197e-17	10.2874	0.893939	0.697436	0.886957	0.662281	0.604651
Ube4b	-0.384106	0.952	0.977	5.23683e-11	2.2098e-13	1.35373e-13	6.35774e-13	10.2809	0.924242	0.974359	0.921739	0.973684	0.979651
Hectd1	0.718105	0.61	0.372	5.36648e-11	1.44807e-11	4.01493e-14	9.37156e-15	10.2703	0.689394	0.610256	0.569565	0.403509	0.351744
Tac2	-1.36021	0.269	0.432	5.48829e-11	8.17229e-16	3.16924e-12	1.36476e-17	10.2606	0.128788	0.533333	0.126087	0.328947	0.5
C2cd3	-0.459737	0.763	0.872	5.59665e-11	4.99253e-13	4.14976e-11	1.08111e-10	10.2521	0.780303	0.841026	0.66087	0.868421	0.875
Bcl2l13	0.930785	0.427	0.236	5.68829e-11	5.1721e-12	4.14724e-12	3.057e-11	10.245	0.424242	0.405128	0.447826	0.258772	0.22093
Arfgap1	1.27429	0.372	0.17	6.07482e-11	5.45685e-12	1.39567e-14	4.25387e-14	10.2165	0.454545	0.261538	0.417391	0.20614	0.145349
Agtrap	1.07322	0.411	0.184	6.10951e-11	6.9855e-12	4.58424e-16	1.62492e-16	10.214	0.386364	0.34359	0.482609	0.157895	0.200581
Pde2a	1.00123	0.528	0.299	6.14454e-11	6.68882e-14	4.05651e-16	2.2252e-15	10.2115	0.727273	0.384615	0.534783	0.333333	0.276163
Rtp4	1.24174	0.397	0.185	6.2313e-11	9.85539e-13	8.4981e-16	5.58486e-15	10.2054	0.590909	0.210256	0.443478	0.315789	0.0988372
Jtb	-0.359392	0.869	0.902	6.38594e-11	1.84187e-11	7.36739e-09	6.08761e-09	10.1948	0.795455	0.933333	0.821739	0.921053	0.889535
Ctsg	0.775303	0.458	0.353	6.65354e-11	3.81593e-46	4.33082e-05	4.03064e-05	10.1769	0.151515	0.635897	0.486957	0.350877	0.354651
Fcrla	0.95175	0.6	0.372	6.96802e-11	1.77036e-14	3.25499e-16	1.07237e-15	10.1569	0.757576	0.297436	0.76087	0.45614	0.31686
Cd38	1.3839	0.345	0.161	7.04603e-11	4.53933e-12	1.78004e-13	1.04396e-13	10.1521	0.386364	0.158974	0.478261	0.223684	0.119186
Trim30a	1.02038	0.557	0.301	7.06088e-11	5.05372e-13	1.85231e-18	6.84658e-18	10.1511	0.712121	0.297436	0.686957	0.385965	0.244186
Snx1	0.719549	0.686	0.474	7.23176e-11	6.48532e-14	1.82807e-13	1.98873e-13	10.1408	0.787879	0.579487	0.708696	0.447368	0.491279
Tcf12	0.953863	0.506	0.274	7.28836e-11	2.66761e-11	1.22696e-15	5.55193e-15	10.1374	0.492424	0.446154	0.565217	0.307018	0.252907
Cct6a	-0.493005	0.89	0.972	7.44128e-11	3.92843e-13	2.37121e-17	1.00766e-17	10.1284	0.818182	0.974359	0.821739	0.964912	0.976744
Rnf114	-0.3622	0.842	0.878	7.45402e-11	2.48627e-12	1.68884e-07	2.6767e-08	10.1276	0.840909	0.866667	0.786957	0.916667	0.851744
Psmb2	0.707365	0.759	0.549	7.46493e-11	2.67025e-13	6.57362e-17	4.30659e-16	10.127	0.825758	0.584615	0.852174	0.600877	0.514535
Suds3	-0.473142	0.831	0.883	7.5095e-11	1.37346e-12	1.10181e-11	1.64228e-12	10.1244	0.780303	0.866667	0.795652	0.837719	0.912791
Zbtb37	1.4598	0.296	0.126	7.8306e-11	6.02532e-12	5.43963e-13	4.04144e-13	10.1062	0.416667	0.194872	0.313043	0.175439	0.0930233
Nub1	1.14431	0.443	0.21	8.0197e-11	3.20136e-11	5.11374e-17	2.18707e-16	10.0958	0.583333	0.235897	0.53913	0.263158	0.174419
Epb41l3	1.16531	0.373	0.175	8.09818e-11	1.32776e-11	6.75757e-14	2.90333e-13	10.0916	0.409091	0.271795	0.43913	0.153509	0.188953
Lifr	1.20949	0.393	0.18	8.43028e-11	1.07491e-11	2.05418e-15	8.3514e-15	10.0742	0.568182	0.210256	0.447826	0.245614	0.136628
Exoc7	1.29341	0.352	0.154	8.43516e-11	1.69581e-11	1.04996e-14	4.66521e-14	10.0739	0.401515	0.246154	0.413043	0.144737	0.159884
Tapbp	-0.198144	0.989	0.988	8.44486e-11	1.02478e-13	0.000165699	0.000414599	10.0734	0.94697	0.979487	0.995652	0.982456	0.991279
Rhot2	-0.543971	0.761	0.855	8.572e-11	1.71507e-13	1.9052e-14	2.9414e-14	10.0669	0.765152	0.820513	0.686957	0.789474	0.898256
Slc2a1	-0.573645	0.44	0.493	8.66252e-11	8.31839e-13	0.000287899	3.95206e-10	10.0624	0.462121	0.476923	0.4	0.535088	0.465116
Polr3e	1.01734	0.445	0.241	8.66606e-11	2.24613e-11	1.37782e-13	6.11781e-13	10.0622	0.515152	0.384615	0.456522	0.263158	0.226744
Rprd2	-0.415736	0.813	0.876	9.13548e-11	2.26263e-12	4.39707e-11	3.77309e-11	10.0393	0.833333	0.887179	0.713043	0.885965	0.869186
Get4	-0.484129	0.885	0.965	9.54532e-11	7.56724e-12	1.04179e-18	5.13005e-19	10.0202	0.787879	0.974359	0.821739	0.964912	0.965116
Taok2	-0.520822	0.732	0.806	9.71193e-11	7.60714e-12	2.77784e-11	3.48604e-13	10.0127	0.80303	0.764103	0.634783	0.828947	0.790698
Stom	0.304742	0.693	0.575	1.0483e-10	2.03712e-15	6.85058e-05	0.000164185	9.97951	0.454545	0.815385	0.704348	0.47807	0.639535
Dock8	0.872328	0.531	0.304	1.05028e-10	2.11545e-12	7.94186e-15	4.02808e-14	9.97869	0.530303	0.410256	0.634783	0.368421	0.261628
Aida	1.58196	0.259	0.096	1.05494e-10	7.29251e-11	4.39718e-13	6.19826e-13	9.97677	0.340909	0.112821	0.334783	0.0877193	0.101744
Psmd4	0.393224	0.896	0.79	1.06989e-10	1.39052e-11	2.24735e-10	1.12806e-09	9.97066	0.893939	0.866667	0.908696	0.77193	0.802326
Clip1	1.03834	0.476	0.257	1.08111e-10	7.28105e-12	3.17587e-15	2.0682e-14	9.96613	0.545455	0.374359	0.521739	0.302632	0.226744
Nfkbia	0.635993	0.851	0.71	1.09216e-10	1.126e-12	1.78929e-14	1.84004e-14	9.96171	0.893939	0.717949	0.9	0.72807	0.697674
Cr2	-0.364113	0.815	0.881	1.09308e-10	9.37463e-85	0.00801489	0.00351918	9.96135	0.810606	0.661538	0.882609	0.864035	0.892442
Actn1	0.617746	0.783	0.615	1.11485e-10	3.64464e-14	1.36933e-12	1.84783e-12	9.95278	0.863636	0.676923	0.8	0.649123	0.593023
Myh10	0.825229	0.325	0.187	1.12359e-10	3.98754e-12	1.36491e-07	6.35683e-07	9.94939	0.204545	0.420513	0.313043	0.175439	0.194767
Pigs	0.927307	0.542	0.325	1.14539e-10	1.32676e-12	4.39714e-14	9.10863e-14	9.94105	0.621212	0.379487	0.634783	0.350877	0.30814
Nod1	1.19851	0.4	0.185	1.14648e-10	7.23724e-11	9.70817e-16	5.22987e-15	9.94063	0.416667	0.251282	0.517391	0.236842	0.151163
Twf2	-0.381627	0.804	0.809	1.15162e-10	4.80738e-13	9.19208e-07	1.05044e-10	9.93869	0.795455	0.805128	0.773913	0.881579	0.761628
Eif5	-0.376273	0.998	1	1.16063e-10	3.60373e-13	2.0348e-17	2.09318e-16	9.9353	0.992424	0.994872	1	1	1
Ubl3	-0.270528	0.934	0.937	1.20646e-10	3.89759e-13	6.59636e-06	2.03193e-06	9.91849	0.939394	0.892308	0.934783	0.942982	0.93314
Agap1	0.913611	0.377	0.215	1.28682e-10	2.05815e-12	1.49248e-09	7.07457e-09	9.89048	0.356061	0.364103	0.4	0.276316	0.174419
Casd1	1.67305	0.259	0.082	1.30252e-10	3.31841e-11	2.62012e-15	7.69858e-15	9.88522	0.318182	0.189744	0.282609	0.0877193	0.0784884
Ctr9	1.2453	0.316	0.154	1.35952e-10	1.35414e-10	2.41945e-11	6.23541e-12	9.86661	0.348485	0.25641	0.347826	0.175439	0.139535
Sgta	-0.490442	0.709	0.809	1.38048e-10	6.33344e-12	2.55555e-11	4.32147e-11	9.85997	0.69697	0.810256	0.617391	0.837719	0.790698
Top2b	0.436686	0.914	0.857	1.39819e-10	1.76497e-11	6.22095e-13	2.53018e-12	9.85443	0.939394	0.851282	0.934783	0.855263	0.857558
Cirbp	0.633496	0.765	0.573	1.41134e-10	8.8086e-13	9.33668e-14	1.91157e-13	9.85037	0.727273	0.794872	0.752174	0.592105	0.561047
Pou2f1	1.20147	0.408	0.187	1.42762e-10	2.61804e-11	7.13054e-16	2.11603e-15	9.84539	0.469697	0.251282	0.504348	0.267544	0.133721
Faah	1.38735	0.329	0.14	1.47435e-10	4.07969e-11	1.85748e-14	5.43205e-14	9.8314	0.5	0.235897	0.308696	0.162281	0.125
Imp3	-0.417008	0.892	0.932	1.48009e-10	5.14802e-13	3.10529e-12	3.53044e-12	9.82971	0.856061	0.912821	0.847826	0.947368	0.921512
Ciao2a	1.05393	0.458	0.224	1.48863e-10	7.64602e-12	1.68487e-16	6.01761e-16	9.82721	0.439394	0.379487	0.534783	0.29386	0.177326
Srp9	-0.317572	0.907	0.935	1.50536e-10	9.04662e-12	7.01019e-08	7.85447e-08	9.82236	0.840909	0.897436	0.904348	0.929825	0.938953
Foxp1	1.0463	0.513	0.306	1.50577e-10	3.14762e-13	4.06815e-14	3.51327e-14	9.82224	0.719697	0.292308	0.582609	0.372807	0.261628
Mapkap1	1.31136	0.334	0.147	1.55043e-10	1.16098e-10	7.38376e-14	2.35646e-13	9.80955	0.416667	0.230769	0.373913	0.219298	0.0988372
Crebrf	1.0418	0.488	0.257	1.56219e-10	3.39372e-12	2.95721e-16	1.84261e-15	9.80627	0.613636	0.348718	0.534783	0.29386	0.232558
Polr2a	0.818029	0.628	0.379	1.61706e-10	3.43838e-12	5.76339e-16	2.51703e-16	9.79127	0.674242	0.533333	0.686957	0.407895	0.360465
Igkv8-27	1.64977	0.244	0.128	1.62352e-10	2.40263e-18	1.26882e-07	2.07296e-08	9.78954	0.265152	0.102564	0.352174	0.153509	0.110465
Hnrnpm	-0.337185	0.996	1	1.63068e-10	1.91343e-15	2.52822e-18	1.37234e-17	9.78763	0.984848	0.989744	1	1	1
S1pr4	0.750345	0.772	0.601	1.71336e-10	2.10795e-17	2.72908e-12	3.52263e-13	9.76615	0.878788	0.635897	0.804348	0.530702	0.648256
Anxa4	-0.422431	0.709	0.642	1.7264e-10	6.43638e-20	0.315198	2.45639e-11	9.76286	0.719697	0.594872	0.791304	0.622807	0.65407
Ppp2ca	-0.415907	0.889	0.916	1.72889e-10	1.34959e-11	9.8362e-12	1.80839e-12	9.76223	0.848485	0.938462	0.83913	0.947368	0.895349
Sqstm1	-0.305018	0.98	0.991	1.7796e-10	8.13139e-13	1.57134e-09	4.36291e-09	9.74968	0.962121	0.974359	0.973913	0.995614	0.988372
Pim2	1.42738	0.3	0.129	1.7808e-10	2.59705e-11	8.24969e-13	9.15791e-13	9.74938	0.333333	0.164103	0.395652	0.153509	0.113372
Snx13	1.46927	0.298	0.117	1.79474e-10	3.59033e-11	4.06752e-14	1.21663e-13	9.746	0.386364	0.128205	0.391304	0.179825	0.0755814
Col4a1	-0.614903	0.713	0.745	1.84824e-10	5.08324e-23	5.81874e-06	1.45012e-09	9.73324	0.765152	0.692308	0.708696	0.763158	0.732558
Slc30a9	0.699296	0.513	0.332	1.88066e-10	1.29652e-11	3.94648e-10	2.55228e-09	9.72569	0.462121	0.553846	0.508696	0.346491	0.322674
Manf	-0.287625	0.989	0.988	1.88433e-10	3.35018e-25	0.00281116	0.00215996	9.72484	0.909091	0.989744	0.991304	1	0.979651
Akr1a1	0.508576	0.935	0.867	1.89027e-10	2.91332e-13	5.50688e-19	4.01437e-17	9.72348	0.969697	0.841026	0.995652	0.855263	0.875
Zcchc9	-0.568992	0.585	0.668	1.96929e-10	4.26726e-12	3.49067e-08	1.52187e-11	9.70569	0.659091	0.651282	0.473913	0.671053	0.665698
Sirpa	0.582995	0.887	0.733	1.99657e-10	6.29728e-16	1.68602e-17	2.23823e-16	9.69971	0.863636	0.764103	0.965217	0.789474	0.694767
Btnl6	1.227	0.242	0.107	2.02732e-10	2.00908e-10	1.48607e-09	7.14995e-09	9.69308	0.204545	0.169231	0.326087	0.114035	0.101744
Ubap2l	0.653243	0.767	0.559	2.03161e-10	1.32832e-11	1.27363e-15	4.18731e-15	9.69216	0.818182	0.615385	0.847826	0.552632	0.563953
Tnk2	-0.552291	0.892	0.956	2.07349e-10	1.84047e-12	2.761e-18	2.67888e-17	9.6833	0.840909	0.964103	0.808696	0.921053	0.979651
Stk11	0.515892	0.732	0.53	2.09393e-10	1.06066e-11	4.96574e-10	1.08951e-11	9.67904	0.719697	0.753846	0.708696	0.557018	0.511628
Nras	0.914314	0.539	0.325	2.1761e-10	1.99455e-11	2.17837e-14	9.06783e-14	9.66232	0.674242	0.394872	0.586957	0.368421	0.296512
Crebzf	-0.352652	0.89	0.934	2.18389e-10	3.43293e-12	1.34052e-08	2.21034e-08	9.66077	0.893939	0.933333	0.821739	0.947368	0.924419
Mmut	0.923568	0.431	0.233	2.21019e-10	6.67546e-11	1.86612e-12	8.59181e-12	9.65557	0.348485	0.471795	0.443478	0.20614	0.25
Clint1	0.513182	0.867	0.663	2.22419e-10	7.40817e-12	5.58931e-14	2.0699e-16	9.65283	0.871212	0.815385	0.882609	0.723684	0.622093
Lnpep	0.998388	0.515	0.281	2.23258e-10	7.76658e-12	7.57149e-16	2.2652e-15	9.65119	0.636364	0.307692	0.626087	0.315789	0.258721
Rab4b	-0.398871	0.661	0.705	2.29047e-10	6.39157e-13	3.48752e-05	4.97017e-07	9.64008	0.628788	0.625641	0.686957	0.789474	0.648256
Mcu	0.844657	0.461	0.271	2.3137e-10	5.2013e-11	2.3859e-11	1.20602e-10	9.63569	0.484848	0.466667	0.443478	0.337719	0.226744
Helz2	0.766258	0.74	0.537	2.43582e-10	2.04934e-13	4.45611e-15	5.18376e-15	9.61336	0.871212	0.517949	0.826087	0.605263	0.491279
Gosr2	0.777455	0.654	0.421	2.44434e-10	1.95248e-11	2.08607e-15	3.71263e-15	9.61184	0.765152	0.476923	0.73913	0.447368	0.40407
Sppl2a	0.903301	0.54	0.327	2.50759e-10	3.63876e-11	2.00584e-14	9.84658e-14	9.60074	0.613636	0.389744	0.630435	0.399123	0.27907
Xpnpep1	-0.598921	0.855	0.949	2.51426e-10	7.57448e-12	8.99056e-19	1.79354e-18	9.59959	0.780303	0.958974	0.765217	0.912281	0.973837
Cat	0.393882	0.93	0.874	2.59022e-10	8.46956e-19	1.263e-05	1.19002e-05	9.58666	0.901515	0.948718	0.930435	0.802632	0.921512
Numa1	0.462226	0.899	0.759	2.62076e-10	1.39303e-11	9.11275e-13	5.51215e-13	9.58157	0.878788	0.876923	0.895652	0.75	0.764535
Tcf20	0.609495	0.792	0.643	2.67834e-10	1.9044e-11	1.90715e-13	3.6492e-13	9.57214	0.856061	0.671795	0.852174	0.657895	0.633721
Fcgrt	1.04359	0.522	0.301	2.68881e-10	4.26777e-16	1.55947e-14	4.09575e-14	9.57044	0.719697	0.266667	0.630435	0.302632	0.299419
Ctdsp1	-0.322427	0.993	0.998	2.69683e-10	9.11087e-13	2.052e-14	7.89854e-14	9.56915	0.969697	0.994872	0.986957	1	0.997093
Cdt1	0.386948	0.763	0.628	2.76197e-10	2.90014e-13	1.43923e-06	1.45792e-06	9.55878	0.643939	0.841026	0.743478	0.570175	0.665698
Vps35	-0.538451	0.844	0.956	2.8593e-10	2.71521e-11	4.3574e-18	7.12999e-19	9.54374	0.772727	0.964103	0.743478	0.934211	0.97093
Rnf14	-0.477703	0.853	0.928	2.90884e-10	1.52611e-11	3.99004e-14	1.51876e-13	9.53628	0.772727	0.94359	0.778261	0.934211	0.924419
Zfr	0.845012	0.58	0.35	3.02737e-10	9.68376e-12	1.82582e-15	1.22539e-14	9.51893	0.712121	0.435897	0.626087	0.399123	0.31686
Prpf4b	0.742121	0.693	0.455	3.1909e-10	8.87017e-12	2.0051e-15	8.27883e-16	9.49609	0.810606	0.523077	0.765217	0.565789	0.380814
Akap12	1.3379	0.307	0.131	3.22176e-10	2.74478e-11	3.67527e-13	1.59656e-12	9.49191	0.462121	0.169231	0.334783	0.157895	0.113372
Emc7	-0.516281	0.801	0.897	3.47451e-10	9.98299e-12	3.36836e-14	1.53893e-13	9.45911	0.719697	0.897436	0.73913	0.907895	0.889535
Yipf4	0.537144	0.671	0.467	3.47919e-10	5.56417e-12	8.51465e-11	2.6923e-11	9.45852	0.606061	0.666667	0.708696	0.412281	0.502907
Ehmt2	0.78903	0.689	0.474	3.47928e-10	2.35069e-12	1.75922e-15	5.00672e-15	9.45851	0.848485	0.420513	0.817391	0.491228	0.462209
Gimap6	0.767072	0.822	0.787	3.48774e-10	5.12597e-26	7.33461e-13	1.08962e-18	9.45746	0.901515	0.579487	0.943478	0.811404	0.770349
P3h2	1.16762	0.314	0.136	3.55276e-10	1.72487e-10	1.56621e-12	3.88811e-12	9.44943	0.333333	0.235897	0.369565	0.197368	0.0959302
Smarcc2	0.761498	0.621	0.434	3.60171e-10	9.10238e-12	2.47418e-12	4.34058e-12	9.44349	0.75	0.502564	0.652174	0.482456	0.401163
Arrdc3	1.04799	0.381	0.22	3.61377e-10	1.66194e-11	4.27852e-10	1.71474e-10	9.44204	0.484848	0.338462	0.356522	0.280702	0.180233
Rbm25	-0.376881	0.941	0.995	3.74133e-10	1.6099e-12	2.11442e-13	4.61574e-16	9.42697	0.893939	0.974359	0.878261	0.995614	0.994186
Tcn2	0.937987	0.512	0.309	3.79407e-10	3.45834e-13	7.25708e-13	2.31231e-12	9.42089	0.621212	0.358974	0.578261	0.324561	0.299419
Cic	1.21419	0.355	0.161	3.80774e-10	3.70772e-10	5.60094e-14	2.6107e-13	9.41933	0.431818	0.210256	0.434783	0.201754	0.133721
Acacb	1.71935	0.266	0.136	3.88078e-10	1.01524e-18	2.07807e-08	6.28377e-09	9.41108	0.340909	0.25641	0.230435	0.122807	0.145349
Acsl1	1.39679	0.228	0.117	3.93866e-10	1.53821e-13	3.99256e-07	2.69445e-07	9.40465	0.257576	0.271795	0.173913	0.122807	0.113372
Hsp90aa1	0.341879	0.978	0.939	4.16252e-10	6.20049e-14	5.22143e-10	2.00174e-09	9.38064	0.924242	0.958974	0.986957	0.942982	0.936047
Myc	0.811878	0.576	0.33	4.19656e-10	8.7258e-12	3.10412e-15	7.687e-16	9.37711	0.590909	0.502564	0.630435	0.377193	0.299419
St3gal2	0.83603	0.469	0.281	4.21631e-10	2.78632e-11	5.17027e-11	2.25225e-10	9.37507	0.492424	0.405128	0.508696	0.245614	0.305233
Acly	0.9499	0.702	0.5	4.43439e-10	1.77137e-21	1.31564e-11	9.33426e-13	9.35317	0.833333	0.517949	0.786957	0.578947	0.447674
Eid1	-0.410215	0.953	0.965	4.45412e-10	5.81279e-12	2.28288e-12	2.04343e-12	9.35124	0.916667	0.974359	0.926087	0.942982	0.979651
Clu	-0.215786	0.869	0.886	4.51639e-10	7.06894e-33	0.504637	0.499633	9.34521	0.916667	0.74359	0.904348	0.890351	0.883721
Sprtn	1.06199	0.357	0.175	5.06567e-10	2.82782e-10	3.57633e-12	2.0635e-11	9.29536	0.371212	0.34359	0.36087	0.201754	0.156977
Ets2	1.1716	0.375	0.173	5.15723e-10	1.00438e-10	1.61662e-14	1.02979e-13	9.28758	0.44697	0.179487	0.5	0.162281	0.180233
Ehbp1l1	-0.539553	0.899	0.967	5.32638e-10	3.36167e-10	3.56901e-19	6.12314e-19	9.27357	0.787879	0.969231	0.873913	0.934211	0.988372
Arpc4	-0.276946	0.98	0.993	5.36339e-10	1.13286e-13	3.84913e-08	7.69778e-08	9.27056	0.893939	0.994872	0.978261	1	0.988372
Sumo2	-0.254895	1	1	5.44196e-10	3.4192e-17	1.20206e-14	3.77632e-13	9.26424	0.969697	1	1	1	1
Itpa	-0.495585	0.715	0.785	5.46545e-10	2.31328e-11	2.78892e-09	2.84676e-11	9.26237	0.689394	0.810256	0.634783	0.846491	0.744186
Pcbp2	-0.161438	1	1	5.67972e-10	5.46303e-15	1.34569e-07	1.72481e-06	9.24567	0.992424	1	1	1	1
Rela	-0.37274	0.885	0.914	6.16436e-10	4.58151e-12	7.79545e-09	4.97284e-09	9.21011	0.863636	0.887179	0.865217	0.929825	0.90407
Tpm2	1.03202	0.447	0.264	6.17286e-10	4.99021e-16	2.96954e-11	8.63032e-11	9.20951	0.590909	0.338462	0.456522	0.289474	0.247093
Guk1	0.763047	0.609	0.365	6.23378e-10	1.08757e-11	7.22331e-15	2.07637e-15	9.20525	0.621212	0.528205	0.669565	0.425439	0.325581
Ywhaz	0.352836	1	1	6.29522e-10	5.16248e-19	2.1399e-16	2.55865e-13	9.20099	0.977273	1	1	1	1
Canx	0.425419	0.962	0.874	6.35046e-10	1.57555e-11	1.73998e-15	1.7921e-15	9.19719	0.94697	0.928205	0.986957	0.885965	0.866279
Kdelr2	-0.352925	0.953	0.969	6.4449e-10	7.30299e-13	5.73664e-10	1.32313e-09	9.19078	0.856061	0.974359	0.96087	0.964912	0.97093
Atp5k	-0.371516	0.952	0.986	6.60426e-10	3.67316e-12	1.13893e-12	3.53228e-12	9.18018	0.939394	0.989744	0.913043	0.995614	0.979651
Tagap	1.09974	0.447	0.238	6.68615e-10	2.95812e-11	1.91863e-14	6.94545e-14	9.17482	0.674242	0.271795	0.465217	0.280702	0.209302
Pls1	1.21891	0.251	0.115	6.81951e-10	7.80976e-11	3.16894e-09	1.34278e-08	9.16625	0.19697	0.205128	0.321739	0.140351	0.0988372
Ibtk	0.610022	0.691	0.486	6.94739e-10	1.58636e-11	1.76887e-12	3.93659e-12	9.15818	0.69697	0.630769	0.730435	0.473684	0.494186
Nr3c1	0.867151	0.567	0.346	7.14115e-10	1.20619e-10	2.15897e-14	7.22326e-14	9.14623	0.765152	0.394872	0.6	0.403509	0.30814
Clic1	-0.204028	0.989	0.998	7.18494e-10	4.98001e-14	2.06798e-05	0.000109985	9.14358	0.916667	0.994872	0.982609	1	0.997093
Pcdh12	1.32591	0.239	0.103	7.22288e-10	7.54506e-11	1.03937e-09	3.54116e-09	9.14129	0.272727	0.148718	0.295652	0.0964912	0.107558
Rnf213	0.873099	0.607	0.362	7.26036e-10	8.56575e-13	9.45489e-18	1.37865e-16	9.13904	0.757576	0.45641	0.652174	0.45614	0.299419
Nbr1	1.17827	0.339	0.163	7.28499e-10	3.58812e-10	2.74837e-12	1.05898e-11	9.13757	0.431818	0.261538	0.352174	0.175439	0.15407
Gramd4	0.672656	0.686	0.455	7.83843e-10	3.00212e-11	2.15124e-13	2.09133e-14	9.10577	0.765152	0.738462	0.595652	0.508772	0.418605
Psma5	-0.493699	0.82	0.925	7.94544e-10	9.89791e-11	2.09239e-16	3.2624e-15	9.09988	0.689394	0.953846	0.734783	0.912281	0.93314
Serpina3n	-0.77189	0.276	0.355	7.99997e-10	4.7203e-16	0.000496962	2.98015e-06	9.09691	0.401515	0.353846	0.13913	0.438596	0.299419
Bmp6	1.30137	0.262	0.114	8.20005e-10	1.71092e-10	1.11833e-10	4.1322e-10	9.08618	0.30303	0.194872	0.295652	0.135965	0.0988372
Ak6	-0.460362	0.853	0.934	8.26521e-10	2.55172e-11	4.01329e-15	6.0363e-14	9.08275	0.727273	0.928205	0.813043	0.938596	0.930233
Slc43a1	0.400503	0.497	0.362	8.27384e-10	1.02067e-12	2.66963e-05	1.96557e-05	9.08229	0.371212	0.630769	0.456522	0.324561	0.386628
Dennd1a	1.20826	0.298	0.131	8.33047e-10	1.42318e-10	6.8747e-12	3.88632e-11	9.07933	0.280303	0.235897	0.36087	0.118421	0.139535
Bri3bp	-0.537747	0.555	0.656	8.75048e-10	2.44925e-11	2.15066e-07	1.44751e-08	9.05797	0.492424	0.65641	0.5	0.697368	0.627907
Wdr33	0.724055	0.675	0.467	8.8479e-10	9.2901e-11	4.40341e-14	1.39907e-13	9.05316	0.75	0.569231	0.717391	0.548246	0.412791
Pck2	-0.60089	0.944	0.949	8.86173e-10	1.15372e-19	2.20899e-14	6.39588e-16	9.05248	0.80303	0.994872	0.93913	0.903509	0.979651
Add3	0.673752	0.788	0.582	9.04331e-10	7.9581e-13	7.58097e-15	3.34345e-15	9.04367	0.863636	0.702564	0.791304	0.596491	0.572674
Mtln	-0.540835	0.72	0.778	9.09402e-10	8.92169e-12	3.37141e-10	1.35461e-13	9.04124	0.651515	0.810256	0.665217	0.692982	0.834302
Ppp2r5e	1.31086	0.329	0.143	9.11217e-10	2.09511e-10	9.59746e-14	4.10273e-13	9.04038	0.44697	0.158974	0.404348	0.201754	0.104651
Txnip	0.614591	0.869	0.799	9.16452e-10	3.50818e-15	1.41574e-12	6.44328e-14	9.03789	0.992424	0.687179	0.947826	0.824561	0.781977
Des	1.00461	0.499	0.276	9.2118e-10	9.70008e-12	4.35294e-15	2.03132e-14	9.03566	0.765152	0.307692	0.508696	0.346491	0.229651
Ski	-0.286562	0.91	0.927	9.3438e-10	3.59478e-13	2.5861e-05	2.12432e-05	9.02948	0.916667	0.887179	0.9	0.947368	0.912791
Frmd4b	0.848796	0.46	0.264	9.37344e-10	1.34735e-10	2.8835e-12	3.33116e-11	9.0281	0.431818	0.425641	0.504348	0.289474	0.247093
Sema6d	0.963484	0.451	0.22	9.57865e-10	6.09907e-11	6.08042e-15	7.92218e-16	9.0187	0.515152	0.323077	0.521739	0.267544	0.188953
Adgre5	-0.24534	0.973	0.967	1.00302e-09	1.96074e-13	4.07638e-05	7.52945e-05	8.99869	0.939394	0.958974	0.973913	0.964912	0.968023
Sorbs1	0.93811	0.325	0.21	1.02731e-09	1.63965e-12	6.40208e-06	7.66022e-06	8.9883	0.356061	0.420513	0.226087	0.214912	0.206395
Dgki	1.39788	0.196	0.08	1.03347e-09	9.87295e-11	1.4441e-08	4.80433e-08	8.9857	0.151515	0.133333	0.273913	0.0789474	0.0813953
Nde1	-0.506912	0.84	0.967	1.05367e-09	1.27306e-10	9.97322e-21	6.14231e-22	8.9773	0.765152	0.964103	0.726087	0.973684	0.962209
Wipi2	0.654664	0.605	0.409	1.0654e-09	2.48841e-11	6.78907e-11	1.50995e-10	8.97249	0.643939	0.564103	0.617391	0.412281	0.406977
Prr13	0.984567	0.424	0.231	1.13579e-09	2.44168e-10	1.84149e-12	1.0242e-11	8.9447	0.401515	0.384615	0.469565	0.25	0.218023
Tbck	1.08304	0.395	0.201	1.14201e-09	4.22754e-10	4.04164e-13	2.02639e-12	8.94233	0.55303	0.287179	0.395652	0.223684	0.186047
Rab11a	0.516191	0.829	0.668	1.16443e-09	8.47815e-11	2.43458e-11	1.31237e-11	8.93389	0.840909	0.758974	0.856522	0.701754	0.645349
Acta2	1.49554	0.305	0.154	1.17367e-09	8.65482e-16	3.01797e-10	1.98978e-10	8.93045	0.492424	0.164103	0.317391	0.175439	0.139535
Parn	1.03335	0.393	0.206	1.20552e-09	5.58514e-10	1.70563e-12	1.04171e-11	8.91883	0.477273	0.266667	0.452174	0.188596	0.218023
Sf3b3	-0.42802	0.955	0.991	1.27092e-09	8.65941e-12	7.15158e-18	5.84078e-18	8.89588	0.924242	0.994872	0.908696	0.97807	1
Nfyb	1.06714	0.364	0.185	1.27904e-09	1.01623e-09	8.29271e-12	3.90229e-11	8.89312	0.454545	0.307692	0.36087	0.210526	0.168605
Sirt2	0.815945	0.555	0.346	1.31063e-09	2.90789e-11	1.21229e-12	3.68539e-12	8.88252	0.643939	0.441026	0.6	0.307018	0.372093
Rel	1.20935	0.386	0.191	1.38715e-09	2.45041e-11	1.04552e-13	3.32813e-13	8.85788	0.560606	0.246154	0.404348	0.276316	0.133721
Pcf11	-0.397485	0.831	0.89	1.40726e-09	1.08317e-11	4.28827e-09	5.12721e-09	8.85163	0.856061	0.85641	0.752174	0.890351	0.889535
Pde7a	0.796685	0.671	0.5	1.43061e-09	2.12701e-12	3.92187e-12	9.8468e-13	8.84448	0.848485	0.492308	0.713043	0.495614	0.502907
Syf2	0.651315	0.689	0.481	1.44339e-09	6.38849e-11	1.93486e-12	1.52288e-12	8.84062	0.795455	0.615385	0.691304	0.47807	0.482558
Ube2b	0.453729	0.864	0.795	1.48326e-09	1.36965e-11	2.7918e-09	2.99866e-09	8.82878	0.871212	0.748718	0.934783	0.767544	0.813953
H2afj	-0.533224	0.682	0.766	1.49466e-09	5.23246e-11	6.11675e-10	1.09675e-11	8.82546	0.689394	0.728205	0.617391	0.72807	0.790698
Hnrnpc	0.497936	0.858	0.677	1.53512e-09	8.03266e-11	6.05802e-11	2.93853e-13	8.81386	0.840909	0.820513	0.873913	0.679825	0.674419
Rab1b	0.702536	0.668	0.458	1.54102e-09	1.41613e-10	1.23862e-13	3.75157e-13	8.81219	0.719697	0.553846	0.730435	0.47807	0.444767
Dync1i2	0.677072	0.709	0.483	1.56543e-09	1.46093e-10	7.74891e-15	8.7032e-15	8.80537	0.780303	0.605128	0.752174	0.491228	0.476744
Nlk	1.09198	0.373	0.18	1.56828e-09	3.02298e-10	3.34795e-13	1.88563e-12	8.80458	0.454545	0.323077	0.369565	0.20614	0.162791
Smarcad1	-0.431733	0.781	0.867	1.64915e-09	3.19168e-11	6.9917e-10	1.59976e-09	8.78274	0.765152	0.866667	0.682609	0.890351	0.851744
Samsn1	0.826362	0.582	0.357	1.70516e-09	7.89837e-11	1.24526e-14	5.40956e-14	8.76823	0.606061	0.538462	0.604348	0.45614	0.290698
Sh3glb1	0.43565	0.894	0.783	1.71884e-09	1.19389e-12	1.1438e-09	2.00891e-09	8.76477	0.909091	0.820513	0.943478	0.789474	0.77907
Osbpl1a	0.939654	0.311	0.182	1.7472e-09	1.66112e-10	1.54114e-07	2.49984e-07	8.75766	0.280303	0.379487	0.269565	0.192982	0.174419
S100a11	0.585349	0.829	0.645	1.74888e-09	2.10461e-12	3.07775e-14	3.16696e-14	8.75724	0.825758	0.712821	0.930435	0.684211	0.619186
Wipf1	0.965876	0.537	0.336	1.75248e-09	5.9109e-13	2.55756e-13	3.73105e-13	8.75635	0.734848	0.302564	0.621739	0.385965	0.302326
Top2a	0.565197	0.637	0.435	1.75958e-09	2.8928e-13	6.73333e-11	6.6152e-11	8.75459	0.409091	0.687179	0.730435	0.469298	0.412791
Khk	1.12342	0.334	0.159	1.77841e-09	6.09522e-10	6.88057e-12	4.0129e-11	8.74997	0.439394	0.25641	0.33913	0.184211	0.142442
Rchy1	0.886335	0.519	0.318	1.81292e-09	1.68347e-10	7.11303e-13	2.38985e-12	8.74162	0.621212	0.384615	0.578261	0.385965	0.273256
Arl4c	1.24439	0.46	0.262	1.8403e-09	4.32754e-18	4.31767e-13	1.79138e-13	8.73511	0.69697	0.282051	0.473913	0.307018	0.232558
C3ar1	-1.72212	0.099	0.156	1.84376e-09	7.20846e-22	0.00185854	3.44056e-06	8.7343	0.0833333	0.0871795	0.117391	0.105263	0.188953
Egfl7	0.866238	0.506	0.276	1.84818e-09	1.09633e-12	7.89594e-15	1.65726e-14	8.73326	0.507576	0.430769	0.569565	0.280702	0.273256
Nol12	1.21766	0.334	0.152	1.87305e-09	1.01331e-09	5.80295e-13	2.93522e-12	8.72745	0.386364	0.261538	0.365217	0.184211	0.130814
Ndrg3	1.23939	0.332	0.159	1.87395e-09	5.96169e-10	3.44756e-12	6.32228e-12	8.72724	0.386364	0.241026	0.378261	0.171053	0.151163
Pla2g15	1.13026	0.345	0.164	1.87977e-09	4.55538e-10	1.65831e-12	1.17032e-11	8.7259	0.409091	0.184615	0.443478	0.184211	0.151163
Btrc	0.672083	0.51	0.316	1.89329e-09	6.90244e-10	2.66909e-10	2.82405e-10	8.72278	0.5	0.497436	0.526087	0.320175	0.313953
Cops6	0.839618	0.548	0.325	1.89703e-09	3.44528e-10	4.39247e-14	1.56643e-13	8.72192	0.674242	0.425641	0.582609	0.381579	0.287791
Vasp	0.435479	0.98	0.965	1.9408e-09	9.29442e-13	3.72843e-15	9.49479e-14	8.71202	0.939394	0.948718	0.995652	0.982456	0.953488
Fhdc1	0.431149	0.413	0.318	1.96356e-09	5.48332e-11	0.000793602	0.00339367	8.70696	0.25	0.564103	0.378261	0.27193	0.348837
Atp13a1	-0.444826	0.722	0.78	1.97688e-09	5.18189e-10	2.8601e-08	2.34499e-10	8.70402	0.757576	0.748718	0.669565	0.828947	0.747093
Trim58	0.38995	0.415	0.308	2.00446e-09	1.34397e-10	0.000389839	0.000775737	8.698	0.280303	0.553846	0.373913	0.236842	0.354651
Carhsp1	0.499626	0.54	0.404	2.04996e-09	1.41407e-10	6.16138e-06	1.65137e-05	8.68825	0.5	0.630769	0.491304	0.464912	0.363372
Tmem11	1.03342	0.388	0.219	2.05606e-09	9.02845e-10	4.5791e-11	3.36543e-11	8.68696	0.44697	0.292308	0.434783	0.236842	0.206395
Ubxn6	1.07441	0.399	0.21	2.32061e-09	3.91053e-11	1.30976e-12	5.95413e-12	8.6344	0.44697	0.261538	0.486957	0.22807	0.197674
Lyn	0.496406	0.964	0.955	2.32952e-09	7.32796e-18	6.83304e-15	7.2833e-15	8.63273	0.931818	0.907692	0.995652	0.969298	0.944767
Clca3a1	0.61453	0.54	0.336	2.43683e-09	1.68518e-12	3.58986e-10	1.59591e-11	8.61317	0.454545	0.553846	0.578261	0.394737	0.296512
Bckdha	1.03834	0.411	0.231	2.48909e-09	1.77999e-10	8.57104e-12	1.88177e-11	8.60396	0.5	0.34359	0.417391	0.263158	0.209302
Vezf1	0.864163	0.517	0.33	2.52545e-09	1.97811e-10	9.28633e-12	1.77091e-11	8.59766	0.598485	0.389744	0.578261	0.377193	0.299419
Apoc1	1.67641	0.237	0.112	2.53919e-09	1.91814e-16	2.22252e-08	5.22038e-08	8.5953	0.431818	0.174359	0.178261	0.118421	0.107558
Cyb5r4	0.788618	0.578	0.358	2.71523e-09	3.61878e-10	9.43723e-14	3.58335e-13	8.56619	0.636364	0.461538	0.647826	0.364035	0.354651
Kazald1	0.971701	0.359	0.208	2.73146e-09	1.70319e-10	2.4666e-09	3.75433e-09	8.56361	0.416667	0.230769	0.434783	0.241228	0.186047
Noct	0.527224	0.424	0.294	2.79172e-09	1.77842e-10	7.99688e-06	3.00723e-05	8.55413	0.333333	0.641026	0.291304	0.320175	0.276163
Tgif1	1.26073	0.316	0.147	2.8446e-09	1.21718e-09	5.76814e-12	1.30174e-11	8.54598	0.386364	0.215385	0.36087	0.179825	0.125
Fndc3a	1.26996	0.3	0.126	2.84615e-09	8.26692e-10	8.54367e-13	4.18446e-12	8.54574	0.325758	0.169231	0.395652	0.131579	0.122093
Rpp14	0.94401	0.409	0.215	2.92014e-09	1.13824e-09	2.67305e-12	1.16204e-11	8.5346	0.462121	0.430769	0.36087	0.289474	0.165698
Impdh2	-0.427866	0.934	0.983	2.93081e-09	6.2793e-11	1.76878e-16	2.11552e-16	8.53301	0.818182	0.994872	0.9	0.982456	0.982558
Prkag1	0.78173	0.478	0.281	3.00483e-09	2.45202e-10	1.45101e-11	7.25386e-11	8.52218	0.469697	0.502564	0.46087	0.324561	0.252907
Pla2g2d	0.914158	0.585	0.372	3.00906e-09	2.90549e-14	5.0694e-14	1.5944e-13	8.52157	0.613636	0.389744	0.726087	0.407895	0.348837
Rnasek	0.904437	0.487	0.271	3.12042e-09	4.07147e-10	5.06727e-14	3.31777e-13	8.50579	0.537879	0.328205	0.591304	0.263158	0.276163
Eif2s2	-0.384697	0.95	0.974	3.12307e-09	1.62839e-10	1.72189e-11	5.38127e-11	8.50542	0.886364	0.974359	0.93913	0.969298	0.976744
Abca7	1.26938	0.303	0.149	3.16935e-09	1.02151e-09	7.79976e-11	1.95529e-11	8.49903	0.363636	0.153846	0.395652	0.201754	0.113372
Calcrl	1.48837	0.228	0.087	3.24124e-09	8.35718e-10	6.30433e-11	1.95367e-10	8.48929	0.310606	0.138462	0.256522	0.118421	0.0668605
Mtss1	1.38561	0.278	0.11	3.24833e-09	1.77259e-10	9.14936e-13	3.61138e-12	8.48834	0.371212	0.174359	0.313043	0.140351	0.0901163
Cd2	0.966858	0.535	0.362	3.2762e-09	2.03181e-13	4.65037e-12	2.28712e-13	8.48463	0.75	0.333333	0.582609	0.412281	0.328488
Ugcg	0.690415	0.731	0.507	3.39973e-09	1.04473e-10	4.37909e-14	8.80801e-15	8.46856	0.818182	0.610256	0.765217	0.587719	0.453488
Fbrs	1.05593	0.429	0.215	3.44296e-09	8.71945e-10	8.69454e-15	5.69036e-14	8.46307	0.522727	0.225641	0.547826	0.267544	0.180233
Ebf1	1.09577	0.44	0.234	3.44634e-09	4.27617e-11	6.04009e-14	2.2402e-13	8.46264	0.636364	0.25641	0.482609	0.276316	0.206395
E2f2	0.27469	0.623	0.497	3.53032e-09	8.94869e-12	0.000494581	6.85873e-05	8.45219	0.409091	0.774359	0.608696	0.47807	0.508721
Bsdc1	0.321645	0.63	0.545	3.53463e-09	6.69347e-10	0.00215178	0.00504283	8.45166	0.530303	0.682051	0.634783	0.548246	0.543605
Maf1	0.89653	0.506	0.281	3.60057e-09	2.49919e-10	5.10117e-15	4.47086e-14	8.44363	0.651515	0.369231	0.53913	0.328947	0.25
Sparcl1	1.14009	0.338	0.156	3.67361e-09	8.57758e-13	3.23214e-12	7.10968e-12	8.43491	0.416667	0.251282	0.365217	0.171053	0.145349
Snx20	-0.351247	0.607	0.631	3.67472e-09	4.22132e-12	0.00433705	2.88043e-05	8.43478	0.719697	0.558974	0.565217	0.679825	0.598837
Usp39	0.742052	0.483	0.299	3.71434e-09	3.63128e-10	2.64158e-10	1.2296e-09	8.43012	0.469697	0.507692	0.469565	0.298246	0.299419
Kpna6	0.961886	0.395	0.227	3.72728e-09	9.37883e-10	2.0711e-10	5.13626e-10	8.42861	0.492424	0.353846	0.373913	0.210526	0.238372
G6pdx	1.03177	0.318	0.166	3.74174e-09	7.63046e-10	1.48366e-09	7.65619e-09	8.42693	0.242424	0.374359	0.313043	0.175439	0.159884
Cd180	-0.411856	0.555	0.596	3.74495e-09	1.18982e-11	0.00105607	5.72185e-06	8.42655	0.583333	0.451282	0.630435	0.609649	0.587209
Tfdp1	-0.547304	0.792	0.923	3.75843e-09	1.78886e-09	1.12874e-17	2.23221e-17	8.42499	0.606061	0.933333	0.717391	0.934211	0.915698
Tagln	0.974306	0.553	0.294	3.89786e-09	5.96398e-17	4.57809e-17	7.93721e-18	8.40917	0.780303	0.435897	0.526087	0.320175	0.276163
Dgkd	0.821387	0.63	0.43	3.90312e-09	1.99666e-12	2.08028e-13	3.54196e-13	8.40859	0.80303	0.435897	0.691304	0.491228	0.389535
Scfd1	0.671153	0.682	0.453	3.94777e-09	6.69242e-10	1.09288e-13	2.89999e-14	8.40365	0.704545	0.646154	0.7	0.482456	0.43314
Vamp5	0.533103	0.562	0.416	3.99861e-09	3.00411e-11	3.71048e-07	2.01878e-06	8.39809	0.44697	0.646154	0.56087	0.45614	0.389535
Mical1	-0.339617	0.711	0.733	4.00678e-09	2.42402e-11	0.000535657	4.44536e-06	8.3972	0.651515	0.687179	0.73913	0.780702	0.700581
Gnptg	1.05393	0.39	0.199	4.08831e-09	3.12132e-09	6.86676e-13	4.99604e-12	8.38846	0.5	0.266667	0.430435	0.197368	0.200581
Lrrc47	0.828574	0.501	0.288	4.14749e-09	3.72316e-09	3.84502e-13	1.68529e-12	8.38221	0.575758	0.410256	0.534783	0.346491	0.25
Kpna4	1.0244	0.404	0.226	4.14948e-09	1.67696e-09	1.07361e-11	2.0075e-11	8.38201	0.545455	0.251282	0.452174	0.276316	0.19186
Zfp362	1.01525	0.458	0.245	4.16028e-09	2.18978e-09	5.8118e-14	1.86213e-13	8.38088	0.568182	0.276923	0.547826	0.320175	0.194767
Nmt1	0.873707	0.47	0.278	4.16644e-09	1.45473e-09	8.57728e-12	4.33557e-11	8.38024	0.5	0.4	0.513043	0.298246	0.264535
Tmc6	1.14143	0.316	0.157	4.17102e-09	3.54023e-10	1.22185e-10	4.15178e-10	8.37976	0.393939	0.261538	0.317391	0.153509	0.159884
Use1	-0.308213	0.847	0.871	4.1855e-09	2.34251e-10	2.47817e-06	7.90496e-07	8.37825	0.856061	0.887179	0.778261	0.912281	0.843023
Lztr1	1.06088	0.363	0.194	4.45337e-09	4.2653e-09	5.43678e-11	9.20689e-11	8.35131	0.401515	0.235897	0.447826	0.25	0.156977
Zmym2	0.976001	0.474	0.26	4.58152e-09	1.15068e-09	9.8185e-14	3.02816e-13	8.33899	0.643939	0.302564	0.521739	0.355263	0.197674
Ssr4	0.507317	0.923	0.799	4.63381e-09	1.97465e-11	2.46243e-12	2.73893e-13	8.33406	0.893939	0.846154	0.973913	0.850877	0.764535
Skap1	1.271	0.345	0.189	4.68758e-09	1.33611e-11	1.99743e-10	1.86882e-11	8.32905	0.507576	0.215385	0.36087	0.241228	0.15407
Ms4a1	-0.141956	0.831	0.862	4.69841e-09	1.62649e-29	0.85303	0.233244	8.32805	0.863636	0.630769	0.930435	0.846491	0.872093
Mtap	1.58087	0.208	0.073	4.74638e-09	3.36496e-09	5.11922e-11	1.41217e-10	8.32364	0.166667	0.153846	0.278261	0.0789474	0.0697674
Cdc42se2	0.67373	0.783	0.601	4.75531e-09	2.98746e-11	2.07211e-14	4.70763e-14	8.32282	0.825758	0.558974	0.917391	0.635965	0.578488
Prpf8	0.453733	0.892	0.764	4.77068e-09	3.36244e-10	1.30831e-11	1.55941e-11	8.32142	0.863636	0.866667	0.9	0.767544	0.761628
Zc3h4	0.638097	0.639	0.421	4.91197e-09	2.82637e-10	2.78884e-12	1.462e-12	8.30874	0.712121	0.553846	0.678261	0.45614	0.398256
Isg20	0.143574	0.743	0.696	4.91769e-09	4.60574e-11	0.0557658	0.152272	8.30824	0.484848	0.846154	0.769565	0.70614	0.688953
Copb1	0.721801	0.684	0.469	5.03888e-09	1.31647e-09	1.54586e-14	5.21614e-14	8.29767	0.765152	0.523077	0.765217	0.552632	0.412791
Hvcn1	0.619065	0.925	0.874	5.09178e-09	2.984e-20	9.26452e-14	9.75982e-14	8.29313	0.909091	0.820513	0.973913	0.899123	0.857558
Inpp4a	1.18304	0.339	0.152	5.11216e-09	1.05459e-09	1.10237e-13	1.05288e-12	8.2914	0.44697	0.179487	0.413043	0.171053	0.139535
Lrrfip1	-0.288516	0.896	0.9	5.27497e-09	1.32027e-11	1.24668e-05	1.04161e-06	8.27778	0.856061	0.861538	0.9	0.907895	0.895349
Sirpb1a	1.61152	0.196	0.068	5.41743e-09	5.40512e-09	1.66787e-10	3.16527e-10	8.26621	0.234848	0.107692	0.247826	0.0789474	0.0610465
Psmc6	-0.417081	0.948	0.984	5.42707e-09	5.22577e-10	2.67046e-17	2.15941e-17	8.26543	0.893939	0.989744	0.904348	0.982456	0.985465
Hk3	0.643922	0.515	0.322	5.44544e-09	2.12684e-12	3.03534e-10	2.92945e-10	8.26397	0.25	0.574359	0.621739	0.385965	0.27907
Clec4g	1.16729	0.321	0.152	5.45899e-09	1.89805e-12	1.49393e-11	8.49551e-11	8.26289	0.295455	0.205128	0.434783	0.135965	0.162791
Xrn2	0.774647	0.654	0.434	5.55378e-09	5.15908e-11	1.09012e-14	3.70275e-14	8.25541	0.780303	0.507692	0.7	0.491228	0.395349
Anxa11	0.813185	0.488	0.292	5.67637e-09	4.16606e-09	4.81707e-12	4.08333e-11	8.24593	0.44697	0.446154	0.547826	0.311404	0.27907
Dok2	0.980123	0.418	0.231	5.70158e-09	1.1405e-10	5.85746e-12	3.89853e-11	8.24401	0.5	0.333333	0.443478	0.328947	0.165698
Mrfap1	-0.340338	0.968	0.986	5.73482e-09	2.86436e-10	2.00973e-12	2.7426e-11	8.24148	0.931818	0.979487	0.96087	0.97807	0.991279
Casp8	-0.35675	0.779	0.806	5.95053e-09	7.33313e-11	4.44537e-06	1.06597e-07	8.22544	0.75	0.8	0.73913	0.842105	0.781977
Ptprb	0.843207	0.478	0.294	5.96414e-09	3.23919e-12	2.39058e-10	7.18595e-10	8.22445	0.590909	0.394872	0.482609	0.298246	0.290698
Ppp1r12a	0.972513	0.469	0.273	5.9645e-09	2.60563e-10	7.23948e-13	2.80148e-12	8.22443	0.651515	0.292308	0.513043	0.342105	0.226744
Sema7a	-0.662671	0.278	0.316	6.0923e-09	2.62461e-12	0.0319217	8.26766e-07	8.21522	0.25	0.215385	0.347826	0.385965	0.270349
Sparc	-0.413572	0.679	0.608	6.15457e-09	1.94791e-27	0.531465	8.27969e-05	8.2108	0.924242	0.497436	0.695652	0.732456	0.526163
Id1	0.805504	0.438	0.25	6.20398e-09	3.06479e-11	1.0723e-10	1.95537e-10	8.20733	0.492424	0.45641	0.391304	0.219298	0.270349
Donson	0.825056	0.406	0.241	6.27557e-09	1.77559e-09	1.94694e-09	1.20508e-08	8.20235	0.393939	0.435897	0.386957	0.254386	0.232558
Itpripl1	-0.640995	0.517	0.614	6.31522e-09	2.03802e-10	6.97662e-08	1.77908e-11	8.19961	0.484848	0.630769	0.43913	0.627193	0.604651
Flot2	0.670606	0.521	0.344	6.37014e-09	6.13111e-10	1.61762e-09	8.32625e-09	8.19585	0.515152	0.502564	0.53913	0.372807	0.325581
Azin1	0.417751	0.731	0.582	6.48463e-09	6.74065e-11	1.95405e-06	5.92469e-07	8.18811	0.659091	0.794872	0.708696	0.614035	0.561047
Lancl1	0.98587	0.4	0.217	6.59607e-09	2.32239e-09	1.60618e-11	6.85884e-11	8.18071	0.439394	0.338462	0.430435	0.223684	0.212209
Znrd1	-0.327504	0.767	0.755	6.63424e-09	1.06838e-09	0.000152361	6.41488e-10	8.17821	0.772727	0.717949	0.786957	0.72807	0.773256
Atp5d	0.361512	0.977	0.956	6.6656e-09	2.13479e-10	3.85024e-12	3.78668e-12	8.17616	0.984848	0.938462	1	0.969298	0.947674
Rtn3	-0.431386	0.892	0.941	6.71355e-09	3.81266e-10	5.12661e-14	5.25632e-13	8.17305	0.795455	0.958974	0.873913	0.929825	0.947674
Irf1	0.770858	0.688	0.497	6.78557e-09	3.50485e-12	1.52047e-13	2.9169e-13	8.16841	0.856061	0.435897	0.786957	0.583333	0.438953
St8sia4	0.928068	0.51	0.323	6.86824e-09	7.36476e-10	2.79684e-12	2.33329e-12	8.16315	0.674242	0.261538	0.626087	0.372807	0.290698
Exoc6	0.708189	0.526	0.323	6.87336e-09	9.16952e-10	2.48203e-11	4.15891e-11	8.16283	0.484848	0.517949	0.556522	0.407895	0.267442
Paqr9	0.109182	0.616	0.533	7.0089e-09	2.38352e-09	0.0505885	0.00769671	8.15435	0.484848	0.728205	0.586957	0.438596	0.59593
Foxn3	-0.461115	0.767	0.82	7.01074e-09	8.66453e-12	3.37103e-09	2.5234e-10	8.15424	0.75	0.815385	0.708696	0.780702	0.84593
Trafd1	-0.272181	0.838	0.799	7.0446e-09	4.53434e-11	0.004783	3.0369e-08	8.15214	0.840909	0.779487	0.856522	0.828947	0.77907
Srebf2	-0.369405	0.824	0.851	7.05077e-09	4.68998e-11	3.16994e-07	2.0088e-08	8.15176	0.795455	0.882051	0.765217	0.894737	0.822674
Entpd1	0.749564	0.589	0.383	7.05757e-09	6.39822e-10	5.90177e-13	4.09698e-12	8.15134	0.530303	0.446154	0.747826	0.438596	0.34593
Pef1	0.914679	0.366	0.203	7.22916e-09	4.62678e-09	5.35171e-10	3.79089e-09	8.14091	0.393939	0.348718	0.365217	0.201754	0.203488
Tmem147	0.589463	0.646	0.462	7.24563e-09	2.66941e-10	1.88973e-09	1.46089e-09	8.13992	0.666667	0.635897	0.643478	0.495614	0.438953
Atg4b	0.941553	0.343	0.187	7.24764e-09	9.7902e-10	2.39637e-09	1.28724e-08	8.1398	0.356061	0.364103	0.317391	0.236842	0.15407
Mcl1	0.480642	0.955	0.953	7.544e-09	2.84729e-14	4.33719e-12	4.01017e-13	8.1224	0.939394	0.871795	1	0.964912	0.944767
Chm	1.28988	0.287	0.133	7.57503e-09	5.01411e-09	6.7227e-11	7.48022e-11	8.12062	0.401515	0.189744	0.304348	0.153509	0.119186
Tmcc2	-0.180641	0.869	0.89	7.62956e-09	5.26343e-31	0.00978664	0.0271051	8.1175	0.681818	0.969231	0.86087	0.807018	0.944767
Igsf6	0.996819	0.348	0.191	7.8028e-09	1.01016e-10	7.91491e-10	3.91939e-09	8.10775	0.356061	0.235897	0.43913	0.192982	0.188953
Ctsk	-1.41445	0.154	0.177	7.9239e-09	8.01535e-22	0.15879	1.65242e-06	8.10106	0.219697	0.117949	0.147826	0.131579	0.206395
Bicd2	1.04356	0.375	0.203	7.94513e-09	2.02065e-09	3.88179e-11	1.21415e-10	8.0999	0.515152	0.292308	0.365217	0.254386	0.168605
Tbc1d10b	-0.411411	0.926	0.96	8.06325e-09	1.47643e-09	6.5302e-12	8.9879e-12	8.09349	0.840909	0.974359	0.895652	0.951754	0.965116
Fmr1	-0.393711	0.935	0.998	8.13838e-09	3.80878e-10	2.6245e-14	1.22969e-18	8.08946	0.901515	0.984615	0.891304	0.995614	1
Hs6st2	1.51342	0.208	0.068	8.29167e-09	7.29966e-10	1.24861e-11	2.11463e-11	8.08136	0.257576	0.0974359	0.273913	0.0701754	0.0668605
Mafb	0.843522	0.438	0.25	8.34931e-09	6.46309e-10	7.05544e-11	1.89803e-10	8.07835	0.424242	0.353846	0.517391	0.267544	0.238372
Arid4b	0.78931	0.612	0.392	8.53912e-09	2.10951e-10	5.16147e-14	1.36629e-13	8.06859	0.765152	0.471795	0.643478	0.429825	0.366279
Gdpd2	0.787642	0.379	0.201	8.54101e-09	3.09188e-10	3.46757e-10	8.40046e-11	8.06849	0.363636	0.394872	0.373913	0.280702	0.148256
Zbtb11	-0.47541	0.697	0.759	8.57206e-09	3.91501e-10	4.32e-08	4.60153e-10	8.06692	0.674242	0.733333	0.665217	0.719298	0.784884
Ndufa9	0.852675	0.53	0.318	8.90303e-09	5.06256e-10	6.24337e-13	1.9651e-12	8.05046	0.575758	0.4	0.613043	0.390351	0.270349
Ms4a6b	1.27538	0.346	0.178	8.90394e-09	3.3506e-11	3.48677e-11	4.27937e-11	8.05042	0.537879	0.164103	0.391304	0.241228	0.136628
Lgals8	0.695946	0.655	0.455	9.07327e-09	4.40369e-10	6.71684e-13	2.9025e-12	8.04224	0.795455	0.476923	0.721739	0.447368	0.459302
Ubr5	1.07956	0.384	0.196	9.15108e-09	2.88126e-09	2.39585e-12	9.34045e-12	8.03853	0.515152	0.235897	0.434783	0.267544	0.148256
Mylk3	0.858632	0.287	0.149	9.41441e-09	1.40515e-09	3.58728e-08	5.3795e-08	8.02621	0.242424	0.312821	0.291304	0.135965	0.156977
Mvb12b	0.707997	0.433	0.26	9.47276e-09	2.5431e-10	7.71594e-09	6.92493e-09	8.02352	0.363636	0.466667	0.443478	0.245614	0.270349
Rras2	0.970047	0.499	0.322	1.00767e-08	8.62953e-12	4.30747e-12	7.39961e-13	7.99668	0.689394	0.261538	0.591304	0.346491	0.305233
Itga1	1.06691	0.352	0.184	1.01528e-08	1.9034e-09	4.85054e-11	2.20264e-10	7.99341	0.469697	0.205128	0.408696	0.241228	0.145349
Hscb	1.24303	0.294	0.115	1.02912e-08	6.18055e-09	1.79038e-13	1.95055e-13	7.98754	0.295455	0.220513	0.356522	0.162281	0.0843023
Kcnn4	0.353158	0.668	0.503	1.03341e-08	6.78883e-10	3.42517e-06	9.02997e-08	7.98573	0.522727	0.733333	0.695652	0.495614	0.508721
Sod1	0.237906	0.993	1	1.04615e-08	1.41345e-13	5.209e-07	3.84239e-08	7.98041	0.992424	0.984615	1	1	1
Peli1	0.736154	0.686	0.502	1.08744e-08	1.2328e-11	3.62803e-12	3.71247e-12	7.96359	0.863636	0.517949	0.717391	0.517544	0.491279
Ttc9c	1.03339	0.372	0.217	1.10109e-08	2.78551e-09	6.41229e-10	1.06364e-10	7.95818	0.44697	0.241026	0.43913	0.22807	0.209302
Zfp36l2	0.544851	0.795	0.626	1.10178e-08	2.72093e-11	2.30254e-12	9.71951e-12	7.9579	0.893939	0.810256	0.726087	0.710526	0.569767
Acp2	0.868413	0.479	0.29	1.10232e-08	1.18404e-09	1.17165e-11	5.90165e-11	7.95769	0.492424	0.389744	0.547826	0.302632	0.281977
Unc50	0.809896	0.504	0.316	1.10989e-08	2.67855e-09	1.81272e-11	1.11486e-10	7.95472	0.537879	0.384615	0.586957	0.311404	0.319767
Pilrb2	0.848513	0.357	0.196	1.11746e-08	1.55749e-09	2.20398e-09	8.12217e-09	7.95177	0.348485	0.333333	0.382609	0.214912	0.18314
Thoc7	-0.478676	0.896	0.977	1.13379e-08	5.65881e-09	1.55308e-18	5.5185e-19	7.94547	0.765152	0.969231	0.86087	0.973684	0.979651
Filip1l	1.09875	0.393	0.203	1.13606e-08	1.78086e-09	5.16378e-13	2.48956e-12	7.9446	0.575758	0.194872	0.456522	0.276316	0.15407
Atxn10	1.11807	0.363	0.184	1.1482e-08	1.69397e-09	4.88541e-12	2.01925e-11	7.93998	0.378788	0.210256	0.482609	0.241228	0.145349
Mmd	0.946041	0.544	0.404	1.17014e-08	4.86238e-17	5.08037e-07	2.44768e-07	7.93176	0.704545	0.415385	0.56087	0.394737	0.409884
Kcnab2	0.877012	0.569	0.362	1.17797e-08	7.78236e-11	5.09343e-13	9.21605e-13	7.92887	0.765152	0.4	0.604348	0.451754	0.302326
Slc43a3	0.250882	0.759	0.626	1.17924e-08	6.49835e-11	0.000189722	6.20599e-06	7.9284	0.628788	0.851282	0.747826	0.627193	0.625
Cdc25b	0.517418	0.551	0.372	1.21823e-08	1.58845e-10	5.90747e-08	8.24926e-09	7.91427	0.515152	0.574359	0.556522	0.355263	0.383721
Myo9b	0.713928	0.675	0.49	1.22482e-08	7.31243e-11	2.4368e-12	4.76953e-12	7.91193	0.780303	0.471795	0.773913	0.530702	0.462209
Hdgf	-0.482323	0.973	0.995	1.25451e-08	4.66634e-09	3.69401e-17	3.14007e-17	7.90153	0.916667	0.994872	0.965217	0.986842	1
Fhod1	0.901318	0.366	0.215	1.25792e-08	2.27744e-09	6.87512e-09	2.30438e-08	7.90035	0.416667	0.307692	0.386957	0.192982	0.229651
Rnh1	-0.293675	0.903	0.902	1.28077e-08	3.58399e-10	2.6072e-06	6.79055e-08	7.89253	0.818182	0.928205	0.873913	0.912281	0.895349
Spag7	0.983412	0.431	0.238	1.29622e-08	4.44603e-09	2.04337e-12	1.0084e-11	7.88732	0.530303	0.282051	0.5	0.324561	0.180233
Pglyrp1	0.336455	0.772	0.689	1.30176e-08	1.63127e-18	0.000854594	0.00155236	7.88547	0.537879	0.810256	0.852174	0.688596	0.688953
Lima1	-0.54836	0.612	0.668	1.32978e-08	4.45693e-11	1.83279e-06	1.00004e-10	7.87622	0.522727	0.610256	0.66087	0.649123	0.680233
Cyth4	-0.18077	0.867	0.888	1.36687e-08	3.61965e-10	0.00633642	0.0140019	7.86427	0.909091	0.712821	0.930435	0.912281	0.872093
Slc35e1	1.20661	0.311	0.135	1.40299e-08	2.23481e-09	1.50428e-12	5.98231e-12	7.85295	0.386364	0.230769	0.334783	0.175439	0.107558
Dlst	0.627428	0.598	0.409	1.41176e-08	1.58124e-09	1.7029e-10	6.91863e-10	7.85024	0.522727	0.620513	0.626087	0.377193	0.430233
Dlg2	1.37091	0.206	0.082	1.42198e-08	2.91626e-09	2.67949e-09	1.15029e-08	7.84711	0.181818	0.210256	0.217391	0.118421	0.0581395
Rasa1	1.03834	0.373	0.206	1.44617e-08	3.1363e-09	1.46867e-10	2.76152e-10	7.83978	0.469697	0.271795	0.404348	0.245614	0.180233
Tbc1d1	0.949364	0.465	0.269	1.46278e-08	2.41948e-09	1.1456e-12	5.49972e-12	7.83482	0.621212	0.338462	0.482609	0.324561	0.232558
Plbd1	-0.397257	0.772	0.792	1.46761e-08	2.25744e-11	3.39577e-05	8.74495e-08	7.83339	0.734848	0.789744	0.773913	0.811404	0.77907
Inpp4b	0.829429	0.675	0.442	1.46935e-08	2.57318e-12	4.18618e-17	4.17586e-16	7.83288	0.818182	0.476923	0.747826	0.460526	0.430233
Ammecr1	0.42775	0.515	0.376	1.47208e-08	1.44256e-10	2.37801e-05	1.1763e-05	7.83207	0.393939	0.692308	0.434783	0.403509	0.357558
Trem2	-2.00383	0.092	0.129	1.48363e-08	2.97462e-26	0.0189468	5.63632e-08	7.82867	0.0909091	0.107692	0.0782609	0.0833333	0.159884
Ccdc82	1.3409	0.268	0.115	1.49282e-08	9.83468e-09	3.66868e-11	8.30384e-11	7.82599	0.393939	0.164103	0.282609	0.175439	0.0755814
Pcmt1	-0.486219	0.908	0.932	1.50974e-08	5.9607e-11	8.9389e-13	1.32273e-13	7.8211	0.848485	0.948718	0.882609	0.899123	0.953488
Tbc1d5	0.971569	0.463	0.24	1.51146e-08	1.39798e-09	7.73291e-15	2.17816e-14	7.8206	0.522727	0.323077	0.547826	0.311404	0.19186
Zbtb20	1.50491	0.228	0.087	1.52285e-08	7.08463e-09	5.81545e-11	1.42749e-10	7.81734	0.181818	0.107692	0.356522	0.100877	0.0784884
Traj13	1.42992	0.284	0.126	1.53519e-08	1.82516e-10	1.54088e-11	2.4966e-11	7.81384	0.454545	0.184615	0.269565	0.144737	0.113372
Relb	0.998512	0.443	0.255	1.53705e-08	1.73232e-09	2.47772e-12	6.69131e-12	7.81331	0.621212	0.276923	0.482609	0.298246	0.226744
Cdo1	3.65839	0.129	0.066	1.56801e-08	5.10717e-49	0.000208365	1.72604e-06	7.80465	0.30303	0.0666667	0.0826087	0.0833333	0.0552326
Tars	0.831887	0.479	0.287	1.638e-08	1.70699e-09	7.62036e-12	6.54921e-11	7.78569	0.5	0.425641	0.513043	0.298246	0.27907
Irak2	0.836704	0.528	0.33	1.64288e-08	4.00303e-10	1.41485e-12	8.62416e-12	7.78439	0.659091	0.369231	0.586957	0.359649	0.311047
Gdf3	0.654267	0.336	0.227	1.66646e-08	3.31581e-10	2.14852e-05	0.000100784	7.77821	0.151515	0.528205	0.278261	0.25	0.212209
Grk2	-0.167355	0.989	0.997	1.70286e-08	2.17554e-11	4.09201e-05	0.000132881	7.76882	0.939394	0.979487	0.991304	1	0.994186
Alox5ap	-0.433117	0.883	0.925	1.76278e-08	7.71741e-14	4.89943e-09	4.37582e-09	7.7538	0.80303	0.907692	0.891304	0.907895	0.936047
Slfn14	0.596925	0.35	0.226	1.76698e-08	2.0622e-09	9.12946e-06	1.78349e-05	7.75277	0.227273	0.358974	0.413043	0.201754	0.241279
Afap1l2	1.52376	0.171	0.063	1.81026e-08	5.55023e-09	1.3913e-08	4.2024e-08	7.74226	0.19697	0.14359	0.178261	0.0614035	0.0639535
Pmpcb	0.624426	0.673	0.465	1.84358e-08	6.4325e-09	1.57662e-12	3.48865e-12	7.73434	0.757576	0.579487	0.708696	0.473684	0.459302
Dnajc7	-0.250344	0.882	0.892	1.8694e-08	6.35662e-10	8.70003e-05	5.14437e-05	7.7283	0.863636	0.892308	0.83913	0.929825	0.866279
Ccni	0.910398	0.47	0.283	1.89284e-08	1.57072e-09	1.2134e-11	4.12627e-11	7.72289	0.484848	0.369231	0.547826	0.311404	0.264535
Tmem109	0.91212	0.447	0.248	1.89597e-08	3.33617e-09	1.00805e-12	8.58847e-12	7.72217	0.575758	0.307692	0.491304	0.223684	0.264535
Rheb	0.764269	0.576	0.362	1.90949e-08	2.87156e-09	1.66387e-13	1.19567e-12	7.71908	0.69697	0.461538	0.608696	0.421053	0.322674
Btg1	0.659664	0.905	0.907	1.92035e-08	1.14815e-28	1.85896e-13	1.62577e-17	7.71662	0.992424	0.738462	0.995652	0.921053	0.898256
B3gnt8	1.46858	0.237	0.093	1.92208e-08	1.22367e-08	3.34414e-11	8.46047e-11	7.71623	0.356061	0.179487	0.217391	0.114035	0.0784884
Itgb7	1.05541	0.456	0.25	2.05104e-08	2.07822e-11	6.3667e-14	3.33413e-13	7.68803	0.568182	0.266667	0.552174	0.311404	0.209302
Ube4a	-0.457506	0.718	0.771	2.06997e-08	4.90214e-09	3.29778e-08	1.24861e-10	7.68404	0.757576	0.758974	0.634783	0.789474	0.758721
Pon3	1.04744	0.381	0.213	2.13224e-08	1.53431e-10	2.46289e-10	5.3293e-10	7.67116	0.340909	0.271795	0.495652	0.201754	0.22093
Cebpg	0.787687	0.494	0.315	2.17178e-08	9.19261e-09	7.76598e-11	4.90597e-10	7.66318	0.583333	0.389744	0.530435	0.302632	0.322674
Bcap31	0.642929	0.743	0.552	2.18258e-08	8.71577e-10	1.06846e-12	1.23385e-12	7.66103	0.901515	0.553846	0.817391	0.561404	0.546512
Star	0.889399	0.409	0.257	2.22351e-08	1.04712e-11	9.42872e-09	2.26576e-08	7.65296	0.5	0.292308	0.456522	0.263158	0.252907
E2f6	0.945228	0.303	0.171	2.26728e-08	1.08125e-08	8.73339e-08	2.22448e-07	7.64449	0.318182	0.338462	0.265217	0.210526	0.145349
Taf7	0.835604	0.402	0.233	2.29363e-08	1.29903e-08	5.28882e-10	4.18546e-09	7.63948	0.424242	0.471795	0.330435	0.280702	0.200581
Mapkapk3	0.71957	0.555	0.343	2.31836e-08	1.55946e-09	2.70599e-12	5.20731e-12	7.63482	0.583333	0.482051	0.604348	0.342105	0.343023
Arfgef1	0.78012	0.573	0.339	2.33719e-08	3.12638e-09	1.72976e-13	2.46797e-14	7.63131	0.674242	0.451282	0.617391	0.442982	0.270349
Epn1	-0.419279	0.941	0.984	2.33958e-08	1.0216e-09	2.05612e-14	1.14323e-13	7.63086	0.848485	0.984615	0.913043	0.97807	0.988372
Mapk1ip1l	0.683445	0.661	0.441	2.41104e-08	1.03802e-09	6.35431e-13	3.5204e-13	7.6178	0.742424	0.569231	0.686957	0.5	0.401163
Dcun1d1	0.527829	0.727	0.561	2.46209e-08	9.10074e-10	2.06168e-09	3.045e-09	7.6087	0.772727	0.666667	0.743478	0.574561	0.552326
Rgp1	0.798921	0.458	0.278	2.47128e-08	9.47471e-09	9.78205e-11	9.15083e-10	7.60708	0.492424	0.451282	0.443478	0.346491	0.232558
Cpm	1.29155	0.275	0.143	2.47149e-08	1.46603e-08	5.98476e-09	9.4817e-12	7.60704	0.507576	0.148718	0.247826	0.149123	0.139535
Galnt1	-0.368966	0.978	0.993	2.50135e-08	1.93058e-09	1.26106e-15	4.13181e-15	7.60183	0.924242	0.984615	0.973913	0.982456	1
Ppm1e	1.20107	0.241	0.108	2.6426e-08	2.63889e-08	3.1788e-09	1.37829e-08	7.57797	0.318182	0.276923	0.165217	0.118421	0.101744
Tmod1	0.198118	0.461	0.404	2.76376e-08	2.77294e-10	0.0544213	0.146899	7.5585	0.234848	0.697436	0.391304	0.337719	0.447674
Adgrl3	1.36925	0.241	0.087	2.81215e-08	4.63086e-09	5.26021e-12	9.92417e-12	7.55096	0.325758	0.174359	0.247826	0.140351	0.0523256
Slc3a2	0.434565	0.797	0.65	2.83853e-08	1.33055e-10	1.50684e-06	9.19396e-08	7.54691	0.712121	0.769231	0.852174	0.627193	0.665698
Gucy1b1	1.44496	0.183	0.068	2.83894e-08	1.79766e-08	4.71829e-09	2.06232e-08	7.54684	0.25	0.112821	0.204348	0.0745614	0.0639535
Cast	0.483414	0.761	0.593	2.85494e-08	5.87659e-09	9.2372e-10	1.05934e-09	7.5444	0.795455	0.779487	0.717391	0.565789	0.610465
Hagh	0.239277	0.56	0.449	2.85769e-08	3.75212e-11	0.00357573	0.000385118	7.54398	0.454545	0.728205	0.478261	0.399123	0.482558
Aim2	0.973798	0.411	0.233	2.86384e-08	1.72309e-08	2.55545e-11	9.22417e-11	7.54305	0.469697	0.302564	0.469565	0.298246	0.188953
Wars	0.914887	0.438	0.238	2.86597e-08	1.37873e-09	3.18333e-12	7.31973e-12	7.54273	0.454545	0.384615	0.473913	0.267544	0.218023
Mthfd1	0.660533	0.415	0.273	2.90721e-08	5.82998e-09	3.50247e-07	2.10643e-06	7.53652	0.257576	0.487179	0.443478	0.298246	0.255814
Stx11	0.365476	0.767	0.652	2.92077e-08	8.798e-11	1.9975e-05	2.88091e-05	7.5345	0.598485	0.815385	0.791304	0.640351	0.659884
Efhd2	-0.220905	0.939	0.925	2.93884e-08	3.58502e-10	0.00311235	0.000189589	7.53182	0.886364	0.902564	0.96087	0.942982	0.912791
Creb3	-0.406985	0.724	0.773	2.95662e-08	1.36836e-09	4.43845e-07	7.72835e-09	7.5292	0.69697	0.769231	0.678261	0.75	0.787791
Il9r	1.33379	0.273	0.133	2.97743e-08	5.28793e-10	1.082e-09	3.01141e-10	7.52616	0.219697	0.153846	0.404348	0.153509	0.119186
Zmiz1	0.840549	0.535	0.322	2.99411e-08	1.10134e-09	7.18784e-13	1.56412e-12	7.52373	0.689394	0.358974	0.595652	0.328947	0.31686
Dnmt1	0.467589	0.736	0.565	3.02868e-08	5.87493e-10	2.54619e-09	3.49785e-09	7.51875	0.659091	0.723077	0.773913	0.508772	0.601744
Mars	-0.496512	0.853	0.946	3.05945e-08	6.54076e-09	3.9989e-15	9.00126e-15	7.51436	0.80303	0.974359	0.734783	0.929825	0.956395
Slc16a10	0.169505	0.68	0.58	3.0694e-08	2.16725e-10	0.0182984	0.00114802	7.51295	0.545455	0.789744	0.647826	0.508772	0.627907
Glod4	0.686865	0.517	0.339	3.07673e-08	1.76365e-08	8.34152e-10	4.76575e-09	7.51191	0.537879	0.466667	0.547826	0.346491	0.334302
Dgat2	2.55619	0.16	0.1	3.08549e-08	1.21905e-31	0.00155236	2.57909e-05	7.51068	0.265152	0.138462	0.117391	0.109649	0.0930233
H2afv	-0.418001	0.867	0.921	3.0957e-08	1.6914e-09	1.34605e-10	4.89714e-10	7.50924	0.795455	0.912821	0.830435	0.899123	0.936047
Pbxip1	0.887746	0.474	0.287	3.10336e-08	3.0347e-09	1.69948e-11	5.97715e-11	7.50817	0.545455	0.328205	0.556522	0.311404	0.270349
Capn5	0.910014	0.266	0.145	3.14526e-08	3.13162e-08	4.03794e-07	2.25761e-06	7.50234	0.19697	0.282051	0.291304	0.140351	0.148256
Ndufc2	-0.386791	0.869	0.951	3.17235e-08	6.98622e-10	1.41071e-09	3.3189e-10	7.49862	0.810606	0.938462	0.821739	0.947368	0.953488
Yipf3	0.804492	0.51	0.339	3.18988e-08	1.15023e-09	2.44419e-10	5.04113e-10	7.49623	0.560606	0.446154	0.534783	0.372807	0.31686
Mpzl1	1.40845	0.206	0.08	3.20941e-08	6.52913e-09	1.28868e-09	5.66829e-09	7.49357	0.219697	0.14359	0.252174	0.0964912	0.0697674
Cnbp	0.249856	0.995	0.998	3.24803e-08	1.47983e-12	3.15676e-10	5.4604e-11	7.48838	0.984848	0.989744	0.995652	0.995614	1
Lamtor3	-0.484672	0.679	0.755	3.2604e-08	2.50817e-09	1.57274e-08	6.02835e-10	7.48673	0.674242	0.784615	0.578261	0.780702	0.738372
Ndufa12	-0.539711	0.689	0.781	3.28976e-08	9.00581e-10	9.55965e-12	1.63315e-12	7.48284	0.515152	0.851282	0.630435	0.767544	0.790698
Tnfaip2	-0.64581	0.851	0.869	3.29314e-08	8.75978e-16	4.37142e-12	9.53946e-16	7.48239	0.598485	0.917949	0.9	0.77193	0.93314
Pea15a	1.0581	0.384	0.199	3.31626e-08	1.00075e-08	5.82473e-12	2.36459e-11	7.47935	0.5	0.225641	0.452174	0.223684	0.18314
2007-03-01	0.841769	0.533	0.313	3.33941e-08	5.5577e-09	9.47731e-14	3.06909e-13	7.47633	0.689394	0.384615	0.569565	0.364035	0.27907
Txk	1.0455	0.431	0.26	3.34222e-08	3.89232e-11	8.32686e-11	5.60662e-11	7.47596	0.621212	0.297436	0.434783	0.298246	0.235465
Txn2	0.436985	0.883	0.741	3.36345e-08	3.04129e-10	4.08849e-10	5.52938e-11	7.47322	0.886364	0.861538	0.882609	0.75	0.735465
Pheta2	0.10743	0.566	0.561	3.40481e-08	1.72336e-13	0.917562	0.919781	7.46791	0.310606	0.861538	0.447826	0.491228	0.607558
Ddx54	1.14387	0.329	0.17	3.50086e-08	1.44248e-08	1.68353e-10	2.33611e-10	7.45582	0.393939	0.225641	0.378261	0.223684	0.133721
Pdia2	1.94523	0.145	0.091	3.58144e-08	9.29768e-17	0.00437109	0.00964743	7.44594	0.0909091	0.246154	0.0913043	0.0701754	0.104651
Cpxm1	-0.495278	0.329	0.355	3.6666e-08	1.27826e-12	0.067181	0.000112072	7.43574	0.340909	0.235897	0.4	0.381579	0.337209
Tm7sf3	0.572927	0.456	0.302	3.68695e-08	2.55938e-11	4.34998e-07	6.25993e-07	7.43333	0.265152	0.615385	0.430435	0.219298	0.357558
Prkd2	-0.137285	0.89	0.914	3.73052e-08	1.91391e-10	0.00749224	0.0227256	7.42823	0.893939	0.835897	0.886957	0.921053	0.909884
Ndufb5	0.555086	0.831	0.64	3.76011e-08	1.26765e-08	1.08921e-12	6.66989e-14	7.4248	0.916667	0.707692	0.891304	0.684211	0.610465
Zfp207	-0.428825	0.777	0.794	3.80041e-08	2.41073e-09	1.27294e-07	4.29521e-12	7.42017	0.825758	0.805128	0.691304	0.833333	0.767442
Ncoa2	1.14862	0.318	0.157	3.81676e-08	1.86711e-08	5.56411e-11	1.555e-10	7.41831	0.431818	0.179487	0.369565	0.210526	0.122093
2001-09-01	-0.209207	0.838	0.876	3.93531e-08	3.63931e-11	0.000374519	0.00303098	7.40502	0.848485	0.8	0.821739	0.907895	0.854651
Ccdc92b	0.76182	0.278	0.173	3.95012e-08	8.24609e-10	1.74101e-05	8.43746e-05	7.40339	0.25	0.323077	0.256522	0.157895	0.18314
Ipo8	1.14525	0.327	0.163	4.15521e-08	5.34395e-09	4.63101e-11	1.87441e-10	7.38141	0.424242	0.241026	0.343478	0.201754	0.136628
Hipk1	0.230661	0.887	0.808	4.23893e-08	8.50081e-09	0.000282833	0.000284772	7.37274	0.840909	0.907692	0.873913	0.789474	0.819767
Lrrc8b	1.24115	0.19	0.086	4.26055e-08	2.71721e-08	2.51428e-07	6.92389e-07	7.37053	0.121212	0.266667	0.165217	0.0877193	0.0843023
St8sia6	1.0843	0.379	0.187	4.28606e-08	1.38088e-08	5.89906e-13	3.44027e-12	7.36794	0.44697	0.261538	0.43913	0.245614	0.148256
Mcfd2	0.793225	0.492	0.308	4.29065e-08	6.01036e-10	1.41102e-10	6.36672e-10	7.36748	0.55303	0.389744	0.543478	0.333333	0.290698
Gclc	0.500444	0.58	0.407	4.29827e-08	2.85533e-10	7.16691e-08	4.53169e-08	7.36671	0.568182	0.615385	0.556522	0.390351	0.418605
Clec4n	0.805845	0.438	0.271	4.30927e-08	4.19913e-10	2.1468e-09	1.19418e-08	7.3656	0.371212	0.358974	0.543478	0.298246	0.252907
Dab2ip	1.24674	0.248	0.11	4.37195e-08	7.08501e-09	1.32577e-09	5.83706e-09	7.35932	0.363636	0.158974	0.256522	0.131579	0.0959302
Slamf7	0.903606	0.513	0.315	4.44035e-08	2.36277e-10	1.17586e-12	4.60437e-12	7.35258	0.515152	0.261538	0.726087	0.315789	0.313953
Anapc5	-0.407089	0.978	0.995	4.75047e-08	1.16997e-09	2.76794e-16	1.39058e-15	7.32326	0.916667	0.989744	0.969565	0.995614	0.994186
Map3k5	0.792841	0.539	0.329	4.75492e-08	4.02162e-09	5.78339e-13	3.67034e-12	7.32286	0.69697	0.461538	0.513043	0.399123	0.281977
Dcxr	-0.549412	0.562	0.671	4.96013e-08	5.56392e-10	3.39595e-08	1.22103e-08	7.30451	0.378788	0.692308	0.556522	0.657895	0.680233
Safb2	-0.265792	0.943	0.944	5.00384e-08	3.56206e-09	5.66843e-06	4.6064e-06	7.3007	0.924242	0.948718	0.913043	0.964912	0.930233
Col5a2	-0.955613	0.316	0.26	5.05718e-08	6.63178e-25	0.240707	1.58256e-09	7.29609	0.484848	0.241026	0.282609	0.236842	0.276163
Shc1	0.573274	0.643	0.423	5.07888e-08	4.96712e-09	2.83569e-11	9.19595e-13	7.29423	0.666667	0.620513	0.647826	0.434211	0.415698
Ubqln2	0.819376	0.522	0.316	5.08319e-08	3.55324e-08	9.86277e-13	6.02365e-12	7.29386	0.621212	0.394872	0.573913	0.381579	0.273256
Siglece	0.997233	0.251	0.117	5.1889e-08	3.11251e-09	1.07648e-08	1.81515e-08	7.28492	0.159091	0.220513	0.330435	0.153509	0.0930233
BC005537	0.318905	0.977	0.963	5.24007e-08	1.24201e-09	2.60428e-11	2.776e-11	7.28066	0.977273	0.938462	0.995652	0.964912	0.962209
Ccr7	1.06861	0.472	0.274	5.27773e-08	1.07968e-13	5.8996e-13	1.62567e-12	7.27755	0.780303	0.276923	0.46087	0.324561	0.241279
Sod2	-0.426294	0.919	0.981	5.32573e-08	4.35655e-09	1.77575e-14	8.09659e-15	7.27362	0.871212	0.984615	0.878261	0.969298	0.988372
Nfe2l2	-0.345846	0.919	0.928	5.3283e-08	3.89536e-09	3.87443e-09	5.55978e-10	7.27341	0.856061	0.948718	0.882609	0.929825	0.927326
Mllt3	0.859572	0.325	0.199	5.38572e-08	1.5096e-08	5.19357e-07	7.66614e-07	7.26876	0.333333	0.307692	0.334783	0.22807	0.180233
Glo1	0.709916	0.357	0.231	5.43566e-08	8.11281e-09	1.84738e-06	9.11296e-06	7.26475	0.325758	0.415385	0.326087	0.219298	0.238372
Tmem248	0.769849	0.585	0.346	5.48055e-08	2.41741e-09	1.78618e-14	5.91387e-15	7.26118	0.659091	0.507692	0.608696	0.429825	0.290698
Ubash3b	1.29511	0.262	0.107	5.66939e-08	6.02281e-09	2.00859e-11	7.50795e-11	7.24646	0.310606	0.184615	0.3	0.157895	0.0726744
Cdk9	-0.374633	0.91	0.937	5.67807e-08	2.90045e-09	1.51672e-09	7.20427e-10	7.2458	0.840909	0.948718	0.882609	0.916667	0.950581
Phkg2	-0.511968	0.627	0.734	5.68495e-08	8.21984e-10	1.06709e-09	1.39957e-09	7.24527	0.590909	0.733333	0.530435	0.780702	0.703488
Epdr1	0.73968	0.298	0.177	5.78682e-08	2.85686e-08	2.28115e-06	8.76213e-06	7.23756	0.219697	0.348718	0.3	0.184211	0.171512
Eif4a2	0.585933	0.79	0.614	6.00958e-08	4.71373e-09	2.49914e-11	8.13533e-12	7.22116	0.909091	0.641026	0.834783	0.640351	0.59593
Siglecg	0.901437	0.555	0.339	6.08082e-08	1.37726e-11	1.01656e-13	2.95683e-13	7.21604	0.772727	0.374359	0.582609	0.412281	0.290698
Mtor	-0.384068	0.847	0.883	6.08606e-08	2.18318e-09	2.52775e-08	4.99619e-09	7.21566	0.833333	0.892308	0.782609	0.864035	0.895349
Hcst	0.850534	0.553	0.365	6.24638e-08	1.46814e-10	4.18245e-12	1.37704e-11	7.20437	0.659091	0.476923	0.556522	0.403509	0.340116
Pitpna	-0.186919	0.959	0.962	6.34949e-08	2.19845e-09	0.000374854	0.00213425	7.19726	0.924242	0.94359	0.96087	0.964912	0.959302
Mrvi1	0.554017	0.472	0.336	6.44488e-08	1.08228e-15	1.06831e-05	1.72753e-05	7.19079	0.416667	0.502564	0.478261	0.434211	0.270349
Ms4a3	0.904586	0.226	0.14	6.57031e-08	2.3881e-10	0.000119291	0.000219878	7.18241	0.113636	0.348718	0.186957	0.157895	0.127907
Napa	0.506454	0.718	0.535	6.6952e-08	1.1786e-08	3.4953e-09	7.77312e-10	7.17424	0.742424	0.687179	0.721739	0.530702	0.537791
Dhx40	0.79299	0.494	0.299	6.72646e-08	2.00725e-08	3.10191e-11	1.13333e-10	7.17221	0.575758	0.425641	0.504348	0.364035	0.255814
Idh3a	0.714581	0.544	0.35	6.75297e-08	4.40796e-09	1.42154e-11	1.42934e-10	7.1705	0.575758	0.507692	0.56087	0.421053	0.302326
Tmem94	0.953946	0.352	0.206	6.76485e-08	5.41989e-08	9.02159e-09	6.34326e-09	7.16974	0.416667	0.261538	0.391304	0.20614	0.206395
Nfatc3	0.652565	0.691	0.505	6.79095e-08	1.39698e-08	7.02545e-13	5.25751e-12	7.16807	0.80303	0.533333	0.747826	0.517544	0.497093
Ascc2	0.861068	0.404	0.227	6.92672e-08	6.90627e-08	1.76531e-10	9.6988e-10	7.15947	0.431818	0.323077	0.456522	0.219298	0.232558
Pqlc2	-0.517323	0.411	0.484	7.10368e-08	3.27375e-09	0.000265608	2.18226e-06	7.14852	0.515152	0.379487	0.382609	0.504386	0.47093
Supt20	-0.293506	0.953	0.974	7.20027e-08	7.49829e-10	5.32016e-08	1.58598e-07	7.14265	0.901515	0.974359	0.921739	0.982456	0.968023
Ate1	0.834407	0.465	0.288	7.24851e-08	8.91446e-09	2.05792e-10	9.1815e-10	7.13975	0.507576	0.358974	0.530435	0.385965	0.223837
Vps13d	0.928592	0.408	0.215	7.28774e-08	3.61281e-08	4.66548e-12	1.83576e-11	7.13741	0.55303	0.307692	0.408696	0.214912	0.215116
Immt	0.649842	0.605	0.432	7.35236e-08	5.97118e-09	1.65814e-10	1.14696e-09	7.13357	0.636364	0.579487	0.613043	0.434211	0.430233
Dyrk2	0.992534	0.4	0.222	7.39669e-08	1.3436e-08	2.06977e-11	1.12088e-10	7.13096	0.613636	0.323077	0.343478	0.201754	0.235465
Ino80e	-0.411098	0.847	0.928	7.48764e-08	2.43735e-09	5.10004e-12	1.44218e-11	7.12566	0.772727	0.938462	0.765217	0.934211	0.924419
Hsd17b12	0.760674	0.583	0.364	7.49994e-08	1.70946e-09	5.90644e-13	6.93557e-13	7.12494	0.727273	0.420513	0.63913	0.460526	0.299419
Agfg1	0.840892	0.456	0.287	7.57434e-08	1.0703e-08	1.52764e-09	3.17868e-09	7.12066	0.545455	0.415385	0.43913	0.324561	0.261628
Trib2	0.859282	0.551	0.344	7.5899e-08	2.73343e-11	4.71276e-12	5.37642e-12	7.11976	0.712121	0.379487	0.604348	0.355263	0.337209
Iffo1	0.866571	0.451	0.259	7.77947e-08	1.62211e-08	3.86379e-11	9.46621e-11	7.10905	0.469697	0.317949	0.552174	0.263158	0.255814
Morc2a	-0.497244	0.636	0.733	8.11011e-08	7.38156e-09	2.07361e-09	5.45571e-10	7.09097	0.606061	0.769231	0.513043	0.745614	0.723837
Appl2	1.16106	0.332	0.152	8.11262e-08	4.60451e-08	1.33549e-12	7.77731e-12	7.09084	0.439394	0.189744	0.391304	0.157895	0.148256
Arhgap30	0.742819	0.655	0.47	8.14183e-08	4.08401e-10	2.08763e-12	5.54572e-12	7.08928	0.712121	0.425641	0.813043	0.517544	0.438953
Prkca	1.13683	0.289	0.136	8.33424e-08	3.78375e-08	2.71526e-10	1.46735e-09	7.07913	0.295455	0.205128	0.356522	0.171053	0.113372
Emc4	1.25537	0.268	0.117	8.3621e-08	5.78952e-08	1.12371e-10	5.05431e-10	7.07768	0.333333	0.14359	0.334783	0.127193	0.110465
Cops8	0.700169	0.535	0.337	8.42524e-08	3.58484e-08	6.93672e-11	1.41129e-10	7.07442	0.643939	0.435897	0.56087	0.451754	0.261628
Zfp68	0.884532	0.431	0.233	8.50749e-08	3.42561e-08	3.39177e-12	9.76169e-12	7.0702	0.522727	0.374359	0.426087	0.254386	0.218023
Dctn1	1.00015	0.352	0.198	8.63066e-08	4.27121e-08	8.99371e-10	1.25497e-09	7.06396	0.401515	0.282051	0.382609	0.232456	0.174419
Ctu2	0.88258	0.411	0.231	8.67117e-08	2.4751e-08	6.06432e-11	4.10883e-10	7.06192	0.492424	0.34359	0.421739	0.298246	0.186047
Alb	2.9344	0.162	0.086	8.72071e-08	5.93176e-138	0.000168048	0.000453792	7.05945	0.174242	0.138462	0.173913	0.0570175	0.104651
Rab3gap2	0.635705	0.637	0.42	8.77571e-08	1.13137e-08	9.4875e-12	1.6847e-12	7.05672	0.590909	0.594872	0.7	0.447368	0.401163
Orai1	-0.427925	0.689	0.743	8.84339e-08	2.80218e-10	1.90719e-06	5.97669e-08	7.05338	0.719697	0.707692	0.63913	0.763158	0.729651
Pxdc1	-0.280156	0.573	0.577	9.22134e-08	1.35103e-13	0.103572	0.00266715	7.03521	0.734848	0.446154	0.569565	0.605263	0.55814
Lacc1	-0.600832	0.393	0.474	9.22739e-08	1.28784e-09	0.000102819	1.85775e-07	7.03492	0.378788	0.45641	0.347826	0.513158	0.447674
Stk38	-0.256365	0.952	0.981	9.25614e-08	3.70425e-10	3.74291e-08	4.09386e-07	7.03357	0.939394	0.938462	0.934783	0.97807	0.982558
Arap2	0.989758	0.397	0.205	9.33949e-08	3.83705e-08	1.4475e-12	1.00065e-11	7.02968	0.537879	0.317949	0.382609	0.245614	0.177326
Dok3	-0.314901	0.822	0.813	9.63485e-08	2.95868e-12	0.0005281	7.669e-07	7.01616	0.757576	0.815385	0.826087	0.877193	0.770349
Gas6	-0.60705	0.44	0.4	9.73783e-08	1.47387e-19	0.987407	8.13383e-07	7.01154	0.659091	0.25641	0.473913	0.429825	0.380814
Esam	1.1823	0.264	0.117	9.80671e-08	2.29931e-08	3.6585e-10	1.72954e-09	7.00848	0.333333	0.164103	0.308696	0.127193	0.110465
Cyb561d1	1.20023	0.268	0.122	9.82784e-08	5.07686e-08	4.71744e-10	2.29182e-09	7.00754	0.348485	0.230769	0.252174	0.149123	0.104651
Inpp5b	0.711331	0.499	0.318	9.91452e-08	2.01646e-08	3.65181e-10	2.53012e-09	7.00373	0.522727	0.4	0.569565	0.355263	0.293605
Paip1	0.833177	0.474	0.292	1.02664e-07	6.43263e-08	4.79356e-11	2.71575e-10	6.98858	0.575758	0.384615	0.491304	0.394737	0.223837
Ankrd10	-0.268033	0.781	0.818	1.0365e-07	7.24789e-09	0.00047477	0.000473171	6.98443	0.795455	0.779487	0.743478	0.850877	0.796512
Traj15	1.1823	0.377	0.178	1.0528e-07	1.48981e-10	1.08681e-13	4.06159e-13	6.97765	0.515152	0.205128	0.443478	0.192982	0.168605
Aamp	0.526518	0.795	0.631	1.05906e-07	3.11159e-08	7.60268e-11	7.0739e-11	6.97508	0.863636	0.661538	0.856522	0.605263	0.648256
Riok3	0.444034	0.795	0.642	1.08057e-07	3.66248e-09	1.38118e-08	7.03988e-09	6.96635	0.810606	0.764103	0.795652	0.662281	0.627907
Sec61b	0.593458	0.767	0.573	1.0866e-07	3.72098e-09	6.42362e-13	9.12789e-13	6.96393	0.719697	0.671795	0.856522	0.605263	0.552326
Hivep2	1.10035	0.368	0.201	1.10587e-07	1.02004e-08	5.35137e-11	7.86925e-11	6.95629	0.55303	0.179487	0.421739	0.22807	0.18314
Cept1	-0.233845	0.889	0.892	1.11453e-07	4.65186e-09	0.00029542	7.1606e-05	6.95291	0.901515	0.846154	0.878261	0.899123	0.886628
B4galt5	-0.367329	0.542	0.568	1.14775e-07	9.70974e-10	0.00399407	2.9582e-06	6.94015	0.712121	0.476923	0.495652	0.578947	0.561047
Cd300lf	0.542569	0.695	0.476	1.14786e-07	1.67723e-09	1.21039e-10	5.26576e-13	6.94011	0.545455	0.697436	0.769565	0.517544	0.447674
Shtn1	-0.600563	0.305	0.365	1.16395e-07	1.48909e-09	0.00398379	9.52908e-06	6.93407	0.348485	0.297436	0.286957	0.425439	0.325581
Zfp869	1.22403	0.302	0.128	1.17282e-07	6.70576e-08	1.31114e-12	5.22934e-12	6.93077	0.431818	0.179487	0.330435	0.166667	0.101744
Tbl1xr1	0.86121	0.49	0.297	1.1959e-07	2.24007e-08	4.06066e-12	2.54707e-11	6.92231	0.575758	0.358974	0.552174	0.368421	0.25
Nus1	0.905312	0.442	0.255	1.19893e-07	7.72722e-08	1.2017e-11	7.28399e-11	6.9212	0.606061	0.246154	0.513043	0.328947	0.206395
Arl8b	0.598296	0.759	0.503	1.20423e-07	5.87677e-09	6.3582e-15	3.07864e-18	6.91929	0.80303	0.641026	0.817391	0.565789	0.462209
Kcmf1	0.695912	0.623	0.413	1.20664e-07	8.73528e-09	3.67167e-13	2.50951e-12	6.91842	0.719697	0.461538	0.704348	0.482456	0.366279
Atxn2	1.46535	0.189	0.073	1.20914e-07	8.56467e-08	6.78867e-09	1.407e-08	6.91752	0.204545	0.158974	0.204348	0.0789474	0.0697674
Parp9	0.739149	0.535	0.351	1.21375e-07	4.58681e-09	9.92857e-11	5.62294e-10	6.91587	0.636364	0.466667	0.534783	0.385965	0.328488
Ccr6	-0.315121	0.555	0.53	1.21631e-07	5.57816e-16	0.512972	0.000327583	6.91495	0.583333	0.4	0.665217	0.583333	0.494186
Gpx3	-0.575986	0.752	0.738	1.21875e-07	7.17105e-38	0.00775952	2.62759e-06	6.91409	0.818182	0.8	0.682609	0.789474	0.703488
Dock11	0.806019	0.564	0.339	1.22222e-07	1.3527e-08	2.00324e-14	1.19149e-13	6.91285	0.674242	0.353846	0.678261	0.421053	0.284884
Mgst1	1.19188	0.366	0.217	1.2329e-07	4.18856e-16	8.69764e-08	1.16627e-07	6.90907	0.371212	0.353846	0.373913	0.245614	0.197674
Bex3	-0.506689	0.871	0.93	1.25218e-07	1.13671e-08	1.26741e-14	6.2882e-14	6.90233	0.689394	0.974359	0.843478	0.912281	0.94186
Faf2	0.929813	0.368	0.212	1.25658e-07	1.25095e-07	1.74495e-09	4.86402e-09	6.90081	0.44697	0.287179	0.391304	0.245614	0.188953
Tram2	1.37876	0.23	0.096	1.26401e-07	5.30021e-08	7.04834e-10	1.75589e-09	6.89825	0.234848	0.0871795	0.347826	0.122807	0.0784884
Dop1b	0.985008	0.339	0.17	1.2654e-07	2.50424e-08	8.46831e-11	3.46919e-10	6.89777	0.340909	0.292308	0.378261	0.162281	0.174419
Ddx58	1.00293	0.408	0.21	1.26841e-07	7.71888e-08	4.48789e-13	3.02723e-12	6.89674	0.583333	0.230769	0.456522	0.267544	0.171512
Nufip2	0.632773	0.702	0.505	1.27073e-07	1.18857e-08	7.49637e-12	8.00023e-12	6.89595	0.810606	0.538462	0.773913	0.548246	0.476744
Rab43	-0.406675	0.801	0.83	1.2796e-07	1.18907e-08	6.19631e-08	2.27695e-10	6.89293	0.742424	0.876923	0.730435	0.842105	0.822674
Tmem123	0.591146	0.822	0.675	1.28393e-07	2.70642e-09	1.62653e-12	5.94127e-12	6.89146	0.893939	0.651282	0.904348	0.684211	0.668605
Itpr3	-0.208985	0.628	0.614	1.2905e-07	6.20007e-10	0.133292	0.000449882	6.88924	0.787879	0.492308	0.634783	0.635965	0.598837
Akirin2	0.647619	0.655	0.465	1.29846e-07	4.68514e-09	4.94394e-11	1.04642e-10	6.88657	0.727273	0.538462	0.717391	0.464912	0.465116
Ezh1	1.34153	0.23	0.096	1.30165e-07	5.56743e-08	9.30195e-10	3.53181e-09	6.8855	0.242424	0.184615	0.26087	0.118421	0.0813953
Tlx1	1.22504	0.242	0.112	1.31061e-07	1.14929e-08	6.65027e-09	2.71741e-08	6.88253	0.30303	0.174359	0.265217	0.153509	0.0843023
Cpne1	0.896585	0.431	0.25	1.33619e-07	3.34631e-08	5.44082e-11	3.0537e-10	6.87413	0.537879	0.287179	0.491304	0.29386	0.22093
Prdx3	-0.585835	0.679	0.836	1.34906e-07	1.5649e-07	1.77056e-16	5.32296e-15	6.86997	0.55303	0.897436	0.547826	0.820175	0.84593
Dync1li1	1.0317	0.338	0.17	1.35059e-07	1.34928e-07	7.60954e-11	4.19296e-10	6.86948	0.371212	0.266667	0.378261	0.214912	0.139535
Rtf2	-0.356836	0.948	0.949	1.39712e-07	2.06416e-09	8.66836e-09	3.35511e-09	6.85477	0.893939	0.984615	0.921739	0.912281	0.973837
Gm14085	1.70367	0.206	0.094	1.41356e-07	2.65393e-12	4.19927e-08	3.2639e-09	6.84969	0.492424	0.148718	0.0913043	0.131579	0.0697674
Slmap	0.772021	0.512	0.313	1.44636e-07	7.14304e-09	1.93209e-11	6.12575e-11	6.83972	0.659091	0.420513	0.508696	0.333333	0.299419
2010315B03Rik	1.15952	0.302	0.145	1.44988e-07	1.07157e-07	1.55404e-10	5.89126e-10	6.83867	0.280303	0.230769	0.373913	0.166667	0.130814
Itga9	1.04488	0.309	0.157	1.45468e-07	1.83255e-08	1.36406e-09	7.1929e-09	6.83723	0.356061	0.2	0.373913	0.184211	0.139535
Ctnnbip1	-0.81057	0.259	0.371	1.46487e-07	4.44586e-09	4.41518e-06	2.52196e-07	6.8342	0.219697	0.328205	0.221739	0.403509	0.348837
Abca1	-0.376117	0.636	0.638	1.47935e-07	2.31077e-10	0.0118194	7.18168e-07	6.82993	0.757576	0.584615	0.6	0.662281	0.622093
Kansl2	-0.378507	0.803	0.853	1.4867e-07	1.24238e-08	3.06068e-08	2.40772e-08	6.82778	0.787879	0.861538	0.734783	0.877193	0.837209
Klf11	0.694383	0.298	0.184	1.48805e-07	4.7415e-08	6.92254e-06	3.72194e-05	6.82738	0.310606	0.384615	0.217391	0.197368	0.174419
Micall2	0.322434	0.479	0.381	1.50559e-07	1.91582e-08	0.00107699	0.00382771	6.82229	0.318182	0.682051	0.4	0.355263	0.398256
Nxpe2	0.162379	0.625	0.54	1.50654e-07	4.40111e-09	0.0478819	0.00881673	6.82202	0.409091	0.789744	0.604348	0.491228	0.572674
Cep70	0.588367	0.409	0.28	1.51777e-07	6.0773e-08	2.50324e-06	1.84729e-05	6.81879	0.371212	0.471795	0.378261	0.276316	0.281977
H2-T22	0.991032	0.424	0.233	1.53111e-07	6.50762e-09	5.41001e-12	2.14123e-11	6.81499	0.583333	0.205128	0.517391	0.302632	0.186047
Klhdc2	0.800587	0.413	0.243	1.55145e-07	2.60281e-08	1.91158e-09	7.43917e-09	6.80926	0.439394	0.379487	0.426087	0.267544	0.226744
Hdac5	1.33642	0.221	0.093	1.55704e-07	4.48017e-08	2.2058e-09	8.17426e-09	6.8077	0.242424	0.0923077	0.317391	0.100877	0.0872093
Cdipt	0.872328	0.452	0.264	1.56944e-07	1.49569e-08	3.47101e-11	1.52556e-10	6.80426	0.530303	0.328205	0.513043	0.267544	0.261628
Zbtb33	1.2634	0.26	0.117	1.61452e-07	8.10205e-08	4.06721e-10	1.3204e-09	6.79196	0.363636	0.169231	0.278261	0.149123	0.0959302
Rab8b	-0.474008	0.697	0.767	1.62407e-07	5.23826e-08	6.54808e-09	9.23889e-11	6.78939	0.575758	0.805128	0.647826	0.79386	0.75
Cdk6	0.555347	0.582	0.39	1.63604e-07	6.59285e-09	2.72399e-10	8.14671e-10	6.78621	0.575758	0.620513	0.552174	0.469298	0.337209
Eif4e2	0.911426	0.431	0.245	1.64788e-07	4.53604e-08	1.96528e-11	1.09996e-10	6.78307	0.484848	0.261538	0.543478	0.324561	0.19186
Prxl2c	0.79733	0.458	0.273	1.65189e-07	5.75875e-08	9.84415e-11	5.42937e-10	6.78202	0.583333	0.358974	0.469565	0.29386	0.258721
Kmt2a	-0.21602	0.801	0.837	1.65355e-07	3.83799e-09	0.00216406	0.00652635	6.78158	0.818182	0.748718	0.8	0.872807	0.813953
Bmf	1.45338	0.201	0.075	1.67827e-07	1.24643e-07	7.53939e-10	3.08993e-09	6.77514	0.287879	0.138462	0.204348	0.100877	0.0581395
Eif3a	0.498393	0.81	0.579	1.71167e-07	9.92982e-08	2.13732e-12	2.04025e-16	6.76658	0.833333	0.764103	0.826087	0.574561	0.581395
Vopp1	0.337664	0.519	0.406	1.73515e-07	4.30552e-09	0.000477034	0.000631912	6.76066	0.439394	0.687179	0.426087	0.399123	0.409884
Mmp2	-1.01983	0.208	0.194	1.75721e-07	1.72569e-19	0.99291	3.04971e-08	6.75518	0.280303	0.102564	0.256522	0.127193	0.238372
Narf	0.417164	0.522	0.409	1.77304e-07	1.62696e-08	0.000158756	0.000500064	6.75128	0.469697	0.605128	0.482609	0.394737	0.418605
Sh2d1b1	0.981754	0.293	0.156	1.80527e-07	8.25046e-08	2.09787e-08	1.05828e-07	6.74346	0.242424	0.205128	0.395652	0.179825	0.139535
Cass4	1.02929	0.242	0.117	1.85252e-07	4.79578e-08	4.93633e-08	2.23483e-07	6.73224	0.257576	0.235897	0.23913	0.118421	0.116279
Chst3	1.03253	0.452	0.28	1.86219e-07	1.67795e-12	6.39879e-11	3.96166e-11	6.72998	0.681818	0.230769	0.508696	0.280702	0.27907
Pgp	-0.558718	0.745	0.897	1.89484e-07	1.69515e-07	1.27922e-15	1.92949e-15	6.72243	0.598485	0.933333	0.643478	0.850877	0.927326
Tgfb1	0.274306	0.986	0.986	1.89735e-07	6.44787e-11	4.58605e-09	6.18361e-08	6.72185	0.924242	0.979487	0.986957	0.982456	0.988372
Cnpy2	0.722476	0.539	0.316	1.92407e-07	6.24406e-08	1.50458e-12	2.55647e-13	6.71578	0.477273	0.502564	0.604348	0.390351	0.267442
Ddx3x	-0.322493	0.977	0.998	1.9308e-07	4.57408e-08	3.39306e-16	3.99957e-17	6.71426	0.954545	0.994872	0.965217	1	0.997093
Rbpms2	1.28041	0.169	0.075	1.96532e-07	4.75619e-09	1.15452e-06	4.13074e-06	6.70657	0.113636	0.184615	0.186957	0.0877193	0.0668605
Prps1l3	-0.402059	0.874	0.935	1.9727e-07	3.26727e-08	4.89601e-11	2.24001e-10	6.70494	0.818182	0.94359	0.8	0.947368	0.927326
Poc1a	0.815945	0.287	0.166	1.98766e-07	9.20151e-08	1.0419e-06	5.94613e-06	6.70166	0.212121	0.405128	0.230435	0.210526	0.136628
Zdhhc3	0.52976	0.657	0.491	1.99157e-07	2.32482e-08	2.23477e-08	3.7183e-08	6.7008	0.674242	0.682051	0.626087	0.5	0.485465
Cd27	1.28469	0.325	0.178	1.99164e-07	1.03732e-11	2.5161e-09	1.34697e-09	6.70079	0.477273	0.158974	0.378261	0.192982	0.168605
Sema3a	1.3301	0.21	0.082	1.99249e-07	2.47657e-08	1.01627e-09	5.17584e-09	6.7006	0.234848	0.0974359	0.291304	0.0833333	0.0813953
Tkt	0.194388	0.991	0.998	1.99752e-07	1.78904e-14	0.317643	0.045776	6.69951	1	0.994872	0.986957	1	0.997093
Elane	0.457439	0.583	0.538	2.01953e-07	1.0402e-56	0.0652996	0.0748246	6.69475	0.212121	0.748718	0.63913	0.469298	0.584302
Hepacam2	1.32127	0.223	0.098	2.0439e-07	1.65013e-07	6.19008e-09	8.87519e-09	6.68954	0.257576	0.117949	0.291304	0.118421	0.0843023
Ktn1	-0.334321	0.838	0.885	2.04727e-07	3.91119e-09	4.46269e-06	5.04366e-06	6.68883	0.75	0.902564	0.795652	0.903509	0.872093
Kif13b	0.912049	0.418	0.226	2.063e-07	2.59699e-08	4.15128e-12	2.46631e-11	6.6855	0.575758	0.251282	0.469565	0.263158	0.200581
Numb	0.894181	0.404	0.227	2.06542e-07	9.68622e-08	1.28029e-10	7.38518e-10	6.68499	0.462121	0.312821	0.447826	0.285088	0.188953
Foxo1	0.745622	0.652	0.503	2.07305e-07	2.21781e-10	4.50226e-11	7.69147e-12	6.68339	0.840909	0.410256	0.743478	0.552632	0.47093
Prcc	0.612221	0.546	0.392	2.08127e-07	9.0567e-08	3.98142e-08	1.57667e-07	6.68167	0.590909	0.54359	0.521739	0.403509	0.383721
Epor	0.384428	0.348	0.262	2.08258e-07	7.77635e-09	0.00222265	0.00690753	6.6814	0.128788	0.523077	0.326087	0.192982	0.30814
Igf1r	0.844016	0.321	0.191	2.0905e-07	2.0852e-07	2.45973e-07	9.04042e-07	6.67975	0.287879	0.261538	0.391304	0.223684	0.168605
Rell1	0.671946	0.504	0.294	2.09322e-07	3.40744e-08	7.53343e-12	1.54813e-12	6.67918	0.545455	0.502564	0.482609	0.342105	0.261628
Ackr3	1.00333	0.357	0.178	2.10572e-07	1.28413e-09	1.0449e-11	6.56829e-11	6.6766	0.44697	0.276923	0.373913	0.171053	0.18314
Pacs2	0.772642	0.458	0.301	2.10824e-07	6.05811e-08	5.87633e-09	1.71899e-08	6.67608	0.55303	0.384615	0.465217	0.302632	0.299419
Mpp6	0.790651	0.422	0.25	2.12476e-07	4.51783e-08	1.67068e-09	6.05668e-09	6.67269	0.378788	0.374359	0.486957	0.285088	0.226744
Tob2	-0.372943	0.715	0.708	2.14673e-07	3.67298e-08	0.000488636	1.00513e-10	6.66822	0.727273	0.748718	0.669565	0.662281	0.738372
Golph3	0.726394	0.575	0.337	2.14735e-07	1.61281e-08	2.19857e-13	7.04155e-15	6.6681	0.575758	0.471795	0.66087	0.377193	0.311047
Map3k1	-0.197998	0.995	1	2.14928e-07	7.09079e-11	8.12114e-06	1.06926e-05	6.66771	0.931818	0.989744	0.995652	1	1
Ggact	1.20415	0.259	0.117	2.18697e-07	8.47924e-08	6.7197e-10	3.63379e-09	6.66016	0.310606	0.210256	0.269565	0.127193	0.110465
Golph3l	0.839956	0.357	0.212	2.1974e-07	1.24556e-07	2.68376e-08	1.41434e-07	6.65809	0.325758	0.302564	0.421739	0.241228	0.19186
Hsd11b1	0.714115	0.479	0.295	2.20766e-07	2.09942e-08	9.8249e-10	1.58367e-09	6.65607	0.477273	0.379487	0.565217	0.346491	0.261628
Serpinb6a	1.09	0.287	0.129	2.21523e-07	2.88856e-08	1.11749e-10	2.82551e-10	6.65458	0.30303	0.189744	0.36087	0.131579	0.127907
Rfx7	0.764476	0.566	0.36	2.24574e-07	4.44721e-08	3.03396e-12	1.07801e-11	6.64864	0.734848	0.451282	0.569565	0.399123	0.334302
2007-09-01	0.800474	0.522	0.292	2.28907e-07	6.7427e-08	1.22604e-13	1.79243e-14	6.64034	0.598485	0.410256	0.573913	0.364035	0.244186
Atrnl1	0.815945	0.452	0.271	2.30532e-07	2.78358e-08	6.96148e-11	6.87579e-10	6.63727	0.606061	0.323077	0.473913	0.368421	0.206395
Uqcrc2	-0.345856	0.858	0.888	2.30921e-07	2.84677e-08	1.42492e-08	5.41507e-09	6.63654	0.840909	0.887179	0.830435	0.907895	0.875
Rab12	1.04482	0.309	0.168	2.35785e-07	8.56263e-08	5.44134e-09	6.3298e-09	6.62748	0.424242	0.230769	0.308696	0.201754	0.145349
Ncf1	-0.3019	0.984	0.997	2.39848e-07	6.23203e-16	1.67399e-10	8.30145e-10	6.62006	0.901515	0.989744	0.978261	0.995614	0.997093
Cyth3	0.942123	0.259	0.136	2.41569e-07	7.63981e-08	2.60731e-07	1.34495e-06	6.61696	0.25	0.220513	0.295652	0.105263	0.156977
Rab8a	0.438831	0.901	0.776	2.42532e-07	3.94891e-08	1.18402e-09	1.02136e-10	6.61523	0.886364	0.85641	0.913043	0.79386	0.764535
4833420G17Rik	-0.305756	0.781	0.846	2.43042e-07	2.25078e-08	6.42851e-06	3.32685e-05	6.61432	0.787879	0.815385	0.717391	0.855263	0.840116
Phf20l1	0.808093	0.49	0.337	2.45257e-07	1.2881e-08	7.83983e-09	3.76196e-09	6.61038	0.621212	0.358974	0.526087	0.407895	0.290698
Esco1	1.06481	0.348	0.198	2.47787e-07	2.81028e-08	1.98684e-09	1.41202e-09	6.60592	0.492424	0.220513	0.373913	0.223684	0.180233
Dnmt3a	0.583164	0.715	0.519	2.49443e-07	1.13101e-09	3.49178e-12	1.24354e-11	6.60303	0.825758	0.548718	0.773913	0.526316	0.514535
Akip1	1.23426	0.203	0.086	2.53904e-07	2.13466e-07	1.84003e-08	9.77999e-08	6.59533	0.181818	0.225641	0.195652	0.0789474	0.0901163
Nfkbiz	1.04363	0.361	0.191	2.56796e-07	5.96897e-08	8.26564e-11	3.45187e-10	6.59041	0.583333	0.210256	0.36087	0.20614	0.180233
Cox19	-0.581058	0.575	0.71	2.57244e-07	3.44828e-08	1.2343e-09	1.51816e-09	6.58966	0.469697	0.769231	0.46087	0.70614	0.712209
Pgk1	-0.345696	0.698	0.666	2.59316e-07	8.41799e-10	0.0214892	5.25486e-10	6.58617	0.712121	0.666667	0.708696	0.745614	0.613372
Cep89	0.783081	0.345	0.224	2.64625e-07	8.36902e-08	2.13254e-06	3.12678e-06	6.57737	0.371212	0.384615	0.295652	0.245614	0.209302
Huwe1	-0.305585	0.916	0.93	2.6709e-07	2.45182e-08	3.33759e-07	2.52201e-07	6.57334	0.848485	0.94359	0.878261	0.938596	0.924419
Ufsp1	0.539031	0.32	0.241	2.68247e-07	8.81015e-09	0.00169054	0.00388948	6.57146	0.212121	0.4	0.313043	0.27193	0.22093
Idh3g	0.705015	0.56	0.355	2.6939e-07	1.12244e-07	1.59489e-11	2.79183e-11	6.56962	0.606061	0.476923	0.604348	0.381579	0.337209
Usp3	0.896918	0.413	0.245	2.71553e-07	2.70817e-07	3.45235e-10	1.09943e-09	6.56614	0.515152	0.287179	0.46087	0.254386	0.238372
Tsc22d1	0.395293	0.819	0.726	2.7171e-07	2.97916e-10	3.54371e-05	3.10689e-05	6.56589	0.833333	0.717949	0.886957	0.653509	0.773256
Fam126a	0.540548	0.487	0.339	2.7254e-07	5.21101e-09	7.80402e-07	2.89575e-06	6.56457	0.477273	0.569231	0.421739	0.346491	0.334302
M6pr	0.645703	0.645	0.458	2.74263e-07	2.72845e-08	3.94619e-11	1.59849e-10	6.56183	0.719697	0.517949	0.717391	0.495614	0.43314
Adsl	-0.5019	0.686	0.834	2.77382e-07	2.40633e-08	5.7053e-12	3.02869e-11	6.55692	0.55303	0.85641	0.586957	0.859649	0.81686
Dennd4b	-0.302356	0.768	0.785	2.83237e-07	1.34211e-08	0.000113076	2.77313e-06	6.54785	0.780303	0.74359	0.752174	0.767544	0.796512
Ifitm2	0.88958	0.354	0.205	2.83997e-07	3.01382e-08	1.59467e-08	7.11597e-08	6.54669	0.44697	0.297436	0.347826	0.280702	0.15407
Dnah8	1.25466	0.232	0.11	2.85415e-07	1.48162e-07	2.50666e-08	1.85082e-08	6.54452	0.386364	0.194872	0.173913	0.122807	0.101744
Ssr2	0.695637	0.616	0.393	2.89329e-07	1.10045e-08	1.19311e-12	5.10705e-13	6.53861	0.628788	0.497436	0.713043	0.442982	0.360465
Plvap	0.402377	0.883	0.797	2.91919e-07	3.73221e-14	1.25291e-08	1.20265e-07	6.53474	0.810606	0.830769	0.934783	0.72807	0.843023
Rnf123	0.247534	0.833	0.706	2.93948e-07	7.97939e-09	0.000466942	2.41465e-06	6.53173	0.69697	0.933333	0.791304	0.679825	0.723837
Pink1	0.455635	0.756	0.598	2.98385e-07	2.80727e-08	1.36701e-08	1.58386e-08	6.52522	0.787879	0.65641	0.821739	0.596491	0.598837
Gmfb	-0.35415	0.741	0.766	3.0401e-07	1.06081e-08	2.68078e-05	1.15775e-07	6.51711	0.742424	0.784615	0.682609	0.824561	0.726744
Hook3	1.04494	0.318	0.161	3.05488e-07	2.16896e-07	5.31128e-10	2.64852e-09	6.51501	0.401515	0.241026	0.334783	0.22807	0.116279
Atp11c	0.717152	0.488	0.29	3.05595e-07	2.9002e-08	5.74013e-11	5.66373e-11	6.51485	0.621212	0.45641	0.43913	0.311404	0.276163
Pde5a	0.649381	0.336	0.233	3.08137e-07	1.2781e-11	0.000125562	0.000446236	6.51126	0.234848	0.471795	0.278261	0.289474	0.194767
Ccna2	-0.406807	0.899	0.995	3.12479e-07	0.257311	4.6171e-17	5.66447e-23	6.50518	0.69697	0.979487	0.891304	0.991228	0.997093
Ptk2	1.19034	0.241	0.11	3.14509e-07	1.59672e-07	5.42172e-09	2.51569e-08	6.50237	0.265152	0.169231	0.286957	0.144737	0.0872093
Ndufa5	-0.479358	0.79	0.911	3.15739e-07	9.58757e-08	4.69481e-16	2.12562e-14	6.50067	0.712121	0.907692	0.726087	0.925439	0.901163
Crat	0.600045	0.478	0.327	3.15838e-07	1.09489e-08	4.12082e-07	1.38863e-06	6.50054	0.515152	0.482051	0.452174	0.307018	0.340116
Pdpr	1.01816	0.321	0.166	3.16731e-07	3.16245e-07	7.72814e-10	4.08956e-09	6.49931	0.393939	0.25641	0.334783	0.201754	0.142442
Sos2	0.933368	0.314	0.17	3.18173e-07	2.29697e-07	1.0754e-08	6.35968e-08	6.49734	0.386364	0.276923	0.304348	0.197368	0.151163
R3hdm2	0.805586	0.445	0.274	3.1833e-07	2.1168e-07	9.2746e-10	4.36059e-09	6.49712	0.560606	0.374359	0.43913	0.276316	0.273256
Dut	-0.429425	0.941	0.995	3.20505e-07	6.44283e-08	1.36102e-13	3.20752e-16	6.49417	0.795455	0.984615	0.934783	0.991228	0.997093
Elmsan1	-0.307229	0.849	0.867	3.22663e-07	7.37255e-09	3.16347e-06	4.60748e-07	6.49125	0.810606	0.902564	0.786957	0.890351	0.851744
Sema4d	0.788646	0.585	0.4	3.26913e-07	9.07921e-09	4.20743e-11	8.22668e-11	6.48557	0.712121	0.369231	0.7	0.473684	0.351744
Wdr76	-0.554313	0.686	0.822	3.30286e-07	1.08028e-07	4.09258e-12	1.33219e-11	6.48111	0.590909	0.892308	0.53913	0.837719	0.811047
Psenen	-0.260588	0.882	0.857	3.35072e-07	3.25544e-08	0.000405878	1.10721e-07	6.47486	0.886364	0.841026	0.891304	0.842105	0.866279
Atp5b	-0.252963	0.989	0.998	3.35292e-07	7.39194e-10	6.33852e-09	5.83041e-08	6.47458	0.977273	0.989744	0.991304	1	0.997093
Diaph2	0.817014	0.472	0.285	3.38344e-07	9.60679e-08	7.52165e-11	3.20499e-10	6.47064	0.530303	0.369231	0.526087	0.333333	0.252907
Dennd1c	0.922861	0.501	0.288	3.40617e-07	1.54745e-09	2.60473e-13	8.94205e-13	6.46773	0.712121	0.302564	0.547826	0.372807	0.232558
Cmtr1	0.528802	0.718	0.542	3.43315e-07	4.68092e-08	6.61172e-10	1.01156e-09	6.46431	0.795455	0.676923	0.704348	0.578947	0.517442
Rac1	0.721994	0.632	0.406	3.45024e-07	1.11137e-08	3.14988e-13	1.43449e-13	6.46215	0.719697	0.420513	0.76087	0.517544	0.331395
Tyk2	-0.394771	0.718	0.745	3.46476e-07	2.31234e-08	7.20565e-06	3.66168e-09	6.46033	0.757576	0.784615	0.617391	0.789474	0.715116
Zfp593	0.684054	0.485	0.322	3.48464e-07	7.40967e-08	9.72835e-09	5.8828e-08	6.45784	0.409091	0.548718	0.473913	0.368421	0.290698
Atad2	0.396723	0.601	0.449	3.4874e-07	2.31857e-08	6.12707e-06	1.70591e-06	6.4575	0.590909	0.687179	0.534783	0.473684	0.43314
Med4	-0.531978	0.625	0.733	3.49357e-07	1.83314e-08	3.80516e-09	2.39467e-09	6.45673	0.613636	0.707692	0.53913	0.736842	0.729651
Izumo1r	1.16998	0.327	0.206	3.53267e-07	4.37556e-10	3.57254e-07	2.86151e-09	6.4519	0.340909	0.235897	0.395652	0.276316	0.159884
Igkv19-93	0.915309	0.61	0.446	3.55608e-07	3.18456e-31	2.17826e-09	4.50054e-09	6.44903	0.515152	0.328205	0.886957	0.5	0.409884
Msl2	0.745556	0.553	0.337	3.563e-07	2.16742e-08	1.93468e-12	2.23498e-12	6.44818	0.636364	0.446154	0.6	0.394737	0.299419
Setd1b	1.00323	0.296	0.156	3.56859e-07	1.60029e-07	1.29823e-08	5.95438e-08	6.4475	0.378788	0.266667	0.273913	0.175439	0.142442
Ccr2	0.702683	0.562	0.327	3.58023e-07	4.86303e-10	3.64814e-14	1.21567e-14	6.44609	0.568182	0.461538	0.643478	0.298246	0.34593
Tet2	1.02563	0.329	0.171	3.58761e-07	3.55686e-07	5.95277e-10	2.80743e-09	6.44519	0.363636	0.210256	0.408696	0.20614	0.148256
Fpr2	1.07396	0.197	0.091	3.60675e-07	2.46183e-07	3.98089e-07	1.5192e-06	6.44288	0.0984848	0.2	0.252174	0.118421	0.0726744
Paip2	0.432511	0.91	0.816	3.63522e-07	3.28279e-08	3.82724e-10	9.39505e-10	6.43947	0.94697	0.825641	0.93913	0.789474	0.834302
Rbm7	0.960859	0.37	0.224	3.64805e-07	8.52731e-08	1.27129e-08	7.31294e-09	6.43794	0.378788	0.210256	0.5	0.311404	0.165698
Lmnb1	-0.489098	0.732	0.851	3.65498e-07	1.53939e-07	1.64555e-12	1.07875e-11	6.43711	0.560606	0.882051	0.678261	0.850877	0.851744
Mrc1	0.476232	0.548	0.432	3.65805e-07	6.47594e-11	2.60205e-05	0.000113297	6.43675	0.530303	0.487179	0.613043	0.425439	0.436047
Tmem185a	1.07432	0.307	0.145	3.66728e-07	3.45007e-07	9.55266e-11	4.41279e-10	6.43566	0.318182	0.225641	0.369565	0.140351	0.148256
Ckap5	0.54206	0.578	0.381	3.69416e-07	3.63093e-08	6.06772e-09	1.25733e-10	6.43248	0.568182	0.6	0.565217	0.438596	0.343023
Fh1	-0.345594	0.745	0.738	3.76527e-07	2.02711e-09	0.00388866	1.68807e-07	6.4242	0.742424	0.794872	0.691304	0.807018	0.69186
Ssbp4	0.675362	0.503	0.325	3.77742e-07	1.52874e-07	1.81218e-09	7.51841e-09	6.4228	0.477273	0.410256	0.595652	0.372807	0.293605
Cmbl	1.05626	0.221	0.121	3.87067e-07	2.2836e-08	4.89325e-06	9.34366e-06	6.41221	0.287879	0.205128	0.195652	0.127193	0.116279
Aqp1	-0.1452	0.876	0.881	3.89944e-07	2.19431e-14	0.0555028	0.089686	6.409	0.742424	0.948718	0.873913	0.776316	0.950581
Arhgap11a	-0.50915	0.74	0.865	3.91622e-07	7.67684e-07	1.16895e-14	5.55254e-13	6.40713	0.621212	0.94359	0.608696	0.855263	0.872093
Sntb1	1.2104	0.262	0.107	3.91748e-07	1.60589e-07	3.40552e-11	3.97522e-11	6.40699	0.356061	0.210256	0.252174	0.109649	0.104651
Ikbkb	0.727814	0.569	0.369	3.93717e-07	4.78344e-08	1.23792e-11	4.59622e-11	6.40482	0.734848	0.502564	0.530435	0.416667	0.337209
Polr1c	-0.461233	0.829	0.888	3.95123e-07	4.46735e-08	1.65479e-12	1.40285e-12	6.40327	0.75	0.933333	0.734783	0.828947	0.927326
Ube2i	-0.353499	0.862	0.888	3.95485e-07	1.13017e-07	2.98738e-08	3.60059e-09	6.40287	0.825758	0.897436	0.817391	0.877193	0.895349
Cog5	1.05072	0.334	0.175	3.98739e-07	3.97709e-07	3.47398e-10	1.23184e-09	6.39931	0.409091	0.220513	0.386957	0.210526	0.151163
Ncoa5	0.7046	0.478	0.311	4.14762e-07	2.01538e-07	4.28552e-09	2.76269e-08	6.3822	0.492424	0.425641	0.513043	0.311404	0.311047
Utp20	0.866451	0.354	0.201	4.15391e-07	3.95398e-07	6.55411e-09	4.11049e-08	6.38154	0.280303	0.364103	0.386957	0.236842	0.177326
Fpr1	0.98587	0.237	0.121	4.19616e-07	8.98128e-08	3.32083e-07	1.76405e-06	6.37715	0.25	0.169231	0.286957	0.109649	0.127907
Dusp10	1.00062	0.37	0.226	4.21363e-07	1.19689e-07	1.16489e-08	1.63054e-09	6.37534	0.590909	0.215385	0.373913	0.302632	0.174419
Fam129a	0.909889	0.338	0.194	4.23141e-07	6.81832e-08	2.72849e-08	1.17591e-07	6.37352	0.356061	0.215385	0.430435	0.214912	0.180233
Vrk2	-0.446479	0.662	0.747	4.23667e-07	4.13846e-08	1.15203e-07	3.79576e-08	6.37298	0.598485	0.758974	0.595652	0.754386	0.741279
Rack1	0.274269	1	1	4.29472e-07	1.14143e-26	8.54763e-12	1.04159e-12	6.36707	1	1	1	1	1
Fcho1	0.48919	0.598	0.421	4.31723e-07	1.0349e-07	1.75491e-07	1.71992e-08	6.36479	0.530303	0.717949	0.534783	0.45614	0.398256
Myo1e	0.938371	0.469	0.273	4.3777e-07	5.10912e-09	6.78668e-12	2.01958e-11	6.35875	0.598485	0.276923	0.556522	0.307018	0.25
Lef1	1.36916	0.266	0.145	4.39819e-07	5.2124e-10	1.0832e-07	4.61092e-09	6.35673	0.545455	0.14359	0.208696	0.179825	0.122093
Nipbl	0.747787	0.549	0.348	4.42275e-07	3.0445e-08	1.46143e-11	4.02061e-11	6.35431	0.666667	0.379487	0.630435	0.381579	0.325581
Faf1	0.683381	0.501	0.299	4.52003e-07	1.2968e-07	4.01097e-11	2.30617e-11	6.34486	0.55303	0.471795	0.495652	0.333333	0.276163
Scml4	1.2714	0.255	0.112	4.53512e-07	1.41694e-07	4.16951e-10	1.75138e-09	6.34341	0.477273	0.179487	0.191304	0.149123	0.0872093
Phf12	-0.231922	0.959	0.983	4.609e-07	4.74287e-08	1.28142e-05	1.14614e-05	6.33639	0.893939	0.953846	0.956522	0.973684	0.988372
Parp6	1.11469	0.282	0.142	4.64782e-07	3.74553e-07	3.72953e-09	9.46352e-09	6.33275	0.371212	0.194872	0.304348	0.197368	0.104651
Lpxn	-0.297898	0.596	0.579	4.67193e-07	3.31844e-10	0.125483	8.08034e-06	6.3305	0.651515	0.528205	0.608696	0.614035	0.555233
Tmem205	1.21522	0.228	0.101	4.76876e-07	7.65751e-08	9.18738e-09	4.41229e-08	6.32159	0.272727	0.184615	0.23913	0.114035	0.0930233
Marcks	-0.170828	0.887	0.902	4.91603e-07	2.96027e-09	0.0157201	0.0341279	6.30839	0.94697	0.769231	0.93913	0.907895	0.898256
Gns	0.733593	0.609	0.402	4.99325e-07	6.35297e-09	1.34656e-12	5.47969e-12	6.30162	0.689394	0.451282	0.695652	0.394737	0.406977
Abcc9	1.06449	0.262	0.128	5.05826e-07	5.04055e-07	1.0785e-08	5.81041e-08	6.296	0.287879	0.215385	0.286957	0.166667	0.101744
Ryk	0.810927	0.346	0.199	5.0682e-07	1.10278e-07	4.44436e-08	1.73307e-07	6.29515	0.371212	0.317949	0.356522	0.280702	0.145349
Wac	0.695166	0.49	0.32	5.10883e-07	1.70637e-07	2.65699e-09	1.67445e-08	6.29168	0.560606	0.389744	0.534783	0.390351	0.273256
Tmem215	1.34709	0.172	0.065	5.1312e-07	1.69441e-07	2.40575e-08	7.98634e-08	6.28978	0.212121	0.138462	0.178261	0.0570175	0.0697674
Adgrg1	0.374962	0.456	0.325	5.1373e-07	6.94205e-08	4.45289e-05	1.31283e-05	6.28927	0.318182	0.579487	0.430435	0.302632	0.340116
Abhd5	0.897923	0.318	0.175	5.15551e-07	5.64111e-08	2.45792e-08	1.41331e-07	6.28773	0.340909	0.276923	0.33913	0.20614	0.15407
Ubl7	0.686252	0.548	0.341	5.18112e-07	1.70836e-07	2.6878e-11	2.06346e-11	6.28558	0.583333	0.482051	0.586957	0.355263	0.331395
Tmem176a	0.634553	0.716	0.542	5.18438e-07	2.69302e-08	1.3862e-12	8.95471e-12	6.2853	0.871212	0.461538	0.830435	0.565789	0.526163
Prkcd	0.705515	0.63	0.432	5.24181e-07	4.36103e-08	4.34322e-12	1.57545e-11	6.28052	0.75	0.405128	0.752174	0.47807	0.401163
Cd3eap	0.925863	0.284	0.152	5.35907e-07	3.93289e-07	6.51867e-08	4.08951e-07	6.27091	0.242424	0.338462	0.26087	0.210526	0.113372
Camta2	-0.328026	0.668	0.678	5.385e-07	3.98651e-08	0.00138299	6.85832e-07	6.26881	0.734848	0.697436	0.595652	0.719298	0.651163
Arl6ip4	-0.456845	0.718	0.792	5.42695e-07	5.02605e-08	4.84896e-08	1.15196e-08	6.26544	0.651515	0.846154	0.621739	0.824561	0.770349
Smarcd1	1.05313	0.294	0.142	5.45568e-07	2.82439e-07	5.13466e-10	2.8161e-09	6.26315	0.371212	0.251282	0.286957	0.144737	0.139535
Cavin1	1.21267	0.287	0.129	5.47258e-07	1.25336e-10	1.74608e-10	3.36303e-10	6.26181	0.409091	0.205128	0.286957	0.122807	0.133721
Traj11	1.38026	0.25	0.128	5.56419e-07	4.98419e-09	4.15779e-08	4.96344e-09	6.2546	0.401515	0.133333	0.26087	0.162281	0.104651
Jmjd1c	1.1599	0.28	0.136	5.61873e-07	3.68671e-07	1.39868e-09	4.21362e-09	6.25036	0.340909	0.153846	0.352174	0.175439	0.110465
Egr1	0.995992	0.454	0.255	5.62438e-07	1.2491e-10	1.10174e-12	4.44837e-12	6.24993	0.719697	0.282051	0.447826	0.307018	0.22093
Foxj3	0.947826	0.366	0.21	5.65349e-07	1.60589e-07	1.76267e-09	6.31468e-09	6.24768	0.477273	0.287179	0.369565	0.276316	0.165698
Srsf7	-0.378998	0.743	0.778	5.6707e-07	8.21056e-08	6.57645e-06	6.23557e-08	6.24636	0.742424	0.805128	0.665217	0.828947	0.744186
Zfp644	0.686494	0.434	0.266	5.71324e-07	2.58038e-07	1.31753e-08	1.6314e-08	6.24312	0.484848	0.471795	0.373913	0.285088	0.252907
Psmc4	0.513466	0.689	0.488	5.74478e-07	1.14025e-07	6.13554e-10	4.24071e-11	6.24073	0.651515	0.728205	0.682609	0.504386	0.476744
Prmt1	-0.453067	0.772	0.843	5.80617e-07	9.44189e-08	3.223e-10	2.27703e-10	6.23611	0.659091	0.917949	0.691304	0.881579	0.81686
Susd1	0.799933	0.366	0.205	5.81908e-07	1.92072e-07	3.80992e-09	9.88419e-09	6.23515	0.44697	0.282051	0.391304	0.179825	0.22093
Klhl9	0.514857	0.725	0.538	5.91976e-07	7.98908e-08	2.43377e-10	1.99583e-10	6.2277	0.825758	0.661538	0.713043	0.5	0.563953
Hdac9	0.893948	0.433	0.25	5.94768e-07	2.00294e-07	4.47872e-11	2.55798e-10	6.22565	0.522727	0.266667	0.521739	0.342105	0.188953
Srsf4	-0.409317	0.876	0.969	5.96432e-07	1.84128e-07	7.87807e-14	4.33165e-15	6.22444	0.810606	0.923077	0.830435	0.982456	0.959302
Slc12a2	1.18217	0.215	0.098	5.9664e-07	5.3698e-07	4.36811e-08	2.00063e-07	6.22429	0.189394	0.164103	0.273913	0.118421	0.0843023
Dcn	-0.900883	0.239	0.224	6.03396e-07	1.12135e-31	0.968492	4.3356e-05	6.2194	0.378788	0.194872	0.195652	0.201754	0.238372
Flt3l	0.912807	0.42	0.247	6.177e-07	3.56563e-08	2.98687e-10	1.10688e-09	6.20922	0.55303	0.297436	0.447826	0.302632	0.209302
Tm9sf2	-0.283214	0.93	0.967	6.34705e-07	3.6272e-08	1.86735e-05	8.94276e-06	6.19743	0.893939	0.94359	0.926087	0.934211	0.988372
Wwp2	0.383905	0.686	0.561	6.35824e-07	3.37249e-08	9.10739e-06	2.75701e-05	6.19666	0.666667	0.74359	0.63913	0.552632	0.56686
Dtnb	1.10545	0.266	0.129	6.37203e-07	5.07567e-07	5.5703e-09	2.65613e-08	6.19572	0.265152	0.210256	0.313043	0.171053	0.101744
Nsd3	0.526238	0.754	0.619	6.39487e-07	3.92844e-08	1.60187e-09	3.32871e-09	6.19417	0.848485	0.641026	0.778261	0.649123	0.598837
Ell2	-0.444641	0.81	0.853	6.40109e-07	1.91674e-08	5.78441e-08	5.04532e-09	6.19375	0.537879	0.887179	0.86087	0.864035	0.84593
Taok3	0.535734	0.738	0.573	6.44007e-07	8.42257e-08	6.6485e-10	1.24434e-09	6.19111	0.742424	0.625641	0.817391	0.609649	0.549419
Psmd3	0.567652	0.592	0.397	6.60934e-07	2.93875e-08	1.09952e-09	3.54185e-10	6.17984	0.583333	0.594872	0.6	0.464912	0.351744
Stx5a	0.794669	0.472	0.294	6.6564e-07	1.56815e-07	5.00429e-10	1.98761e-09	6.17676	0.568182	0.364103	0.508696	0.355263	0.252907
Plek2	0.672544	0.215	0.138	6.76802e-07	1.61678e-07	0.000703712	0.0028235	6.16954	0.128788	0.394872	0.113043	0.153509	0.127907
Polr3gl	0.686552	0.483	0.311	6.80462e-07	3.13299e-07	2.61769e-09	1.67353e-08	6.1672	0.545455	0.471795	0.456522	0.372807	0.270349
Cox7a2	0.484536	0.795	0.587	6.87409e-07	3.23819e-08	3.20958e-11	1.94746e-13	6.16278	0.772727	0.738462	0.852174	0.631579	0.55814
Dock10	0.709105	0.657	0.456	6.87459e-07	6.40992e-09	3.15696e-12	6.34219e-12	6.16275	0.780303	0.476923	0.730435	0.535088	0.40407
Fam76b	0.73136	0.483	0.306	6.89118e-07	1.92637e-07	4.41225e-10	3.50278e-09	6.16171	0.568182	0.394872	0.508696	0.381579	0.255814
Mib1	0.735269	0.512	0.35	6.9807e-07	4.29767e-08	1.52923e-09	5.3018e-09	6.1561	0.568182	0.348718	0.621739	0.394737	0.319767
Slc9a3r2	0.789659	0.472	0.281	6.98469e-07	1.46998e-08	7.61289e-11	2.36843e-10	6.15585	0.621212	0.348718	0.491304	0.280702	0.281977
Ric8a	0.851022	0.434	0.247	7.03822e-07	8.237e-08	5.82135e-11	1.73814e-10	6.15254	0.5	0.328205	0.486957	0.276316	0.226744
Batf3	-0.658901	0.332	0.418	7.08132e-07	8.66869e-09	0.000193735	2.84201e-06	6.14989	0.325758	0.364103	0.308696	0.464912	0.386628
Thy1	0.964809	0.483	0.302	7.19758e-07	2.16122e-11	7.51448e-11	2.33504e-10	6.14281	0.643939	0.307692	0.53913	0.350877	0.270349
Nars	-0.419745	0.885	0.92	7.26372e-07	2.19007e-07	7.23357e-12	6.11451e-12	6.13884	0.780303	0.974359	0.821739	0.921053	0.918605
Rbm45	0.77231	0.42	0.269	7.27347e-07	3.57791e-07	2.55058e-08	8.45526e-08	6.13826	0.44697	0.435897	0.391304	0.29386	0.252907
Toe1	0.977513	0.303	0.159	7.37811e-07	3.11308e-07	8.32129e-09	4.36505e-08	6.13205	0.287879	0.317949	0.3	0.201754	0.130814
Phf2	0.813707	0.454	0.283	7.37926e-07	1.14996e-07	8.66144e-10	3.85102e-09	6.13199	0.560606	0.333333	0.495652	0.350877	0.238372
Stx17	0.800178	0.366	0.234	7.40754e-07	2.24701e-07	3.40322e-07	6.21528e-07	6.13033	0.409091	0.333333	0.369565	0.245614	0.226744
Cxcr5	-0.223752	0.648	0.629	7.41077e-07	4.59729e-14	0.34177	0.00611702	6.13014	0.780303	0.538462	0.634783	0.605263	0.645349
Eef1g	0.429747	0.944	0.92	7.49093e-07	5.33894e-10	4.11525e-13	1.06905e-12	6.12546	0.924242	0.851282	1	0.947368	0.901163
Rprd1a	0.874839	0.35	0.194	7.5216e-07	2.29731e-07	4.03571e-09	2.23598e-08	6.12369	0.401515	0.328205	0.33913	0.214912	0.180233
Ranbp3	-0.495943	0.661	0.726	7.53249e-07	2.37022e-07	4.80687e-08	7.85913e-11	6.12306	0.590909	0.794872	0.56087	0.666667	0.764535
1700024B05Rik	-0.596787	0.443	0.533	7.60069e-07	7.9798e-09	9.8784e-06	9.64566e-08	6.11915	0.575758	0.476923	0.343478	0.583333	0.5
B4galnt1	0.564407	0.849	0.74	7.62239e-07	5.88776e-10	1.28022e-09	7.85934e-10	6.11791	0.886364	0.733333	0.891304	0.785088	0.709302
Fnbp1	0.65849	0.7	0.476	7.73137e-07	1.25548e-07	5.10881e-13	6.52101e-14	6.11174	0.840909	0.507692	0.782609	0.583333	0.40407
Mylip	0.77658	0.463	0.29	7.73379e-07	8.75101e-08	6.8399e-10	4.65299e-09	6.11161	0.568182	0.379487	0.473913	0.307018	0.27907
Treml4	0.75823	0.35	0.212	7.73638e-07	1.6633e-07	1.80753e-07	1.157e-06	6.11146	0.348485	0.261538	0.426087	0.201754	0.218023
Eps15	-0.363494	0.896	0.925	7.7704e-07	1.60911e-07	1.80819e-10	1.51391e-10	6.10956	0.856061	0.928205	0.847826	0.942982	0.912791
Baz1b	-0.397994	0.876	0.928	7.8047e-07	1.26296e-07	2.44764e-10	5.43934e-10	6.10764	0.810606	0.928205	0.830435	0.934211	0.924419
Mylk	1.08016	0.309	0.157	7.82939e-07	3.21016e-08	1.88784e-09	7.58124e-09	6.10627	0.386364	0.158974	0.391304	0.22807	0.110465
Tsc22d4	-0.308957	0.957	0.969	7.86115e-07	4.5934e-08	1.67944e-08	1.18549e-07	6.10451	0.916667	0.964103	0.943478	0.95614	0.976744
Mmp12	-1.56899	0.097	0.117	7.88456e-07	7.18434e-18	0.182802	3.80695e-05	6.10322	0.128788	0.0615385	0.108696	0.0745614	0.145349
Thada	1.05255	0.3	0.147	8.08937e-07	4.44574e-07	6.29526e-10	3.59769e-09	6.09209	0.287879	0.215385	0.378261	0.188596	0.119186
Bhlhe40	0.664957	0.627	0.442	8.13265e-07	2.3654e-08	8.86197e-11	3.17575e-10	6.08977	0.689394	0.492308	0.704348	0.45614	0.43314
Ifit1bl1	1.40845	0.205	0.086	8.13972e-07	5.99166e-07	8.10706e-09	1.21587e-08	6.08939	0.356061	0.102564	0.204348	0.109649	0.0697674
Rnf125	0.861145	0.42	0.259	8.16717e-07	3.31787e-08	1.04989e-09	5.4924e-09	6.08793	0.515152	0.34359	0.430435	0.307018	0.226744
F2rl3	0.822204	0.266	0.161	8.21093e-07	3.76461e-08	1.08844e-05	4.44364e-05	6.08561	0.272727	0.246154	0.278261	0.171053	0.15407
Iqgap2	1.03834	0.262	0.142	8.23302e-07	2.89714e-07	2.31108e-07	3.91639e-07	6.08444	0.348485	0.220513	0.247826	0.153509	0.133721
Szrd1	-0.220468	0.874	0.867	8.2703e-07	1.41648e-07	0.00173547	7.74739e-05	6.08248	0.863636	0.861538	0.856522	0.890351	0.851744
Nae1	-0.420414	0.724	0.797	8.43818e-07	8.0235e-08	5.44264e-08	4.7956e-08	6.07375	0.704545	0.846154	0.608696	0.754386	0.825581
Bclaf3	0.948541	0.32	0.168	8.51769e-07	4.31173e-07	2.71635e-09	1.61948e-08	6.06968	0.356061	0.302564	0.313043	0.223684	0.130814
Zhx2	0.986891	0.388	0.206	8.61017e-07	2.26781e-07	1.09437e-11	8.20993e-11	6.06499	0.537879	0.194872	0.465217	0.223684	0.194767
Ankib1	-0.359678	0.711	0.762	8.62235e-07	7.50546e-08	0.000131904	2.41049e-05	6.06437	0.704545	0.723077	0.678261	0.785088	0.747093
Ptpn2	0.678899	0.508	0.329	8.64199e-07	2.15802e-07	1.35682e-09	5.28477e-09	6.06339	0.621212	0.502564	0.452174	0.372807	0.299419
Eefsec	-0.409634	0.636	0.645	8.65067e-07	3.63187e-08	0.00031482	1.32301e-10	6.06295	0.643939	0.717949	0.552174	0.710526	0.601744
Agtr1a	0.752429	0.224	0.142	8.66024e-07	8.64246e-07	0.000221534	0.000471295	6.06247	0.159091	0.292308	0.204348	0.114035	0.159884
Creg1	-0.453365	0.962	0.972	8.77092e-07	6.05819e-09	1.28525e-12	3.846e-11	6.05695	0.871212	0.989744	0.96087	0.942982	0.991279
Acat1	0.873453	0.329	0.177	8.82135e-07	4.01987e-07	8.32494e-09	2.33678e-08	6.05446	0.318182	0.353846	0.313043	0.232456	0.139535
Tm6sf1	-0.297646	0.614	0.614	8.88135e-07	6.92917e-08	0.0203546	2.27693e-06	6.05152	0.659091	0.569231	0.613043	0.671053	0.575581
Vps37b	0.735977	0.469	0.306	9.0872e-07	1.39328e-07	7.82165e-09	3.36176e-08	6.04157	0.545455	0.4	0.482609	0.302632	0.30814
Gch1	0.178725	0.621	0.537	9.11588e-07	2.80286e-08	0.0224669	0.0132716	6.0402	0.484848	0.748718	0.578261	0.517544	0.549419
Arid2	0.79588	0.408	0.245	9.20506e-07	3.24126e-07	5.93457e-09	2.65195e-08	6.03597	0.492424	0.323077	0.430435	0.254386	0.238372
Stab2	0.291865	0.72	0.629	9.206e-07	7.11979e-09	0.000275358	0.0014393	6.03593	0.659091	0.65641	0.782609	0.570175	0.668605
Ccm2	0.766837	0.575	0.397	9.21168e-07	1.14047e-09	1.37485e-10	3.41414e-10	6.03566	0.75	0.425641	0.6	0.377193	0.409884
Slc36a2	1.46364	0.208	0.112	9.241e-07	1.19431e-09	4.53322e-06	6.44328e-07	6.03428	0.348485	0.2	0.134783	0.122807	0.104651
Prmt3	0.804704	0.424	0.264	9.34156e-07	9.54797e-08	4.86955e-09	2.49541e-08	6.02958	0.5	0.358974	0.434783	0.302632	0.238372
Chst15	0.639092	0.616	0.463	9.38371e-07	1.5198e-08	1.34979e-08	2.11773e-08	6.02763	0.787879	0.435897	0.665217	0.526316	0.421512
Clec1b	0.629755	0.364	0.267	9.38776e-07	3.12411e-09	0.000286552	0.000626462	6.02744	0.265152	0.328205	0.452174	0.337719	0.22093
Ubap1	0.823238	0.366	0.21	9.46999e-07	6.23295e-07	5.32122e-09	3.66429e-08	6.02365	0.348485	0.271795	0.456522	0.254386	0.180233
Emc3	0.714611	0.533	0.362	9.48547e-07	6.63641e-08	1.30714e-09	4.9326e-09	6.02294	0.636364	0.374359	0.613043	0.390351	0.343023
Pdcd4	-0.132238	0.978	0.979	9.68333e-07	4.85272e-14	0.00611557	0.0437426	6.01398	0.954545	0.984615	0.96087	0.95614	0.994186
Ncoa6	0.835948	0.422	0.26	9.77648e-07	2.1038e-07	2.21191e-09	9.47667e-09	6.00982	0.568182	0.297436	0.443478	0.29386	0.238372
Lhfp	0.695234	0.535	0.341	9.78907e-07	4.23881e-09	1.57107e-10	3.13056e-10	6.00926	0.606061	0.374359	0.634783	0.355263	0.331395
Csnk1g2	0.741721	0.567	0.381	9.79139e-07	2.07094e-08	6.15266e-11	2.37325e-10	6.00916	0.643939	0.389744	0.678261	0.377193	0.383721
P2rx1	0.900834	0.239	0.136	9.92559e-07	1.56745e-08	7.09234e-06	3.14535e-05	6.00324	0.151515	0.266667	0.265217	0.166667	0.116279
Tet3	0.899464	0.382	0.217	1.00569e-06	1.85658e-07	9.58625e-10	5.07183e-09	5.99753	0.454545	0.25641	0.447826	0.263158	0.186047
Mfsd10	1.18673	0.206	0.094	1.01577e-06	6.12994e-07	1.14053e-07	4.89154e-07	5.9932	0.166667	0.184615	0.247826	0.114035	0.0813953
Rbm33	0.642409	0.583	0.392	1.01989e-06	9.61219e-08	1.19448e-10	4.62408e-10	5.99145	0.719697	0.492308	0.582609	0.469298	0.340116
Noc2l	0.376754	0.761	0.638	1.02828e-06	1.19246e-07	4.77352e-06	6.66169e-06	5.98789	0.765152	0.815385	0.695652	0.649123	0.630814
Ino80d	0.802525	0.49	0.309	1.03224e-06	1.65713e-07	1.23763e-10	6.60471e-10	5.98622	0.69697	0.317949	0.517391	0.381579	0.261628
Atp1b1	0.881368	0.415	0.271	1.04201e-06	6.25776e-08	2.35858e-08	7.6112e-09	5.98213	0.704545	0.230769	0.404348	0.285088	0.261628
Ahctf1	1.271	0.219	0.089	1.04627e-06	5.00658e-07	1.62498e-09	6.85228e-09	5.98035	0.234848	0.138462	0.278261	0.118421	0.0697674
Fam160b1	0.815945	0.406	0.243	1.06217e-06	1.56545e-07	4.00741e-09	2.11976e-08	5.97381	0.575758	0.312821	0.386957	0.245614	0.241279
Pitpnm1	0.857766	0.44	0.259	1.06454e-06	7.93972e-08	1.14465e-10	6.30131e-10	5.97284	0.522727	0.287179	0.521739	0.29386	0.235465
Gpd1	1.94797	0.16	0.094	1.07477e-06	5.03138e-19	0.000717567	0.000147583	5.96869	0.257576	0.123077	0.134783	0.0526316	0.122093
Ppp6c	0.422139	0.797	0.636	1.08352e-06	2.78169e-07	7.13136e-08	6.10813e-09	5.96516	0.772727	0.774359	0.813043	0.644737	0.630814
Spint2	-0.179663	0.779	0.778	1.09096e-06	5.60523e-08	0.0706178	0.0137084	5.96219	0.742424	0.723077	0.813043	0.828947	0.744186
Ankrd44	0.660592	0.659	0.467	1.09731e-06	6.97706e-08	1.01743e-11	3.7208e-11	5.95967	0.757576	0.564103	0.673913	0.517544	0.43314
2004-09-01	0.750928	0.422	0.243	1.103e-06	1.50583e-07	6.127e-10	1.01264e-09	5.95743	0.507576	0.271795	0.5	0.324561	0.188953
Vegfa	0.749209	0.422	0.274	1.10719e-06	2.92677e-08	1.05627e-07	4.71731e-07	5.95578	0.55303	0.348718	0.408696	0.307018	0.252907
Upf1	-0.355855	0.871	0.892	1.12736e-06	7.38171e-07	9.30622e-09	7.75341e-10	5.94794	0.818182	0.938462	0.8	0.890351	0.892442
Larp7	0.825229	0.361	0.203	1.13983e-06	8.11796e-07	5.38797e-09	2.24224e-08	5.94316	0.318182	0.333333	0.408696	0.241228	0.177326
Etfdh	0.715419	0.39	0.233	1.14538e-06	1.24614e-07	2.23531e-08	7.27438e-08	5.94105	0.393939	0.430769	0.352174	0.232456	0.232558
Rpusd4	0.852592	0.364	0.219	1.14583e-06	5.46214e-07	2.37253e-08	9.5285e-08	5.94088	0.416667	0.312821	0.378261	0.214912	0.22093
Uvrag	0.871228	0.451	0.274	1.15501e-06	1.49204e-07	2.0346e-10	8.13598e-10	5.93742	0.598485	0.307692	0.486957	0.394737	0.194767
Mbnl2	0.788724	0.449	0.266	1.1556e-06	1.4207e-07	1.17526e-10	7.85332e-10	5.93719	0.492424	0.323077	0.530435	0.29386	0.247093
Klf7	0.704061	0.442	0.266	1.16102e-06	6.38801e-08	1.27698e-09	4.25392e-09	5.93516	0.477273	0.451282	0.413043	0.298246	0.244186
Slc29a3	-0.363838	0.578	0.586	1.18105e-06	5.20348e-08	0.0065612	4.30859e-08	5.92773	0.636364	0.54359	0.569565	0.570175	0.59593
Ywhae	-0.180681	0.984	0.99	1.18458e-06	2.48779e-08	0.00288469	0.0235666	5.92644	0.977273	0.979487	0.986957	0.995614	0.985465
Hdc	0.669313	0.271	0.182	1.20059e-06	1.34e-09	0.000199511	0.000806882	5.92061	0.0757576	0.425641	0.252174	0.214912	0.159884
Wipf2	0.938802	0.338	0.178	1.21191e-06	1.2095e-06	9.26613e-10	5.58505e-09	5.91653	0.431818	0.251282	0.356522	0.166667	0.186047
Adam9	-0.49869	0.47	0.484	1.2153e-06	1.15049e-08	0.0163632	6.87833e-10	5.91532	0.492424	0.471795	0.46087	0.491228	0.479651
Adpgk	0.357068	0.605	0.49	1.22665e-06	3.45014e-10	0.000179188	0.000415446	5.91128	0.416667	0.728205	0.604348	0.54386	0.453488
Gtf2a2	0.811128	0.397	0.24	1.23988e-06	2.84388e-07	3.44702e-09	3.04446e-08	5.90662	0.371212	0.261538	0.526087	0.285088	0.209302
Cst7	0.838904	0.436	0.25	1.24505e-06	4.81917e-08	7.86369e-11	2.78354e-10	5.90481	0.378788	0.353846	0.53913	0.29386	0.22093
Dock4	1.2034	0.226	0.091	1.26406e-06	2.71468e-07	5.11107e-10	1.78453e-09	5.89823	0.257576	0.128205	0.291304	0.0877193	0.0930233
Usp8	0.849222	0.404	0.243	1.27468e-06	3.80042e-07	2.60177e-09	1.31431e-08	5.8946	0.424242	0.287179	0.491304	0.285088	0.215116
Synpo2	1.37537	0.206	0.086	1.27808e-06	4.75581e-07	6.71314e-09	2.2844e-08	5.89344	0.272727	0.102564	0.256522	0.118421	0.0639535
Utp11	0.975874	0.332	0.164	1.28025e-06	7.66369e-07	8.99506e-11	3.83136e-10	5.89271	0.401515	0.230769	0.378261	0.20614	0.136628
Pip4k2a	0.592699	0.704	0.514	1.28714e-06	7.28982e-08	4.0617e-11	6.15619e-11	5.89037	0.765152	0.564103	0.778261	0.574561	0.473837
Zzef1	0.706356	0.504	0.344	1.29763e-06	4.84591e-07	4.74848e-09	1.78172e-08	5.88685	0.575758	0.410256	0.543478	0.377193	0.322674
Pin4	-0.437195	0.666	0.724	1.30562e-06	2.97407e-07	4.721e-07	2.62086e-09	5.88418	0.568182	0.810256	0.573913	0.714912	0.729651
Gimap5	0.908944	0.433	0.252	1.30993e-06	1.21997e-07	3.70633e-11	2.49058e-10	5.88275	0.583333	0.266667	0.486957	0.280702	0.232558
Cant1	-0.41595	0.63	0.654	1.31412e-06	5.89103e-08	0.000521332	3.72139e-08	5.88137	0.659091	0.620513	0.626087	0.657895	0.651163
Khdrbs3	0.959864	0.237	0.122	1.32175e-06	3.36257e-07	5.1755e-07	2.79002e-06	5.87885	0.242424	0.14359	0.313043	0.144737	0.107558
Itgam	0.864619	0.289	0.159	1.33395e-06	5.49014e-08	2.40062e-07	8.96506e-07	5.87486	0.181818	0.261538	0.373913	0.192982	0.136628
Kcnj8	0.753538	0.395	0.245	1.33656e-06	9.33515e-08	3.3053e-08	2.4242e-07	5.87401	0.401515	0.287179	0.482609	0.232456	0.252907
Zdhhc17	1.02398	0.287	0.149	1.33912e-06	5.29107e-07	1.25059e-08	5.96238e-08	5.87318	0.325758	0.241026	0.304348	0.162281	0.139535
Cblb	0.835759	0.445	0.292	1.34023e-06	9.26412e-08	5.8562e-09	5.63069e-09	5.87282	0.583333	0.307692	0.482609	0.333333	0.264535
Wdr7	0.79652	0.395	0.219	1.35244e-06	6.0287e-07	5.23046e-10	5.79466e-10	5.86888	0.401515	0.379487	0.404348	0.254386	0.194767
Eif1ad	0.726838	0.47	0.281	1.35519e-06	3.92732e-07	1.58841e-10	3.94154e-10	5.868	0.492424	0.482051	0.447826	0.333333	0.247093
Fam117b	0.859741	0.364	0.201	1.36032e-06	5.6557e-07	1.22426e-09	6.78937e-09	5.86636	0.454545	0.282051	0.382609	0.219298	0.188953
Tbc1d4	1.1258	0.241	0.108	1.36056e-06	8.8596e-07	6.41878e-09	2.35495e-08	5.86628	0.371212	0.164103	0.230435	0.0964912	0.116279
Banf1	-0.348756	0.964	0.991	1.36232e-06	3.78363e-07	3.40495e-14	7.10246e-14	5.86572	0.901515	0.984615	0.952174	0.986842	0.994186
Ttc39b	0.843651	0.438	0.267	1.4093e-06	2.76355e-07	8.08366e-10	3.69214e-09	5.851	0.5	0.297436	0.521739	0.311404	0.238372
Cand1	0.737471	0.51	0.313	1.41344e-06	7.35123e-07	2.96069e-11	1.0959e-10	5.84972	0.583333	0.45641	0.517391	0.372807	0.273256
Tbl1x	0.732351	0.456	0.281	1.42639e-06	1.94334e-07	8.95777e-10	6.5451e-09	5.84576	0.598485	0.405128	0.417391	0.328947	0.25
Pa2g4	-0.302002	0.993	1	1.42799e-06	1.53889e-07	2.97661e-13	9.43552e-13	5.84527	0.94697	0.994872	0.986957	1	1
Col4a3bp	-0.395599	0.768	0.822	1.42901e-06	4.6894e-08	4.12191e-07	8.65956e-08	5.84496	0.810606	0.8	0.7	0.811404	0.828488
Fzr1	0.207692	0.607	0.535	1.43047e-06	5.96581e-08	0.0331285	0.0506912	5.84452	0.44697	0.825641	0.513043	0.530702	0.537791
Nxpe4	0.763103	0.244	0.14	1.4667e-06	8.97716e-07	1.01821e-05	4.07621e-05	5.83366	0.189394	0.276923	0.247826	0.122807	0.151163
Tubb6	-0.448422	0.422	0.421	1.47907e-06	2.67379e-08	0.140305	6.19672e-09	5.83001	0.462121	0.369231	0.443478	0.438596	0.409884
Cdc73	1.04506	0.305	0.157	1.48511e-06	1.01243e-06	2.12807e-09	9.81425e-09	5.82824	0.356061	0.215385	0.352174	0.241228	0.101744
Ifih1	1.25293	0.183	0.082	1.491e-06	4.04419e-07	4.43491e-07	1.45449e-06	5.82652	0.166667	0.158974	0.213043	0.0789474	0.0843023
Fbxo4	0.987712	0.314	0.166	1.51053e-06	5.73587e-07	4.33199e-09	2.26924e-08	5.82087	0.356061	0.210256	0.378261	0.201754	0.142442
Ankrd13a	0.25713	0.964	0.955	1.54003e-06	5.15008e-07	1.16657e-07	1.18432e-07	5.81247	0.924242	0.94359	0.973913	0.964912	0.947674
Fmod	-1.02794	0.163	0.177	1.54582e-06	7.61683e-14	0.314718	4.28485e-06	5.81084	0.204545	0.0871795	0.204348	0.118421	0.215116
Itgav	1.16451	0.284	0.133	1.5511e-06	4.58046e-07	4.40331e-10	1.98271e-09	5.80936	0.378788	0.0923077	0.391304	0.162281	0.113372
Bax	-0.289448	0.876	0.913	1.55553e-06	8.76173e-08	8.084e-06	1.98852e-05	5.80812	0.833333	0.892308	0.856522	0.925439	0.90407
Limd2	0.538411	0.98	0.981	1.5631e-06	2.788e-26	9.84067e-10	6.72528e-10	5.80601	0.931818	0.94359	1	0.97807	0.982558
Dctn6	0.676212	0.463	0.292	1.60581e-06	4.28745e-07	8.77824e-09	1.99443e-08	5.7943	0.477273	0.476923	0.443478	0.311404	0.27907
Kif4	0.583334	0.264	0.18	1.62857e-06	1.56602e-06	0.000682574	0.00284599	5.78819	0.121212	0.405128	0.226087	0.192982	0.171512
Snrnp200	0.459349	0.777	0.631	1.63893e-06	1.495e-07	2.1483e-09	9.49441e-09	5.78544	0.863636	0.738462	0.743478	0.653509	0.616279
Prdm1	0.929813	0.35	0.198	1.64833e-06	4.94916e-07	2.94062e-09	1.77712e-08	5.78296	0.287879	0.246154	0.473913	0.289474	0.136628
Kxd1	0.605038	0.645	0.437	1.67241e-06	2.18143e-07	1.99633e-11	1.54682e-11	5.77666	0.742424	0.584615	0.643478	0.438596	0.436047
Mast3	0.798156	0.46	0.299	1.68336e-06	1.24036e-07	3.50019e-09	1.28674e-08	5.77382	0.560606	0.333333	0.508696	0.385965	0.241279
Mid1ip1	0.648132	0.411	0.257	1.69634e-06	7.25952e-07	9.77935e-08	2.31669e-07	5.77049	0.378788	0.461538	0.386957	0.285088	0.238372
Golm1	0.476752	0.553	0.402	1.69982e-06	1.96491e-07	1.31056e-06	2.40763e-06	5.7696	0.55303	0.589744	0.526087	0.412281	0.395349
Odf2	-0.444412	0.871	0.965	1.70181e-06	1.41691e-06	1.97635e-15	6.61641e-16	5.76909	0.780303	0.953846	0.804348	0.95614	0.97093
Entr1	-0.383998	0.736	0.804	1.70709e-06	1.77956e-07	5.56496e-08	6.63095e-08	5.76774	0.742424	0.830769	0.630435	0.802632	0.805233
Pnpla8	0.834268	0.393	0.227	1.71442e-06	1.01144e-06	1.29434e-09	8.62223e-09	5.76588	0.462121	0.307692	0.426087	0.280702	0.19186
Baz1a	-0.273606	0.792	0.794	1.71523e-06	1.33325e-07	0.00220715	3.19637e-05	5.76568	0.765152	0.815385	0.752174	0.807018	0.784884
Serbp1	0.195742	1	1	1.72477e-06	4.96363e-09	4.20569e-07	3.811e-06	5.76327	0.962121	1	1	1	1
Alcam	0.960616	0.348	0.187	1.72935e-06	5.06757e-08	1.00845e-09	5.38883e-09	5.76212	0.363636	0.251282	0.421739	0.192982	0.18314
Wdyhv1	0.865698	0.343	0.198	1.72967e-06	1.13663e-06	1.7465e-08	1.11314e-07	5.76204	0.363636	0.307692	0.36087	0.25	0.162791
Gabpb1	0.801577	0.425	0.253	1.75939e-06	1.20606e-06	7.55775e-10	4.8278e-09	5.75464	0.484848	0.369231	0.43913	0.320175	0.209302
Icam2	0.94884	0.348	0.17	1.76938e-06	2.12506e-07	3.37511e-11	2.0833e-11	5.75218	0.522727	0.235897	0.343478	0.197368	0.151163
Gga1	0.780763	0.454	0.269	1.77457e-06	4.39487e-07	2.16319e-10	6.539e-10	5.75091	0.530303	0.364103	0.486957	0.311404	0.241279
Mpnd	1.14839	0.26	0.124	1.78829e-06	1.24323e-06	4.76072e-09	2.04912e-08	5.74756	0.325758	0.133333	0.330435	0.144737	0.110465
Btbd35f2	0.511203	0.571	0.409	1.78916e-06	6.37865e-08	1.90401e-07	3.33709e-07	5.74735	0.69697	0.610256	0.465217	0.416667	0.40407
Anks1	0.799889	0.32	0.189	1.8149e-06	9.36661e-07	3.24429e-07	2.04846e-06	5.74115	0.318182	0.297436	0.33913	0.20614	0.177326
Clec12a	0.540838	0.548	0.376	1.8261e-06	1.22889e-08	1.23446e-07	4.62967e-08	5.73848	0.393939	0.574359	0.617391	0.390351	0.366279
1700020L24Rik	1.05139	0.178	0.086	1.8272e-06	1.29572e-06	4.72574e-06	2.31122e-05	5.73821	0.136364	0.205128	0.178261	0.0833333	0.0872093
Arhgef12	0.303413	0.582	0.465	1.83557e-06	5.9815e-08	0.000284017	0.000442293	5.73623	0.537879	0.682051	0.526087	0.438596	0.482558
Scn1b	0.95995	0.296	0.15	1.86471e-06	1.0647e-06	5.57714e-09	2.23479e-08	5.72939	0.30303	0.220513	0.356522	0.171053	0.136628
Trp53rka	0.949801	0.332	0.182	1.8783e-06	8.46925e-07	3.06078e-09	1.86266e-08	5.72623	0.469697	0.225641	0.343478	0.201754	0.168605
Ndufa2	-0.226155	0.966	0.99	1.88187e-06	6.59135e-08	1.64301e-05	1.87641e-05	5.72541	0.94697	0.979487	0.956522	0.986842	0.991279
Cnn3	0.687203	0.591	0.39	1.88509e-06	1.49098e-08	7.87052e-12	4.20873e-11	5.72467	0.772727	0.45641	0.6	0.434211	0.360465
Tmed7	0.632071	0.596	0.376	1.89276e-06	1.33868e-06	1.00143e-11	8.61105e-13	5.7229	0.674242	0.451282	0.673913	0.447368	0.328488
Hist1h4i	-0.673317	0.479	0.598	1.89708e-06	7.13763e-07	1.23537e-08	1.80062e-10	5.72191	0.295455	0.707692	0.391304	0.631579	0.575581
Mydgf	0.627844	0.564	0.381	1.90102e-06	1.48368e-06	8.55679e-10	3.25624e-09	5.72101	0.537879	0.482051	0.647826	0.447368	0.337209
Hbq1b	0.175841	0.409	0.397	1.91968e-06	3.71466e-10	0.61474	0.566612	5.71677	0.189394	0.712821	0.278261	0.333333	0.438953
Snu13	-0.409637	0.898	0.951	1.92304e-06	7.58904e-07	2.49406e-13	8.72593e-13	5.71601	0.772727	0.969231	0.86087	0.947368	0.953488
Rpa1	0.52105	0.582	0.42	1.92983e-06	1.54891e-07	4.29743e-08	2.17099e-07	5.71448	0.545455	0.6	0.586957	0.469298	0.386628
Traf4	-0.762256	0.372	0.497	1.95809e-06	3.35016e-07	5.74421e-08	6.05923e-10	5.70817	0.318182	0.548718	0.252174	0.45614	0.523256
Chd2	0.708189	0.594	0.392	1.96117e-06	5.36172e-08	2.09196e-11	3.2484e-11	5.70749	0.734848	0.446154	0.63913	0.385965	0.395349
Exosc4	0.920981	0.338	0.187	1.99239e-06	1.45427e-06	6.88805e-09	3.50696e-08	5.70062	0.416667	0.292308	0.330435	0.214912	0.168605
Krcc1	0.929962	0.37	0.213	2.00102e-06	5.89673e-07	3.10691e-09	1.19149e-08	5.69875	0.431818	0.271795	0.417391	0.285088	0.165698
4931406C07Rik	1.1059	0.226	0.114	2.00378e-06	7.70491e-07	3.08211e-07	8.58675e-07	5.69815	0.265152	0.153846	0.265217	0.122807	0.107558
BC028528	-0.407073	0.42	0.456	2.01822e-06	7.72776e-08	0.019953	5.22911e-05	5.69503	0.454545	0.379487	0.434783	0.495614	0.430233
Gnb1	0.418559	0.882	0.757	2.04101e-06	7.9595e-08	7.08546e-09	2.98723e-09	5.69016	0.856061	0.810256	0.930435	0.780702	0.741279
Fam129c	0.925051	0.397	0.247	2.05812e-06	1.63274e-08	7.64916e-09	9.26236e-09	5.68653	0.659091	0.220513	0.395652	0.25	0.244186
Timeless	0.993944	0.208	0.1	2.0771e-06	1.64799e-06	5.15008e-07	1.60415e-06	5.68254	0.159091	0.189744	0.252174	0.105263	0.0959302
Rnpepl1	0.568259	0.607	0.418	2.08115e-06	4.73106e-07	6.98407e-10	1.30294e-09	5.6817	0.69697	0.558974	0.595652	0.407895	0.424419
AW549877	0.803234	0.49	0.32	2.08409e-06	8.20721e-08	2.28648e-10	9.2066e-10	5.68108	0.689394	0.328205	0.513043	0.421053	0.252907
Sfrp2	-1.58681	0.072	0.124	2.08717e-06	1.37589e-16	0.00184352	9.70334e-05	5.68044	0.0606061	0.0923077	0.0608696	0.0570175	0.168605
Tmem268	0.913793	0.361	0.192	2.10132e-06	2.09669e-06	3.5341e-10	1.52726e-09	5.67751	0.378788	0.261538	0.434783	0.232456	0.165698
Rab6b	1.05201	0.296	0.147	2.12926e-06	3.85595e-07	1.40184e-09	7.75717e-09	5.67177	0.431818	0.189744	0.308696	0.135965	0.15407
Ephx1	0.778635	0.544	0.364	2.13383e-06	6.03627e-08	2.89797e-11	1.52306e-10	5.67084	0.674242	0.328205	0.652174	0.337719	0.380814
Zfp553	1.16096	0.219	0.101	2.14005e-06	2.13813e-06	5.4294e-08	2.14691e-07	5.66958	0.265152	0.194872	0.213043	0.100877	0.101744
Resf1	0.488261	0.637	0.453	2.14229e-06	2.39359e-07	4.13712e-09	3.38136e-09	5.66912	0.75	0.646154	0.569565	0.5	0.421512
Itga6	0.514686	0.625	0.481	2.14569e-06	1.44127e-09	1.58473e-06	2.89894e-06	5.66843	0.727273	0.533333	0.643478	0.464912	0.491279
Dgke	1.16822	0.226	0.101	2.15014e-06	7.43382e-07	1.33717e-08	7.12381e-08	5.66753	0.30303	0.133333	0.26087	0.118421	0.0901163
Vav3	1.27712	0.185	0.077	2.16565e-06	9.60173e-07	7.69164e-08	3.44709e-07	5.66441	0.189394	0.14359	0.217391	0.0964912	0.0639535
Stk17b	0.548215	0.865	0.815	2.16569e-06	9.21203e-11	4.26601e-09	6.55443e-10	5.6644	0.886364	0.712821	0.930435	0.833333	0.802326
P4hb	0.570989	0.731	0.514	2.16646e-06	2.76202e-07	8.4898e-13	2.218e-13	5.66425	0.772727	0.579487	0.826087	0.552632	0.488372
Pot1a	0.980457	0.259	0.131	2.18178e-06	9.07581e-07	7.22598e-08	3.58857e-07	5.66119	0.242424	0.251282	0.273913	0.144737	0.122093
Sdf2l1	-0.331272	0.833	0.862	2.18698e-06	8.41304e-09	9.61253e-06	5.43868e-06	5.66016	0.568182	0.887179	0.895652	0.894737	0.840116
Kynu	1.1348	0.269	0.145	2.19089e-06	8.66567e-07	5.56369e-08	1.07023e-08	5.65938	0.325758	0.169231	0.321739	0.223684	0.0930233
Chrac1	0.549591	0.706	0.503	2.21761e-06	1.83287e-07	2.24518e-10	2.19761e-11	5.65411	0.75	0.635897	0.734783	0.548246	0.473837
Pim3	0.870393	0.402	0.238	2.23943e-06	5.24414e-08	3.76581e-09	1.45828e-08	5.64986	0.515152	0.317949	0.408696	0.285088	0.206395
Pdxdc1	0.779251	0.469	0.262	2.2611e-06	6.45095e-07	4.3493e-12	3.28248e-12	5.64568	0.55303	0.379487	0.495652	0.372807	0.188953
Tollip	0.688703	0.458	0.299	2.26708e-06	5.8081e-07	1.97591e-08	1.26474e-07	5.64453	0.492424	0.364103	0.517391	0.333333	0.276163
Rere	0.630367	0.727	0.542	2.27354e-06	4.76238e-08	1.80775e-12	8.54599e-12	5.6433	0.840909	0.466667	0.856522	0.583333	0.514535
Ncoa3	1.11807	0.268	0.129	2.27804e-06	9.81851e-07	3.52845e-09	1.83141e-08	5.64244	0.371212	0.123077	0.330435	0.179825	0.0959302
Irak3	0.820057	0.348	0.201	2.28916e-06	5.03316e-07	2.27042e-08	1.61151e-07	5.64032	0.333333	0.394872	0.317391	0.267544	0.156977
Slc22a23	0.389314	0.375	0.281	2.3168e-06	2.10256e-07	0.000907999	0.00351362	5.63511	0.310606	0.523077	0.286957	0.27193	0.287791
Gpr183	0.751526	0.573	0.418	2.35033e-06	1.56551e-08	5.89896e-10	3.61187e-10	5.62887	0.772727	0.405128	0.6	0.438596	0.40407
Osbpl5	0.841001	0.397	0.243	2.35384e-06	7.89734e-07	4.65307e-09	1.86459e-08	5.62822	0.462121	0.235897	0.495652	0.276316	0.22093
Galnt2	0.752717	0.42	0.288	2.35595e-06	6.38188e-07	4.94448e-07	3.07001e-07	5.62783	0.537879	0.276923	0.473913	0.368421	0.235465
Itsn1	0.720162	0.325	0.205	2.39214e-06	4.75793e-07	4.61484e-06	2.16829e-05	5.62121	0.265152	0.323077	0.36087	0.201754	0.206395
Cadm4	0.817048	0.273	0.15	2.3924e-06	4.98799e-07	8.42701e-07	2.0813e-06	5.62117	0.25	0.241026	0.313043	0.140351	0.156977
Micos13	0.429444	0.849	0.719	2.42244e-06	5.31834e-07	5.73738e-09	5.60734e-09	5.61575	0.825758	0.794872	0.891304	0.719298	0.718023
Adgrf5	1.34319	0.192	0.075	2.43179e-06	7.21196e-07	9.14548e-09	3.35763e-08	5.61407	0.212121	0.0974359	0.26087	0.0921053	0.0639535
Ugp2	0.884167	0.37	0.219	2.44994e-06	1.84011e-06	9.56951e-09	3.35733e-08	5.61084	0.44697	0.25641	0.421739	0.236842	0.206395
Ppp2r5b	-0.655351	0.655	0.834	2.45135e-06	4.91125e-06	1.0206e-16	5.67964e-16	5.61059	0.537879	0.85641	0.526087	0.754386	0.886628
Psat1	-0.444566	0.645	0.703	2.45279e-06	8.35083e-08	1.33928e-06	1.46819e-08	5.61034	0.492424	0.846154	0.547826	0.745614	0.674419
Slc9a6	0.953091	0.341	0.182	2.4802e-06	2.47713e-06	6.72669e-10	4.59083e-09	5.60551	0.393939	0.266667	0.373913	0.210526	0.162791
Rb1cc1	0.839434	0.354	0.189	2.49334e-06	2.49009e-06	1.17561e-09	1.77351e-09	5.60322	0.409091	0.302564	0.365217	0.214912	0.171512
Ppm1h	0.871078	0.391	0.219	2.49734e-06	6.71696e-07	3.0713e-10	1.68794e-09	5.60252	0.5	0.348718	0.365217	0.245614	0.200581
Usp21	0.608525	0.458	0.302	2.4977e-06	1.46113e-06	1.29671e-07	4.78873e-07	5.60246	0.44697	0.410256	0.504348	0.29386	0.30814
Naa15	-0.379682	0.84	0.914	2.50423e-06	4.61236e-07	9.50705e-10	2.43017e-09	5.60133	0.742424	0.948718	0.765217	0.921053	0.909884
Hint3	-0.39441	0.582	0.633	2.53208e-06	3.48721e-07	0.000441093	8.1038e-06	5.59652	0.621212	0.610256	0.534783	0.631579	0.633721
Ffar2	-0.428539	0.449	0.477	2.53648e-06	1.47393e-08	0.0323877	3.69167e-05	5.59577	0.348485	0.45641	0.504348	0.508772	0.456395
Orm1	1.49992	0.16	0.084	2.53675e-06	1.15357e-10	6.8659e-05	3.77538e-05	5.59572	0.234848	0.169231	0.108696	0.100877	0.0726744
Man2c1	-0.391096	0.698	0.743	2.55056e-06	3.27795e-07	6.45495e-06	1.28655e-07	5.59336	0.719697	0.758974	0.617391	0.701754	0.770349
Rasgrp3	1.10738	0.294	0.143	2.55747e-06	1.27741e-06	5.43222e-10	3.04412e-09	5.59219	0.25	0.153846	0.43913	0.223684	0.0901163
Dmxl1	0.506186	0.74	0.605	2.56104e-06	2.24169e-07	2.12573e-08	3.63178e-08	5.59158	0.871212	0.646154	0.730435	0.614035	0.598837
Selenbp1	0.818771	0.221	0.129	2.56978e-06	1.42998e-06	3.94008e-05	0.00018075	5.5901	0.189394	0.194872	0.26087	0.114035	0.139535
Mcpt8	0.923568	0.185	0.114	2.57448e-06	1.07707e-08	0.000628763	0.00131013	5.58931	0.0833333	0.251282	0.186957	0.122807	0.107558
Naa30	0.977456	0.334	0.159	2.57868e-06	1.21714e-06	2.71977e-11	2.83482e-11	5.5886	0.484848	0.225641	0.33913	0.192982	0.136628
Inpp5d	-0.158082	0.835	0.811	2.57982e-06	2.64863e-07	0.106367	0.00202013	5.58841	0.80303	0.794872	0.843478	0.828947	0.799419
Sirt7	-0.349252	0.828	0.855	2.60901e-06	1.8607e-07	4.14674e-07	7.47098e-08	5.58352	0.80303	0.887179	0.756522	0.850877	0.857558
Ube2n	1.2034	0.223	0.1	2.64383e-06	1.18595e-06	1.69428e-08	8.48367e-08	5.57777	0.280303	0.189744	0.217391	0.162281	0.0581395
Cd63	-0.510768	0.551	0.561	2.65364e-06	4.76371e-11	0.0155026	1.0396e-07	5.57616	0.454545	0.625641	0.543478	0.600877	0.534884
Tnfsf13	0.968328	0.271	0.135	2.65413e-06	8.1634e-07	1.55394e-08	6.11113e-08	5.57608	0.19697	0.220513	0.356522	0.144737	0.127907
A4galt	0.964337	0.26	0.133	2.67221e-06	1.19826e-06	6.57246e-08	3.92187e-07	5.57313	0.310606	0.220513	0.265217	0.179825	0.101744
Mlxip	0.731737	0.544	0.365	2.67289e-06	4.30414e-07	8.42401e-10	2.02577e-09	5.57302	0.689394	0.389744	0.591304	0.434211	0.319767
Zfp236	0.899063	0.372	0.213	2.6803e-06	1.80483e-07	1.89241e-09	1.25593e-08	5.57182	0.409091	0.251282	0.452174	0.22807	0.203488
Tex2	0.521506	0.485	0.337	2.69207e-06	4.18385e-07	1.3941e-06	3.0087e-06	5.56991	0.5	0.574359	0.4	0.364035	0.319767
Tspan14	0.770716	0.433	0.257	2.71912e-06	1.53786e-06	2.92419e-10	2.96477e-09	5.56557	0.5	0.364103	0.452174	0.328947	0.209302
Cops5	0.488085	0.666	0.474	2.72606e-06	4.19773e-07	2.52653e-09	4.94565e-10	5.56446	0.674242	0.697436	0.634783	0.539474	0.430233
Taf10	0.545174	0.654	0.451	2.72822e-06	6.33607e-07	4.72956e-10	5.88465e-11	5.56412	0.689394	0.615385	0.669565	0.486842	0.427326
Phf21a	1.03152	0.32	0.157	2.74282e-06	2.73901e-06	1.69647e-10	9.08646e-10	5.5618	0.431818	0.205128	0.352174	0.210526	0.122093
Sp140	-0.48507	0.485	0.561	2.77131e-06	1.69267e-07	6.16889e-05	1.49989e-06	5.55732	0.636364	0.507692	0.378261	0.609649	0.52907
Ltv1	0.765717	0.359	0.217	2.82043e-06	1.92038e-06	1.15838e-07	6.5827e-07	5.54968	0.378788	0.4	0.313043	0.324561	0.145349
Fbxw7	0.884167	0.37	0.201	2.88971e-06	1.58848e-06	3.74956e-10	2.12237e-09	5.53915	0.431818	0.25641	0.430435	0.27193	0.15407
Zadh2	0.917804	0.334	0.192	2.89895e-06	1.06268e-06	2.47864e-08	9.96291e-08	5.53776	0.431818	0.25641	0.343478	0.236842	0.162791
Pik3ap1	-0.18692	0.731	0.733	2.90585e-06	1.17686e-09	0.116954	0.0363906	5.53673	0.825758	0.594872	0.765217	0.802632	0.686047
Psma3	0.487347	0.779	0.615	2.91185e-06	5.0025e-07	1.55841e-09	1.14685e-09	5.53583	0.840909	0.682051	0.813043	0.697368	0.561047
Stat6	0.644059	0.655	0.456	2.91402e-06	2.36083e-07	8.95397e-12	2.58283e-11	5.53551	0.848485	0.482051	0.682609	0.460526	0.453488
Slc29a1	0.755495	0.314	0.192	2.92834e-06	1.31571e-06	1.56775e-06	9.64262e-06	5.53338	0.287879	0.297436	0.343478	0.219298	0.174419
Trappc12	0.639788	0.578	0.392	2.96863e-06	3.87318e-07	7.13212e-10	1.56329e-09	5.52744	0.704545	0.435897	0.626087	0.447368	0.354651
Amfr	0.41861	0.767	0.601	3.00614e-06	5.90436e-07	4.88052e-08	9.64281e-09	5.52199	0.848485	0.687179	0.782609	0.574561	0.619186
Map2k1	-0.23396	0.803	0.797	3.02198e-06	4.4148e-08	0.0142546	0.000389407	5.51971	0.825758	0.8	0.76087	0.811404	0.787791
Akt2	0.681306	0.503	0.318	3.0261e-06	3.71164e-07	1.99774e-09	2.07745e-09	5.51912	0.583333	0.471795	0.482609	0.385965	0.273256
Epc2	0.666369	0.512	0.325	3.07013e-06	1.38986e-06	8.29446e-10	1.50135e-09	5.51284	0.568182	0.45641	0.526087	0.359649	0.302326
Pip4p1	0.771864	0.503	0.295	3.11025e-06	7.82531e-07	2.72755e-12	8.13084e-12	5.50721	0.628788	0.338462	0.569565	0.333333	0.270349
Rbmx	-0.354975	0.623	0.664	3.12691e-06	2.28023e-06	0.000183679	1.03906e-06	5.50489	0.666667	0.620513	0.591304	0.675439	0.656977
Gp6	0.978959	0.172	0.096	3.20416e-06	6.31441e-07	0.000127337	0.00027138	5.49429	0.128788	0.179487	0.191304	0.105263	0.0901163
D10Wsu102e	0.85889	0.399	0.227	3.2207e-06	7.31517e-07	9.77545e-10	3.30465e-09	5.49205	0.484848	0.282051	0.447826	0.263158	0.203488
Nampt	0.961925	0.339	0.182	3.24671e-06	2.62681e-06	1.29896e-09	7.08866e-09	5.48856	0.401515	0.169231	0.447826	0.263158	0.127907
Ncapd3	0.735193	0.294	0.18	3.25053e-06	1.13916e-06	5.79136e-06	3.14091e-05	5.48805	0.265152	0.312821	0.295652	0.192982	0.171512
Gtf2ird1	0.974612	0.233	0.117	3.2796e-06	1.0501e-06	2.96724e-07	1.47374e-06	5.48418	0.204545	0.225641	0.256522	0.0964912	0.130814
Dlgap5	0.291245	0.607	0.517	3.28339e-06	6.77965e-09	0.00166662	0.00649904	5.48368	0.356061	0.794872	0.582609	0.578947	0.476744
Trmt2b	0.921824	0.305	0.171	3.33945e-06	1.55844e-06	7.14872e-08	3.24396e-07	5.47632	0.371212	0.271795	0.295652	0.214912	0.142442
Lrrc8c	0.930278	0.284	0.149	3.35445e-06	3.34852e-06	3.87263e-08	2.02165e-07	5.47438	0.295455	0.2	0.347826	0.153509	0.145349
Gpr18	1.00155	0.352	0.182	3.35467e-06	6.56875e-07	8.30859e-11	5.12991e-10	5.47435	0.507576	0.210256	0.382609	0.219298	0.156977
Sfxn3	0.865698	0.33	0.185	3.39685e-06	7.20601e-07	2.66229e-08	1.42685e-07	5.46892	0.348485	0.317949	0.330435	0.131579	0.22093
Stk4	0.748831	0.537	0.346	3.41822e-06	1.42303e-07	1.25133e-10	3.53768e-10	5.4662	0.689394	0.379487	0.582609	0.421053	0.296512
Efl1	0.89664	0.377	0.205	3.44964e-06	9.53375e-07	1.9061e-10	1.08767e-09	5.46223	0.477273	0.251282	0.426087	0.232456	0.186047
Arap3	0.813906	0.291	0.168	3.46147e-06	9.13561e-07	7.89061e-07	4.60922e-06	5.46074	0.25	0.205128	0.386957	0.179825	0.159884
Hnrnph3	-0.33744	0.783	0.806	3.46767e-06	3.21616e-07	3.85486e-05	9.55235e-07	5.45996	0.742424	0.805128	0.76087	0.767544	0.831395
Atp1b3	0.512081	0.837	0.729	3.46949e-06	8.39353e-09	9.11247e-08	3.63833e-08	5.45973	0.893939	0.784615	0.834783	0.758772	0.709302
Dusp1	0.796783	0.293	0.175	3.47049e-06	1.15805e-06	2.37749e-06	1.20159e-05	5.45961	0.310606	0.338462	0.243478	0.219298	0.145349
Nfrkb	0.901919	0.332	0.199	3.49151e-06	2.72805e-06	9.66186e-08	9.43435e-08	5.45699	0.454545	0.266667	0.317391	0.22807	0.180233
Nsmce4a	-0.468474	0.79	0.883	3.49849e-06	1.9509e-07	2.07033e-10	5.76791e-10	5.45612	0.621212	0.887179	0.752174	0.842105	0.909884
Dera	0.710763	0.422	0.257	3.53773e-06	2.1682e-06	1.3761e-08	3.16382e-08	5.45127	0.386364	0.466667	0.404348	0.27193	0.247093
Cwc15	1.01005	0.302	0.154	3.55366e-06	3.35573e-06	2.33546e-09	1.48051e-08	5.44932	0.310606	0.2	0.382609	0.22807	0.104651
Nqo1	0.506117	0.296	0.189	3.56396e-06	1.45464e-06	7.77024e-05	1.76221e-05	5.44807	0.166667	0.430769	0.256522	0.171053	0.200581
Abcb7	0.898732	0.276	0.15	3.56742e-06	1.16832e-06	2.03128e-07	1.21412e-06	5.44765	0.272727	0.261538	0.291304	0.162281	0.142442
Ndst1	-0.292546	0.72	0.724	3.61806e-06	2.11326e-08	0.00632713	2.78977e-05	5.44152	0.734848	0.738462	0.678261	0.785088	0.68314
Fam169b	0.914555	0.425	0.269	3.67162e-06	6.61572e-08	2.62448e-09	3.9324e-09	5.43514	0.628788	0.302564	0.413043	0.342105	0.22093
Mau2	0.576808	0.654	0.484	3.69207e-06	2.39372e-07	1.60894e-09	5.76984e-09	5.43273	0.734848	0.517949	0.713043	0.539474	0.447674
Fbxo7	0.353273	0.607	0.463	3.73619e-06	3.90259e-07	1.05143e-05	7.49177e-06	5.42757	0.492424	0.646154	0.63913	0.407895	0.5
Rap2c	0.788111	0.377	0.227	3.77785e-06	2.97267e-06	3.32107e-08	1.84339e-07	5.42276	0.409091	0.307692	0.417391	0.276316	0.194767
Ttll12	0.472387	0.39	0.288	3.7806e-06	3.96524e-08	0.000375569	0.00144138	5.42244	0.272727	0.523077	0.343478	0.276316	0.296512
Smc3	0.36439	0.643	0.5	3.81575e-06	2.80516e-07	2.70369e-05	7.48178e-06	5.41842	0.651515	0.758974	0.53913	0.451754	0.531977
Park7	-0.345284	0.934	0.955	3.82139e-06	1.17096e-06	7.29732e-11	9.41295e-10	5.41778	0.878788	0.953846	0.921739	0.947368	0.959302
Cacybp	-0.4435	0.625	0.678	3.85717e-06	7.25314e-07	7.40992e-06	1.05488e-08	5.41373	0.606061	0.764103	0.513043	0.679825	0.677326
Strap	0.42329	0.684	0.531	3.86409e-06	3.68952e-07	3.25804e-07	5.86781e-07	5.41295	0.659091	0.728205	0.652174	0.574561	0.502907
Il16	0.484281	0.849	0.755	3.90741e-06	1.89262e-07	1.35242e-08	1.93449e-08	5.40811	0.901515	0.702564	0.917391	0.79386	0.729651
Got1	-0.429846	0.555	0.608	3.92775e-06	1.22128e-07	0.000249166	1.75621e-06	5.40586	0.515152	0.630769	0.504348	0.657895	0.575581
Pex19	0.967948	0.239	0.126	4.03826e-06	1.45246e-06	7.47528e-07	3.92172e-06	5.39381	0.265152	0.246154	0.217391	0.140351	0.116279
Xcr1	-0.639734	0.208	0.294	4.0494e-06	7.3316e-07	0.000536586	0.000785431	5.39261	0.159091	0.210256	0.234783	0.324561	0.273256
Slc45a3	0.719269	0.289	0.164	4.0614e-06	4.319e-07	1.00358e-06	1.96528e-06	5.39132	0.227273	0.261538	0.347826	0.166667	0.162791
Tgfbr2	0.596402	0.756	0.607	4.11667e-06	2.58666e-08	1.15573e-11	5.18532e-11	5.38545	0.901515	0.538462	0.843478	0.578947	0.625
Tmem56	0.247116	0.386	0.309	4.12736e-06	7.19164e-08	0.0141365	0.0171437	5.38433	0.181818	0.702564	0.234783	0.311404	0.30814
Sox6	0.385357	0.354	0.287	4.13851e-06	2.3723e-07	0.0092504	0.0274059	5.38316	0.242424	0.528205	0.269565	0.280702	0.290698
Pold1	0.699	0.422	0.267	4.21664e-06	1.44488e-06	4.67562e-08	2.57089e-07	5.37503	0.55303	0.369231	0.391304	0.315789	0.235465
Inpp5a	0.752494	0.354	0.201	4.22438e-06	7.15227e-07	2.19385e-08	4.81602e-08	5.37424	0.44697	0.333333	0.317391	0.232456	0.180233
Glb1	0.803006	0.442	0.24	4.24202e-06	1.35306e-06	7.91591e-12	2.83098e-12	5.37243	0.530303	0.271795	0.534783	0.254386	0.229651
Mios	0.808856	0.338	0.191	4.28794e-06	2.00365e-06	2.33539e-08	1.29825e-07	5.36775	0.356061	0.328205	0.334783	0.25	0.151163
Lyar	0.593465	0.436	0.308	4.30866e-06	1.17071e-06	2.6634e-06	1.5161e-05	5.36566	0.371212	0.487179	0.430435	0.364035	0.270349
Fam53a	0.88178	0.355	0.199	4.30957e-06	3.11762e-06	2.36318e-09	1.87703e-08	5.36557	0.462121	0.266667	0.369565	0.241228	0.171512
Snupn	0.899733	0.338	0.18	4.32005e-06	1.55061e-06	2.26501e-09	9.41189e-09	5.36451	0.356061	0.312821	0.347826	0.22807	0.148256
Acss2	0.567344	0.478	0.411	4.3337e-06	2.69825e-09	0.0268958	0.016293	5.36314	0.628788	0.507692	0.365217	0.403509	0.415698
Sh2d1a	1.17282	0.262	0.119	4.33732e-06	9.2928e-07	7.25989e-10	4.16149e-09	5.36278	0.371212	0.174359	0.273913	0.131579	0.110465
Trim11	-0.308742	0.795	0.848	4.33846e-06	5.21991e-07	2.28986e-06	5.98648e-06	5.36266	0.825758	0.805128	0.743478	0.811404	0.872093
Ebna1bp2	-0.358998	0.935	0.976	4.36056e-06	8.82954e-07	6.58533e-12	4.83582e-11	5.36046	0.848485	0.979487	0.9	0.986842	0.968023
Abraxas2	1.21117	0.199	0.082	4.36766e-06	3.24628e-06	1.65838e-08	6.00067e-08	5.35975	0.272727	0.112821	0.230435	0.0877193	0.0784884
Gdf6	0.94401	0.228	0.126	4.38437e-06	3.87689e-06	4.55049e-06	1.2144e-05	5.35809	0.234848	0.14359	0.295652	0.127193	0.125
Card11	0.770565	0.553	0.369	4.39047e-06	1.00178e-07	9.33499e-11	3.27095e-10	5.35749	0.69697	0.358974	0.63913	0.438596	0.322674
St5	-0.696231	0.533	0.622	4.41882e-06	8.49444e-08	1.4696e-08	2.85902e-13	5.35469	0.530303	0.625641	0.452174	0.539474	0.677326
Tab2	0.503784	0.648	0.488	4.44432e-06	4.41534e-07	4.79429e-08	1.33296e-07	5.35219	0.689394	0.615385	0.656522	0.464912	0.502907
Nfkbib	-0.319176	0.794	0.83	4.45055e-06	3.49752e-07	3.55514e-05	2.37852e-05	5.35159	0.772727	0.85641	0.734783	0.820175	0.837209
Cdon	1.26461	0.199	0.079	4.48351e-06	3.94507e-06	5.69356e-09	1.5092e-08	5.34838	0.272727	0.179487	0.173913	0.0921053	0.0697674
Btbd1	-0.52497	0.467	0.519	4.49657e-06	3.26185e-07	0.000632025	2.64587e-08	5.34712	0.5	0.579487	0.352174	0.539474	0.505814
Cenpb	0.330374	0.847	0.684	4.49814e-06	4.92353e-07	5.79842e-07	4.82305e-10	5.34697	0.795455	0.861538	0.843478	0.640351	0.712209
Atraid	0.991688	0.303	0.156	4.51106e-06	1.74679e-06	3.27344e-09	1.88747e-08	5.34572	0.310606	0.215385	0.373913	0.210526	0.119186
Gdi1	0.360815	0.899	0.785	4.54605e-06	6.21329e-07	8.55212e-08	1.83958e-08	5.34237	0.94697	0.861538	0.895652	0.785088	0.784884
Pml	0.480002	0.822	0.636	4.54879e-06	3.85375e-07	1.86366e-11	1.96637e-12	5.3421	0.848485	0.702564	0.882609	0.679825	0.607558
Vps33a	0.974207	0.309	0.166	4.58056e-06	2.05004e-06	9.8489e-09	5.31705e-08	5.33908	0.378788	0.194872	0.365217	0.184211	0.15407
Tmem33	0.764656	0.327	0.208	4.62621e-06	3.23799e-06	2.99127e-06	8.01785e-06	5.33477	0.280303	0.302564	0.373913	0.241228	0.186047
Mus81	0.747628	0.438	0.255	4.64678e-06	1.58517e-06	3.1913e-10	6.96203e-10	5.33285	0.44697	0.389744	0.473913	0.320175	0.212209
Col5a1	-0.929953	0.215	0.212	4.66613e-06	8.95452e-14	0.65471	1.33632e-07	5.33104	0.25	0.179487	0.226087	0.140351	0.258721
Ubr1	0.660971	0.497	0.343	4.73423e-06	3.83448e-06	3.31117e-08	1.43498e-07	5.32475	0.568182	0.410256	0.530435	0.385965	0.313953
Ppil2	1.00106	0.28	0.149	4.77105e-06	2.74275e-06	5.88226e-08	2.41431e-07	5.32139	0.318182	0.225641	0.304348	0.192982	0.119186
Dnajc11	0.425126	0.553	0.397	4.78954e-06	3.89585e-07	3.81042e-06	5.85857e-07	5.31971	0.44697	0.697436	0.491304	0.425439	0.377907
Znrf2	0.631928	0.623	0.414	4.79147e-06	5.15308e-07	1.31245e-11	1.40196e-11	5.31953	0.75	0.533333	0.630435	0.508772	0.351744
Setd2	-0.270658	0.885	0.9	4.83325e-06	2.41884e-06	7.43754e-06	3.61111e-06	5.31576	0.886364	0.907692	0.821739	0.885965	0.909884
Cd69	1.14711	0.26	0.122	4.83981e-06	2.82838e-06	3.13167e-09	1.56884e-08	5.31517	0.356061	0.169231	0.282609	0.188596	0.0784884
Adat2	0.952946	0.248	0.135	4.84721e-06	3.00067e-06	8.95517e-07	3.70161e-06	5.31451	0.166667	0.297436	0.252174	0.162281	0.116279
Kif13a	0.863504	0.262	0.14	4.86033e-06	4.85314e-06	4.2634e-07	1.31575e-06	5.31333	0.287879	0.251282	0.256522	0.166667	0.122093
Retreg1	1.1817	0.232	0.101	4.87916e-06	4.86545e-06	4.51337e-09	2.1528e-08	5.31166	0.287879	0.138462	0.278261	0.127193	0.0843023
Traj34	1.37888	0.228	0.108	4.8959e-06	2.54263e-08	4.66158e-08	6.1493e-08	5.31017	0.333333	0.112821	0.265217	0.166667	0.0697674
Alox5	0.785572	0.203	0.119	4.90679e-06	5.67269e-07	0.000128715	0.000574191	5.3092	0.0606061	0.261538	0.234783	0.157895	0.0930233
Traj40	1.10705	0.3	0.161	4.90733e-06	4.51313e-07	1.35364e-08	3.39367e-08	5.30915	0.424242	0.164103	0.343478	0.223684	0.119186
Gypa	-0.168495	0.759	0.792	4.91108e-06	2.01904e-10	0.0187644	0.0485609	5.30882	0.44697	0.928205	0.734783	0.688596	0.860465
Tppp3	0.851059	0.255	0.164	4.94857e-06	1.72052e-07	9.4323e-05	0.000103739	5.30552	0.257576	0.292308	0.221739	0.127193	0.188953
Hjurp	0.435721	0.722	0.551	4.98583e-06	1.14887e-06	8.39596e-08	1.35378e-08	5.30226	0.69697	0.692308	0.747826	0.649123	0.485465
Casp2	0.39625	0.727	0.573	5.03952e-06	1.04426e-06	1.75553e-07	2.34252e-07	5.29761	0.765152	0.702564	0.713043	0.578947	0.569767
Ehd3	0.65701	0.496	0.336	5.1207e-06	2.75692e-07	2.71673e-08	1.41357e-07	5.29067	0.560606	0.430769	0.513043	0.359649	0.319767
Jaml	-0.795304	0.162	0.259	5.13362e-06	2.4489e-06	3.67814e-05	7.40717e-05	5.28958	0.151515	0.246154	0.0956522	0.29386	0.235465
Hyou1	0.790582	0.49	0.295	5.14603e-06	1.79381e-07	3.12815e-11	1.14932e-10	5.28853	0.522727	0.302564	0.630435	0.381579	0.238372
Erh	-0.339158	0.953	0.991	5.24437e-06	1.93961e-06	1.09702e-13	1.58593e-13	5.28031	0.848485	0.979487	0.934783	0.986842	0.994186
Xrn1	0.884367	0.386	0.219	5.32858e-06	1.76909e-06	8.01375e-10	4.43947e-09	5.27339	0.545455	0.220513	0.434783	0.241228	0.203488
Amotl1	1.01449	0.305	0.171	5.42895e-06	1.75545e-07	7.20785e-08	2.12091e-07	5.26528	0.386364	0.215385	0.334783	0.122807	0.203488
R3hdm1	0.767441	0.409	0.252	5.4759e-06	1.72093e-06	2.47336e-08	9.51267e-08	5.26154	0.462121	0.307692	0.465217	0.324561	0.203488
Cib2	0.779333	0.323	0.205	5.47611e-06	5.59232e-07	4.4188e-06	1.82062e-05	5.26153	0.295455	0.394872	0.278261	0.223684	0.19186
Gnl1	-0.321235	0.662	0.729	5.4868e-06	1.00412e-06	3.65721e-05	6.39034e-05	5.26068	0.681818	0.687179	0.613043	0.732456	0.726744
Timm23	-0.359308	0.864	0.935	5.49154e-06	4.03418e-07	1.87944e-09	4.5234e-09	5.26031	0.825758	0.953846	0.786957	0.934211	0.936047
Nt5e	1.0536	0.269	0.142	5.50477e-06	1.74043e-06	7.16776e-08	2.20733e-07	5.25926	0.227273	0.179487	0.369565	0.149123	0.136628
Aagab	0.660453	0.472	0.302	5.59109e-06	2.76509e-06	5.25847e-09	2.99931e-08	5.2525	0.492424	0.379487	0.53913	0.280702	0.31686
Cplane1	0.879908	0.334	0.191	5.59882e-06	5.59082e-06	2.48004e-08	1.31515e-07	5.2519	0.378788	0.25641	0.373913	0.214912	0.174419
Zdhhc18	0.61932	0.706	0.544	5.63062e-06	8.72705e-08	4.96698e-10	9.64478e-10	5.24944	0.848485	0.533333	0.747826	0.596491	0.508721
Trappc5	0.711118	0.479	0.311	5.72005e-06	3.48063e-06	3.62373e-09	2.0457e-08	5.2426	0.583333	0.364103	0.517391	0.320175	0.305233
Akap1	0.798511	0.271	0.164	5.74994e-06	1.48962e-06	7.67249e-06	3.41231e-05	5.24034	0.242424	0.364103	0.208696	0.175439	0.156977
Atp2b4	0.313741	0.408	0.318	5.75262e-06	4.43394e-07	0.00286411	0.00676708	5.24013	0.265152	0.630769	0.3	0.280702	0.343023
Cfp	0.267741	0.971	0.944	5.81311e-06	4.19124e-09	1.92835e-07	1.96738e-06	5.23559	0.893939	0.958974	0.991304	0.925439	0.956395
Fchsd2	-0.165712	0.677	0.71	5.81861e-06	1.497e-07	0.0277262	0.0764202	5.23518	0.818182	0.564103	0.665217	0.763158	0.674419
Slc25a21	0.78027	0.156	0.089	5.84735e-06	4.8082e-06	0.000635192	0.00245753	5.23304	0.0909091	0.220513	0.13913	0.0614035	0.107558
Abcd3	1.0697	0.269	0.129	5.85127e-06	1.69065e-06	4.6021e-09	2.18039e-08	5.23275	0.340909	0.184615	0.3	0.144737	0.119186
Mri1	-0.433212	0.731	0.797	5.85661e-06	1.02067e-06	3.23661e-07	6.96274e-08	5.23235	0.651515	0.851282	0.647826	0.758772	0.822674
Lamp2	0.583477	0.654	0.444	5.91676e-06	2.14899e-07	2.38789e-11	1.0346e-11	5.22792	0.719697	0.523077	0.721739	0.425439	0.456395
H2-Oa	0.961717	0.363	0.192	5.98576e-06	1.45975e-06	2.11985e-10	9.45691e-10	5.22288	0.454545	0.25641	0.4	0.245614	0.156977
Rsrc2	0.497769	0.706	0.544	5.99908e-06	1.32648e-06	1.00509e-08	2.21782e-08	5.22191	0.780303	0.646154	0.704348	0.614035	0.497093
Recql5	1.1114	0.241	0.119	6.06458e-06	3.75099e-06	7.10746e-08	2.60664e-07	5.2172	0.318182	0.138462	0.282609	0.162281	0.0901163
Cd3g	0.951297	0.522	0.365	6.07353e-06	1.17572e-13	8.76944e-10	5.65008e-10	5.21656	0.689394	0.302564	0.613043	0.45614	0.305233
Zbtb25	0.722525	0.438	0.278	6.12787e-06	3.41375e-06	1.5447e-08	8.27114e-08	5.21269	0.462121	0.430769	0.430435	0.324561	0.247093
Ftsj1	0.755938	0.242	0.135	6.179e-06	6.17095e-06	5.04444e-06	9.06411e-06	5.20908	0.204545	0.292308	0.221739	0.149123	0.125
Dnm2	0.440103	0.813	0.717	6.19037e-06	9.64684e-07	4.6029e-08	8.02561e-08	5.20828	0.871212	0.697436	0.86087	0.758772	0.688953
Znrf3	0.897162	0.303	0.171	6.19072e-06	1.89641e-06	1.28578e-07	6.80417e-07	5.20826	0.340909	0.235897	0.33913	0.188596	0.159884
Sh3pxd2b	-0.5443	0.298	0.372	6.22426e-06	4.60112e-07	0.0031859	0.00133003	5.20591	0.280303	0.302564	0.304348	0.412281	0.34593
Sik3	0.905444	0.338	0.185	6.22555e-06	6.2115e-06	4.21272e-09	2.81368e-08	5.20582	0.477273	0.251282	0.330435	0.245614	0.145349
Ralgapa2	0.752429	0.402	0.233	6.27546e-06	1.54227e-06	1.62571e-09	5.71757e-09	5.20235	0.575758	0.271795	0.413043	0.258772	0.215116
Sp1	0.462689	0.716	0.559	6.33503e-06	7.88616e-07	4.52948e-08	6.3585e-08	5.19825	0.765152	0.676923	0.713043	0.570175	0.552326
Eif4a3	0.455508	0.706	0.51	6.37003e-06	1.19141e-06	3.29758e-09	1.362e-10	5.19586	0.674242	0.702564	0.726087	0.495614	0.520349
Arl5c	1.08016	0.284	0.149	6.37218e-06	2.07457e-06	1.8579e-08	5.14661e-08	5.19571	0.439394	0.14359	0.313043	0.175439	0.130814
Cul4a	0.348678	0.496	0.395	6.40943e-06	2.89787e-06	0.000697153	0.00285436	5.19318	0.348485	0.65641	0.443478	0.412281	0.383721
Ergic2	0.726923	0.411	0.267	6.43004e-06	6.00275e-06	9.34714e-08	4.06906e-07	5.19179	0.462121	0.338462	0.443478	0.315789	0.235465
Kif5b	0.617495	0.628	0.414	6.44298e-06	6.91444e-07	5.93113e-11	4.60198e-12	5.19091	0.780303	0.487179	0.665217	0.47807	0.372093
Bcl3	0.799061	0.474	0.323	6.44758e-06	4.03449e-07	1.47615e-08	1.37506e-08	5.1906	0.606061	0.276923	0.569565	0.381579	0.284884
Atp6v1b2	0.804413	0.379	0.208	6.46812e-06	2.77387e-06	4.80946e-10	1.64104e-09	5.18922	0.44697	0.261538	0.43913	0.197368	0.215116
Ogt	0.496972	0.815	0.677	6.50438e-06	3.09323e-07	9.7645e-11	4.60294e-10	5.18679	0.886364	0.635897	0.904348	0.692982	0.665698
Cish	0.556958	0.329	0.229	6.53362e-06	6.11226e-08	0.000113373	0.000702749	5.18485	0.212121	0.615385	0.152174	0.311404	0.174419
Aebp1	-0.961662	0.226	0.234	6.63603e-06	5.56266e-18	0.383469	1.00172e-05	5.17809	0.242424	0.220513	0.221739	0.175439	0.273256
Celf2	0.63927	0.689	0.477	6.68338e-06	2.53421e-07	5.83295e-11	2.65293e-12	5.175	0.840909	0.492308	0.765217	0.495614	0.465116
Gpr132	0.87964	0.445	0.26	6.71301e-06	4.00797e-07	5.61115e-11	2.8391e-10	5.17308	0.666667	0.292308	0.447826	0.302632	0.232558
Dyrk1b	1.09804	0.235	0.101	6.79905e-06	3.97896e-06	3.40768e-09	3.36805e-09	5.16755	0.257576	0.164103	0.282609	0.131579	0.0813953
Ctla2b	0.773047	0.294	0.185	6.81832e-06	1.26746e-06	8.63091e-06	3.19724e-05	5.16632	0.325758	0.220513	0.33913	0.232456	0.15407
Pld3	0.845693	0.409	0.224	6.81939e-06	3.6388e-07	2.84391e-11	1.35453e-10	5.16625	0.378788	0.235897	0.573913	0.210526	0.232558
Smad2	-0.332584	0.666	0.741	6.83318e-06	6.38864e-07	6.08228e-05	0.000182548	5.16538	0.69697	0.707692	0.591304	0.754386	0.732558
Cdc42bpa	0.627476	0.271	0.178	6.89011e-06	6.88019e-06	0.000186617	0.000844393	5.16177	0.25	0.307692	0.252174	0.166667	0.186047
Ube2j2	0.451799	0.655	0.49	6.92981e-06	1.7012e-06	2.44096e-07	1.15511e-07	5.15928	0.636364	0.728205	0.604348	0.504386	0.479651
Zkscan1	0.86146	0.336	0.187	6.94075e-06	5.07363e-06	1.45245e-08	7.71545e-08	5.15859	0.393939	0.266667	0.36087	0.192982	0.18314
Tcta	0.826834	0.373	0.212	6.96686e-06	2.41897e-06	2.07998e-09	1.37498e-08	5.15696	0.454545	0.246154	0.434783	0.201754	0.218023
Ilvbl	0.86146	0.343	0.184	6.98161e-06	6.96172e-06	2.5603e-09	6.21026e-09	5.15604	0.371212	0.276923	0.382609	0.197368	0.174419
Trat1	1.44385	0.194	0.086	6.9829e-06	1.35743e-07	9.52885e-08	1.42205e-07	5.15596	0.378788	0.107692	0.16087	0.0921053	0.0813953
Rnf11	0.320868	0.645	0.463	7.02254e-06	6.90554e-07	1.34554e-06	5.1181e-10	5.15351	0.568182	0.661538	0.678261	0.47807	0.453488
Srgn	0.483123	0.871	0.755	7.13276e-06	1.18682e-07	3.06775e-12	4.24133e-11	5.14674	0.893939	0.717949	0.956522	0.798246	0.726744
Cep55	-0.753076	0.126	0.189	7.14962e-06	1.97495e-06	0.00219698	0.00116338	5.14572	0.128788	0.123077	0.126087	0.289474	0.122093
Dlg1	0.507334	0.702	0.498	7.17984e-06	2.95113e-06	4.31059e-10	2.05339e-11	5.14389	0.810606	0.605128	0.721739	0.47807	0.511628
Fermt2	1.07353	0.25	0.119	7.19042e-06	3.43214e-06	1.37894e-08	7.81233e-08	5.14325	0.439394	0.128205	0.243478	0.149123	0.0988372
Hps3	0.760602	0.449	0.264	7.24558e-06	1.59954e-06	5.1474e-11	5.57871e-10	5.13993	0.522727	0.364103	0.478261	0.328947	0.22093
Tuba1a	0.760205	0.569	0.36	7.39072e-06	1.00201e-07	1.00304e-11	9.65096e-12	5.13131	0.787879	0.338462	0.63913	0.381579	0.34593
Psmd1	0.78836	0.339	0.192	7.43729e-06	6.36014e-06	3.83296e-08	1.23792e-07	5.12859	0.325758	0.271795	0.404348	0.219298	0.174419
Mettl9	0.50019	0.585	0.43	7.45836e-06	8.13007e-07	1.54959e-07	7.55221e-07	5.12736	0.621212	0.605128	0.552174	0.482456	0.395349
Prdx5	0.32024	0.75	0.629	7.55868e-06	2.73951e-07	0.000271156	5.27521e-05	5.12155	0.712121	0.794872	0.721739	0.614035	0.639535
Tbxa2r	0.762703	0.364	0.217	7.63307e-06	1.45736e-06	5.94361e-08	2.82715e-07	5.1173	0.439394	0.230769	0.434783	0.188596	0.235465
Serinc1	0.604958	0.56	0.378	7.65089e-06	6.31783e-07	9.05618e-10	4.22199e-09	5.11629	0.628788	0.4	0.66087	0.377193	0.377907
Asph	0.626939	0.46	0.295	7.68608e-06	8.5256e-08	5.04121e-08	8.35303e-08	5.1143	0.492424	0.379487	0.508696	0.280702	0.305233
Ap2b1	0.518062	0.691	0.505	7.81852e-06	1.40117e-06	1.0535e-09	7.71492e-10	5.10688	0.75	0.620513	0.704348	0.552632	0.473837
Ssh2	0.518146	0.741	0.545	7.91592e-06	3.28869e-07	1.03104e-10	2.35713e-11	5.1015	0.787879	0.682051	0.756522	0.587719	0.517442
Bud13	0.881833	0.289	0.166	7.97079e-06	7.94482e-06	5.33446e-07	2.00658e-06	5.0985	0.348485	0.246154	0.291304	0.197368	0.145349
Cd209b	1.13962	0.276	0.135	8.00861e-06	1.35831e-08	2.61522e-09	1.49232e-08	5.09644	0.287879	0.210256	0.326087	0.192982	0.0959302
F2rl2	1.09537	0.178	0.087	8.06628e-06	2.99586e-07	6.55632e-06	2.98966e-05	5.09333	0.159091	0.128205	0.230435	0.114035	0.0697674
Col6a2	-0.753076	0.223	0.215	8.08432e-06	7.77889e-17	0.903663	0.000665109	5.09236	0.393939	0.153846	0.182609	0.157895	0.252907
Myd88	-0.288977	0.707	0.701	8.10118e-06	7.75488e-07	0.00873141	1.94113e-06	5.09145	0.757576	0.676923	0.691304	0.767544	0.656977
Gramd3	0.912141	0.395	0.243	8.11128e-06	8.56552e-07	6.72287e-09	1.21627e-08	5.09091	0.613636	0.220513	0.417391	0.298246	0.206395
Gpr174	1.12407	0.28	0.138	8.14765e-06	1.81474e-06	3.85897e-09	1.60557e-08	5.08897	0.462121	0.153846	0.282609	0.166667	0.119186
Tmc8	0.500413	0.56	0.406	8.17275e-06	1.97712e-06	2.28123e-07	1.03995e-06	5.08763	0.606061	0.523077	0.569565	0.438596	0.383721
Alas2	-0.683707	0.894	0.9	8.21548e-06	1.33006e-36	3.87326e-12	1.91104e-13	5.08537	0.666667	0.979487	0.917391	0.807018	0.962209
Cyc1	-0.395611	0.907	0.972	8.23404e-06	1.72546e-06	1.29508e-11	4.87595e-12	5.08439	0.80303	0.984615	0.869565	0.960526	0.979651
Ctsh	0.676312	0.716	0.558	8.23923e-06	1.1514e-09	4.21505e-11	1.26617e-10	5.08411	0.818182	0.430769	0.878261	0.578947	0.543605
Enox2	0.916776	0.285	0.147	8.24581e-06	8.23081e-06	2.10688e-08	7.64648e-08	5.08377	0.340909	0.230769	0.3	0.184211	0.122093
Aldh3b1	0.407098	0.659	0.497	8.25857e-06	8.0145e-07	1.98362e-07	2.15702e-07	5.0831	0.560606	0.625641	0.73913	0.464912	0.517442
Urod	-0.113133	0.853	0.846	8.27307e-06	2.67036e-09	0.056098	0.0331871	5.08233	0.742424	0.923077	0.821739	0.75	0.909884
Cpt1a	0.571557	0.576	0.402	8.27918e-06	3.4718e-07	2.36452e-09	1.79161e-08	5.08201	0.712121	0.502564	0.56087	0.342105	0.44186
Zc3h6	0.910582	0.321	0.163	8.37478e-06	3.87928e-06	1.04058e-09	1.87618e-09	5.07703	0.272727	0.297436	0.369565	0.184211	0.148256
Fbn1	-0.866615	0.199	0.206	8.40858e-06	7.7805e-13	0.456785	1.09917e-05	5.07528	0.310606	0.138462	0.186957	0.153509	0.241279
Shroom3	1.10972	0.226	0.094	8.43671e-06	3.34385e-06	3.47123e-09	1.33951e-09	5.07383	0.257576	0.123077	0.295652	0.0877193	0.0988372
Zbtb24	0.846972	0.373	0.229	8.48269e-06	2.79635e-06	3.68232e-08	1.22858e-07	5.07147	0.507576	0.287179	0.369565	0.263158	0.206395
Pex7	0.681016	0.411	0.274	8.49219e-06	4.13432e-06	5.55584e-07	2.62949e-06	5.07098	0.371212	0.394872	0.447826	0.342105	0.229651
Arel1	0.303379	0.837	0.72	8.59344e-06	6.87352e-06	1.91502e-05	4.70492e-06	5.06583	0.840909	0.794872	0.86087	0.675439	0.75
Lta4h	0.173177	0.919	0.851	8.67148e-06	1.87556e-09	0.0906819	0.00151606	5.06191	0.909091	0.917949	0.908696	0.828947	0.866279
Blzf1	0.933807	0.271	0.142	8.85325e-06	8.83858e-06	8.70609e-08	4.29652e-07	5.0529	0.310606	0.251282	0.265217	0.166667	0.125
Hace1	0.890492	0.219	0.119	8.85417e-06	5.99838e-06	6.05791e-06	3.42109e-05	5.05285	0.280303	0.210256	0.191304	0.157895	0.0930233
Abi1	0.549615	0.659	0.519	8.90501e-06	1.52466e-06	7.76953e-08	1.3498e-07	5.05037	0.765152	0.512821	0.713043	0.517544	0.520349
Cpsf1	0.745361	0.39	0.266	8.98717e-06	2.50984e-06	1.97464e-06	1.88375e-06	5.04638	0.439394	0.348718	0.395652	0.320175	0.229651
Arid5a	0.885221	0.35	0.206	8.9874e-06	3.62596e-06	2.4933e-08	9.6606e-08	5.04637	0.477273	0.2	0.404348	0.241228	0.18314
Gpi1	-0.13326	0.996	0.998	9.00862e-06	1.86357e-08	0.0128155	0.06498	5.04534	0.992424	1	0.991304	1	0.997093
Kri1	0.513991	0.628	0.474	9.03821e-06	6.1015e-06	7.08978e-08	2.70878e-07	5.04392	0.651515	0.589744	0.647826	0.508772	0.450581
Haus8	0.625011	0.49	0.336	9.05701e-06	6.29657e-07	2.09515e-07	6.18694e-07	5.04302	0.515152	0.471795	0.491304	0.315789	0.348837
Prdx6	0.393542	0.654	0.505	9.14786e-06	2.36831e-06	1.09381e-06	2.4179e-06	5.03868	0.628788	0.651282	0.665217	0.517544	0.497093
Tbk1	0.585211	0.601	0.385	9.26858e-06	2.56444e-06	9.78975e-11	1.36828e-12	5.03299	0.628788	0.564103	0.621739	0.451754	0.340116
Gpr141	0.775303	0.233	0.135	9.29143e-06	9.27875e-06	2.08008e-05	9.13622e-05	5.03192	0.212121	0.251282	0.230435	0.149123	0.125
Clk3	-0.376109	0.905	0.972	9.30019e-06	2.39666e-06	1.05677e-11	5.99906e-12	5.03151	0.856061	0.953846	0.843478	0.942982	0.991279
Tbxas1	0.420461	0.522	0.39	9.30769e-06	2.19121e-08	6.10529e-05	4.0347e-05	5.03116	0.401515	0.564103	0.556522	0.394737	0.386628
Prtn3	0.350184	0.555	0.502	9.36966e-06	6.51933e-40	0.271352	0.194173	5.02828	0.174242	0.794872	0.543478	0.451754	0.534884
Adssl1	0.571212	0.44	0.302	9.37362e-06	2.27114e-06	1.17613e-06	8.35744e-06	5.02809	0.356061	0.466667	0.465217	0.311404	0.296512
Nmral1	0.499533	0.425	0.292	9.3879e-06	5.31391e-06	8.03208e-06	1.33963e-05	5.02743	0.333333	0.471795	0.43913	0.311404	0.27907
Ptdss1	0.632805	0.585	0.388	9.41778e-06	3.36164e-06	1.29109e-10	2.09057e-10	5.02605	0.69697	0.451282	0.634783	0.434211	0.357558
Mmadhc	0.583101	0.517	0.341	9.52673e-06	3.76999e-06	1.28113e-08	1.48795e-08	5.02106	0.545455	0.507692	0.508696	0.407895	0.296512
Trim12c	0.72503	0.537	0.316	9.53538e-06	4.19378e-06	4.78703e-12	3.8859e-13	5.02066	0.719697	0.353846	0.591304	0.412281	0.252907
Tmem120b	0.768072	0.26	0.161	9.55979e-06	2.68262e-07	5.56496e-05	0.000208251	5.01955	0.257576	0.333333	0.2	0.157895	0.162791
Parp11	0.666723	0.478	0.313	9.56765e-06	5.15144e-06	1.88725e-08	7.70634e-08	5.01919	0.606061	0.430769	0.443478	0.355263	0.284884
Csgalnact2	0.412546	0.612	0.472	9.68415e-06	1.30201e-06	4.58593e-06	1.11639e-05	5.01394	0.507576	0.712821	0.591304	0.47807	0.468023
Gfap	0.426263	0.187	0.136	9.93661e-06	7.78566e-06	0.0212553	0.0697112	5.00276	0.0530303	0.358974	0.117391	0.0789474	0.174419
Ttc39a	-0.813909	0.167	0.257	1.00115e-05	3.69982e-07	0.000129983	0.000158765	4.9995	0.159091	0.235897	0.113043	0.276316	0.244186
Cd33	0.693009	0.424	0.25	1.00443e-05	2.14157e-06	2.53842e-09	3.14189e-09	4.99808	0.310606	0.471795	0.447826	0.302632	0.215116
Tsn	0.469388	0.645	0.476	1.00667e-05	1.5741e-06	8.87398e-08	6.69831e-08	4.99711	0.628788	0.635897	0.656522	0.526316	0.44186
Exosc10	0.74748	0.406	0.255	1.00894e-05	1.00773e-05	3.14213e-08	1.86122e-07	4.99613	0.401515	0.34359	0.46087	0.315789	0.215116
Il1b	0.996759	0.251	0.124	1.0095e-05	2.01009e-06	6.12433e-08	2.28163e-07	4.99589	0.25	0.148718	0.33913	0.105263	0.136628
Zfp366	-0.601619	0.248	0.329	1.01341e-05	2.27517e-06	0.001136	0.000517436	4.99422	0.333333	0.220513	0.221739	0.385965	0.290698
Nr2c2ap	0.766741	0.406	0.227	1.02562e-05	7.03705e-06	3.66298e-10	5.37706e-10	4.98902	0.424242	0.358974	0.434783	0.285088	0.188953
Morf4l1	-0.461233	0.749	0.858	1.04029e-05	1.88895e-06	6.68168e-11	4.96362e-10	4.98285	0.598485	0.912821	0.682609	0.855263	0.860465
Hspa5	0.344563	0.998	0.995	1.04318e-05	9.9449e-12	5.8688e-13	4.61475e-11	4.98164	1	0.994872	1	0.995614	0.994186
Nr1h3	0.634842	0.557	0.383	1.05743e-05	1.77234e-06	9.63709e-09	1.97109e-08	4.97575	0.568182	0.405128	0.678261	0.416667	0.360465
Ddx31	0.857766	0.305	0.191	1.05759e-05	9.92919e-06	2.80061e-06	1.32493e-06	4.97568	0.333333	0.276923	0.313043	0.219298	0.171512
Afg3l2	0.764163	0.323	0.191	1.0577e-05	9.4318e-06	4.65773e-07	2.00087e-06	4.97564	0.325758	0.333333	0.313043	0.223684	0.168605
Mccc2	0.82911	0.266	0.157	1.06153e-05	8.92663e-06	6.44013e-06	2.49759e-05	4.97407	0.242424	0.317949	0.234783	0.175439	0.145349
Slc24a5	0.968629	0.149	0.077	1.06494e-05	1.87203e-06	0.000126543	0.000573804	4.97267	0.151515	0.169231	0.130435	0.0833333	0.0726744
Ppig	-0.269197	0.908	0.911	1.07232e-05	5.04236e-06	9.792e-06	1.85241e-06	4.96968	0.787879	0.923077	0.913043	0.925439	0.901163
Ptger3	0.917322	0.208	0.133	1.07468e-05	6.08303e-07	0.000592277	0.000695854	4.96872	0.219697	0.282051	0.13913	0.118421	0.142442
Gbp8	0.835845	0.329	0.178	1.08196e-05	5.528e-06	1.1943e-08	3.13484e-08	4.96579	0.401515	0.271795	0.334783	0.22807	0.145349
Glyr1	0.70903	0.492	0.304	1.08614e-05	4.82519e-06	5.08239e-10	8.26474e-10	4.96412	0.575758	0.405128	0.517391	0.359649	0.267442
Ntn4	1.15808	0.174	0.079	1.08837e-05	4.47476e-06	1.31257e-06	6.40001e-06	4.96322	0.25	0.128205	0.169565	0.0877193	0.0726744
Inafm2	0.87964	0.242	0.143	1.09751e-05	2.43806e-06	1.42773e-05	3.29142e-05	4.95959	0.318182	0.251282	0.191304	0.140351	0.145349
Tspan32	0.419787	0.761	0.64	1.10048e-05	6.4927e-07	1.25898e-07	6.56278e-07	4.95842	0.795455	0.748718	0.730435	0.640351	0.639535
Aldh9a1	0.842518	0.316	0.192	1.11505e-05	3.95388e-06	1.04201e-06	3.23669e-06	4.95271	0.371212	0.2	0.382609	0.214912	0.177326
Mtrr	0.765319	0.336	0.215	1.11691e-05	5.73969e-06	2.42359e-06	6.36126e-06	4.95198	0.363636	0.328205	0.326087	0.29386	0.162791
Irf3	-0.2235	0.826	0.825	1.1213e-05	2.68036e-06	0.00161302	6.11053e-05	4.95028	0.810606	0.820513	0.8	0.833333	0.819767
Enpp4	0.535457	0.537	0.371	1.1249e-05	2.88448e-06	1.06373e-07	1.37377e-07	4.94889	0.621212	0.497436	0.521739	0.368421	0.372093
B3gnt2	0.803492	0.451	0.264	1.12816e-05	2.61678e-06	1.75715e-10	4.03301e-10	4.94763	0.522727	0.287179	0.547826	0.315789	0.229651
Igfbp5	1.13255	0.321	0.171	1.13687e-05	3.12001e-10	7.26478e-09	2.08846e-08	4.94429	0.568182	0.251282	0.23913	0.192982	0.156977
Mapk3	0.511034	0.566	0.42	1.14617e-05	1.16547e-06	2.54613e-07	2.0215e-06	4.94075	0.606061	0.54359	0.56087	0.372807	0.450581
Ahr	1.14598	0.23	0.11	1.15547e-05	6.7278e-06	6.30802e-08	2.57782e-07	4.93724	0.287879	0.0974359	0.308696	0.135965	0.0930233
Gsn	1.03834	0.445	0.341	1.15672e-05	3.37719e-18	0.00137433	0.000621749	4.93677	0.537879	0.389744	0.43913	0.320175	0.354651
Atp5g3	-0.249093	0.991	0.993	1.15808e-05	2.28334e-07	9.21519e-10	3.28413e-08	4.93626	0.992424	1	0.982609	0.991228	0.994186
Tmem199	-0.463543	0.558	0.663	1.15878e-05	5.36758e-07	2.10353e-06	3.86113e-06	4.936	0.568182	0.646154	0.469565	0.675439	0.65407
Rmdn3	-0.65326	0.53	0.631	1.16653e-05	1.91536e-06	9.71268e-09	2.97106e-11	4.9331	0.393939	0.74359	0.421739	0.644737	0.622093
Cpne2	0.486651	0.399	0.273	1.17063e-05	8.25633e-07	1.7777e-05	3.22161e-05	4.93158	0.219697	0.502564	0.413043	0.311404	0.247093
Ube2d2a	1.04599	0.269	0.142	1.17313e-05	8.26214e-06	5.9146e-08	1.72146e-07	4.93065	0.348485	0.179487	0.3	0.214912	0.0930233
Dmpk	1.09629	0.205	0.091	1.17669e-05	6.41026e-06	8.49637e-08	2.82614e-07	4.92934	0.310606	0.133333	0.204348	0.0921053	0.0901163
Atxn7l3	0.620069	0.524	0.346	1.18294e-05	1.62294e-06	3.15471e-09	1.02771e-08	4.92704	0.651515	0.441026	0.526087	0.337719	0.351744
Kctd14	0.969951	0.174	0.084	1.18605e-05	1.18482e-05	7.22228e-06	1.55784e-05	4.9259	0.113636	0.210256	0.178261	0.105263	0.0697674
Spta1	-0.152222	0.779	0.82	1.18837e-05	5.97384e-17	0.00284354	0.00434487	4.92505	0.424242	0.928205	0.791304	0.723684	0.883721
Stx4a	-0.24177	0.842	0.832	1.20299e-05	3.48466e-06	0.000463755	2.70599e-06	4.91974	0.893939	0.805128	0.817391	0.859649	0.813953
Tmem86a	0.737407	0.368	0.215	1.20404e-05	4.18951e-06	3.45678e-08	8.4114e-08	4.91936	0.356061	0.338462	0.4	0.232456	0.203488
Fah	1.6233	0.154	0.058	1.21047e-05	5.21748e-07	1.15356e-07	4.06437e-07	4.91704	0.143939	0.0666667	0.234783	0.0570175	0.0581395
Hps1	0.817569	0.357	0.201	1.21134e-05	4.54408e-06	6.93342e-09	3.04637e-08	4.91673	0.378788	0.287179	0.404348	0.267544	0.156977
Erbin	0.399534	0.907	0.818	1.22421e-05	5.78261e-06	1.00866e-09	4.04913e-09	4.91214	0.924242	0.805128	0.952174	0.877193	0.77907
Ppp3cc	0.846698	0.418	0.26	1.22711e-05	6.18428e-06	4.33107e-09	1.55079e-08	4.91112	0.560606	0.276923	0.456522	0.350877	0.200581
Map1lc3a	0.94276	0.287	0.164	1.22778e-05	6.86936e-07	6.79395e-07	2.47578e-06	4.91088	0.401515	0.241026	0.26087	0.171053	0.159884
Cflar	0.655009	0.594	0.395	1.23525e-05	5.53081e-07	1.56863e-10	1.28708e-10	4.90825	0.75	0.45641	0.621739	0.45614	0.354651
Zranb2	0.520977	0.587	0.414	1.2371e-05	2.4365e-06	8.56158e-09	3.74002e-08	4.9076	0.606061	0.574359	0.591304	0.47807	0.372093
Odr4	0.844251	0.354	0.201	1.25451e-05	4.83005e-06	1.0381e-08	5.92235e-08	4.90152	0.378788	0.25641	0.421739	0.25	0.168605
Fto	0.557816	0.557	0.376	1.25588e-05	3.68366e-06	1.59263e-08	7.89349e-09	4.90105	0.606061	0.497436	0.578261	0.416667	0.348837
Atf1	0.538325	0.553	0.378	1.26939e-05	1.12198e-06	6.0392e-08	2.24776e-08	4.89641	0.515152	0.533333	0.591304	0.438596	0.337209
Itpr2	0.906872	0.366	0.208	1.27886e-05	3.56817e-06	4.14467e-09	1.75225e-08	4.89318	0.454545	0.205128	0.452174	0.267544	0.168605
Cltc	0.140609	0.996	0.998	1.28559e-05	5.78244e-07	6.32086e-05	0.000400433	4.8909	0.992424	0.989744	1	1	0.997093
Helz	-0.358118	0.598	0.635	1.28965e-05	1.23804e-06	0.00239263	2.50132e-05	4.88953	0.590909	0.712821	0.491304	0.679825	0.604651
Pex3	0.893287	0.303	0.166	1.29504e-05	9.17648e-06	4.04848e-08	2.66003e-07	4.88772	0.295455	0.261538	0.343478	0.241228	0.116279
Ptar1	0.618669	0.425	0.274	1.29694e-05	7.30157e-06	3.27061e-07	6.16656e-07	4.88708	0.5	0.420513	0.386957	0.289474	0.264535
Dkc1	-0.381573	0.901	0.969	1.30575e-05	4.19395e-06	8.95212e-12	1.27038e-11	4.88414	0.810606	0.979487	0.834783	0.942982	0.985465
Chil1	0.459276	0.309	0.243	1.30982e-05	6.50259e-07	0.00730431	0.0153785	4.88279	0.128788	0.435897	0.304348	0.245614	0.241279
Bcorl1	0.575366	0.327	0.208	1.31064e-05	4.41235e-06	1.19331e-05	2.36472e-05	4.88252	0.318182	0.389744	0.278261	0.197368	0.215116
Eif4g1	-0.251215	0.993	0.995	1.31122e-05	3.50501e-06	9.44611e-12	7.05731e-10	4.88232	0.969697	1	0.986957	0.991228	0.997093
Dxo	0.795914	0.334	0.205	1.31705e-05	8.26014e-06	6.04351e-07	2.54856e-06	4.8804	0.378788	0.282051	0.352174	0.20614	0.203488
Irf7	0.577399	0.673	0.418	1.32089e-05	2.13637e-07	6.3053e-16	4.43706e-17	4.87913	0.765152	0.517949	0.747826	0.530702	0.343023
Cab39l	1.04846	0.223	0.115	1.32928e-05	1.23154e-05	9.57075e-07	2.26562e-06	4.87638	0.219697	0.164103	0.273913	0.162281	0.0843023
Traj18	0.946359	0.364	0.215	1.34024e-05	7.13537e-07	1.28102e-08	4.40929e-08	4.87282	0.515152	0.276923	0.352174	0.22807	0.206395
Ston2	1.13787	0.162	0.079	1.35255e-05	6.06812e-06	1.524e-05	4.3466e-05	4.86885	0.166667	0.128205	0.186957	0.114035	0.0552326
Acbd6	0.5397	0.589	0.435	1.35722e-05	7.28779e-06	1.62187e-07	4.86467e-07	4.86735	0.628788	0.558974	0.591304	0.495614	0.395349
Susd3	0.797019	0.42	0.287	1.35874e-05	2.52412e-06	1.23151e-07	6.25507e-08	4.86686	0.484848	0.323077	0.465217	0.346491	0.247093
Med1	0.688649	0.461	0.283	1.35963e-05	6.71762e-06	2.13965e-09	3.94437e-09	4.86658	0.545455	0.369231	0.491304	0.346491	0.241279
Rab9	0.654423	0.436	0.285	1.3632e-05	4.66861e-06	1.66975e-07	6.9218e-07	4.86544	0.44697	0.430769	0.434783	0.359649	0.235465
Bptf	-0.105246	0.917	0.972	1.37011e-05	1.62195e-07	0.0324223	0.000185757	4.86324	0.893939	0.876923	0.917391	0.97807	0.968023
Traj37	1.29132	0.201	0.087	1.38275e-05	4.92918e-06	4.50052e-08	1.85976e-07	4.85926	0.272727	0.138462	0.213043	0.105263	0.0755814
Slc1a3	1.35501	0.167	0.087	1.41027e-05	2.41902e-07	4.39228e-05	3.32288e-05	4.8507	0.272727	0.117949	0.147826	0.114035	0.0697674
Lmo4	0.479304	0.738	0.542	1.42338e-05	4.23271e-06	3.42408e-10	4.09456e-11	4.84668	0.810606	0.666667	0.747826	0.583333	0.514535
Chmp3	0.404609	0.765	0.624	1.42861e-05	3.46406e-06	4.17954e-07	4.42944e-07	4.84509	0.818182	0.733333	0.752174	0.644737	0.610465
Topbp1	0.320793	0.698	0.586	1.45144e-05	3.17265e-06	5.45317e-05	0.000191983	4.8382	0.598485	0.794872	0.669565	0.600877	0.575581
Sesn1	0.484007	0.777	0.605	1.4583e-05	1.24062e-06	2.31806e-09	5.8443e-10	4.83615	0.848485	0.748718	0.747826	0.622807	0.593023
Zmat5	0.90944	0.32	0.17	1.462e-05	1.42239e-05	4.63884e-09	2.72218e-08	4.83505	0.310606	0.246154	0.386957	0.22807	0.130814
Dbn1	-0.653145	0.259	0.336	1.46887e-05	1.3734e-06	0.000743203	1.43808e-05	4.83302	0.30303	0.323077	0.178261	0.328947	0.340116
Slu7	0.702821	0.44	0.267	1.47343e-05	1.30939e-05	2.25666e-09	9.31602e-09	4.83167	0.492424	0.379487	0.46087	0.337719	0.22093
Sf3a1	-0.251909	0.914	0.949	1.48928e-05	6.22308e-06	1.17597e-05	3.20556e-05	4.82702	0.818182	0.94359	0.891304	0.951754	0.947674
Ppie	0.712938	0.447	0.274	1.49624e-05	1.17933e-05	2.13365e-09	1.02929e-08	4.825	0.55303	0.353846	0.465217	0.337719	0.232558
Tacc1	-0.260917	0.944	0.972	1.49765e-05	2.05261e-06	6.89152e-07	7.09334e-06	4.82459	0.916667	0.964103	0.908696	0.97807	0.968023
Cd274	0.775303	0.494	0.288	1.5021e-05	8.17916e-07	1.1482e-11	1.13139e-11	4.8233	0.613636	0.317949	0.573913	0.298246	0.281977
Mvp	0.600068	0.551	0.355	1.50547e-05	3.71779e-06	3.0757e-10	2.39043e-10	4.82233	0.590909	0.528205	0.552174	0.381579	0.337209
Osbpl9	0.615001	0.691	0.462	1.51663e-05	7.09827e-07	1.22438e-12	4.06272e-14	4.81912	0.871212	0.476923	0.76087	0.491228	0.44186
Rbm38	0.260349	0.654	0.507	1.52823e-05	1.1975e-06	0.000274339	6.46156e-07	4.81581	0.575758	0.733333	0.626087	0.526316	0.494186
Letmd1	0.995777	0.259	0.121	1.5292e-05	7.2066e-06	6.54238e-09	8.5442e-09	4.81553	0.333333	0.174359	0.286957	0.162281	0.0930233
Akna	-0.127939	0.944	0.958	1.53236e-05	3.95835e-07	0.00350678	0.0221051	4.81464	0.886364	0.923077	0.934783	0.951754	0.962209
Ushbp1	0.928927	0.242	0.138	1.53829e-05	6.32353e-06	4.45407e-06	1.04698e-05	4.81296	0.310606	0.174359	0.26087	0.127193	0.145349
Cdkn2aipnl	-0.418726	0.573	0.605	1.5457e-05	9.78255e-07	0.00104244	1.56114e-07	4.81087	0.560606	0.682051	0.486957	0.653509	0.572674
Ppp2r5d	0.674747	0.424	0.264	1.55545e-05	7.41296e-06	2.3149e-08	1.04787e-07	4.80814	0.424242	0.420513	0.426087	0.267544	0.261628
Ash2l	0.589123	0.54	0.343	1.57516e-05	3.38045e-06	4.48566e-10	1.10994e-10	4.80267	0.477273	0.553846	0.569565	0.434211	0.281977
Camkk2	0.411147	0.63	0.479	1.57685e-05	1.86689e-06	5.45127e-06	2.04497e-06	4.80221	0.666667	0.641026	0.595652	0.526316	0.447674
Klrc1	1.28832	0.14	0.056	1.58419e-05	8.07676e-06	1.98912e-06	8.66499e-06	4.80019	0.151515	0.0820513	0.182609	0.0570175	0.0552326
Cnih4	0.699249	0.343	0.22	1.58461e-05	1.56887e-05	3.12739e-06	1.53966e-05	4.80008	0.310606	0.374359	0.334783	0.254386	0.197674
Irs2	0.326034	0.707	0.535	1.59063e-05	1.31301e-06	8.72288e-07	9.77206e-09	4.79843	0.689394	0.758974	0.669565	0.679825	0.438953
Rsrp1	0.303874	0.984	0.993	1.61814e-05	3.76495e-09	7.15184e-10	5.43295e-09	4.79098	0.962121	0.958974	0.995652	0.995614	0.991279
L3mbtl3	1.22782	0.19	0.094	1.62048e-05	9.93342e-06	2.03322e-06	4.76896e-07	4.79036	0.356061	0.0923077	0.178261	0.105263	0.0872093
Ocrl	0.947826	0.214	0.112	1.62364e-05	7.02743e-06	3.25785e-06	1.76937e-05	4.78951	0.242424	0.230769	0.182609	0.144737	0.0901163
Dr1	0.835424	0.338	0.199	1.63038e-05	5.63782e-06	1.00688e-07	5.72964e-07	4.78771	0.378788	0.251282	0.386957	0.27193	0.151163
Fam43a	0.757486	0.496	0.309	1.63959e-05	7.69294e-07	1.43482e-10	7.50184e-10	4.78527	0.636364	0.328205	0.556522	0.337719	0.290698
Ggnbp2	0.468866	0.659	0.448	1.65751e-05	3.90716e-06	9.05651e-10	2.88532e-12	4.78054	0.636364	0.666667	0.66087	0.486842	0.421512
Sun1	0.328508	0.558	0.435	1.66876e-05	3.34029e-06	0.000114505	0.000182315	4.77761	0.537879	0.666667	0.478261	0.394737	0.462209
Ank1	-0.124801	0.772	0.795	1.67809e-05	1.44038e-15	0.0106516	0.0112335	4.77519	0.431818	0.948718	0.752174	0.684211	0.869186
Senp3	-0.423381	0.702	0.74	1.6791e-05	2.557e-06	6.64495e-07	5.1028e-10	4.77492	0.613636	0.861538	0.604348	0.807018	0.694767
Ppp1ca	-0.14676	0.996	1	1.68674e-05	5.4188e-07	0.000182645	0.00301085	4.77295	0.969697	0.989744	1	1	1
Oxa1l	0.709274	0.451	0.299	1.7057e-05	4.83566e-06	4.38477e-08	2.24031e-07	4.7681	0.507576	0.384615	0.473913	0.311404	0.290698
Klf15	0.881098	0.23	0.138	1.72352e-05	2.07338e-06	5.49661e-05	0.000169714	4.76358	0.318182	0.25641	0.156522	0.175439	0.113372
Pdia5	-0.843342	0.206	0.287	1.72463e-05	2.87619e-06	0.000320168	3.93669e-07	4.7633	0.174242	0.241026	0.195652	0.298246	0.27907
Sf3a2	-0.37019	0.788	0.843	1.73069e-05	4.26842e-06	1.1939e-06	5.37585e-07	4.76178	0.734848	0.861538	0.721739	0.842105	0.843023
Babam1	0.536365	0.558	0.402	1.73101e-05	4.79096e-06	1.18924e-07	5.63837e-07	4.7617	0.621212	0.584615	0.5	0.425439	0.386628
Echs1	0.667847	0.476	0.343	1.74129e-05	2.66702e-07	2.62218e-06	5.16408e-06	4.75913	0.598485	0.430769	0.443478	0.390351	0.311047
Tle4	0.948396	0.26	0.14	1.74823e-05	1.60297e-05	2.94857e-07	1.51408e-06	4.7574	0.363636	0.164103	0.282609	0.162281	0.125
C1qtnf7	1.22737	0.178	0.08	1.75034e-05	1.19336e-05	8.61779e-07	2.75303e-06	4.75688	0.280303	0.0974359	0.186957	0.105263	0.0639535
Tomm6	-0.261263	0.969	0.99	1.79227e-05	1.30172e-06	3.96563e-08	2.60535e-07	4.7466	0.954545	0.979487	0.956522	0.982456	0.994186
Ccnk	0.857766	0.334	0.189	1.79338e-05	9.25464e-06	1.70614e-08	1.31284e-07	4.74633	0.356061	0.246154	0.395652	0.219298	0.168605
Emilin2	0.373941	0.384	0.281	1.80052e-05	9.48928e-07	0.000704543	0.000727632	4.7446	0.242424	0.461538	0.4	0.258772	0.296512
Tmem161b	0.91069	0.314	0.178	1.81115e-05	1.0871e-05	5.9297e-08	2.6823e-07	4.74205	0.409091	0.241026	0.321739	0.241228	0.136628
Klhl25	0.745887	0.282	0.163	1.82041e-05	1.81567e-05	2.11942e-06	6.1725e-06	4.73983	0.30303	0.302564	0.252174	0.175439	0.15407
Ccnj	0.932728	0.237	0.131	1.82322e-05	1.01084e-05	3.34885e-06	1.27283e-05	4.73916	0.325758	0.215385	0.204348	0.153509	0.116279
Brd7	0.54281	0.47	0.346	1.8261e-05	1.02291e-05	7.48834e-06	3.2086e-05	4.73848	0.492424	0.492308	0.43913	0.355263	0.340116
Mdc1	0.68933	0.28	0.17	1.82865e-05	6.25257e-06	1.0841e-05	4.38246e-05	4.73787	0.265152	0.34359	0.234783	0.162281	0.174419
Arhgap26	0.732659	0.515	0.327	1.83067e-05	1.01908e-06	4.91796e-10	8.36074e-10	4.73739	0.704545	0.353846	0.543478	0.390351	0.284884
Cyfip1	0.785951	0.372	0.22	1.8361e-05	8.66623e-06	2.69968e-08	1.43731e-07	4.7361	0.409091	0.261538	0.443478	0.263158	0.19186
Cd5l	0.289482	0.835	0.701	1.8419e-05	1.6718e-13	1.16746e-08	9.74468e-08	4.73473	0.636364	0.8	0.943478	0.596491	0.770349
Gramd1a	0.748055	0.506	0.351	1.84255e-05	1.48361e-07	1.68754e-08	3.06367e-08	4.73458	0.772727	0.333333	0.5	0.385965	0.328488
Trbv12-2	1.12976	0.262	0.154	1.8483e-05	5.57934e-07	2.86341e-06	8.41086e-07	4.73323	0.469697	0.169231	0.221739	0.171053	0.142442
Fam173a	-0.292999	0.865	0.874	1.84925e-05	1.97679e-06	5.66856e-06	5.78087e-07	4.733	0.757576	0.902564	0.852174	0.872807	0.875
Evi2a	-0.23225	0.639	0.635	1.85096e-05	1.16312e-06	0.125403	0.00101328	4.7326	0.583333	0.594872	0.695652	0.635965	0.633721
Cd48	0.655982	0.618	0.439	1.8874e-05	1.949e-06	3.73881e-10	1.32038e-09	4.72414	0.742424	0.394872	0.730435	0.451754	0.430233
Rapgef6	0.582224	0.578	0.421	1.92074e-05	1.79823e-06	4.80683e-08	1.99451e-07	4.71653	0.674242	0.584615	0.517391	0.508772	0.363372
Xpo1	0.677666	0.44	0.278	1.94663e-05	4.4902e-06	2.82659e-08	9.31244e-08	4.71072	0.462121	0.374359	0.482609	0.350877	0.229651
Def8	0.598743	0.35	0.21	1.9547e-05	8.21036e-06	5.19914e-07	1.77733e-07	4.70892	0.265152	0.425641	0.334783	0.20614	0.212209
Cdk17	0.565041	0.589	0.439	1.98019e-05	8.16904e-06	5.66261e-08	2.40292e-07	4.70329	0.681818	0.492308	0.617391	0.434211	0.44186
Gfra2	0.508302	0.528	0.386	1.99146e-05	1.728e-06	1.55843e-06	7.4216e-06	4.70083	0.537879	0.507692	0.543478	0.394737	0.380814
Tcf19	-0.64341	0.496	0.638	1.99498e-05	1.10853e-05	2.78804e-09	5.04821e-09	4.70006	0.363636	0.789744	0.313043	0.596491	0.665698
Usp38	-0.311664	0.736	0.731	2.00106e-05	2.63504e-06	0.00155789	1.54103e-07	4.69874	0.727273	0.758974	0.695652	0.798246	0.686047
Pus1	0.491997	0.583	0.441	2.00526e-05	3.95245e-06	1.02807e-06	4.03079e-06	4.69783	0.621212	0.579487	0.569565	0.47807	0.415698
Herc6	0.649484	0.391	0.252	2.01318e-05	8.74127e-06	4.18925e-07	2.87809e-06	4.69612	0.454545	0.384615	0.36087	0.307018	0.215116
Atp6v0b	0.439645	0.803	0.624	2.01937e-05	4.55729e-06	2.07074e-09	1.14024e-10	4.69478	0.856061	0.707692	0.83913	0.671053	0.593023
Sema3g	1.08463	0.151	0.073	2.02138e-05	1.34884e-05	3.12297e-05	0.000117544	4.69435	0.166667	0.153846	0.13913	0.0833333	0.0668605
Ndufs1	-0.442036	0.794	0.893	2.02761e-05	5.59834e-06	2.14285e-12	2.77521e-11	4.69301	0.757576	0.958974	0.652174	0.907895	0.883721
Itgbl1	-1.07885	0.102	0.142	2.03256e-05	4.00984e-08	0.0254904	7.60946e-05	4.69196	0.166667	0.0974359	0.0695652	0.0964912	0.171512
Id4	1.02684	0.194	0.096	2.05389e-05	8.82598e-06	2.9723e-06	1.5197e-05	4.68742	0.265152	0.123077	0.213043	0.118421	0.0813953
Cyb5r1	-0.463798	0.682	0.724	2.07582e-05	4.78331e-06	1.13951e-06	1.94928e-10	4.68281	0.575758	0.820513	0.613043	0.714912	0.729651
Tns2	1.06245	0.244	0.117	2.09216e-05	1.3105e-06	3.20296e-08	1.55002e-07	4.6794	0.363636	0.133333	0.269565	0.122807	0.113372
Dnajc4	0.78836	0.37	0.215	2.10163e-05	1.29301e-05	1.83791e-08	6.81526e-08	4.67744	0.469697	0.251282	0.413043	0.236842	0.200581
Itgal	0.660213	0.567	0.409	2.10689e-05	1.49492e-06	2.22122e-09	9.6783e-09	4.67636	0.651515	0.374359	0.691304	0.425439	0.398256
Vdac3	0.618841	0.411	0.297	2.11789e-05	7.632e-06	1.24318e-05	2.04233e-05	4.6741	0.416667	0.410256	0.408696	0.337719	0.270349
Cers2	-0.366093	0.734	0.769	2.1435e-05	2.75153e-06	1.95838e-05	5.32179e-07	4.66888	0.681818	0.789744	0.695652	0.807018	0.744186
Cct8	-0.28208	0.966	0.991	2.14365e-05	4.74439e-06	2.31192e-09	1.26203e-08	4.66885	0.901515	0.984615	0.93913	1	0.985465
Abcg2	0.407823	0.341	0.241	2.14978e-05	7.25704e-06	0.000383231	0.000589442	4.66761	0.272727	0.512821	0.234783	0.232456	0.247093
Foxo4	0.75823	0.282	0.177	2.15291e-05	6.95905e-06	2.12913e-05	8.47277e-05	4.66697	0.310606	0.297436	0.252174	0.184211	0.171512
Itgb1	0.469267	0.759	0.575	2.15997e-05	4.48043e-06	1.57767e-09	2.07375e-10	4.66555	0.840909	0.610256	0.826087	0.600877	0.55814
Nsun3	0.94907	0.221	0.115	2.16069e-05	1.5484e-05	1.93666e-06	1.06391e-05	4.66541	0.219697	0.220513	0.221739	0.166667	0.0813953
Pdk2	1.05695	0.226	0.117	2.16749e-05	6.88095e-06	8.87317e-07	3.1177e-06	4.66404	0.295455	0.164103	0.23913	0.122807	0.113372
Atp5l	-0.205081	0.917	0.935	2.17046e-05	2.20719e-06	7.9666e-05	0.000830764	4.66345	0.893939	0.907692	0.904348	0.934211	0.936047
Proser1	0.690415	0.388	0.236	2.18155e-05	1.22098e-05	8.06758e-08	2.15486e-07	4.66124	0.424242	0.364103	0.386957	0.29386	0.197674
Gucd1	0.47713	0.451	0.287	2.18865e-05	3.58498e-06	2.06681e-07	6.89261e-09	4.65982	0.545455	0.430769	0.413043	0.311404	0.270349
Rnf167	0.512615	0.691	0.5	2.19681e-05	3.85065e-06	3.84417e-10	3.03278e-10	4.65821	0.795455	0.584615	0.717391	0.526316	0.482558
Zer1	0.616354	0.567	0.388	2.19924e-05	3.31086e-06	2.44807e-09	7.39936e-09	4.65773	0.689394	0.45641	0.591304	0.412281	0.372093
Arl6ip6	0.585126	0.433	0.29	2.20527e-05	1.28133e-05	6.71761e-07	3.70296e-06	4.65654	0.431818	0.425641	0.43913	0.298246	0.284884
Zfp26	1.08385	0.253	0.129	2.2186e-05	2.21605e-05	6.82865e-08	1.01928e-07	4.65392	0.295455	0.133333	0.330435	0.157895	0.110465
Polr1b	0.843835	0.294	0.164	2.21928e-05	1.83848e-05	2.22386e-07	1.15192e-06	4.65379	0.257576	0.25641	0.347826	0.201754	0.139535
Abcb6	0.189581	0.454	0.357	2.22569e-05	2.22757e-07	0.00807755	0.000352112	4.65254	0.257576	0.702564	0.36087	0.29386	0.398256
Pcbp1	0.399956	0.772	0.586	2.23101e-05	1.88107e-06	1.78992e-07	1.2907e-10	4.6515	0.742424	0.74359	0.8	0.649123	0.543605
Nfs1	0.793225	0.275	0.164	2.2333e-05	7.24218e-06	7.12699e-06	3.45073e-05	4.65105	0.242424	0.251282	0.313043	0.166667	0.162791
Aldh6a1	0.836833	0.461	0.327	2.2383e-05	6.75239e-10	9.80812e-06	1.04315e-05	4.65008	0.545455	0.420513	0.447826	0.302632	0.343023
Rab27b	0.631428	0.224	0.131	2.23831e-05	6.06593e-07	6.23574e-05	0.000123288	4.65008	0.181818	0.241026	0.234783	0.166667	0.107558
Vapb	0.614099	0.582	0.4	2.24447e-05	3.40246e-06	1.23647e-09	4.2443e-09	4.64889	0.681818	0.420513	0.66087	0.447368	0.369186
Akap8l	0.530819	0.589	0.465	2.24761e-05	3.66499e-06	1.33451e-06	2.18704e-06	4.64828	0.75	0.461538	0.604348	0.491228	0.447674
Sbno2	0.669276	0.406	0.243	2.25202e-05	2.23966e-05	1.43175e-08	2.12009e-08	4.64743	0.439394	0.4	0.391304	0.263158	0.229651
Gsto1	0.316639	0.675	0.551	2.27445e-05	2.03696e-06	4.25478e-05	8.52561e-05	4.64312	0.643939	0.733333	0.63913	0.517544	0.572674
H2-DMa	0.602391	0.738	0.619	2.28233e-05	9.16168e-09	5.49149e-09	3.08331e-09	4.64162	0.848485	0.507692	0.843478	0.596491	0.633721
Arl4a	0.646458	0.244	0.152	2.28594e-05	1.05861e-05	0.000126606	0.000462092	4.64094	0.204545	0.333333	0.191304	0.157895	0.148256
Vbp1	-0.381344	0.883	0.923	2.29053e-05	9.74826e-06	7.22004e-10	3.29763e-09	4.64006	0.833333	0.928205	0.83913	0.916667	0.927326
Stxbp2	-0.284892	0.953	0.955	2.29944e-05	2.07503e-06	8.42734e-08	3.84889e-08	4.63838	0.833333	0.979487	0.947826	0.942982	0.962209
Dap3	-0.279623	0.95	0.983	2.32546e-05	1.13562e-05	2.54955e-08	7.07593e-08	4.63349	0.909091	0.964103	0.930435	0.982456	0.982558
Kmt2d	0.693202	0.451	0.304	2.33012e-05	8.21599e-06	7.1245e-08	3.30738e-07	4.63262	0.606061	0.364103	0.434783	0.29386	0.311047
Il6st	0.545016	0.709	0.524	2.33787e-05	1.29652e-06	1.37391e-09	5.487e-10	4.63118	0.886364	0.589744	0.695652	0.530702	0.520349
Mapk11	1.12175	0.246	0.117	2.35994e-05	6.43996e-06	1.88289e-08	9.23376e-08	4.6271	0.386364	0.117949	0.273913	0.144737	0.0988372
Gapvd1	0.27258	0.874	0.757	2.36159e-05	7.23633e-06	1.76436e-05	1.09113e-06	4.6268	0.818182	0.882051	0.869565	0.763158	0.752907
Ankrd12	0.900834	0.314	0.177	2.3644e-05	1.22175e-05	3.82217e-08	2.28791e-07	4.62628	0.363636	0.189744	0.391304	0.22807	0.142442
Tarsl2	0.72231	0.162	0.098	2.37515e-05	2.37168e-05	0.00142646	0.00593584	4.62431	0.0606061	0.292308	0.108696	0.118421	0.0843023
Cenpx	0.575489	0.555	0.371	2.37955e-05	9.30501e-06	2.68962e-09	3.91578e-09	4.6235	0.575758	0.523077	0.569565	0.447368	0.319767
Ppm1g	0.335806	0.758	0.617	2.39711e-05	2.37318e-06	2.53328e-06	1.58722e-06	4.62031	0.75	0.779487	0.734783	0.605263	0.625
Mnat1	0.815945	0.357	0.217	2.40812e-05	9.29795e-06	6.50315e-08	3.71427e-07	4.61832	0.462121	0.282051	0.36087	0.280702	0.174419
Nup214	0.607925	0.522	0.344	2.41807e-05	6.42404e-06	3.8384e-09	1.08145e-08	4.61653	0.598485	0.410256	0.573913	0.394737	0.311047
Selenot	0.306958	0.928	0.86	2.4342e-05	1.34201e-05	2.70058e-08	1.70804e-07	4.61364	0.924242	0.887179	0.947826	0.859649	0.860465
Pip5k1a	0.868413	0.3	0.182	2.44332e-05	2.00485e-05	1.38409e-06	1.81783e-06	4.61202	0.363636	0.225641	0.326087	0.214912	0.159884
Atrn	0.697301	0.373	0.233	2.45532e-05	8.73935e-06	2.49369e-07	1.47696e-06	4.60989	0.371212	0.333333	0.408696	0.236842	0.229651
Mfap3	0.722651	0.4	0.231	2.45886e-05	1.6107e-05	4.17673e-09	3.0526e-09	4.60927	0.424242	0.323077	0.452174	0.324561	0.168605
Tcim	1.21588	0.153	0.07	2.47166e-05	2.16519e-05	8.13902e-06	1.81259e-05	4.60701	0.189394	0.102564	0.173913	0.0877193	0.0581395
Piezo1	0.714335	0.384	0.231	2.47332e-05	5.2661e-06	3.17184e-08	1.45112e-07	4.60672	0.44697	0.312821	0.408696	0.241228	0.223837
Dazap1	0.253915	0.874	0.79	2.47744e-05	5.90448e-06	5.24048e-05	8.69759e-05	4.606	0.833333	0.876923	0.873913	0.741228	0.822674
Arntl	1.07661	0.26	0.133	2.48673e-05	6.12156e-06	4.01427e-08	1.71604e-07	4.60437	0.401515	0.133333	0.286957	0.175439	0.104651
Ralgds	0.939258	0.312	0.156	2.4953e-05	1.85332e-05	1.2608e-09	1.83288e-09	4.60288	0.378788	0.2	0.369565	0.175439	0.142442
Chchd1	-0.371306	0.835	0.888	2.49694e-05	7.74105e-06	1.45108e-08	6.37916e-08	4.60259	0.727273	0.958974	0.765217	0.921053	0.866279
Phrf1	0.60521	0.424	0.283	2.50031e-05	8.99591e-06	8.22691e-07	4.39908e-06	4.60201	0.439394	0.415385	0.421739	0.285088	0.281977
Mxd3	0.58708	0.268	0.177	2.5134e-05	1.15354e-05	0.000299336	0.00108326	4.59974	0.136364	0.364103	0.26087	0.149123	0.194767
Ube2r2	0.267784	0.908	0.851	2.53449e-05	8.81321e-06	4.19542e-06	2.66457e-05	4.59611	0.840909	0.892308	0.93913	0.850877	0.851744
Slc16a9	0.688531	0.433	0.264	2.60057e-05	8.28652e-06	3.15684e-09	1.80562e-08	4.58493	0.484848	0.328205	0.491304	0.311404	0.232558
Men1	-0.418483	0.614	0.664	2.60212e-05	4.66088e-06	7.99539e-05	5.06406e-07	4.58467	0.590909	0.65641	0.582609	0.666667	0.662791
Foxk1	0.765169	0.418	0.255	2.60254e-05	6.24066e-06	4.61198e-09	3.11408e-08	4.5846	0.575758	0.312821	0.417391	0.324561	0.209302
Slc15a3	0.778694	0.397	0.215	2.61367e-05	1.0719e-05	1.6746e-10	1.02469e-10	4.58275	0.401515	0.292308	0.482609	0.254386	0.188953
Chek2	0.714799	0.285	0.166	2.61906e-05	2.61189e-05	2.20813e-06	6.16879e-06	4.58186	0.340909	0.251282	0.282609	0.175439	0.159884
Fbxo5	0.485797	0.345	0.236	2.62257e-05	6.38935e-06	0.000160609	0.000171465	4.58127	0.272727	0.517949	0.23913	0.29386	0.197674
Cgnl1	0.964337	0.199	0.108	2.64018e-05	9.99836e-06	1.80574e-05	6.34804e-05	4.57837	0.257576	0.138462	0.217391	0.105263	0.110465
Fgl2	-0.309243	0.609	0.593	2.6429e-05	1.29197e-07	0.0391855	2.74393e-07	4.57792	0.537879	0.528205	0.713043	0.631579	0.56686
Ei24	0.667155	0.436	0.297	2.64292e-05	1.81954e-05	4.61654e-07	1.82998e-06	4.57792	0.492424	0.389744	0.443478	0.346491	0.264535
Pcnp	0.616787	0.519	0.362	2.64331e-05	8.84264e-06	2.87971e-08	1.98927e-07	4.57785	0.598485	0.410256	0.565217	0.434211	0.313953
Ninj1	0.621811	0.526	0.362	2.64439e-05	3.01317e-06	1.2513e-08	8.13969e-08	4.57768	0.545455	0.446154	0.586957	0.390351	0.343023
Vav1	0.591003	0.688	0.491	2.65439e-05	6.58563e-06	3.6097e-10	8.09553e-11	4.57604	0.787879	0.497436	0.782609	0.54386	0.456395
Rnf41	-0.248161	0.67	0.71	2.65711e-05	2.0892e-06	0.000469375	0.000544794	4.57559	0.75	0.646154	0.626087	0.723684	0.700581
Wdr43	-0.34184	0.774	0.823	2.68654e-05	2.96144e-06	1.69246e-06	2.66991e-06	4.57081	0.666667	0.928205	0.665217	0.916667	0.761628
Setd7	-0.232235	0.776	0.823	2.70505e-05	1.68592e-06	0.000977741	0.00340908	4.56782	0.901515	0.733333	0.730435	0.798246	0.840116
Dennd2d	1.07875	0.255	0.136	2.71657e-05	2.55113e-05	2.00187e-07	1.99717e-07	4.56598	0.318182	0.169231	0.291304	0.219298	0.0813953
Avl9	0.903408	0.302	0.159	2.71861e-05	1.52853e-05	1.52738e-08	7.53012e-08	4.56565	0.416667	0.246154	0.282609	0.197368	0.133721
Meis1	1.03834	0.235	0.117	2.724e-05	3.00274e-06	2.18522e-07	1.00892e-06	4.56479	0.30303	0.133333	0.282609	0.157895	0.0901163
Mcm9	0.664948	0.442	0.308	2.72647e-05	4.07443e-06	6.17498e-07	2.20486e-06	4.5644	0.522727	0.374359	0.452174	0.372807	0.264535
Fam45a	0.901703	0.241	0.126	2.72654e-05	2.20011e-05	6.47505e-07	3.32075e-06	4.56439	0.25	0.235897	0.23913	0.157895	0.104651
Med28	0.448357	0.768	0.598	2.74107e-05	7.98606e-06	9.22462e-09	2.15947e-09	4.56208	0.780303	0.707692	0.795652	0.565789	0.619186
Actl6a	0.611859	0.408	0.281	2.74108e-05	6.83463e-06	6.78334e-06	2.92673e-05	4.56208	0.393939	0.394872	0.426087	0.342105	0.241279
Plekhm2	0.674791	0.44	0.271	2.74766e-05	1.23796e-05	9.0293e-09	1.94673e-08	4.56104	0.484848	0.338462	0.5	0.315789	0.241279
Fam222b	0.801535	0.284	0.161	2.75077e-05	2.06915e-05	6.69281e-07	3.90108e-06	4.56055	0.280303	0.287179	0.282609	0.20614	0.130814
Tbc1d25	0.860192	0.262	0.149	2.75482e-05	1.68397e-05	1.86858e-06	1.00015e-05	4.55991	0.242424	0.246154	0.286957	0.144737	0.151163
Nckap1	0.882883	0.255	0.135	2.75622e-05	1.4525e-05	4.49006e-07	1.6224e-06	4.55969	0.30303	0.246154	0.234783	0.162281	0.116279
Elp4	0.945228	0.217	0.114	2.75652e-05	2.75238e-05	2.71635e-06	1.40664e-05	4.55964	0.295455	0.230769	0.16087	0.162281	0.0813953
Cd247	1.16811	0.233	0.121	2.77773e-05	5.22886e-06	3.80236e-07	6.40344e-07	4.55631	0.363636	0.112821	0.26087	0.153509	0.0988372
Traj20	0.967767	0.379	0.234	2.77774e-05	1.24292e-07	3.18333e-08	5.40031e-08	4.55631	0.507576	0.271795	0.395652	0.267544	0.212209
Marveld1	0.777176	0.352	0.219	2.78817e-05	9.48342e-06	4.53158e-07	2.15959e-06	4.55468	0.431818	0.266667	0.378261	0.232456	0.209302
Mbtd1	1.02146	0.246	0.133	2.79166e-05	1.83081e-05	5.8784e-07	1.03139e-06	4.55414	0.310606	0.112821	0.321739	0.184211	0.0988372
Tvp23b	0.753181	0.404	0.247	2.79452e-05	1.60373e-05	1.37193e-08	8.5805e-08	4.55369	0.378788	0.297436	0.508696	0.276316	0.226744
Arl6ip1	-0.213332	0.995	1	2.80249e-05	7.00106e-06	1.54396e-10	9.26277e-10	4.55246	0.984848	0.989744	0.995652	1	1
Cenpq	0.719655	0.28	0.157	2.8074e-05	1.94477e-05	1.03489e-06	1.25062e-06	4.5517	0.280303	0.333333	0.234783	0.197368	0.130814
Exoc3l	0.571461	0.357	0.234	2.81099e-05	1.65978e-05	1.2979e-05	2.69555e-05	4.55114	0.348485	0.307692	0.404348	0.223684	0.241279
Sdhc	0.386627	0.74	0.524	2.81761e-05	4.99414e-06	5.09081e-08	5.19267e-14	4.55012	0.734848	0.8	0.686957	0.561404	0.5
Sipa1l1	0.765878	0.425	0.278	2.82313e-05	3.66327e-06	7.49157e-08	2.75142e-07	4.54927	0.575758	0.317949	0.430435	0.355263	0.226744
Nedd4l	1.23997	0.18	0.072	2.83622e-05	1.1183e-05	5.77857e-08	1.42642e-07	4.54726	0.272727	0.0769231	0.213043	0.100877	0.0523256
Zdhhc5	0.708448	0.355	0.219	2.83952e-05	1.04898e-05	4.0974e-07	2.15822e-06	4.54675	0.409091	0.282051	0.386957	0.263158	0.188953
Timp3	-0.517551	0.768	0.74	2.85137e-05	5.68068e-17	0.185205	0.000170716	4.54495	0.75	0.702564	0.821739	0.622807	0.81686
Kat6a	-0.226658	0.874	0.909	2.85807e-05	6.56235e-06	6.6816e-05	0.000378335	4.54393	0.886364	0.846154	0.852174	0.885965	0.924419
Pnpt1	0.805975	0.305	0.18	2.86194e-05	1.95426e-05	7.8466e-07	4.2655e-06	4.54334	0.325758	0.307692	0.291304	0.245614	0.136628
[truncated: 7,031 more rows]
