# Supplementary material for: Genetic Ablation and Multi-Omics Profiling Reveal CEP55 as a Key Driver of Tumorigenesis in Diverse Cancer Models
Source: Research Square preprint supplement (doi:10.21203/rs.3.rs-8060108/v1), 2025-11-28
Supplement: Supplementary file 3 [file 1387 signatures.xlsx]

## Sheet: col.names
Signatures
1_G2_Phase
2_Processive_synthesis_on_the_lagging_strand
3_Removal_of_the_Flap_Intermediate
4_Ubiquitin-dependent_degradation_of_Cyclin_D1
5_Establishment_of_Sister_Chromatid_Cohesion
6_Association_of_licensing_factors_with_the_pre-replicative_complex
7_Removal_of_licensing_factors_from_origins
8_extrinsic_prothrombin_activation_pathway
9_IL23-mediated_signaling_events
10_il-7_signal_transduction
11_growth_hormone_signaling_pathway
12_CDO_in_myogenesis
13_G_alpha_(s)_signalling_events
14_Opsins
15_Free_fatty_acid_receptors
16_Adenosine_P1_receptors
17_Lysosphingolipid_and_LPA_receptors
18_Glucagon-type_ligand_receptors
19_Class_C/3_(Metabotropic_glutamate/pheromone_receptors)
20_Class_B/2_(Secretin_family_receptors)
21_Calcitonin-like_ligand_receptors
22_chromatin_remodeling_by_hswi/snf_atp-dependent_complexes
23_how_does_salmonella_hijack_a_cell
24_sprouty_regulation_of_tyrosine_kinase_signals
25_erythropoietin_mediated_neuroprotection_through_nf-kb
26_the_information_processing_pathway_at_the_ifn_beta_enhancer
27_role_of_erk5_in_neuronal_survival_pathway
28_egf_signaling_pathway
29_repression_of_pain_sensation_by_the_transcriptional_regulator_dream
30_adp-ribosylation_factor
31_EPHA_forward_signaling
32_induction_of_apoptosis_through_dr3_and_dr4/5_death_receptors
33_activation_of_csk_by_camp-dependent_protein_kinase_inhibits_signaling_through_the_t_cell_receptor
34_Canonical_Wnt_signaling_pathway
35_tpo_signaling_pathway
36_Signaling_events_mediated_by_PRL
37_Nephrin/Neph1_signaling_in_the_kidney_podocyte
38_Osteopontin-mediated_events
39_cardiac_protection_against_ros
40_Retinoic_acid_receptors-mediated_signaling
41_Regulation_of_Insulin_Secretion_by_Glucagon-like_Peptide-1
42_Regulation_of_Insulin_Secretion_by_Fatty_Acids_Bound_to_GPR40_(FFAR1)
43_PKA_activation_in_glucagon_signalling
44_Glucagon_signaling_in_metabolic_regulation
45_Inhibition_of_Insulin_Secretion_by_Adrenaline/Noradrenaline
46_Regulation_of_Insulin_Secretion
47_Regulation_of_Insulin_Secretion_by_Acetylcholine
48_proteasome_complex
49_PKA-mediated_phosphorylation_of_key_metabolic_factors
50_Apoptotic_cleavage_of_cellular_proteins
51_Apoptotic_execution__phase
52_Activation_of_caspases_through_apoptosome-mediated_cleavage
53_SMAC-mediated_dissociation_of_IAP_caspase_complexes
54_SMAC_binds_to_IAPs
55_Release_of_apoptotic_factors_from_the_mitochondria
56_Formation_of_apoptosome
57_Role_of_Abl_in_Robo-Slit_signaling
58_L1CAM_interactions
59_PDGFR-alpha_signaling_pathway
60_Recycling_pathway_of_L1
61_role_of_ppar-gamma_coactivators_in_obesity_and_thermogenesis
62_Interaction_between_L1_and_Ankyrins
63_Import_of_palmitoyl-CoA_into_the_mitochondrial_matrix
64_Conversion_of_palmitic_acid_to_very_long_chain_fatty_acyl-CoAs
65_Signal_transduction_by_L1
66_Triacylglycerol_biosynthesis
67_Hormone-sensitive_lipase_(HSL)-mediated_triacylglycerol_hydrolysis
68_LDL-mediated_lipid_transport
69_HDL-mediated_lipid_transport
70_Chylomicron-mediated_lipid_transport
71_Neurofascin_interactions
72_NrCAM_interactions
73_FGF_signaling_pathway
74_RhoA_signaling_pathway
75_IGF1_pathway
76_FOXM1_transcription_factor_network
77_Signaling_events_mediated_by_HDAC_Class_I
78_Formation_of_the_HIV-1_Early_Elongation_Complex
79_RNA_Pol_II_CTD_phosphorylation_and_interaction_with_CE_1
80_RNA_Polymerase_II_HIV-1_Promoter_Escape
81_HIV-1_Transcription_Initiation
82_Transcription_of_the_HIV_genome
83_Late_Phase_of_HIV_Life_Cycle
84_Autointegration_results_in_viral_DNA_circles
85_activation_of_pkc_through_g-protein_coupled_receptors
86_Formation_of_HIV-1_elongation_complex_containing_HIV-1_Tat
87_Tat-mediated_elongation_of_the_HIV-1_transcript
88_Downregulation_of_TGF-beta_receptor_signaling
89_TGF-beta_receptor_signaling_activates_SMADs
90_TGF-beta_receptor_signaling_in_EMT_(epithelial_to_mesenchymal_transition)
91_Downregulation_of_SMAD2/3_SMAD4_transcriptional_activity
92_SMAD2/SMAD3_SMAD4_heterotrimer_regulates_transcription
93_Pre-NOTCH_Processing_in_the_Endoplasmic_Reticulum
94_Pre-NOTCH_Transcription_and_Translation
95_Vif-mediated_degradation_of_APOBEC3G
96_APOBEC3G_mediated_resistance_to_HIV-1_infection
97_E2F_transcription_factor_network
98_Membrane_binding_and_targetting_of_GAG_proteins
99_Vpr-mediated_nuclear_import_of_PICs
100_Vpr-mediated_induction_of_apoptosis_by_mitochondrial_outer_membrane_permeabilization
101_Nuclear_import_of_Rev_protein
102_antisense_pathway
103_tnfr2_signaling_pathway
104_The_IPAF_inflammasome
105_The_NLRP1_inflammasome
106_Advanced_glycosylation_endproduct_receptor_signaling
107_The_AIM2_inflammasome
108_NOD1/2_Signaling_Pathway
109_The_NLRP3_inflammasome
110_Inflammasomes
111_TRAF3-dependent_IRF_activation_pathway
112_RIG-I/MDA5_mediated_induction_of_IFN-alpha/beta_pathways
113_Cyclin_E_associated_events_during_G1/S_transition
114_G0_and_Early_G1
115_Cyclin_D_associated_events_in_G1
116_Inhibition_of_the_proteolytic_activity_of_APC/C_required_for_the_onset_of_anaphase_by_mitotic_spindle_checkpoint_components
117_Amplification__of_signal_from_unattached__kinetochores_via_a_MAD2__inhibitory_signal
118_Inactivation_of_APC/C_via_direct_inhibition_of_the_APC/C_complex
119_basic_mechanism_of_action_of_ppara_pparb(d)_and_pparg_and_effects_on_gene_expression
120_HIF-2-alpha_transcription_factor_network
121_P2Y_receptors
122_Nongenotropic_Androgen_signaling
123_Elongation_arrest_and_recovery
124_Transcriptional_Regulation_of_White_Adipocyte_Differentiation
125_Dopamine_receptors
126_Adrenoceptors
127_Serotonin_receptors
128_Histamine_receptors
129_Eicosanoid_ligand-binding_receptors
130_Hormone_ligand-binding_receptors
131_Leukotriene_receptors
132_Prostanoid_ligand_receptors
133_regulation_of_bad_phosphorylation
134_links_between_pyk2_and_map_kinases
135_segmentation_clock
136_gamma-aminobutyric_acid_receptor_life_cycle_pathway
137_Thromboxane_A2_receptor_signaling
138_role_of_ran_in_mitotic_spindle_regulation
139_ADP_signalling_through_P2Y_purinoceptor_12
140_Syndecan-1-mediated_signaling_events
141_Regulation_of_Ras_family_activation
142_Degradation_of_beta_catenin
143_anthrax_toxin_mechanism_of_action
144_Passive_Transport_by_Aquaporins
145_Regulation_of_Telomerase
146_Regulation_of_Water_Balance_by_Renal_Aquaporins
147_Transport_of_Glycerol_from_Adipocytes_to_the_Liver_by_Aquaporins
148_e2f1_destruction_pathway
149_Iron_uptake_and_transport
150_multi-drug_resistance_factors
151_Transferrin_endocytosis_and_recycling
152_y_branching_of_actin_filaments
153_ras_signaling_pathway
154_carm1_and_regulation_of_the_estrogen_receptor
155_Ion_transport_by_P-type_ATPases
156_caspase_cascade_in_apoptosis
157_Ligand-gated_ion_channel_transport
158_regulation_of_eif-4e_and_p70s6_kinase
159_visceral_fat_deposits_and_the_metabolic_syndrome
160_p38_MAPK_signaling_pathway
161_Ubiquinol_biosynthesis
162_Integration_of_energy_metabolism
163_Synthesis_of_Hepoxilins_(HX)_and_Trioxilins_(TrX)
164_Synthesis_of_(16-20)-hydroxyeicosatetraenoic_acids_(HETE)
165_Synthesis_of_12-eicosatetraenoic_acid_derivatives
166_Synthesis_of_Lipoxins_(LX)
167_Sphingolipid_de_novo_biosynthesis
168_Glycosphingolipid_metabolism
169_Synthesis_of_epoxy_(EET)_and_dihydroxyeicosatrienoic_acids_(DHET)
170_FAS_(CD95)_signaling_pathway
171_Activation_of_NOXA_and_translocation_to_mitochondria
172_Activation_of_PUMA_and_translocation_to_mitochondria
173_Activation_of_BAD_and_translocation_to_mitochondria
174_BH3-only_proteins_associate_with_and_inactivate_anti-apoptotic_BCL-2_members
175_Activation__translocation_and_oligomerization_of_BAX
176_Activation_of_BIM_and_translocation_to_mitochondria
177_Activation_of_BMF_and_translocation_to_mitochondria
178_Activation_and_oligomerization_of_BAK_protein
179_Insulin-mediated_glucose_transport
180_mitochondrial_fatty_acid_beta-oxidation_of_unsaturated_fatty_acids
181_Beta_oxidation_of_decanoyl-CoA_to_octanoyl-CoA-CoA
182_Beta_oxidation_of_octanoyl-CoA_to_hexanoyl-CoA
183_Beta_oxidation_of_hexanoyl-CoA_to_butanoyl-CoA
184_Beta_oxidation_of_butanoyl-CoA_to_acetyl-CoA
185_Beta_oxidation_of_palmitoyl-CoA_to_myristoyl-CoA
186_Beta_oxidation_of_lauroyl-CoA_to_decanoyl-CoA-CoA
187_JNK_signaling_in_the_CD4__TCR_pathway
188_cbl_mediated_ligand-induced_downregulation_of_egf_receptors_pathway
189_FOXA2_and_FOXA3_transcription_factor_networks
190_Circadian_rhythm_pathway
191_Arf6_downstream_pathway
192_aspirin_blocks_signaling_pathway_involved_in_platelet_activation
193_Lissencephaly_gene_(LIS1)_in_neuronal_migration_and_development
194_eicosanoid_metabolism
195_Retrograde_neurotrophin_signalling
196_Signaling_by_PDGF
197_Downstream_signal_transduction
198_PLC-gamma1_signalling
199_PI3K/AKT_activation
200_Signalling_to_STAT3
201_Signalling_to_ERK5
202_VEGF_ligand-receptor_interactions
203_Toll_Like_Receptor_TLR1_TLR2_Cascade
204_regulation_of_cell_cycle_progression_by_plk3
205_DAI_mediated_induction_of_type_I_IFNs
206_IRF3_mediated_activation_of_type_1_IFN
207_CREB_phosphorylation_through_the_activation_of_CaMKII
208_CREB_phosphorylation_through_the_activation_of_CaMKK
209_NF-kB_activation_through_FADD/RIP-1_pathway_mediated_by_caspase-8_and_-10
210_TRAF6_mediated_IRF7_activation
211_TRAF6_mediated_NF-kB_activation
212_Negative_regulators_of_RIG-I/MDA5_signaling
213_Unblocking_of_NMDA_receptor__glutamate_binding_and_activation
214_Beta_defensins
215_Cyclin_A_Cdk2-associated_events_at_S_phase_entry
216_Inhibition_of_replication_initiation_of_damaged_DNA_by_RB1/E2F1
217_E2F-enabled_inhibition_of_pre-replication_complex_formation
218_Activation_of_the_pre-replicative_complex
219_E2F_mediated_regulation_of_DNA_replication
220_G1/S-Specific_Transcription
221_SCF(Skp2)-mediated_degradation_of_p27/p21
222_Phosphorylation_of_proteins_involved_in_G1/S_transition_by_active_Cyclin_E_Cdk2_complexes
223_alternative_complement_pathway
224_roles_of___arrestin_dependent_recruitment_of_src_kinases_in_gpcr_signaling
225_ErbB2/ErbB3_signaling_events
226_IL3-mediated_signaling_events
227_TNF_receptor_signaling_pathway
228_EGFR_Transactivation_by_Gastrin
229_Adenylate_cyclase_activating_pathway
230_Adenylate_cyclase_inhibitory_pathway
231_DARPP-32_events
232_Gastrin-CREB_signalling_pathway_via_PKC_and_MAPK
233_PLC_beta_mediated_events
234_phospho-PLA2_pathway
235_il_6_signaling_pathway
236_Validated_transcriptional_targets_of_TAp63_isoforms
237_IL2_signaling_events_mediated_by_STAT5
238_ahr_signal_transduction_pathway
239_cystic_fibrosis_transmembrane_conductance_regulator_(cftr)_and_beta_2_adrenergic_receptor_(b2ar)_pathway
240_tumor_suppressor_arf_inhibits_ribosomal_biogenesis
241_IFN-gamma_pathway
242_TRAF6_mediated_IRF7_activation_in_TLR7/8_or_9_signaling
243_sumoylation_by_ranbp2_regulates_transcriptional_repression
244_platelet_amyloid_precursor_protein_pathway
245_EPHA2_forward_signaling
246_Toll_Like_Receptor_9_(TLR9)_Cascade
247_mechanism_of_protein_import_into_the_nucleus
248_Signaling_events_mediated_by_HDAC_Class_III
249_Regulation_of_Androgen_receptor_activity
250_cd40l_signaling_pathway
251_fas_signaling_pathway_(cd95)
252_Regulation_of_RhoA_activity
253_RAC1_signaling_pathway
254_Insulin_Pathway
255_Validated_targets_of_C-MYC_transcriptional_repression
256_Recycling_of_bile_acids_and_salts
257_Synthesis_of_bile_acids_and_bile_salts_via_27-hydroxycholesterol
258_Synthesis_of_bile_acids_and_bile_salts_via_24-hydroxycholesterol
259_Synthesis_of_bile_acids_and_bile_salts_via_7alpha-hydroxycholesterol
260_Synthesis_of_bile_acids_and_bile_salts
261_Activation_of_Gene_Expression_by_SREBP_(SREBF)
262_Regulation_of_Cholesterol_Biosynthesis_by_SREBP_(SREBF)
263_Cholesterol_biosynthesis
264_Visual_signal_transduction__Rods
265_Dimerization_of_procaspase-8
266_Caspase-8_activation
267_TRAIL__signaling
268_TNF_signaling
269_FasL/_CD95L_signaling
270_Activation__myristolyation_of_BID_and_translocation_to_mitochondria
271_rac1_cell_motility_signaling_pathway
272_Metabolism_of_folate_and_pterines
273_Nicotinamide_salvaging
274_Amino_acid_synthesis_and_interconversion_(transamination)
275_Molybdenum_cofactor_biosynthesis
276_Branched-chain_amino_acid_catabolism
277_Activation_of_PKB
278_NICD_traffics_to_nucleus
279_Circadian_Repression_of_Expression_by_REV-ERBA
280_BMAL1_CLOCK/NPAS2_Activates_Circadian_Expression
281_Circadian_Clock
282_APC-Cdc20_mediated_degradation_of_Nek2A
283_A_third_proteolytic_cleavage_releases_NICD
284_RORA_Activates_Circadian_Expression
285_mcalpain_and_friends_in_cell_motility
286_brca1_dependent_ub_ligase_activity
287_CXCR4-mediated_signaling_events
288_GRB7_events_in_ERBB2_signaling
289_PLCG1_events_in_ERBB2_signaling
290_Regulation_of_KIT_signaling
291_Signaling_by_SCF-KIT
292_Neurophilin_interactions_with_VEGF_and_VEGFR
293_VEGF_binds_to_VEGFR_leading_to_receptor_dimerization
294_PI3K_events_in_ERBB2_signaling
295_GRB2_events_in_ERBB2_signaling
296_SHC1_events_in_ERBB2_signaling
297_Signaling_by_ERBB2
298_TRAF6_mediated_induction_of_TAK1_complex
299_TRIF-mediated_programmed_cell_death
300_Toll_Like_Receptor_7/8_(TLR7/8)_Cascade
301_Toll_Like_Receptor_5_(TLR5)_Cascade
302_MyD88-independent_cascade
303_IKK_complex_recruitment_mediated_by_RIP1
304_Activation_of_IRF3/IRF7_mediated_by_TBK1/IKK_epsilon
305_TRAF6_mediated_induction_of_NFkB_and_MAP_kinases_upon_TLR7/8_or_9_activation
306_MyD88_dependent_cascade_initiated_on_endosome
307_Beta2_integrin_cell_surface_interactions
308_antigen_processing_and_presentation
309_cell_cycle__g1/s_check_point
310_Trafficking_of_GluR2-containing_AMPA_receptors
311_Trafficking_of_AMPA_receptors
312_RAF_activation
313_Highly_sodium_permeable_acetylcholine_nicotinic_receptors
314_Highly_calcium_permeable_postsynaptic_nicotinic_acetylcholine_receptors
315_Highly_calcium_permeable_nicotinic_acetylcholine_receptors
316_visual_signal_transduction
317_Notch_signaling_pathway
318_Internalization_of_ErbB1
319_mechanism_of_gene_regulation_by_peroxisome_proliferators_via_ppara
320_stathmin_and_breast_cancer_resistance_to_antimicrotubule_agents
321_G_alpha_(12/13)_signalling_events
322_G_alpha_(q)_signalling_events
323_G_alpha_(z)_signalling_events
324_G_alpha_(i)_signalling_events
325_Olfactory_Signaling_Pathway
326_G_beta_gamma_signalling_through_PLC_beta
327_G_beta_gamma_signalling_through_PI3Kgamma
328_G-protein_activation
329_Opioid_Signalling
330_FOXA1_transcription_factor_network
331_d4gdi_signaling_pathway
332_Glypican_3_network
333_role_of_egf_receptor_transactivation_by_gpcrs_in_cardiac_hypertrophy
334_fc_epsilon_receptor_i_signaling_in_mast_cells
335_Plexin-D1_Signaling
336_regulation_of_ck1/cdk5_by_type_1_glutamate_receptors
337_C-MYC_pathway
338_Beta-oxidation_of_very_long_chain_fatty_acids
339_PPARA_Activates_Gene_Expression
340_Beta-oxidation_of_pristanoyl-CoA
341_Synthesis_of_Ketone_Bodies
342_Utilization_of_Ketone_Bodies
343_Regulation_of_Lipid_Metabolism_by_Peroxisome_proliferator-activated_receptor_alpha_(PPARalpha)
344_DAP12_signaling
345_DAP12_interactions
346_Role_of_phospholipids_in_phagocytosis
347_ATP_sensitive_Potassium_channels
348_Classical_Kir_channels
349_Voltage_gated_Potassium_channels
350_FCGR_activation
351_STING_mediated_induction_of_type_1_IFN
352_RIP-mediated_NFkB_activation_via_DAI
353_classical_complement_pathway
354_GPVI-mediated_activation_cascade
355_Platelet_Aggregation_(Plug_Formation)
356_Thromboxane_signalling_through_TP_receptor
357_Phenylalanine_and_tyrosine_catabolism
358_Processing_of_Intronless_Pre-mRNAs
359_Urea_synthesis
360_Carnitine_synthesis
361_Creatine_metabolism
362_Metabolism_of_polyamines
363_Interconversion_of_polyamines
364_Transport_of_the_SLBP_Dependant_Mature_mRNA
365_Fructose_catabolism
366_Galactose_catabolism
367_GP1b-IX-V_activation_signalling
368_Glycolysis
369_Gluconeogenesis
370_Glycogen_synthesis
371_Glycogen_breakdown_(glycogenolysis)
372_Arf6_signaling_events
373_IL4-mediated_signaling_events
374_Fatty_Acyl-CoA_Biosynthesis
375_Notch-mediated_HES/HEY_network
376_Regulation_of_retinoblastoma_protein
377_the_prc2_complex_sets_long-term_gene_silencing_through_modification_of_histone_tails
378_Alternative_NF-kappaB_pathway
379_Axonal_growth_inhibition_(RHOA_activation)
380_Regulated_proteolysis_of_p75NTR
381_Axonal_growth_stimulation
382_NF-kB_is_activated_and_signals_survival
383_Ceramide_signalling
384_p75NTR_recruits_signalling_complexes
385_Syndecan-4-mediated_signaling_events
386_mechanisms_of_transcriptional_repression_by_dna_methylation
387_srebp_control_of_lipid_synthesis
388_Regulation_of_cytoplasmic_and_nuclear_SMAD2/3_signaling
389_Proteoglycan_syndecan-mediated_signaling_events
390_Signaling_mediated_by_p38-gamma_and_p38-delta
391_HIV-1_Nef__Negative_effector_of_Fas_and_TNF-alpha
392_rho_cell_motility_signaling_pathway
393_Inhibition_of_Host_mRNA_Processing_and_RNA_Silencing
394_Release
395_Inhibition_of_PKR
396_Influenza_Virus_Induced_Apoptosis
397_Inhibition_of_IFN-beta
398_Phagosomal_maturation_(early_endosomal_stage)
399_G2/M_DNA_damage_checkpoint
400_Chk1/Chk2(Cds1)_mediated_inactivation_of_Cyclin_B_Cdk1_complex
401_Activation_of_ATR_in_response_to_replication_stress
402_p53-Independent_DNA_Damage_Response
403_Ubiquitin_Mediated_Degradation_of_Phosphorylated_Cdc25A
404_Translocation_of_GLUT4_to_the_Plasma_Membrane
405_Inhibition_of_HSL
406_c-src_mediated_regulation_of_Cx43_function_and_closure_of_gap_junctions
407_Endosomal_Sorting_Complex_Required_For_Transport_(ESCRT)
408_Signaling_events_mediated_by_VEGFR1_and_VEGFR2
409_atm_signaling_pathway
410_IL8-_and_CXCR2-mediated_signaling_events
411_ATM_mediated_response_to_DNA_double-strand_break
412_The_canonical_retinoid_cycle_in_rods_(twilight_vision)
413_The_retinoid_cycle_in_cones_(daylight_vision)
414_Retinoid_metabolism_and_transport
415_ATM_mediated_phosphorylation_of_repair_proteins
416_Recruitment_of_repair_and_signaling_proteins_to_double-strand_breaks
417_Deadenylation_of_mRNA
418_toll-like_receptor_pathway
419_Signaling_events_mediated_by_HDAC_Class_II
420_ca-calmodulin-dependent_protein_kinase_activation
421_pdgf_signaling_pathway
422_cadmium_induces_dna_synthesis_and_proliferation_in_macrophages
423_fosb_gene_expression_and_drug_abuse
424_Reelin_signaling_pathway
425_DAG_and_IP3_signaling
426_CaM_pathway
427_MEK_activation
428_RAF_phosphorylates_MEK
429_PKA_activation
430_CaMK_IV-mediated_phosphorylation_of_CREB
431_Calmodulin_induced_events
432_PKA-mediated_phosphorylation_of_CREB
433_t_cell_receptor_signaling_pathway
434_il-2_receptor_beta_chain_in_t_cell_activation
435_ATR_signaling_pathway
436_the_igf-1_receptor_and_longevity
437_Hydrolysis_of_LPC
438_Acyl_chain_remodelling_of_PC
439_Acyl_chain_remodelling_of_PS
440_Acyl_chain_remodelling_of_PI
441_Acyl_chain_remodelling_of_PG
442_Synthesis_of_PG
443_Acyl_chain_remodeling_of_CL
444_TCR_signaling_in_na_ve_CD4__T_cells
445_IL12_signaling_mediated_by_STAT4
446_inactivation_of_gsk3_by_akt_causes_accumulation_of_b-catenin_in_alveolar_macrophages
447_il12_and_stat4_dependent_signaling_pathway_in_th1_development
448_apoptotic_signaling_in_response_to_dna_damage
449_Purine_catabolism
450_Purine_salvage
451_Pyrimidine_biosynthesis
452_The_proton_buffering_model
453_Purine_ribonucleoside_monophosphate_biosynthesis
454_Pyrimidine_catabolism
455_Pyrimidine_salvage_reactions
456_Synthesis_of_IPs_in_the_nucleus
457_Synthesis_of_pyrophosphates_in_the_cytosol
458_Synthesis_of_IP3_and_IP4_in_the_cytosol
459_map_kinase_inactivation_of_smrt_corepressor
460_hiv-1_nef__negative_effector_of_fas_and_tnf
461_Potassium_transport_channels
462_Activation_of_G_protein_gated_Potassium_channels
463_Inhibition__of_voltage_gated_Ca2__channels_via_Gbeta/gamma_subunits
464_Ca2__activated_K__channels
465_Role_of_Calcineurin-dependent_NFAT_signaling_in_lymphocytes
466_Urokinase-type_plasminogen_activator_(uPA)_and_uPAR-mediated_signaling
467_ARMS-mediated_activation
468_Frs2-mediated_activation
469_p38MAPK_events
470_Signalling_to_p38_via_RIT_and_RIN
471_NGF-independant_TRKA_activation
472_TRKA_activation_by_NGF
473_Signalling_to_RAS
474_neuroregulin_receptor_degredation_protein-1_controls_erbb3_receptor_recycling
475_Class_IB_PI3K_non-lipid_kinase_events
476_IL5-mediated_signaling_events
477_Viral_mRNA_Translation
478_vRNA_Synthesis
479_Viral_RNP_Complexes_in_the_Host_Cell_Nucleus
480_NEP/NS2_Interacts_with_the_Cellular_Export_Machinery
481_Transport_of_HA_trimer__NA_tetramer_and_M2_tetramer_from_the_endoplasmic_reticulum_to_the_Golgi_Apparatus
482_Assembly_of_Viral_Components_at_the_Budding_Site
483_Budding
484_Packaging_of_Eight_RNA_Segments
485_Formation_of_annular_gap_junctions
486_Transport_of_connexins_along_the_secretory_pathway
487_Gap_junction_assembly
488_Oligomerization_of_connexins_into_connexons
489_Gap_junction_degradation
490_Microtubule-dependent_trafficking_of_connexons_from_Golgi_to_the_plasma_membrane
491_Netrin-mediated_signaling_events
492_role_of_mef2d_in_t-cell_apoptosis
493_stat3_signaling_pathway
494_IL2_signaling_events_mediated_by_PI3K
495_Processing_of_DNA_double-strand_break_ends
496_Assembly_of_the_RAD50-MRE11-NBS1_complex_at_DNA_double-strand_breaks
497_MRN_complex_relocalizes_to_nuclear_foci
498_Assembly_of_the_RAD51-ssDNA_nucleoprotein_complex
499_Presynaptic_phase_of_homologous_DNA_pairing_and_strand_exchange
500_Signaling_by_Type_1_Insulin-like_Growth_Factor_1_Receptor_(IGF1R)
501_IRS-related_events_triggered_by_IGF1R
502_SHC-related_events_triggered_by_IGF1R
503_Beta-catenin_phosphorylation_cascade
504_Degradation_of_beta-catenin_by_the_destruction_complex
505_Integrin_cell_surface_interactions
506_Hippo_signaling_cascade
507_Antagonism_of_Activin_by_Follistatin
508_Signaling_by_Activin
509_chrebp_regulation_by_carbohydrates_and_camp
510_il22_soluble_receptor_signaling_pathway
511_p53_pathway
512_cxcr4_signaling_pathway
513_erk_and_pi-3_kinase_are_necessary_for_collagen_binding_in_corneal_epithelia
514_ccr3_signaling_in_eosinophils
515_Regulation_of_CDC42_activity
516_IL1-mediated_signaling_events
517_TRAIL_signaling_pathway
518_Ephrin_B_reverse_signaling
519_Alpha-synuclein_signaling
520_AP-1_transcription_factor_network
521_erk1/erk2_mapk_signaling_pathway
522_mechanism_of_acetaminophen_activity_and_toxicity
523_cyclin_e_destruction_pathway
524_pelp1_modulation_of_estrogen_receptor_activity
525_Atypical_NF-kappaB_pathway
526_Acyl_chain_remodelling_of_PE
527_Hydrolysis_of_LPE
528_Synthesis_of_PE
529_Synthesis_of_PA
530_prion_pathway
531_Synthesis_of_PC
532_tnf/stress_related_signaling
533_proteolysis_and_signaling_pathway_of_notch
534_phosphoinositides_and_their_downstream_targets
535_Effects_of_Botulinum_toxin
536_Synthesis_and_interconversion_of_nucleotide_di-_and_triphosphates
537_Vitamin_B2_(riboflavin)_metabolism
538_Vitamin_B5_(pantothenate)_metabolism
539_Vitamin_C_(ascorbate)_metabolism
540_pkc-catalyzed_phosphorylation_of_inhibitory_phosphoprotein_of_myosin_phosphatase
541_no2-dependent_il-12_pathway_in_nk_cells
542_Digestion_of_dietary_lipid
543_Synthesis_of_IP2__IP__and_Ins_in_the_cytosol
544_stress_induction_of_hsp_regulation
545_Regulation_of_actin_dynamics_for_phagocytic_cup_formation
546_p53_signaling_pathway
547_ifn_alpha_signaling_pathway
548_phospholipase_c_signaling_pathway
549_GABA_B_receptor_activation
550_GABA_A_receptor_activation
551_Activation_of_Ca-permeable_Kainate_Receptor
552_Presynaptic_function_of_Kainate_receptors
553_Activation_of_Na-permeable_Kainate_Receptors
554_Activation_of_CaMK_IV
555_regulation_of_map_kinase_pathways_through_dual_specificity_phosphatases
556_SHC_activation
557_SHC-mediated_signalling
558_IRS_activation
559_PI3K_Cascade
560_PDE3B_signalling
561_mTOR_signalling
562_Inhibition_of_TSC_complex_formation_by_PKB
563_Cross-presentation_of_particulate_exogenous_antigens_(phagosomes)
564_Antigen_processing__Ubiquitination___Proteasome_degradation
565_Antigen_Presentation__Folding__assembly_and_peptide_loading_of_class_I_MHC
566_Cross-presentation_of_soluble_exogenous_antigens_(endosomes)
567_MHC_class_II_antigen_presentation
568_ER-Phagosome_pathway
569_Endosomal/Vacuolar_pathway
570_SOS-mediated_signalling
571_Signal_attenuation
572_Immunoregulatory_interactions_between_a_Lymphoid_and_a_non-Lymphoid_cell
573_Rap1_signalling
574_Signaling_events_mediated_by_TCPTP
575_Epidermal_Growth_Factor_Receptor_(EGFR)_signaling
576_Formation_of_the_Early_Elongation_Complex
577_Formation_of_RNA_Pol_II_elongation_complex
578_Fc-epsilon_receptor_I_signaling_in_mast_cells
579_Uncoating_of_the_Influenza_Virion
580_Transport_of_Ribonucleoproteins_into_the_Host_Nucleus
581_vRNP_Assembly
582_Influenza_Life_Cycle
583_Entry_of_Influenza_Virion_into_Host_Cell_via_Endocytosis
584_Fusion_of_the_Influenza_Virion_to_the_Host_Cell_Endosome
585_Viral_Messenger_RNA_Synthesis
586_cRNA_Synthesis
587_S1P5_pathway
588_Neurotransmitter_Clearance_In_The_Synaptic_Cleft
589_Dopamine_clearance_from_the_synaptic_cleft
590_calcium_signaling_by_hbx_of_hepatitis_b_virus
591_FoxO_family_signaling
592_sonic_hedgehog_receptor_ptc1_regulates_cell_cycle
593_Nuclear_Receptor_transcription_pathway
594_YAP1-_and_WWTR1_(TAZ)-stimulated_gene_expression
595_thrombin_signaling_and_protease-activated_receptors
596_Nonsense_Mediated_Decay_Independent_of_the_Exon_Junction_Complex
597_snRNP_Assembly
598_Generic_Transcription_Pathway
599_Notch-HLH_transcription_pathway
600_betaKlotho-mediated_ligand_binding
601_FGFR1c_and_Klotho_ligand_binding_and_activation
602_FGFR2c_ligand_binding_and_activation
603_FGFR2b_ligand_binding_and_activation
604_FGFR4_ligand_binding_and_activation
605_FGFR3b_ligand_binding_and_activation
606_FGFR3c_ligand_binding_and_activation
607_Glypican_1_network
608_cyclins_and_cell_cycle_regulation
609_trefoil_factors_initiate_mucosal_healing
610_g-protein_signaling_through_tubby_proteins
611_g-secretase_mediated_erbb4_signaling_pathway
612_Stabilization_of_p53
613_Autodegradation_of_the_E3_ubiquitin_ligase_COP1
614_p53-Dependent_G1_DNA_Damage_Response
615_Regulation_of_RAC1_activity
616_Transcriptional__activation_of__cell_cycle_inhibitor_p21
617_pten_dependent_cell_cycle_arrest_and_apoptosis
618_multi-step_regulation_of_transcription_by_pitx2
619_granzyme_a_mediated_apoptosis_pathway
620_S6K1-mediated_signalling
621_S6K1_signalling
622_Regulation_of_Signaling_by_NODAL
623_Release_of_eIF4E
624_Signaling_by_NODAL
625_AKT-mediated_inactivation_of_FOXO1A
626_Regulation_of_AMPK_activity_via_LKB1
627_Regulation_of_gene_expression_in_beta_cells
628_Regulation_of_Rheb_GTPase_activity_by_AMPK
629_COX_reactions
630_Miscellaneous_substrates
631_Eicosanoids
632_Fatty_acids
633_CYP2E1_reactions
634_Aromatic_amines_can_be_N-hydroxylated_or_N-dealkylated_by_CYP1A2
635_Regulation_of_gene_expression_in_late_stage_(branching_morphogenesis)_pancreatic_bud_precursor_cells
636_Regulation_of_gene_expression_in_early_pancreatic_precursor_cells
637_Transport_to_the_Golgi_and_subsequent_modification
638_ER_Quality_Control_Compartment_(ERQC)
639_Termination_of_O-glycan_biosynthesis
640_O-linked_glycosylation_of_mucins
641_PLK3_signaling_events
642_nerve_growth_factor_pathway_(ngf)
643_the_41bb-dependent_immune_response
644_TGF-beta_receptor_signaling
645_Insulin_receptor_mediated_signaling
646_Spry_regulation_of_FGF_signaling
647_Negative_regulation_of_FGFR_signaling
648_PI-3K_cascade
649_SHC-mediated_cascade
650_Phospholipase_C-mediated_cascade
651_FRS2-mediated_cascade
652_NRIF_signals_cell_death_from_the_nucleus
653_NRAGE_signals_death_through_JNK
654_NFG_and_proNGF_binds_to_p75NTR
655_NGF_processing
656_Insulin_receptor_recycling
657_Negative_regulation_of_the_PI3K/AKT_network
658_p75NTR_negatively_regulates_cell_cycle_via_SC1
659_NADE_modulates_death_signalling
660_mets_affect_on_macrophage_differentiation
661_LKB1_signaling_events
662_p73_transcription_factor_network
663_S1P2_pathway
664_hemoglobins_chaperone
665_CDC42_signaling_events
666_Vpu_mediated_degradation_of_CD4
667_ErbB1_downstream_signaling
668_Nef_and_signal_transduction
669_Interactions_of_Tat_with_host_cellular_proteins
670_Nef_Mediated_CD8_Down-regulation
671_Nef_Mediated_CD4_Down-regulation
672_Nef_mediated_downregulation_of_MHC_class_I_complex_cell_surface_expression
673_Nef_mediated_downregulation_of_CD28_cell_surface_expression
674_gata3_participate_in_activating_the_th2_cytokine_genes_expression
675_Serotonin_Neurotransmitter_Release_Cycle
676_Norepinephrine_Neurotransmitter_Release_Cycle
677_Depolarization_of_the_Presynaptic_Terminal_Triggers_the_Opening_of_Calcium_Channels
678_GABA_synthesis__release__reuptake_and_degradation
679_Acetylcholine_Neurotransmitter_Release_Cycle
680_Dopamine_Neurotransmitter_Release_Cycle
681_Glutamate_Neurotransmitter_Release_Cycle
682_GABA_synthesis
683_EGFR-dependent_Endothelin_signaling_events
684_Nonsense_Mediated_Decay_Enhanced_by_the_Exon_Junction_Complex
685_Stabilization_of_mRNA_by_HuR
686_Destabilization_of_mRNA_by_KSRP
687_Destabilization_of_mRNA_by_Tristetraprolin_(TTP)
688_Destabilization_of_mRNA_by_Butyrate_Response_Factor_1_(BRF1)
689_Destabilization_of_mRNA_by_AUF1_(hnRNP_D0)
690_mRNA_Decay_by_5__to_3__Exoribonuclease
691_mRNA_Decay_by_3__to_5__Exoribonuclease
692_FGFR1c_ligand_binding_and_activation
693_FGFR1b_ligand_binding_and_activation
694_GRB2_events_in_EGFR_signaling
695_EGFR_interacts_with_phospholipase_C-gamma
696_GAB1_signalosome
697_SHC1_events_in_EGFR_signaling
698_Fibroblast_Growth_Factor_Receptor_(FGFR)_signaling
699_EGFR_downregulation
700_Fanconi_anemia_pathway
701_ifn_gamma_signaling_pathway
702_pertussis_toxin-insensitive_ccr5_signaling_in_macrophage
703_tsp-1_induced_apoptosis_in_microvascular_endothelial_cell
704_regulation_of_p27_phosphorylation_during_cell_cycle_progression
705_spliceosomal_assembly
706_generation_of_amyloid_b-peptide_by_ps1
707_Transport_of_fatty_acids
708_a6b1_and_a6b4_Integrin_signaling
709_alpha-synuclein_and_parkin-mediated_proteolysis_in_parkinson_s_disease
710_nfat_and_hypertrophy_of_the_heart_
711_protein_kinase_a_at_the_centrosome
712_S1P3_pathway
713_role_of_parkin_in_ubiquitin-proteasomal_pathway
714_signal_transduction_through_il1r
715_Sumoylation_by_RanBP2_regulates_transcriptional_repression
716_amb2_Integrin_signaling
717_Wnt_signaling_network
718_role_of_brca1_brca2_and_atr_in_cancer_susceptibility
719_transcriptional_activation_of_dbpb_from_mrna
720_Neurotrophic_factor-mediated_Trk_receptor_signaling
721_the_co-stimulatory_signal_during_t-cell_activation
722_Methylation
723_Glucuronidation
724_Cytosolic_sulfonation_of_small_molecules
725_Monoamines_are_oxidized_to_aldehydes_by_MAOA_and_MAOB__producing_NH3_and_H2O2
726_Alcohol_catabolism
727_Metabolism_of_Angiotensinogen_to_Angiotensins
728_Synthesis__Secretion__and_Inactivation_of_Glucagon-like_Peptide-1_(GLP-1)
729_Synthesis__Secretion__and_Inactivation_of_Glucose-dependent_Insulinotropic_Polypeptide_(GIP)
730_Mitochondrial_Protein_Import
731_Insulin_Processing
732_Synthesis__Secretion__and_Deacylation_of_Ghrelin
733_Peptide_hormone_biosynthesis
734_Glycoprotein_hormones
735_transcription_factor_creb_and_its_extracellular_signals
736_Aurora_A_signaling
737_ERK/MAPK_targets
738_ERKs_are_inactivated
739_CREB_phosphorylation
740_activated_TAK1_mediates_p38_MAPK_activation
741_ERK_activation
742_ERK1_activation
743_ERK2_activation
744_Activation_of_the_AP-1_family_of_transcription_factors
745_Toll_Like_Receptor_3_(TLR3)_Cascade
746_Visual_signal_transduction__Cones
747_Facilitative_Na_-independent_glucose_transporters
748_Glucose_transport
749_Regulation_of_Glucokinase_by_Glucokinase_Regulatory_Protein
750_Proton/oligonucleotide_cotransporters
751_Hexose_transport
752_Organic_anion_transporters
753_Amino_acid_transport_across_the_plasma_membrane
754_HS-GAG_biosynthesis
755_HS-GAG_degradation
756_A_tetrasaccharide_linker_sequence_is_required_for_GAG_synthesis
757_Keratan_sulfate_biosynthesis
758_Keratan_sulfate_degradation
759_Hyaluronan_uptake_and_degradation
760_Fanconi_Anemia_pathway
761_Regulation_of_the_Fanconi_anemia_pathway
762_Gap-filling_DNA_repair_synthesis_and_ligation_in_TC-NER
763_Repair_synthesis_for_gap-filling_by_DNA_polymerase_in_TC-NER
764_Formation_of_transcription-coupled_NER_(TC-NER)_repair_complex
765_Dual_incision_reaction_in_TC-NER
766_Adherens_junctions_interactions
767_N-cadherin_signaling_events
768_RNA_Polymerase_III_Transcription_Initiation_From_Type_2_Promoter
769_RNA_Polymerase_III_Transcription_Initiation_From_Type_3_Promoter
770_RNA_Polymerase_III_Transcription_Initiation_From_Type_1_Promoter
771_RNA_Polymerase_III_Chain_Elongation
772_RNA_Polymerase_III_Transcription_Termination
773_Ras_signaling_in_the_CD4__TCR_pathway
774_fmlp_induced_chemokine_gene_expression_in_hmc-1_cells
775_RNA_Polymerase_II_Transcription_Pre-Initiation_And_Promoter_Opening
776_RNA_Polymerase_II_Transcription_Initiation_And_Promoter_Clearance
777_RNA_Polymerase_II_Pre-transcription_Events
778_RNA_Pol_II_CTD_phosphorylation_and_interaction_with_CE
779_RNA_Polymerase_II_Transcription_Elongation
780_RNA_Polymerase_II_Transcription_Initiation
781_RNA_Polymerase_II_Promoter_Escape
782_PECAM1_interactions
783_Basigin_interactions
784_Factors_involved_in_megakaryocyte_development_and_platelet_production
785_Kinesins
786_Common_Pathway
787_Dissolution_of_Fibrin_Clot
788_Cell_surface_interactions_at_the_vascular_wall
789_Tie2_Signaling
790_CRMPs_in_Sema3A_signaling
791_Other_semaphorin_interactions
792_Sema4D_in_semaphorin_signaling
793_SEMA3A-Plexin_repulsion_signaling_by_inhibiting_Integrin_adhesion
794_Sema3A_PAK_dependent_Axon_repulsion
795_Sema4D_mediated_inhibition_of_cell_attachment_and_migration
796_Sema4D_induced_cell_migration_and_growth-cone_collapse
797_Regulation_of_nuclear_SMAD2/3_signaling
798_Direct_p53_effectors
799_phospholipase_c-epsilon_pathway
800_ion_channels_and_their_functional_role_in_vascular_endothelium
801_oxidative_stress_induced_gene_expression_via_nrf2
802_control_of_skeletal_myogenesis_by_hdac_and_calcium/calmodulin-dependent_kinase_(camk)
803_polyadenylation_of_mrna
804_Aurora_B_signaling
805_Calcium_signaling_in_the_CD4__TCR_pathway
806_ALK1_signaling_events
807_signaling_pathway_from_g-protein_families
808_keratinocyte_differentiation
809_E-cadherin_signaling_in_the_nascent_adherens_junction
810_CXCR3-mediated_signaling_events
811_Signaling_events_mediated_by_PTP1B
812_IL8-_and_CXCR1-mediated_signaling_events
813_RXR_and_RAR_heterodimerization_with_other_nuclear_receptor
814_Sphingosine_1-phosphate_(S1P)_pathway
815_ErbB4_signaling_events
816_Calcineurin-regulated_NFAT-dependent_transcription_in_lymphocytes
817_GMCSF-mediated_signaling_events
818_Hypoxic_and_oxygen_homeostasis_regulation_of_HIF-1-alpha
819_Glucocorticoid_receptor_regulatory_network
820_Trk_receptor_signaling_mediated_by_PI3K_and_PLC-gamma
821_ATM_pathway
822_activation_of_camp-dependent_protein_kinase_pka
823_human_cytomegalovirus_and_map_kinase_pathways
824_Validated_targets_of_C-MYC_transcriptional_activation
825_VEGFR3_signaling_in_lymphatic_endothelium
826_Formation_of_ATP_by_chemiosmotic_coupling
827_Respiratory_electron_transport
828_Citric_acid_cycle_(TCA_cycle)
829_Regulation_of_pyruvate_dehydrogenase_(PDH)_complex
830_Cori_Cycle_(interconversion_of_glucose_and_lactate)
831_nfkb_activation_by_nontypeable_hemophilus_influenzae
832_The_fatty_acid_cycling_model
833_Regulation_of_ornithine_decarboxylase_(ODC)
834_Catecholamine_biosynthesis
835_Thyroxine_biosynthesis
836_Sulfur_amino_acid_metabolism
837_endocytotic_role_of_ndk_phosphins_and_dynamin
838_inhibition_of_matrix_metalloproteinases
839_phosphorylation_of_mek1_by_cdk5/p35_down_regulates_the_map_kinase_pathway
840_hiv-1_defeats_host-mediated_resistance_by_cem15
841_intrinsic_prothrombin_activation_pathway
842_Signaling_events_mediated_by_Hepatocyte_Growth_Factor_Receptor_(c-Met)
843_tgf_beta_signaling_pathway
844_lissencephaly_gene_(lis1)_in_neuronal_migration_and_development
845_PDGF_receptor_signaling_network
846_JNK_(c-Jun_kinases)_phosphorylation_and__activation_mediated_by_activated_human_TAK1
847_Toll_Like_Receptor_10_(TLR10)_Cascade
848_Trafficking_and_processing_of_endosomal_TLR
849_TAK1_activates_NFkB_by_phosphorylation_and_activation_of_IKKs_complex
850_IRAK2_mediated_activation_of_TAK1_complex
851_IRAK1_recruits_IKK_complex
852_MyD88_cascade_initiated_on_plasma_membrane
853_overview_of_telomerase_rna_component_gene_hterc_transcriptional_regulation
854_cycling_of_ran_in_nucleocytoplasmic_transport
855_il-10_anti-inflammatory_signaling_pathway
856_mTOR_signaling_pathway
857_Regulation_of_Insulin-like_Growth_Factor_(IGF)_Transport_and_Uptake_by_Insulin-like_Growth_Factor_Binding_Proteins_(IGFBPs)
858_Activation_of_Chaperone_Genes_by_ATF6-alpha
859_Activation_of_Chaperones_by_ATF6-alpha
860_Activation_of_Chaperone_Genes_by_XBP1(S)
861_Activation_of_Chaperones_by_IRE1alpha
862_Activation_of_Genes_by_ATF4
863_PERK_regulated_gene_expression
864_Regulation_of_p38-alpha_and_p38-beta
865_Na_/Cl-_dependent_neurotransmitter_transporters
866_Metal_ion_SLC_transporters
867_Proton-coupled_monocarboxylate_transport
868_Zinc_efflux_and_compartmentalization_by_the_SLC30_family
869_Signaling_by_FGFR4_mutants
870_t(4_14)_translocations_of_FGFR3
871_Abnormal_metabolism_in_phenylketonuria
872_Signaling_by_FGFR2_amplification_mutants
873_Activated_point_mutants_of_FGFR2
874_Signaling_by_activated_point_mutants_of_FGFR3
875_Signaling_by_FGFR3_mutants
876_Formation_of_incision_complex_in_GG-NER
877_DNA_Damage_Recognition_in_GG-NER
878_Gap-filling_DNA_repair_synthesis_and_ligation_in_GG-NER
879_Dual_incision_reaction_in_GG-NER
880_Processing_of_DNA_ends_prior_to_end_rejoining
881_Nonhomologous_End-joining_(NHEJ)
882_Transcription-coupled_NER_(TC-NER)
883_Repair_synthesis_of_patch__27-30_bases_long__by_DNA_polymerase
884_RNA_Polymerase_I_Promoter_Opening
885_RNA_Polymerase_I_Promoter_Escape
886_RNA_Polymerase_I_Transcription_Initiation
887_RNA_Polymerase_I_Transcription_Termination
888_RNA_Polymerase_III_Abortive_And_Retractive_Initiation
889_Arf6_trafficking_events
890_Cleavage_of_Growing_Transcript_in_the_Termination_Region
891_Processing_of_Capped_Intron-Containing_Pre-mRNA
892_mRNA_Capping
893_U2_Dependent_Splicing
894_mRNA_3_-end_processing
895_mRNA_Splicing_-_Minor_Pathway
896_Transport_of_Mature_mRNA_derived_from_an_Intron-Containing_Transcript
897_Generation_of_intrinsic_Factor_X_activating_complex
898_Generation_of_extrinsic_Factor_X_activating_complex
899_Activation_of_Rac
900_Inactivation_of_Cdc42_and_Rac
901_EphrinA-EPHA_pathway
902_NCAM1_interactions
903_NCAM_signaling_for_neurite_out-growth
904_DCC_mediated_attractive_signaling
905_Netrin-1_signaling
906_Role_of_second_messengers_in_netrin-1_signaling
907_Netrin_mediated_repulsion_signals
908_Regulation_of_Commissural_axon_pathfinding_by_Slit_and_Robo
909_Signaling_by_Robo_receptor
910_Regulation_of_gene_expression_in_endocrine-committed_(NEUROG3_)_progenitor_cells
911_corticosteroids_and_cardioprotection
912_LPA4-mediated_signaling_events
913_Cohesin_Loading_onto_Chromatin
914_Mitotic_Telophase/Cytokinesis
915_Mitotic_Metaphase/Anaphase_Transition
916_Condensation_of_Prometaphase_Chromosomes
917_Initiation_of_Nuclear_Envelope_Reformation
918_Separation_of_Sister_Chromatids
919_inhibition_of_huntingtons_disease_neurodegeneration_by_histone_deacetylase_inhibitors
920_opposing_roles_of_aif_in_apoptosis_and_cell_survival
921_Ephrin_A__reverse_signaling
922_Class_I_PI3K_signaling_events_mediated_by_Akt
923_IL12-mediated_signaling_events
924_hypoxia_and_p53_in_the_cardiovascular_system
925_Plasma_membrane_estrogen_receptor_signaling
926_ionomycin_and_phorbal_ester_signaling_pathway
927_HIF-1-alpha_transcription_factor_network
928_how_progesterone_initiates_the_oocyte_maturation
929_DNA-PK_pathway_in_nonhomologous_end_joining
930_regulation_of_eif2
931_Regulation_of_nuclear_beta_catenin_signaling_and_target_gene_transcription
932_internal_ribosome_entry_pathway
933_rna_polymerase_iii_transcription
934_sumoylation_as_a_mechanism_to_modulate_ctbp-dependent_gene_responses
935_regulators_of_bone_mineralization
936_apoptotic_dna-fragmentation_and_tissue_homeostasis
937__-arrestins_in_gpcr_desensitization
938_eNOS_activation
939_NOSIP_mediated_eNOS_trafficking
940_NOSTRIN_mediated_eNOS_trafficking
941_AMPK_inhibits_chREBP_transcriptional_activation_activity
942_PP2A-mediated_dephosphorylation_of_key_metabolic_factors
943_ChREBP_activates_metabolic_gene_expression
944_nf-kb_signaling_pathway
945_Tetrahydrobiopterin_(BH4)_synthesis__recycling__salvage_and_regulation
946_wnt_signaling_pathway
947_Heme_degradation
948_Heme_biosynthesis
949_Endogenous_sterols
950_vegf_hypoxia_and_angiogenesis
951_dicer_pathway
952_G2/M_DNA_replication_checkpoint
953_Stabilization_and_expansion_of_the_E-cadherin_adherens_junction
954_Processive_synthesis_on_the_C-strand_of_the_telomere
955_Removal_of_the_Flap_Intermediate_from_the_C-strand
956_Telomere_C-strand_synthesis_initiation
957_Polymerase_switching_on_the_C-strand_of_the_telomere
958_Telomere_Extension_By_Telomerase
959_Telomere_C-strand_(Lagging_Strand)_Synthesis
960_Deposition_of_New_CENPA-containing_Nucleosomes_at_the_Centromere
961_Signaling_events_mediated_by_the_Hedgehog_family
962_Activation_of_Matrix_Metalloproteinases
963_Degradation_of_collagen
964_Molecules_associated_with_elastic_fibres
965_Fibronectin_matrix_formation
966_Elastic_fibre_formation
967_Anchoring_fibril_formation
968_Crosslinking_of_collagen_fibrils
969_Collagen_biosynthesis_and_modifying_enzymes
970_Assembly_of_collagen_fibrils_and_other_multimeric_structures
971_LPA_receptor_mediated_events
972_skeletal_muscle_hypertrophy_is_regulated_via_akt-mtor_pathway
973_regulation_of_spermatogenesis_by_crem
974_Proteolytic_cleavage_of_SNARE_complex_proteins
975_BoNT_Light_Chain_Types_B__D__and_F_cleave_VAMP/Synaptobrevin
976_BoNT_Light_Chain_Types_A__C1__E_cleave_SNAP-25
977_Signaling_by_FGFR_mutants
978_Signaling_by_FGFR1_amplification_mutants
979_Signaling_by_FGFR1_fusion_mutants
980_Signaling_by_activated_point_mutants_of_FGFR1
981_igf-1_signaling_pathway
982_Cellular_roles_of_Anthrax_toxin
983_SLBP_Dependent_Processing_of_Replication-Dependent_Histone_Pre-mRNAs
984_SLBP_independent_Processing_of_Histone_Pre-mRNAs
985_Thrombin_signalling_through_proteinase_activated_receptors_(PARs)
986_ADP_signalling_through_P2Y_purinoceptor_1
987_Transport_of_the_SLBP_independent_Mature_mRNA
988_Transport_of_Mature_mRNA_Derived_from_an_Intronless_Transcript
989_Integrin_alphaIIb_beta3_signaling
990_GRB2_SOS_provides_linkage_to_MAPK_signaling_for_Intergrins
991_Constitutive_Signaling_by_NOTCH1_PEST_Domain_Mutants
992_Constitutive_Signaling_by_NOTCH1_HD_PEST_Domain_Mutants
993_Constitutive_Signaling_by_NOTCH1_t(7_9)(NOTCH1_M1580_K2555)_Translocation_Mutant
994_Constitutive_Signaling_by_NOTCH1_HD_Domain_Mutants
995_SHP2_signaling
996_CD40/CD40L_signaling
997_angiotensin_ii_mediated_activation_of_jnk_pathway_via_pyk2_dependent_signaling
998_a4b7_Integrin_signaling
999_Golgi_Associated_Vesicle_Biogenesis
1000_Lysosome_Vesicle_Biogenesis
1001_Cam-PDE_1_activation
1002_COPII_(Coat_Protein_2)_Mediated_Vesicle_Transport
1003_COPI_Mediated_Transport
1004_Clathrin_derived_vesicle_budding
1005_Regulation_of_APC/C_activators_between_G1/S_and_early_anaphase
1006_Phosphorylation_of_Emi1
1007_CDC6_association_with_the_ORC_origin_complex
1008_CDT1_association_with_the_CDC6_ORC_origin_complex
1009_Assembly_of_the_pre-replicative_complex
1010_Assembly_of_the_ORC_complex_at_the_origin_of_replication
1011_trka_receptor_signaling_pathway
1012_ras-independent_pathway_in_nk_cell-mediated_cytotoxicity
1013_CHL1_interactions
1014_Receptor-ligand_binding_initiates_the_second_proteolytic_cleavage_of_Notch_receptor
1015_TCR_signaling_in_na_ve_CD8__T_cells
1016_il_4_signaling_pathway
1017_DSCAM_interactions
1018_Signal_regulatory_protein_(SIRP)_family_interactions
1019_Type_I_hemidesmosome_assembly
1020_Regulation_of_IFNA_signaling
1021_Localization_of_the_PINCH-ILK-PARVIN_complex_to_focal_adhesions
1022_Cell-extracellular_matrix_interactions
1023_Tight_junction_interactions
1024_Nectin/Necl__trans_heterodimerization
1025_effects_of_calcineurin_in_keratinocyte_differentiation
1026_nuclear_receptors_coordinate_the_activities_of_chromatin_remodeling_complexes_and_coactivators_to_facilitate_initiation_of_transcription_in_carcinoma_cells
1027_mapkinase_signaling_pathway
1028_btg_family_proteins_and_cell_cycle_regulation
1029_EPHB_forward_signaling
1030_ctcf__first_multivalent_nuclear_factor
1031_bcr_signaling_pathway
1032_Integrin-linked_kinase_signaling
1033_yaci_and_bcma_stimulation_of_b_cell_immune_responses
1034_PAR4-mediated_thrombin_signaling_events
1035_sodd/tnfr1_signaling_pathway
1036_Electron_Transport_from_NADPH_to_Ferredoxin
1037_rho-selective_guanine_exchange_factor_akap13_mediates_stress_fiber_formation
1038_Mitochondrial_Iron-Sulfur_Cluster_Biogenesis
1039_Glutathione_synthesis_and_recycling
1040_Glutathione_conjugation
1041_deregulation_of_cdk5_in_alzheimers_disease
1042_ATF-2_transcription_factor_network
1043_Autodegradation_of_Cdh1_by_Cdh1_APC/C
1044_metabolism_of_anandamide_an_endogenous_cannabinoid
1045_APC/C_Cdc20_mediated_degradation_of_Securin
1046_APC/C_Cdc20_mediated_degradation_of_Cyclin_B
1047_APC/C_Cdh1_mediated_degradation_of_Cdc20_and_other_APC/C_Cdh1_targeted_proteins_in_late_mitosis/early_G1
1048_Conversion_from_APC/C_Cdc20_to_APC/C_Cdh1_in_late_anaphase
1049_SCF-beta-TrCP_mediated_degradation_of_Emi1
1050_APC/C_Cdc20_mediated_degradation_of_mitotic_proteins
1051_Phosphorylation_of_the_APC/C
1052_alk_in_cardiac_myocytes
1053_double_stranded_rna_induced_gene_expression
1054_Integrins_in_angiogenesis
1055_melanocyte_development_and_pigmentation_pathway
1056_Amyloids
1057_Signaling_by_constitutively_active_EGFR
1058_Mtb_iron_assimilation_by_chelation
1059_Translocation_of_BoNT_Light_chain
1060_Neurotoxicity_of_Botulinum_toxins
1061_attenuation_of_gpcr_signaling
1062_lck_and_fyn_tyrosine_kinases_in_initiation_of_tcr_activation
1063_Small_Interfering_RNA_(siRNA)_Biogenesis
1064_MicroRNA_(miRNA)_Biogenesis
1065_C6_deamination_of_adenosine
1066_Formation_of_editosomes_by_ADAR_proteins
1067_Elevation_of_cytosolic_Ca2__levels
1068_Platelet_sensitization_by_LDL
1069_Reduction_of_cytosolic_Ca___levels
1070_Prostacyclin_signalling_through_prostacyclin_receptor
1071_cGMP_effects
1072_Nitric_oxide_stimulates_guanylate_cyclase
1073_Platelet_Adhesion_to_exposed_collagen
1074_Amino_acid_and_oligopeptide_SLC_transporters
1075_Mineralocorticoid_biosynthesis
1076_Glucocorticoid_biosynthesis
1077_Vitamin_D_(calciferol)_metabolism
1078_Androgen_biosynthesis
1079_Syndecan-3-mediated_signaling_events
1080_MyD88_Mal_cascade_initiated_on_plasma_membrane
1081_Toll_Like_Receptor_4_(TLR4)_Cascade
1082_Interleukin-1_signaling
1083_Interleukin-1_processing
1084_Transfer_of_LPS_from_LBP_carrier_to_CD14
1085_PAR1-mediated_thrombin_signaling_events
1086_Cdc20_Phospho-APC/C_mediated_degradation_of_Cyclin_A
1087_Nephrin_interactions
1088_Interferon_alpha/beta_signaling
1089_Interferon_gamma_signaling
1090_Regulation_of_cytoskeletal_remodeling_and_cell_spreading_by_IPP_complex_components
1091_Regulation_of_IFNG_signaling
1092_ISG15_antiviral_mechanism
1093_IRAK1_recruits_IKK_complex_upon_TLR7/8_or_9_stimulation
1094_IRAK2_mediated_activation_of_TAK1_complex_upon_TLR7/8_or_9_stimulation
1095_Cyclin_A/B1_associated_events_during_G2/M_transition
1096_Cyclin_B2_mediated_events
1097_Phosphorylation_of_proteins_involved_in_the_G2/M_transition_by_Cyclin_A_Cdc2_complexes
1098_Polo-like_kinase_mediated_events
1099_Regulation_of_PLK1_Activity_at_G2/M_Transition
1100_Recruitment_of_mitotic_centrosome_proteins_and_complexes
1101_Loss_of_proteins_required_for_interphase_microtubule_organization__from_the_centrosome
1102_Recruitment_of_NuMA_to_mitotic_centrosomes
1103_Validated_nuclear_estrogen_receptor_beta_network
1104_p38_signaling_mediated_by_MAPKAP_kinases
1105_EGF_receptor_(ErbB1)_signaling_pathway
1106_epo_signaling_pathway
1107_ALK2_signaling_events
1108_cell_to_cell_adhesion_signaling
1109_ucalpain_and_friends_in_cell_spread
1110_tnfr1_signaling_pathway
1111_Xenobiotics
1112_phospholipase_c_delta_in_phospholipid_associated_cell_signaling
1113_nitric_oxide_signaling_pathway
1114_hypoxia-inducible_factor_in_the_cardivascular_system
1115_PDGFR-beta_signaling_pathway
1116_bioactive_peptide_induced_signaling_pathway
1117_transcription_regulation_by_methyltransferase_of_carm1
1118_Trk_receptor_signaling_mediated_by_the_MAPK_pathway
1119_S1P1_pathway
1120_role_of_erbb2_in_signal_transduction_and_oncology
1121_lectin_induced_complement_pathway
1122_Aurora_C_signaling
1123_west_nile_virus
1124_Abacavir_transmembrane_transport
1125_Uptake_of_Carbon_Dioxide_and_Release_of_Oxygen_by_Erythrocytes
1126_Uptake_of_Oxygen_and_Release_of_Carbon_Dioxide_by_Erythrocytes
1127_Cytosolic_Iron-sulfur_Cluster_Assembly
1128_Abacavir_metabolism
1129_Reversible_Hydration_of_Carbon_Dioxide
1130_Meiotic_Recombination
1131_actions_of_nitric_oxide_in_the_heart
1132_chaperones_modulate_interferon_signaling_pathway
1133_Class_I_PI3K_signaling_events
1134_RSK_activation
1135_CREB_phosphorylation_through_the_activation_of_Adenylate_Cyclase
1136_CREB_phosphorylation_through_the_activation_of_Ras
1137_Ras_activation_uopn_Ca2__infux_through_NMDA_receptor
1138_Hedgehog_signaling_events_mediated_by_Gli_proteins
1139_Defensins
1140_Alpha-defensins
1141_Phosphorylation_of_CD3_and_TCR_zeta_chains
1142_Translocation_of_ZAP-70_to_Immunological_synapse
1143_Generation_of_second_messenger_molecules
1144_Downstream_TCR_signaling
1145_Costimulation_by_the_CD28_family
1146_CD28_co-stimulation
1147_CD28_dependent_PI3K/Akt_signaling
1148_CD28_dependent_Vav1_pathway
1149_CTLA4_inhibitory_signaling
1150_PD-1_signaling
1151_Glypican_2_network
1152_Effects_of_PIP2_hydrolysis
1153_b_cell_survival_pathway
1154_Adrenaline_signalling_through_Alpha-2_adrenergic_receptor
1155_p130Cas_linkage_to_MAPK_signaling_for_integrins
1156_BMP_receptor_signaling
1157_Platelet_degranulation
1158_Disinhibition_of_SNARE_formation
1159_Response_to_elevated_platelet_cytosolic_Ca2_
1160_S1P4_pathway
1161_eukaryotic_protein_translation
1162_C-MYB_transcription_factor_network
1163_role_of_pi3k_subunit_p85_in_regulation_of_actin_organization_and_cell_migration
1164_PLK2_and_PLK4_events
1165_Constitutive_PI3K/AKT_Signaling_in_Cancer
1166_Stimuli-sensing_channels
1167_ceramide_signaling_pathway
1168_Ribosomal_scanning_and_start_codon_recognition
1169_GTP_hydrolysis_and_joining_of_the_60S_ribosomal_subunit
1170_Activation_of_the_mRNA_upon_binding_of_the_cap-binding_complex_and_eIFs__and_subsequent_binding_to_43S
1171_Translation_initiation_complex_formation
1172_Formation_of_a_pool_of_free_40S_subunits
1173_Formation_of_the_ternary_complex__and_subsequently__the_43S_complex
1174_Post-transcriptional_Silencing_By_Small_RNAs
1175_Pre-NOTCH_Processing_in_Golgi
1176_Activated_NOTCH1_Transmits_Signal_to_the_Nucleus
1177_NOTCH1_Intracellular_Domain_Regulates_Transcription
1178_NOTCH2_Activation_and_Transmission_of_Signal_to_the_Nucleus
1179_Signaling_by_NOTCH3
1180_Signaling_by_NOTCH4
1181_Recognition_and_association_of_DNA_glycosylase_with_site_containing_an_affected_purine
1182_Cleavage_of_the_damaged_purine
1183_overview_of_telomerase_protein_component_gene_htert_transcriptional_regulation
1184_phospholipids_as_signalling_intermediaries
1185_ABC-family_proteins_mediated_transport
1186_Interleukin-6_signaling
1187_Interleukin-7_signaling
1188_Growth_hormone_receptor_signaling
1189_Prolactin_receptor_signaling
1190_Interleukin-2_signaling
1191_Interleukin_receptor_SHC_signaling
1192_Interleukin-3__5_and_GM-CSF_signaling
1193_Regulation_of_signaling_by_CBL
1194_multiple_antiapoptotic_pathways_from_igf-1r_signaling_lead_to_bad_phosphorylation
1195_E-cadherin_signaling_in_keratinocytes
1196_Golgi_Cisternae_Pericentriolar_Stack_Reorganization
1197_Loss_of_Nlp_from_mitotic_centrosomes
1198_Activation_of_NIMA_Kinases_NEK9__NEK6__NEK7
1199_Clearance_of_Nuclear_Envelope_Membranes_from_Chromatin
1200_MASTL_Facilitates_Mitotic_Progression
1201_Mitotic_Prometaphase
1202_Resolution_of_Sister_Chromatid_Cohesion
1203_bone_remodeling
1204_Coregulation_of_Androgen_receptor_activity
1205_Validated_nuclear_estrogen_receptor_alpha_network
1206_mtor_signaling_pathway
1207_role_of_mal_in_rho-mediated_activation_of_srf
1208_il_2_signaling_pathway
1209_Antigen_Activates_B_Cell_Receptor_Leading_to_Generation_of_Second_Messengers
1210_Activation_of_NF-kappaB_in_B_Cells
1211_il_3_signaling_pathway
1212_VEGFR1_specific_signals
1213_PIP3_activates_AKT_signaling
1214_Activation_of_RAS_in_B_Cells
1215_AKT_phosphorylates_targets_in_the_nucleus
1216_AKT_phosphorylates_targets_in_the_cytosol
1217_Nectin_adhesion_pathway
1218_influence_of_ras_and_rho_proteins_on_g1_to_s_transition
1219_p75(NTR)-mediated_signaling
1220_Presenilin_action_in_Notch_and_Wnt_signaling
1221_cdk_regulation_of_dna_replication
1222_regulation_of_pgc-1a
1223_Asparagine_N-linked_glycosylation
1224_Attachment_of_GPI_anchor_to_uPAR
1225_Synthesis_of_UDP-N-acetyl-glucosamine
1226_Calnexin/calreticulin_cycle
1227_N-glycan_trimming_in_the_ER_and_Calnexin/Calreticulin_cycle
1228_alpha-linolenic_acid_(ALA)_metabolism
1229_Synthesis_of_PIPs_at_the_late_endosome_membrane
1230_Synthesis_of_Leukotrienes_(LT)_and_Eoxins_(EX)
1231_Synthesis_of_Prostaglandins_(PG)_and_Thromboxanes_(TX)
1232_Arachidonic_acid_metabolism
1233_Linoleic_acid_(LA)_metabolism
1234_Synthesis_of_15-eicosatetraenoic_acid_derivatives
1235_Synthesis_of_5-eicosatetraenoic_acids
1236_Ceramide_signaling_pathway
1237_Post-chaperonin_tubulin_folding_pathway
1238_Association_of_TriC/CCT_with_target_proteins_during_biosynthesis
1239_Folding_of_actin_by_CCT/TriC
1240_Formation_of_tubulin_folding_intermediates_by_CCT/TriC
1241_Prefoldin_mediated_transfer_of_substrate__to_CCT/TriC
1242_L13a-mediated_translational_silencing_of_Ceruloplasmin_expression
1243_Scavenging_of_Heme_from_Plasma
1244_PLC-mediated_hydrolysis_of_PIP2
1245_Meiotic_Synapsis
1246_Packaging_Of_Telomere_Ends
1247_regulation_of_splicing_through_sam68
1248_integrin_signaling_pathway
1249_acetylation_and_deacetylation_of_rela_in_nucleus
1250_PLK1_signaling_events
1251_Signaling_events_mediated_by_Stem_cell_factor_receptor_(c-Kit)
1252_role_of_mitochondria_in_apoptotic_signaling
1253_CS/DS_degradation
1254_Dermatan_sulfate_biosynthesis
1255_Chondroitin_sulfate_biosynthesis
1256_Alpha4_beta1_integrin_signaling_events
1257_cdc25_and_chk1_regulatory_pathway_in_response_to_dna_damage
1258_Transport_of_organic_anions
1259_Eukaryotic_Translation_Termination
1260_Peptide_chain_elongation
1261_Binding_of_RNA_by_Insulin-like_Growth_Factor-2_mRNA_Binding_Proteins_(IGF2BPs/IMPs/VICKZs)
1262_Recycling_of_eIF2_GDP
1263_Eukaryotic_Translation_Elongation
1264_SRP-dependent_cotranslational_protein_targeting_to_membrane
1265_Muscarinic_acetylcholine_receptors
1266_Amine_ligand-binding_receptors
1267_Relaxin_receptors
1268_Formyl_peptide_receptors_bind_formyl_peptides_and_many_other_ligands
1269_Orexin_and_neuropeptides_FF_and_QRFP_bind_to_their_respective_receptors
1270_Vasopressin-like_receptors
1271_Tachykinin_receptors_bind_tachykinins
1272_Chemokine_receptors_bind_chemokines
1273_Peptide_ligand-binding_receptors
1274_Class_A/1_(Rhodopsin-like_receptors)
1275_Removal_of_DNA_patch_containing_abasic_residue
1276_Base-free_sugar-phosphate_removal_via_the_single-nucleotide_replacement_pathway
1277_Resolution_of_AP_sites_via_the_single-nucleotide_replacement_pathway
1278_Resolution_of_AP_sites_via_the_multiple-nucleotide_patch_replacement_pathway
1279_Displacement_of_DNA_glycosylase_by__APE1
1280_Caspase_Cascade_in_Apoptosis
1281_cell_cycle__g2/m_checkpoint
1282_Transport_of_inorganic_cations/anions_and_amino_acids/oligopeptides
1283_ABCA_transporters_in_lipid_homeostasis
1284_Sodium/Proton_exchangers
1285_Canonical_NF-kappaB_pathway
1286_Leading_Strand_Synthesis
1287_Unwinding_of_DNA
1288_CDK-mediated_phosphorylation_and_removal_of_Cdc6
1289_Orc1_removal_from_chromatin
1290_Switching_of_origins_to_a_post-replicative_state
1291_DNA_replication_initiation
1292_p38_mapk_signaling_pathway
1293_Polymerase_switching
1294_Endogenous_TLR_signaling
1295_er_associated_degradation_(erad)_pathway
1296_Validated_transcriptional_targets_of_AP1_family_members_Fra1_and_Fra2
1297_Syndecan-2-mediated_signaling_events
1298_BCR_signaling_pathway
1299_signal_dependent_regulation_of_myogenesis_by_corepressor_mitr
1300_Alpha9_beta1_integrin_signaling_events
1301_role_of_nicotinic_acetylcholine_receptors_in_the_regulation_of_apoptosis
1302_estrogen_responsive_protein_efp_controls_cell_cycle_and_breast_tumors_growth
1303_regulation_of_transcriptional_activity_by_pml
1304_telomeres_telomerase_cellular_aging_and_immortality
1305_Signaling_mediated_by_p38-alpha_and_p38-beta
1306_inhibition_of_cellular_proliferation_by_gleevec
1307_BARD1_signaling_events
1308_downregulated_of_mta-3_in_er-negative_breast_tumors
1309_fibrinolysis_pathway
1310_insulin_signaling_pathway
1311_rb_tumor_suppressor/checkpoint_signaling_in_response_to_dna_damage
1312_IL27-mediated_signaling_events
1313_akt_signaling_pathway
1314_Angiopoietin_receptor_Tie2-mediated_signaling
1315_Signaling_events_regulated_by_Ret_tyrosine_kinase
1316_hop_pathway_in_cardiac_development
1317_Downstream_signaling_in_na_ve_CD8__T_cells
1318_role_of__-arrestins_in_the_activation_and_targeting_of_map_kinases
1319_IL6-mediated_signaling_events
1320_Removal_of_aminoterminal_propeptides_from_gamma-carboxylated_proteins
1321_Gamma-carboxylation_of_protein_precursors
1322_Transport_of_gamma-carboxylated_protein_precursors_from_the_endoplasmic_reticulum_to_the_Golgi_apparatus
1323_Synthesis_of_PIPs_at_the_ER_membrane
1324_Synthesis_of_PIPs_at_the_Golgi_membrane
1325_Synthesis_of_PIPs_at_the_plasma_membrane
1326_Synthesis_of_PIPs_at_the_early_endosome_membrane
1327_Regulation_of_PAK-2p34_activity_by_PS-GAP/RHG10
1328_Role_of_DCC_in_regulating_apoptosis
1329_Caspase-mediated_cleavage_of_cytoskeletal_proteins
1330_Apoptotic_cleavage_of_cell_adhesion__proteins
1331_Breakdown_of_the_nuclear_lamina
1332_Activation_of_DNA_fragmentation_factor
1333_Stimulation_of_the_cell_death_response_by_PAK-2p34
1334_Regulation_of_activated_PAK-2p34_by_proteasome_mediated_degradation
1335_Arf1_pathway
1336_Noncanonical_Wnt_signaling_pathway
1337_Signaling_events_mediated_by_focal_adhesion_kinase
1338_Rapid_glucocorticoid_signaling
1339_Regulation_of_Gene_Expression_by_Hypoxia-inducible_Factor
1340_Membrane_binding_and_targetting_of_GAG_proteins_1
1341_Striated_Muscle_Contraction
1342_Smooth_Muscle_Contraction
1343_Oxygen-dependent_Asparagine_Hydroxylation_of_Hypoxia-inducible_Factor_Alpha
1344_Oxygen-dependent_Proline_Hydroxylation_of_Hypoxia-inducible_Factor_Alpha
1345_agrin_in_postsynaptic_differentiation
1346_Activation_of_AMPA_receptors
1347_IL2-mediated_signaling_events
1348_reversal_of_insulin_resistance_by_leptin
1349_basic_mechanisms_of_sumoylation
1350_EPO_signaling_pathway
1351_Posttranslational_regulation_of_adherens_junction_stability_and_dissassembly
1352_Validated_transcriptional_targets_of_deltaNp63_isoforms
1353_Early_Phase_of_HIV_Life_Cycle
1354_Binding_and_entry_of_HIV_virion
1355_Uncoating_of_the_HIV_Virion
1356_minus-strand_DNA_synthesis
1357_Plus-strand_DNA_synthesis
1358_Integration_of_provirus
1359_Integration_of_viral_DNA_into_host_genomic_DNA
1360_2-LTR_circle_formation
1361_SHC1_events_in_ERBB4_signaling
1362_PI3K_events_in_ERBB4_signaling
1363_Downregulation_of_ERBB2_ERBB3_signaling
1364_Signaling_by_ERBB4
1365_Rho_GTPase_cycle
1366_Nuclear_signaling_by_ERBB4
1367_Downregulation_of_ERBB4_signaling
1368_Signaling_by_BMP
1369_Synthesis_and_organization_of_GAG__GAGPOL_polyproteins
1370_Formation_of_HIV-1_elongation_complex_in_the_absence_of_HIV-1_Tat
1371_Pausing_and_recovery_of_HIV-1_elongation
1372_Abortive_elongation_of_HIV-1_transcript_in_the_absence_of_Tat
1373_HIV-1_elongation_arrest_and_recovery
1374_Rev-mediated_nuclear_export_of_HIV-1_RNA
1375_Tat-mediated_HIV-1_elongation_arrest_and_recovery
1376_Pausing_and_recovery_of_Tat-mediated_HIV-1_elongation
1377_Endothelins
1378_control_of_gene_expression_by_vitamin_d_receptor
1379_akap95_role_in_mitosis_and_chromosome_dynamics
1380_Alternative_complement_activation
1381_Terminal_pathway_of_complement
1382_Lectin_pathway_of_complement_activation
1383_Classical_antibody-mediated_complement_activation
1384_Initial_triggering_of_complement
1385_Toll_Like_Receptor_TLR6_TLR2_Cascade
1386_Activation_of_C3_and_C5
1387_Regulation_of_Complement_cascade
