# Supplementary material for: Genetic Ablation and Multi-Omics Profiling Reveal CEP55 as a Key Driver of Tumorigenesis in Diverse Cancer Models
Source: Research Square preprint supplement (doi:10.21203/rs.3.rs-8060108/v1), 2025-11-28
Supplement: Supplementary file 7 [file Sup Material_2 (1387_hallmarks_summary).pdf › Sup Material_2 (1387_hallmarks_summary).pdf]

|                                                                                               | ACC  | BLCA | BRCA | CESC | CHOL | COAD | COREAD | DLBC | ESCA | GBM  | HNSC | KICH | KIRC | KIRP | LGG  | LHCG | LIAD | LUSC | MESO | NSCLC | OV   | PAD  |
|-----------------------------------------------------------------------------------------------|------|------|------|------|------|------|--------|------|------|------|------|------|------|------|------|------|------|------|------|-------|------|------|
| 546_p53_signaling_pathway                                                                     | **** | **** | **** | ***  | ***  | *    | ***    | **** | **** | **** | **** | *    | ***  | ***  | **** | **** | **** | **** | **** | ****  | *    | **** |
| 148_e2f1_destruction_pathway                                                                  | **** | **** | **** | **** | **** | **** | ****   | **** | **** | **** | **** | *    | **** | **** | **** | **** | **** | **** | **** | ****  | **** | **** |
| 97_E2F_transcription_factor_network                                                           | **** | **** | **** | **** | **** | **** | ****   | **** | **** | **** | **** |      | **** | **** | **** | **** | **** | **** | **** | ****  | **** | **** |
| 76_FOXM1_transcription_factor_network                                                         | **** | **** | **** | **** | **** | **** | ****   | **** | **** | **** | **** | **   | **** | **** | **** | **** | **** | **** | **** | ****  | **** | **** |
| 614_p53-Dependent_G1_DNA_Damage_Response                                                      | **** | **** | **** | **   | *    | **** | ****   | **** | **** | **** | **** |      | *    | *    | **** | **** | **** | **** | **** | ****  | **** | **** |
| 337_C-MYC_pathway                                                                             | *    | **** | **** | **** |      | **** | ****   | *    | **** | *    | **** | *    | *    |      |      | **** | **** | **** | **** | ****  | **** | **** |
| 824_Validated_targets_of_C-MYC_transcriptional_activation                                     | **** | **** | **** | **   | ***  | **** | ****   | **** | **** | **** | **** | **   |      | **** | **** | **** | **** | **** | **** | ****  | **** | **** |
| 156_caspase_cascade_in_apoptosis                                                              | **** | **** | **** | *    |      | **** | ****   | **** | *    | **** | **** |      | **** | **** | **** | **** | **** | **** | **** | ****  | **** | **** |
| 469_p38MAPK_events                                                                            | *    | **** | **** | ***  |      | **** | ****   | *    | *    |      |      |      |      |      |      | **** | **** | **** | **   | ****  |      | **** |
| 235_il6_signaling_pathway                                                                     | **   | **** | **** |      |      | **** | ****   | ***  |      |      |      | ***  | **** |      |      | **** | **** |      |      | ****  |      | **** |
| 247_mechanism_of_protein_import_into_the_nucleus                                              | **** | **** | **** | **** |      | **** | ****   | **** | **** | **** | **** |      | **   | **** | **** | **** | **** | **** | **** | ****  | **** | **** |
| 243_sumoylation_by_ranbp2_regulates_transcriptional_repression                                |      | **** | **** |      |      | **** | ****   | *    | *    | *    | **** |      | *    |      |      | **** | **** | **** | **** |       | **** | *    |
| 377_the_prc2_complex_sets_long-term_gene_silencing_through_modification_of_histone_tails      | **** |      | **** | *    |      | **** | ****   |      | ***  | **** | **** |      | **** |      |      | **** | **** | **** | **** |       | **** | **   |
| 376_Regulation_of_retinoblastoma_protein                                                      | **** | **** | **** | ***  | **** | **** | ****   | **** | **** | **** | **** |      | **** | **** | **** | **** | **** | **** | **** | ****  | **** | **** |
| 494_il2_signaling_events_mediated_by_PI3K                                                     |      | **** | **** |      |      | **   | **     | ***  |      |      |      |      | **** |      |      | **** | **** | **** | **** | ****  | **** | **   |
| 309_cell_cycle_g1/s_check_point                                                               | **** | **** | **** | **** | **** | **** | ****   | **** | **** | **** | **** |      | **** | **   | **** | **** | **** | **** | **** | ****  | **** | **** |
| 286_brca1_dependent_ub_ligase_activity                                                        | **** | **** | **** |      | **   | **** | ****   |      | **   | **** | **** |      | *    |      |      | **** | **** | **** | **** | **    | **** | ***  |
| 718_role_of_brca1_brca2_and_atr_in_cancer_susceptibility                                      | **** | **** | **** | *    | ***  | **** | ****   | ***  | **** | **** | **** | *    | **** | **** | **** | **** | **** | **** | **   | ****  | **** | **** |
| 641_PLK3_signaling_events                                                                     | **** | **** | **** |      | *    | **** | ****   |      | *    | *    | **** |      | ***  |      | **** | **** | **** | **** |      | ****  |      | **** |
| 592_sonic_hedgehog_receptor_ptc1_regulates_cell_cycle                                         | *    | **** | **** |      |      | **** | ****   | **   | **** | **** | **** | *    |      |      |      | **** | **** | **** | *    | ****  |      | *    |
| 567_MHC_class_II_antigen_presentation                                                         |      | **** | **** |      |      | **** | ****   |      | ***  | **   | *    |      |      | ***  | **** | **** | **** | **** | **** | **    | ***  | **   |
| 566_Cross-presentation_of_soluble_exogenous_antigens_endosomes                                |      | **** | **** |      |      | **** | ****   |      | **** | *    |      | **** | *    | ***  | *    | *    | **** | **** | **** | ****  | **   | **** |
| 532_tnf/stress_related_signaling                                                              |      | **** | **** | **** |      | **** | ****   |      | ***  | **   | **   |      | ***  |      |      | *    | **** | **** | **** | ****  | *    | **** |
| 952_G2/M_DNA_replication_checkpoint                                                           | **** | **** | **** | **   | **   | **** | ****   | *    | **** | **** | **** |      | **   |      | **   | **** | **** | **** | **** | ****  | **** | **** |
| 918_Separation_of_Sister_Chromatids                                                           | **** | **** | **** | **** | **   | **** | ****   | ***  | **** | **** | **** | *    | *    | **   | **** | **** | **** | **** | **** | ****  | **** | **** |
| 917_Initiation_of_Nuclear_Envelope_Reformation                                                | **** | **** | **** |      |      | **** | ****   |      | **** | **** | **** | *    |      | *    | **** | **** | **** | **** | **** | ****  | **** | **** |
| 916_Condensation_of_Prometaphase_Chromosomes                                                  | **** | **** | **** | **** | ***  | **** | ****   | **   | **** | **** | **** | *    | *    | ***  | **** | **** | **** | **** | **** | ****  | **** | **** |
| 915_Mitotic_Metaphase/Anaphase_Transition                                                     | **** | **** | **** | **** | **   | **** | ****   |      | **** | **** | **** |      |      | *    | **** | **** | **** | **** | **** | ****  | **** | **** |
| 914_Mitotic_Telophase/Cytokinesis                                                             | **** | **** | **** | **** | ***  | **** | ****   | **** | **** | **** | **** |      |      |      |      | **** | **** | **** | **** | ****  | **** | **** |
| 913_Cohesin_Loading_onto_Chromatin                                                            | **** | **** | **** | **** |      | **** | ****   | *    | **** | **** | **** |      |      | *    | **** | **   | **** | **** | **** | ****  | **** | **** |
| 960_Deposition_of_New_CENPA-containing_Nucleosomes_at_the_Centromere                          | **** | **** | **** | **   |      | **** | ****   | *    | **** | **** | **** | *    |      | **   | **** | **** | **** | **** | **** | ****  | **** | **** |
| 959_Telomere_C-strand_Lagging-Strand_Synthesis                                                | **** | **** | **** |      | *    | **** | ****   |      | **** | **** | **** | *    | **** | **** | **** | **** | **** | **** | **** | ****  | **** | **** |
| 958_Telomere_Extension_By_Telomerase                                                          | ***  | **** | **** | **   | *    | ***  | ****   |      | **** | ***  | **** | **   |      |      | **** | **** | **** | **** | **** | ****  | **** | **** |
| 957_Polymerase_switching_on_the_C-strand_of_the_telomere                                      | **** | **** | **** | **   | *    | **** | ****   | **   | **** | **** | **** | **   | **** | **** | **** | **** | **** | **** | **** | ****  | **** | **** |
| 956_Telomere_C-strand_synthesis_initiation                                                    | **** | **** | **** | **** |      | **** | ****   | **** | **** | **** | **** |      |      |      | **** | **** | **** | **** | **** | ****  | **** | **** |
| 955_Removal_of_the_Flap_Intermediate_from_the_C-strand                                        | **** | **** | **** | **** |      | **** | ****   |      | **** | **** | **** | **   | **** |      | **** | **** | **** | **** | **** | ****  | **** | **** |
| 954_Processive_synthesis_on_the_C-strand_of_the_telomere                                      | **** | **** | **** | **   |      | **** | ****   | *    | **** | **** | **** | *    | **** | **** | **** | **** | **** | **** | **** | ****  | **** | **** |
| 1311_b_tumor_suppressor/checkpoint_signaling_in_response_to_dna_damage                        | **** | **** | **** | **** | ***  | **** | ****   | **** | **** | **** | **** |      | **** | **   | **** | **** | **** | **** | **** | ****  | **** | **** |
| 1310_insulin_signaling_pathway                                                                |      | **** | **** | **** |      | **** | ****   |      | **** | **** | **** |      | **** | *    |      | **** | **** | **** | **** | ****  | **** | **** |
| 1291_DNA_replication_initiation                                                               | **** | **** | **** | **** |      | **** | ****   | **** | **** | **** | **** |      |      |      | **** | **** | **** | **** | **** | ****  | **** | **** |
| 1290_Switching_of_origins_to_a_post-replicative_state                                         | **** | **** | **** | **   | ***  | **** | ****   |      | **** | **** | **** | *    | **** | **** | **** | **** | **** | **** | **** | ****  | **** | **** |
| 1289_Orc1_removal_from_chromatin                                                              | **** | **** | **** | *    | **   | **** | ****   |      | **** | **** | **** | *    | **** | ***  | **** | **** | **** | **** | **** | ****  | **** | **** |
| 1288_CDK-mediated_phosphorylation_and_removal_of_Cdc6                                         | *    | **** | **** |      |      | **** | ****   |      | **** | **   | ***  |      | **** | *    | **   | *    | **** | **** | **** | ****  | **** | **** |
| 1287_Unwinding_of_DNA                                                                         | **** | **** | **** | ***  | **** | **** | ****   | **** | **** | **** | **** | **   | **** | **** | **** | **** | **** | **** | **** | ****  | **** | **** |
| 1286_Leading_Strand_Synthesis                                                                 | **** | **** | **** | **   |      | **** | ****   | **   | **** | **** | **** | *    | **** | **** | **** | **** | **** | **** | **** | ****  | **** | **** |
| 1257_cdc25_and_chk1_regulatory_pathway_in_response_to_dna_damage                              | **** | **** | **** | *    |      | **** | ****   | **   | **** | **   | **** |      | **** |      | **** | **** | **** | **** | *    | ****  | **** | **   |
| 52_Activation_of_caspases_through_apoptosome-mediated_cleavage                                | **** |      | **** | *    |      | **** | ****   | ***  |      | *    | **** |      | **** |      | **** | **** | **** | **** | **** | ****  | **** | **   |
| 51_Apoptotic_execution_phase                                                                  |      |      |      |      |      | **** | ****   | **** |      |      | **** |      | **** |      | **** | **   | *    | *    | *    | **    |      | **** |
| 50_Apoptotic_cleavage_of_cellular_proteins                                                    |      |      | **** |      |      | **** | ****   | **** |      | **** | **** |      | **** | **** | **** | **** | **** | **** | **** | *     | **** | **** |
| 48_proteasome_complex                                                                         |      | **   | **** |      |      | **** | ****   | *    | **** | *    |      |      | **   |      |      | **** | **** | **** | **** | ****  |      | **** |
| 7_Removal_of_licensing_factors_from_origins                                                   | **** | **** | **** | **** | **** | **** | ****   |      | **** | **** | **** | *    |      |      | ***  | **** | **** | **** | **** | ****  | **** | **** |
| 6_Association_of_licensing_factors_with_the_pre-replicative_complex                           | **** | **** | **** |      | **   | **** | ****   | *    | **** | **** | **** |      |      |      | *    | **** | **** | **** | **** | ****  | **** | **** |
| 5_Establishment_of_Sister_Chromatid_Cohesion                                                  | ***  | **** | **** | **** |      | **** | ****   | **** | **** | **** | **** |      | **   |      |      | **** | **** | **** | **** | ****  | **** | **** |
| 4_Ubiquitin-dependent_degradation_of_Cyclin_D1                                                |      | **** | **** |      |      | **** | ****   | *    | **** | *    | ***  | *    | **** | *    | **** | **** | **** | **** | **** | ****  | *    | **** |
| 3_Removal_of_the_Flap_Intermediate                                                            | **** | **** | **** | **** |      | **** | ****   | *    | **** | **** | **** | *    | **** | *    | **** | **** | **** | **** | **** | ****  | **** | **** |
| 2_Processive_synthesis_on_the_lagging_strand                                                  | **** | **** | **** | **   |      | **** | ****   | *    | **** | **** | **** | *    | **** |      | **** | **** | **** | **** | **** | ****  | **** | **** |
| 1_G2_Phase                                                                                    | **** | **** | **** |      | **** | **** | ****   | **** | **** | **** | **** | *    | **** | **** | **** | **** | **** | **** | **** | ****  | **** | **** |
| 222_Phosphorylation_of_proteins_involved_in_G1/S_transition_by_active_Cyclin_E_Cdk2_complexes | **** | **** | **** | **** | **   | **** | ****   | **** | **** | **** | **** |      | *    | **** | **** | **** | **** | **** | **** | ****  | **** | **** |
| 221_SCF(Skp2)-mediated_degradation_of_p27/p21                                                 | **** | **** | **** |      |      | **** | ****   |      | **** | **** | **** | *    | **** | **   | **** | **   | **** | **** | **** | ****  | **** | **** |
| 220_G1/S-Specific_Transcription                                                               | **** | **** | **** | **** | **** | **** | ****   | ***  | **** | **** | **** | **   | **** | **** | **** | **** | **** | **** | **** | ****  | **** | **** |
| 219_E2F-mediated_regulation_of_DNA_replication                                                | **** | **** | **** | **** | **** | **** | ****   | **** | **** | **** | **** | **   | **** | **** | **** | **** | **** | **** | **** | ****  | **** | **** |
| 218_Activation_of_the_pre-replicative_complex                                                 | **** | **** | **** | **** | ***  | **** | ****   | **** | **** | **** | **** | *    | **** | **** | **** | **** | **** | **** | **** | ****  | **** | **** |
| 217_E2F-enabled_inhibition_of_pre-replication_complex_formation                               | **** | **** | **** | **** | **   | **** | ****   | **   | **** | **** | **** |      | *    |      | **   | **** | **** | **** | **** | ****  | **** | **** |
| 216_Inhibition_of_replication_initiation_of_damaged_DNA_by_RB1/E2F1                           | **** | **** | **** | **** | **   | **** | ****   | **** | **** | **** | **** |      | **** | *    | **** | **** | **** | **** | **** | ****  | **** | **   |
| 215_Cyclin_A_Cdk2-associated_events_at_S_phase_entry                                          | **** | **** | **** | **** | **   | **** | ****   | **** | **** | **** | **** |      | **** | **** | **** | **** | **** | **** | **** | ****  | **** | **** |
| 251_fas_signaling_pathway_cd95                                                                | **   | **** | **** | ***  |      | **** | ****   | **** |      | **** | **** |      | **** | **** | **** | **** | **** | **** | **** | ****  | **** | **** |
| 435_ATR_signaling_pathway                                                                     | **** | **** | **** | **** | **** | **** | ****   | **** | **** | **** | **** | *    |      | *    | **** | **** | **** | **** | **** | ****  | **** | **** |
| 409_atm_signaling_pathway                                                                     | **   | **** | **** |      | ***  | **** | ****   | **   |      | **   | **** |      | **** |      | **** | **** | **** | **** | **** | ****  | **** | **** |
| 403_Ubiquitin_Mediated_Degradation_of_Phosphorylated_Cdc25A                                   | *    |      | **** |      |      |      |        |      | *    |      | **   |      |      |      | **** | ***  | **** | **** | **** | ****  | **** | **** |
| 402_p53-Independent_DNA_Damage_Response                                                       | **** | **** | **** |      | *    | **   | **     | **** | **** | **** | **** |      | **** |      | **** | **** | **** | **** | **** | ****  | **** | **** |
| 401_Activation_of_ATR_in_response_to_replication_stress                                       | **** | **** | **** | **** | **** | **** | ****   | **   | **** | **** | **** | **   | **** | **   | **** | **** | **** | **** | **** | ****  | **** | **** |
| 400_Chk1/Chk2(Cds1)_mediated_inactivation_of_Cyclin_B_Cdk1_complex                            | **** | **** | **** | **   | ***  | **** | ****   | **** | **** | **** | **** | *    |      |      | **** | **** | **** | **** | **** | ****  | **** | **** |
| 222_Phosphorylation_of_proteins_involved_in_G1/S_transition_by_active_Cyclin_E_Cdk2_complexes | **** | **** | **** | **** | **   | **** | ****   | **** | **** | **** | **** |      | *    | **** | **** | **** | **** | **** | **** | ****  | **** | **** |
| 221_SCF(Skp2)-mediated_degradation_of_p27/p21                                                 | **** | **** | **** |      |      | **** | ****   |      | **** | **** | **** | *    | **** | **   | **** | **   | **** | **** | **** | ****  | **** | **** |
| 220_G1/S-Specific_Transcription                                                               | **** | **** | **** | **** | **** | **** | ****   | ***  | **** | **** | **** | **   | **** | **** | **** | **** | **** | **** | **** | ****  | **** | **** |
| 219_E2F-mediated_regulation_of_DNA_replication                                                | **** | **** | **** | **** | **** | **** | ****   | **** | **** | **** | **** | **   | **** | **** | **** | **** | **** | **** | **** | ****  | **** | **** |
| 218_Activation_of_the_pre-replicative_complex                                                 | **** | **** | **** | **** | ***  | **** | ****   | **** | **** | **** | **** | *    | ***  | ***  | **** | **** | **** | **** | **** | ****  | **** | **** |
| 217_E2F-enabled_inhibition_of_pre-replication_complex_formation                               | **** | **** | **** | **** | **   | **** | ****   | **   | **** | **** | **** |      | *    |      | **   | **** | **** | **** | **** | ****  | **** | **** |
| 216_Inhibition_of_replication_initiation_of_damaged_DNA_by_RB1/E2F1                           | **** | **** | **** | **** | **   | **** | ****   | **** | **** | **** | **** |      | **** | *    | **** | **** | **** | **** | **** | ****  | **** | **   |
| 215_Cyclin_A_Cdk2-associated_events_at_S_phase_entry                                          | **** | **** | **** | **** | **   | **** | ****   | **** | **** | **** | **** |      | **** | **** | **** | **** | **** | **** | **** | ****  | **** | **** |
| 1202_Resolution_of_Sister_Chromatid_Cohesion                                                  | **** | **** | **** | **** | **   | **** | ****   | **** | **** | **** | **** |      |      | **** | **** | **** | **** | **** | **** | ****  | **** | **** |
| 1201_Mitotic_Prometaphase                                                                     | **** | **** | **** | **** | **** | **** | ****   | **** | **** | **** | **** | *    |      | **   | **** | **** | **** | **** | **** | ****  | **** | **** |
| 1200_MASTL_Facilitates_Mitotic_Progression                                                    | **** | **** | **** | **** |      | **** | ****   | **** | **** | **** | **** |      | **** | *    | **** | **** | **** | **** | **** | ****  | **** | **** |
| 1199_Clearance_of_Nuclear_Envelope_Membranes_from_Chromatin                                   | **** | **** | **** |      | **** | **** |        |      |      |      |      |      |      |      |      |      |      |      |      |       |      |      |
