# Supplementary material for: Genetic Ablation and Multi-Omics Profiling Reveal CEP55 as a Key Driver of Tumorigenesis in Diverse Cancer Models
Source: Research Square preprint supplement (doi:10.21203/rs.3.rs-8060108/v1), 2025-11-28
Supplement: Supplementary file 8 [file f1b7a66aaaa3ee9c76cc0af5.pdf]

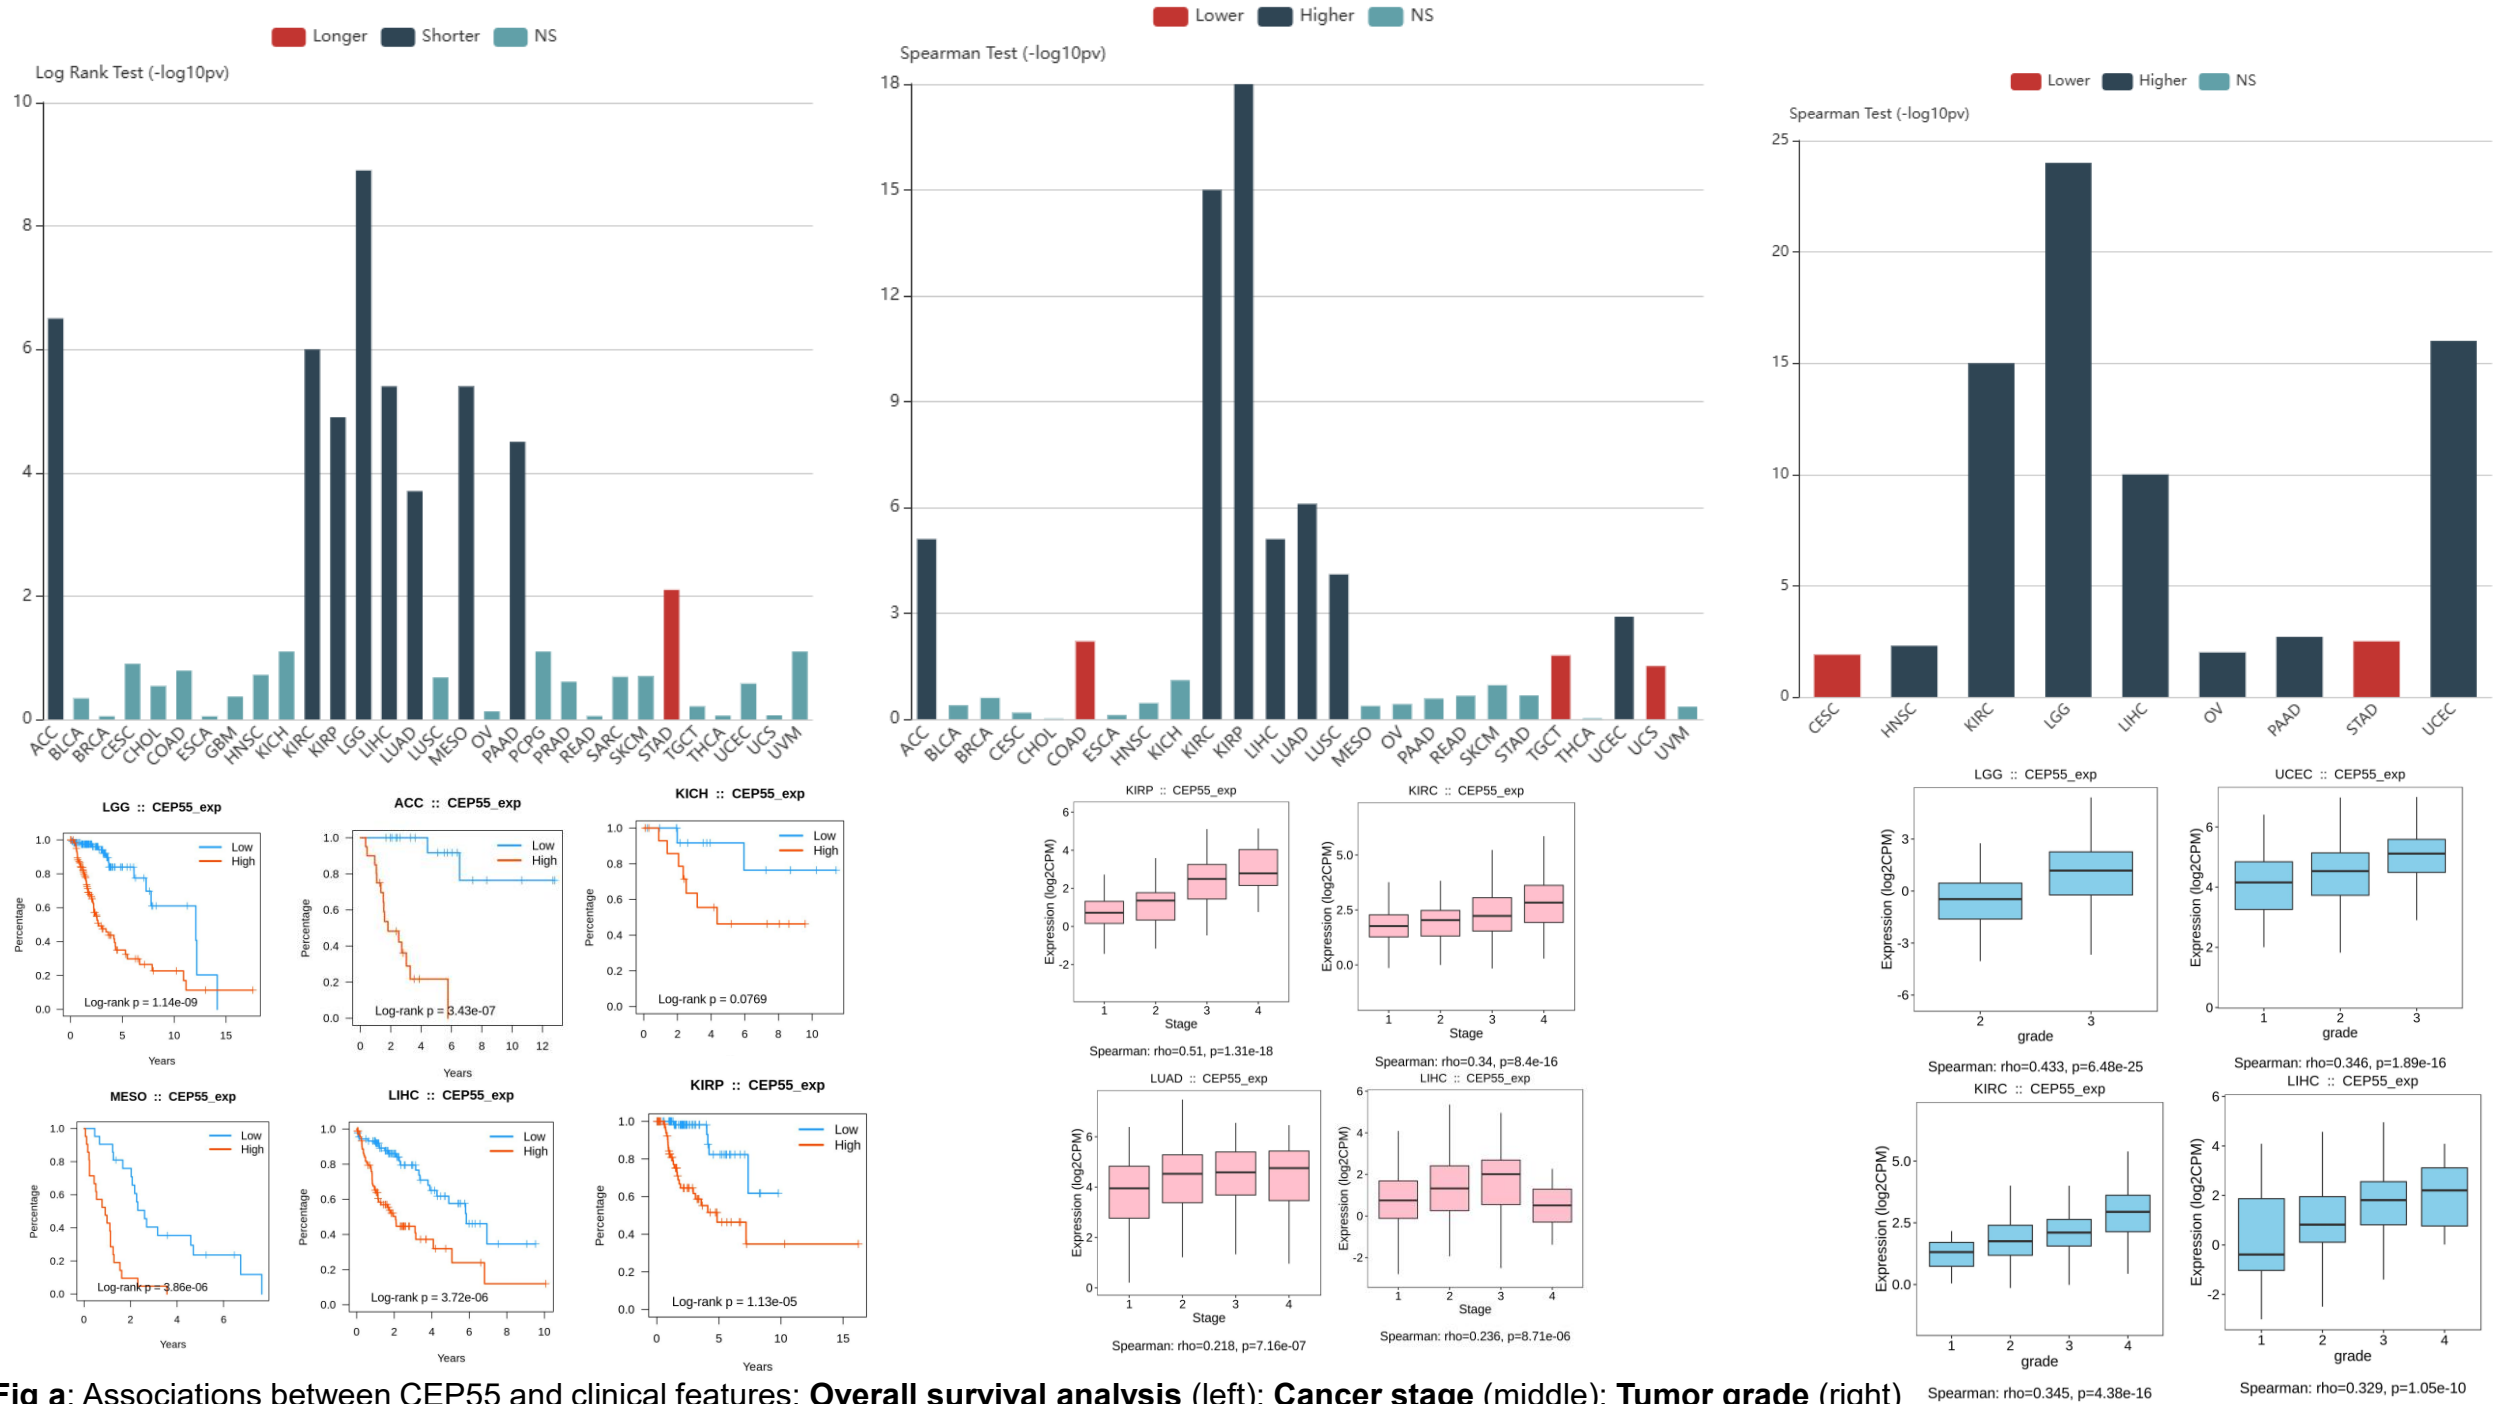

**Fig a: Associations between CEP55 and clinical features: Overall survival analysis (left); Cancer stage (middle); Tumor grade (right)**

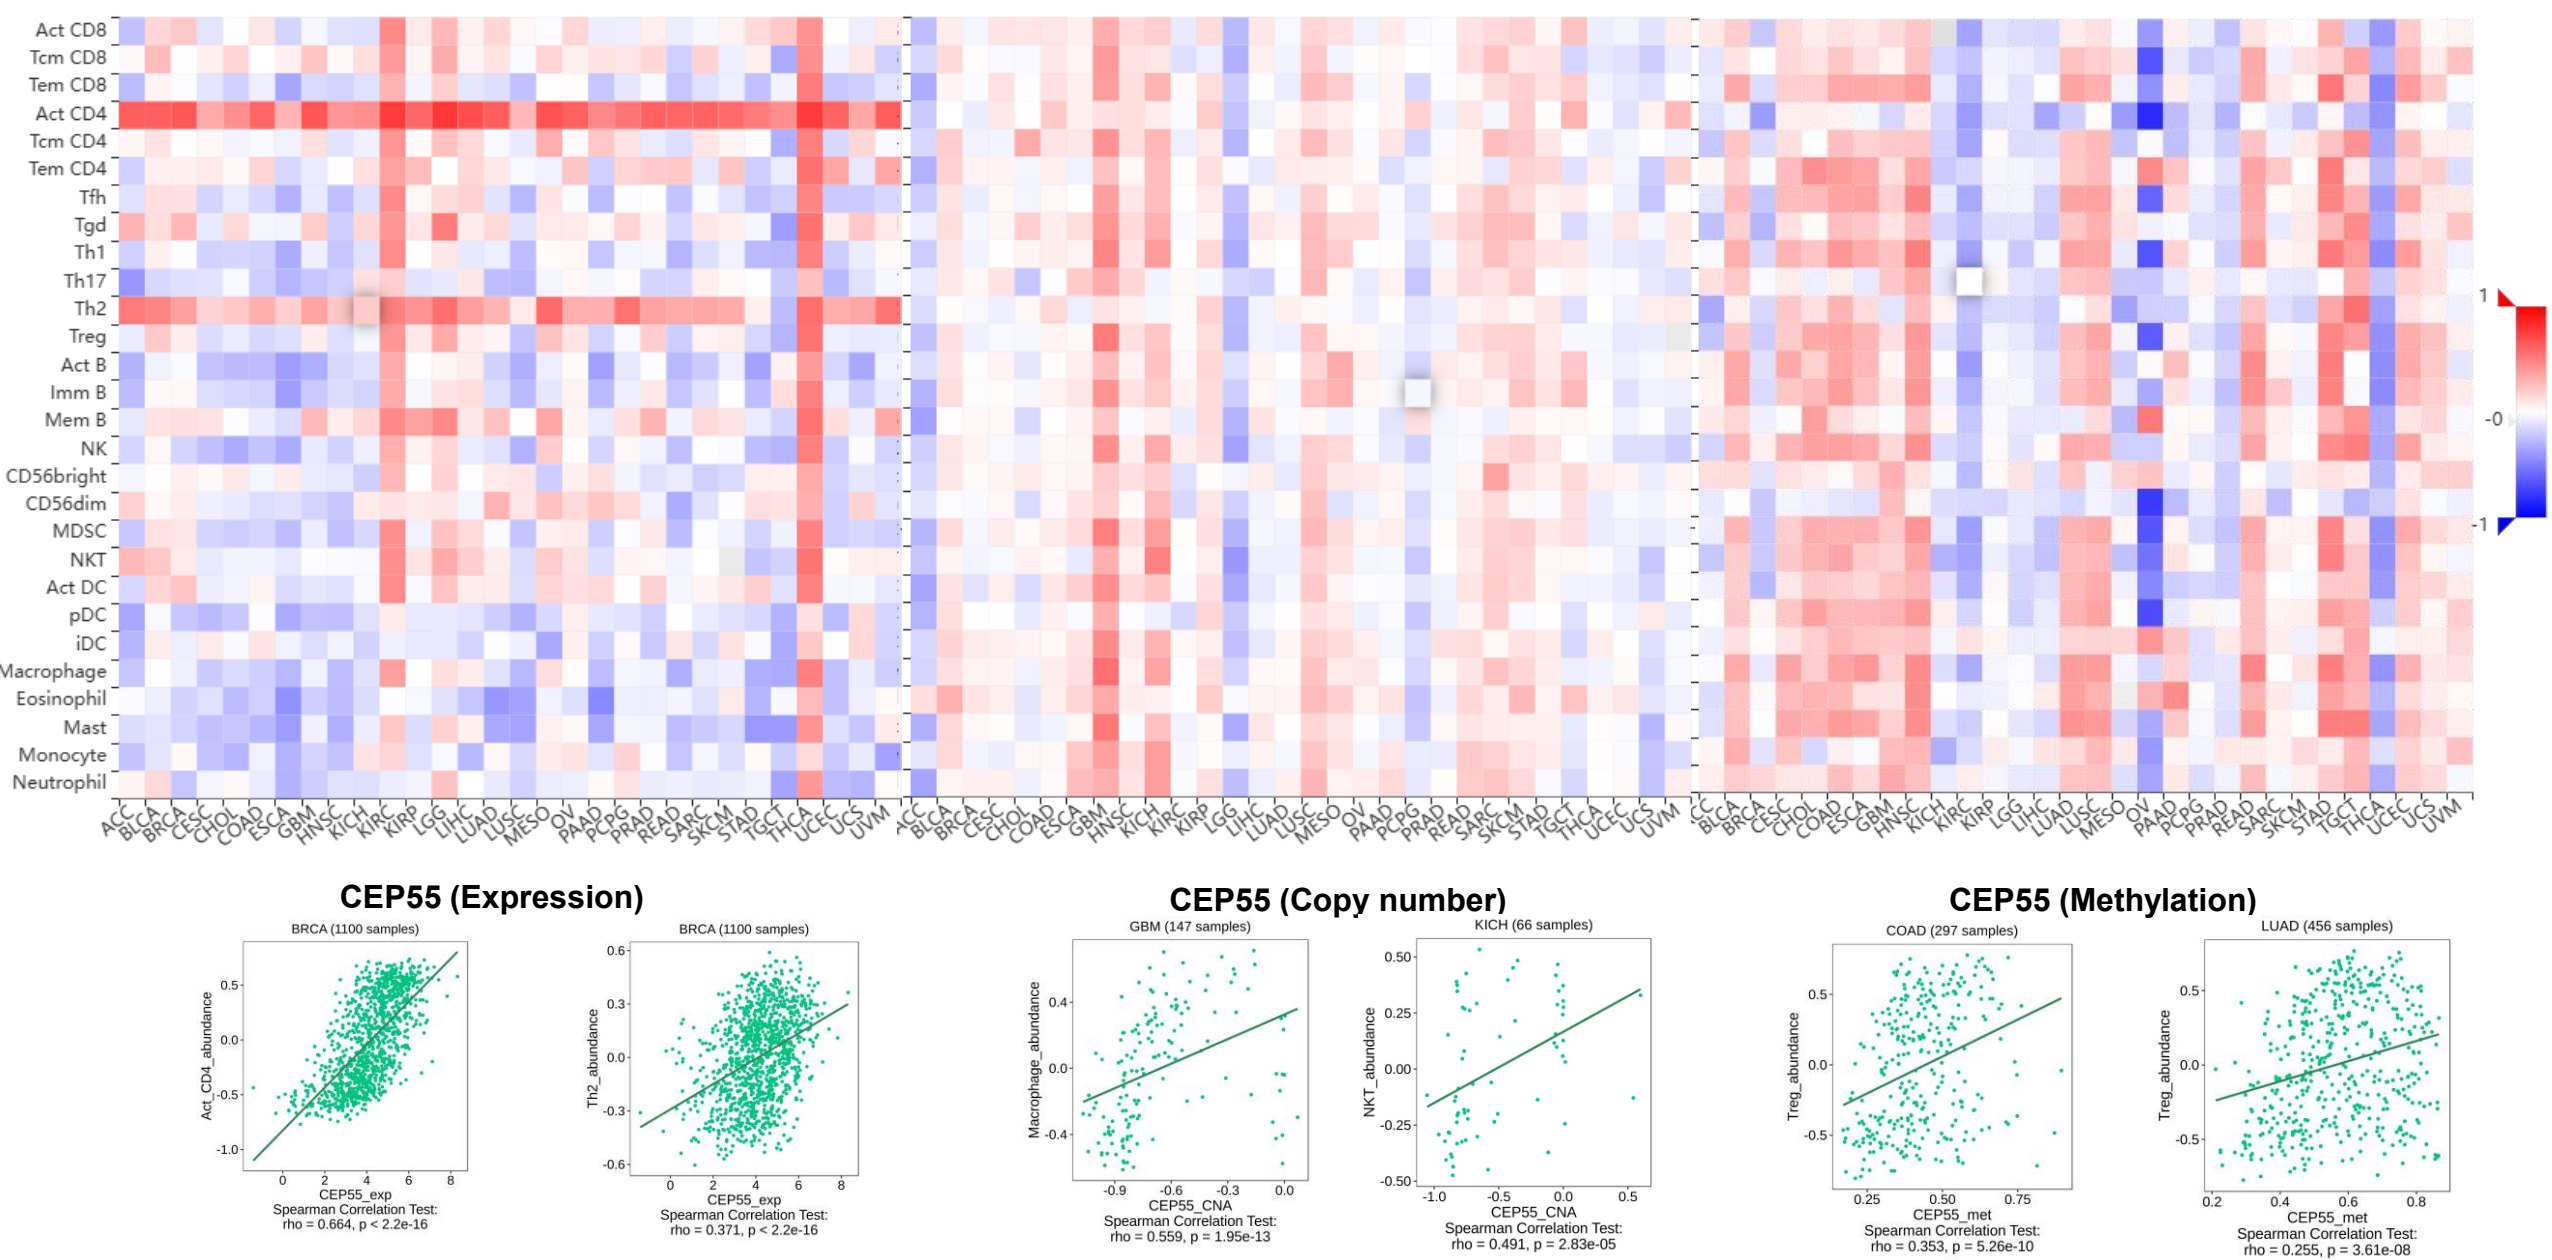

**Fig b:** Relations between abundance of tumor-infiltrating lymphocytes (TILs) and expression, copy number, methylation, of CEP55. The immune-related signatures of 28 TIL types from Charoentong's study, which can be viewed in the download page. For each cancer type, the relative abundance of TILs were inferred by using gene set variation analysis (GSVA) based on gene expression profile. In this tab, users can examine which kinds of TILs might be regulated by the current gene. (Source: **TISIDB**: an integrated repository portal for tumor-immune system interactions).

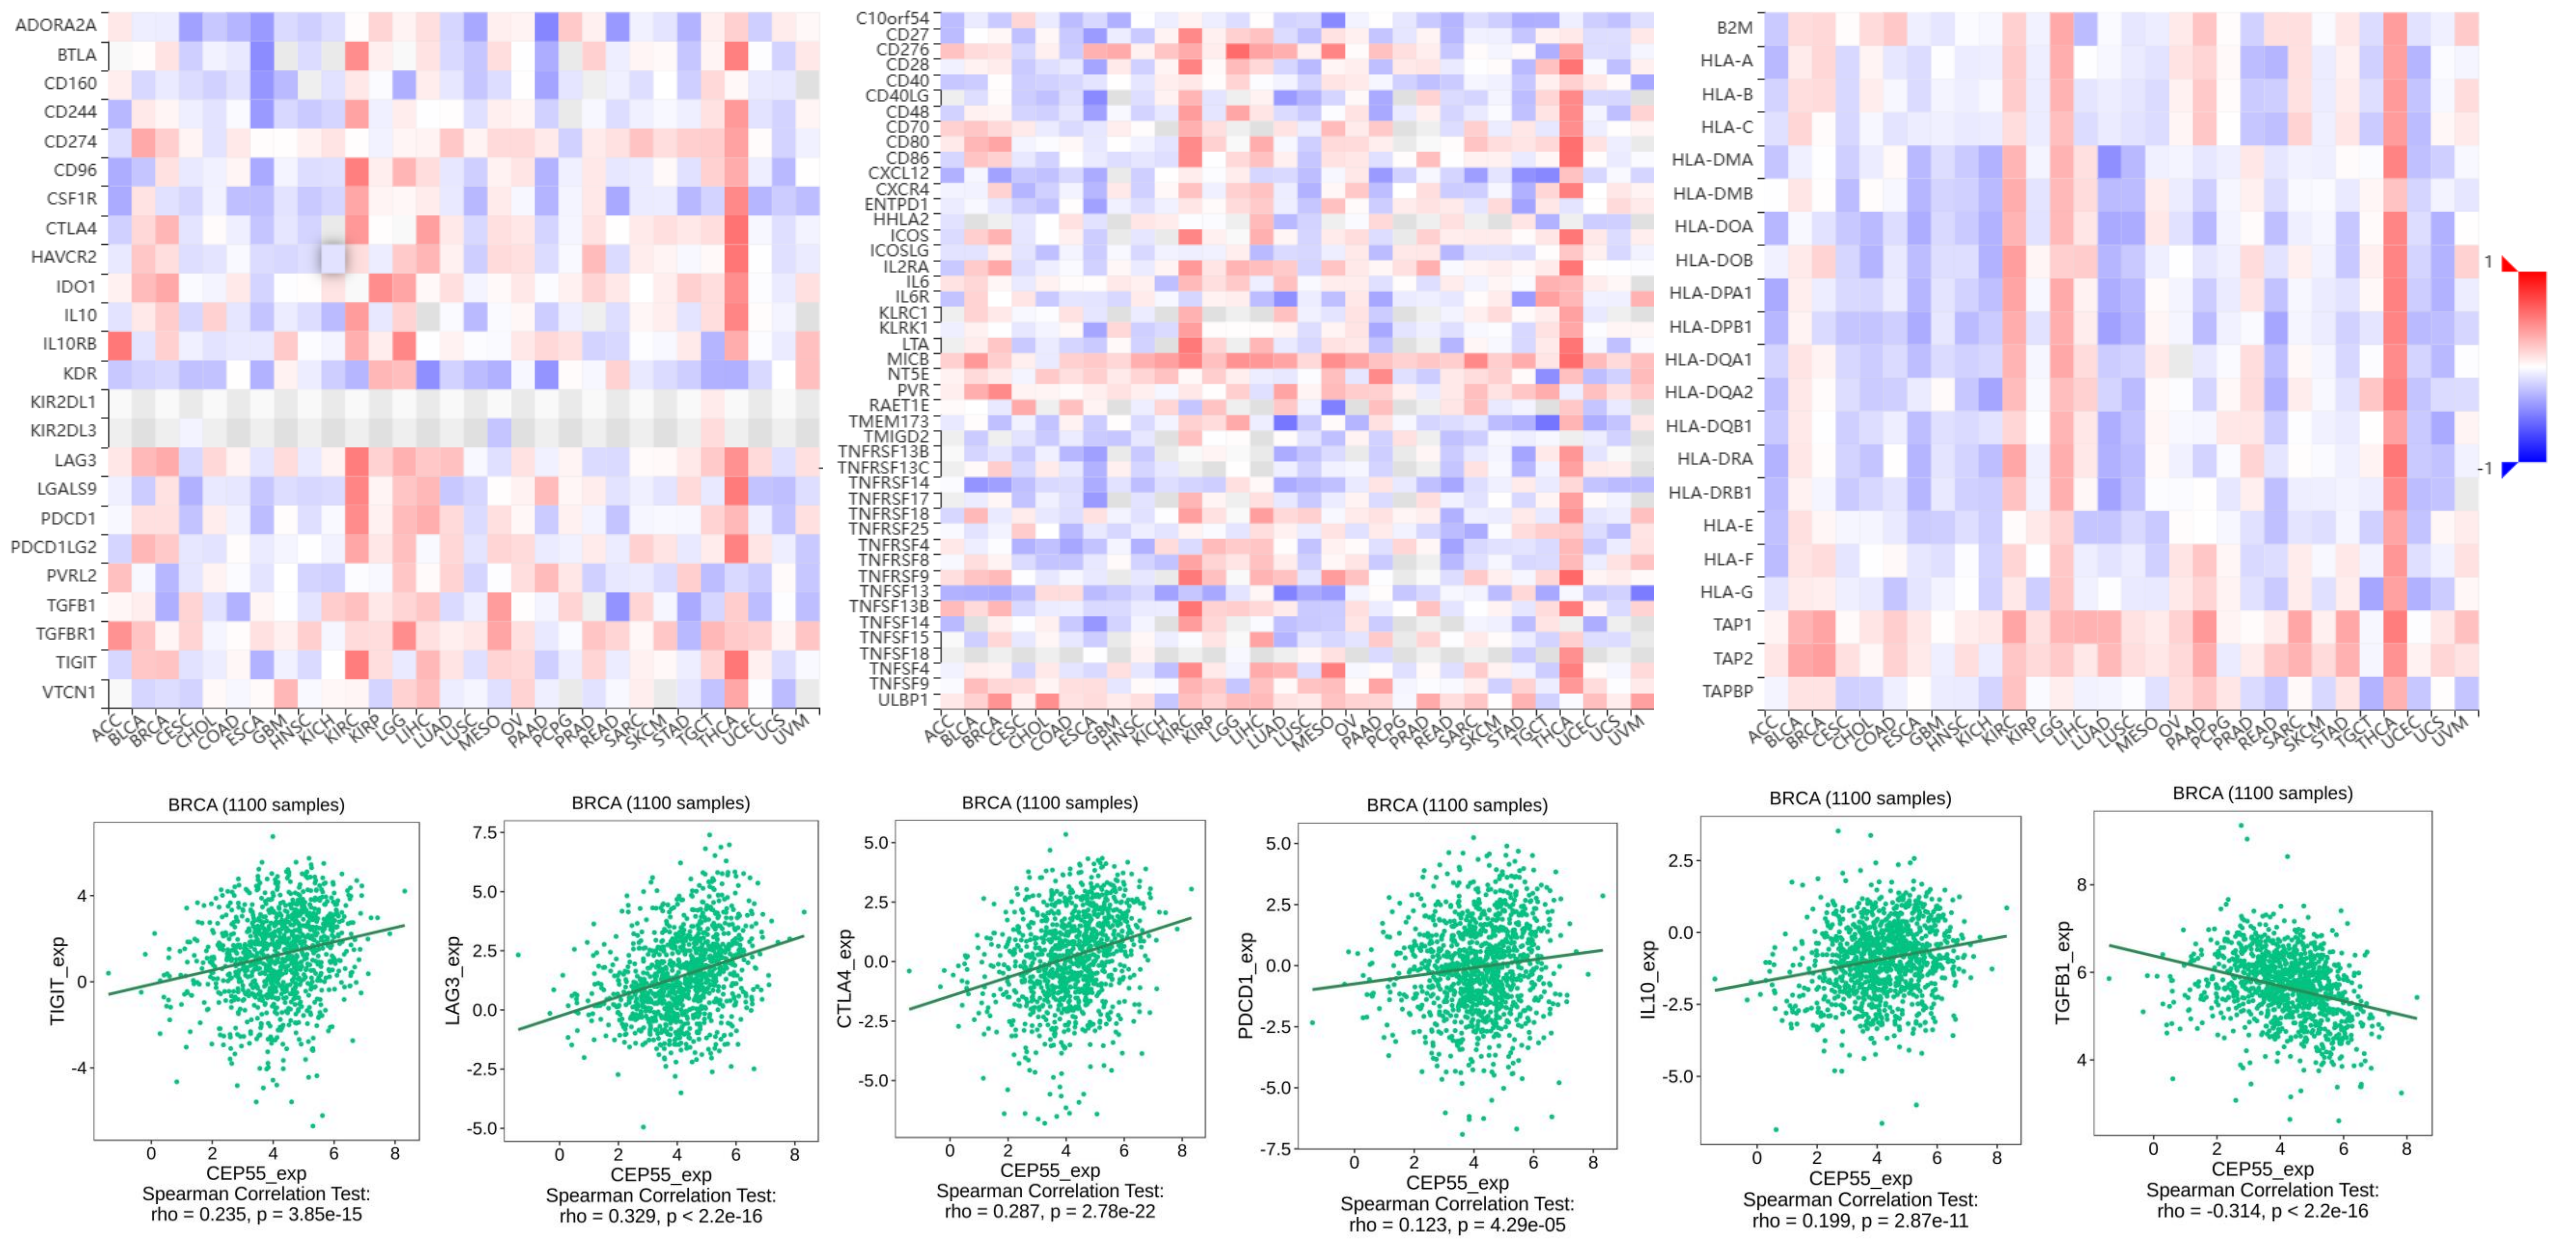

**Fig c:** Relations between three kinds of immunomodulators and expression of CEP55. These immunomodulators were collected from Charoentong's study. In this tab, users can examine which immunomodulators might be regulated by CEP55.: **Immunoinhibitor** (left); **Immunostimulator** (middle); **MHC molecule** (right). Positive correlation of TIGIT, LAG3, CTLA4, PD1, and IL-10 and negative correlation of TGFβ1 with CEP55 expression.



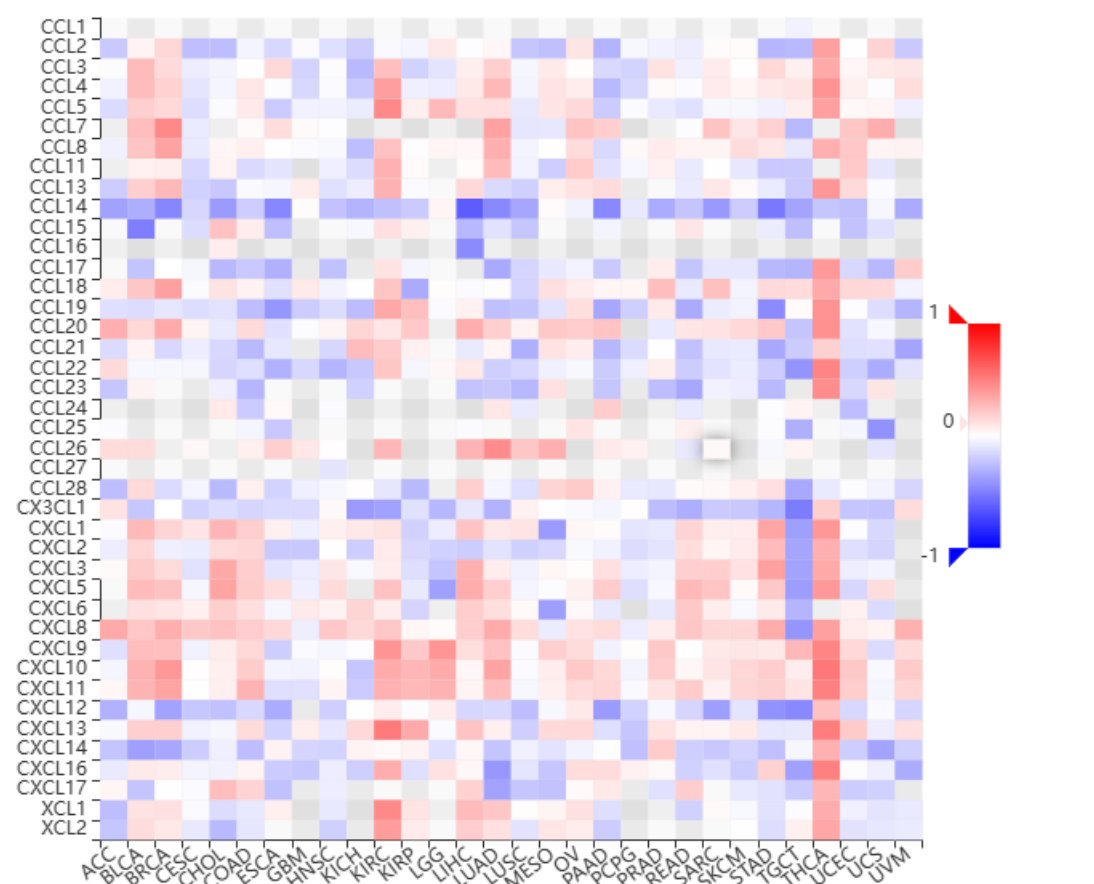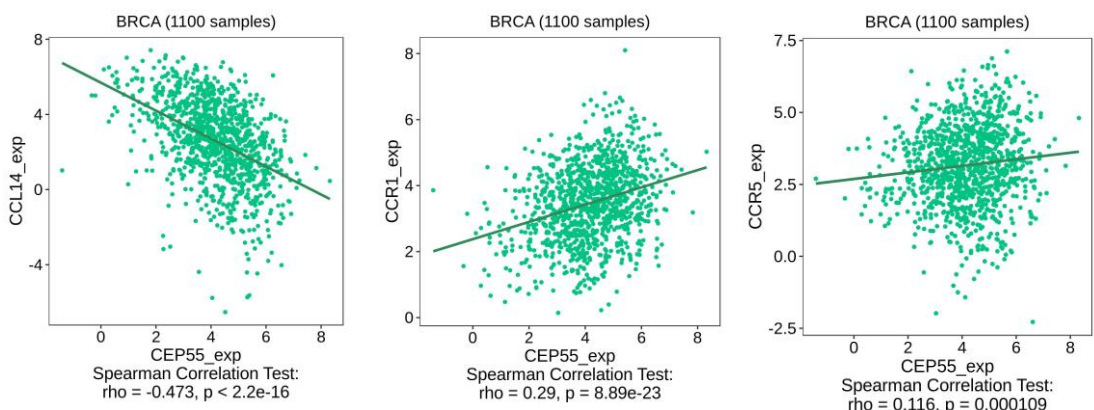

CCR3 is not expressed

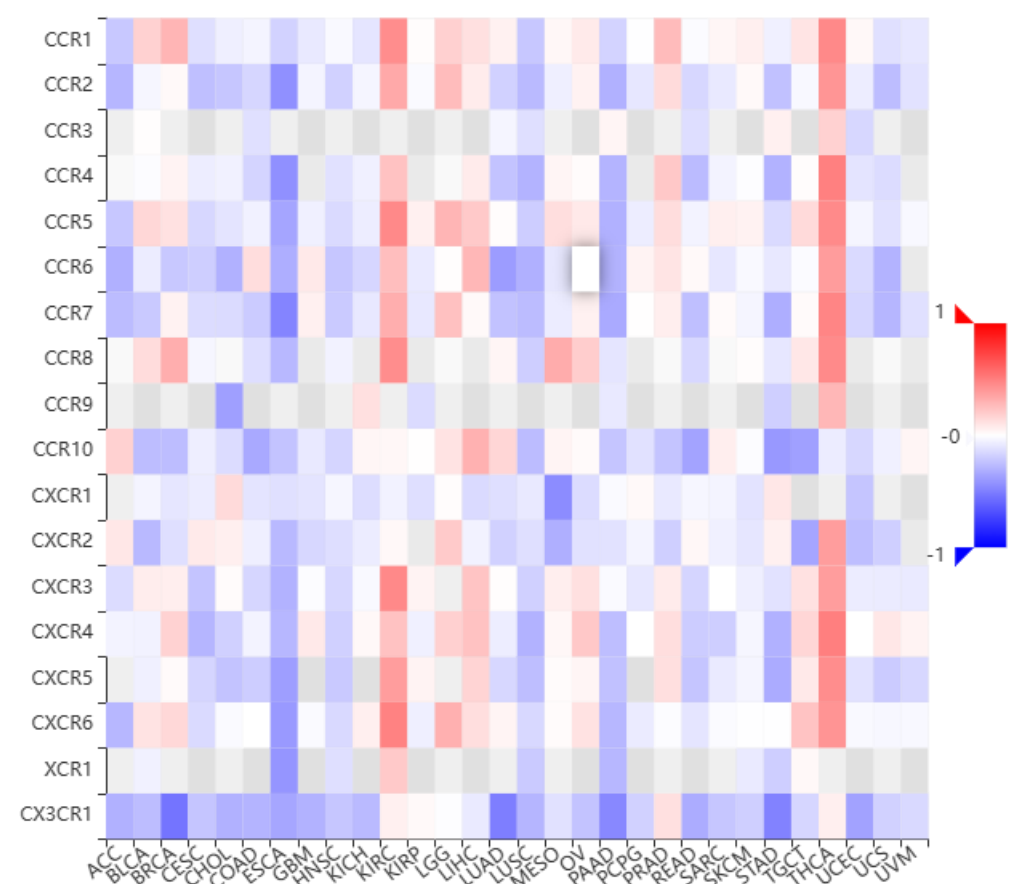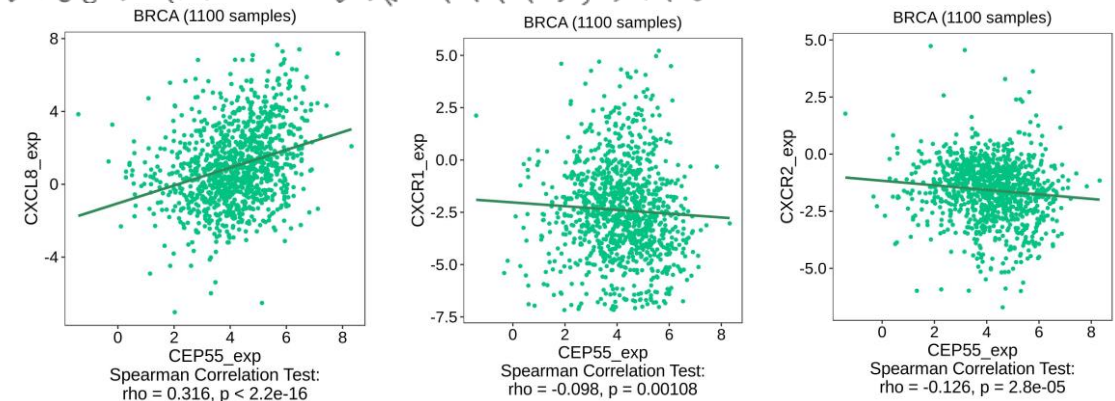

**Fig d:** Relations between chemokines (or receptors) and expression, of CEP55. In this tab, users can examine which chemokines (or receptors) might be regulated by the current gene: **Chemokine** (left); **Receptor** (right). Correlation study show the lowest and the highest chemokines (**CCL14**, AKA: HCC-1 and **CXCL8**, AKA: IL-8 ) and its related receptors correlation with CEP55 expression.

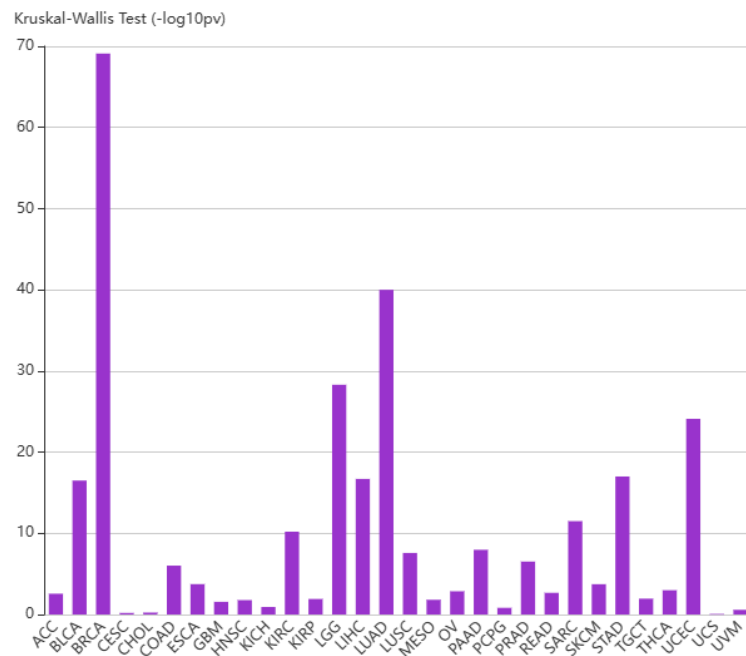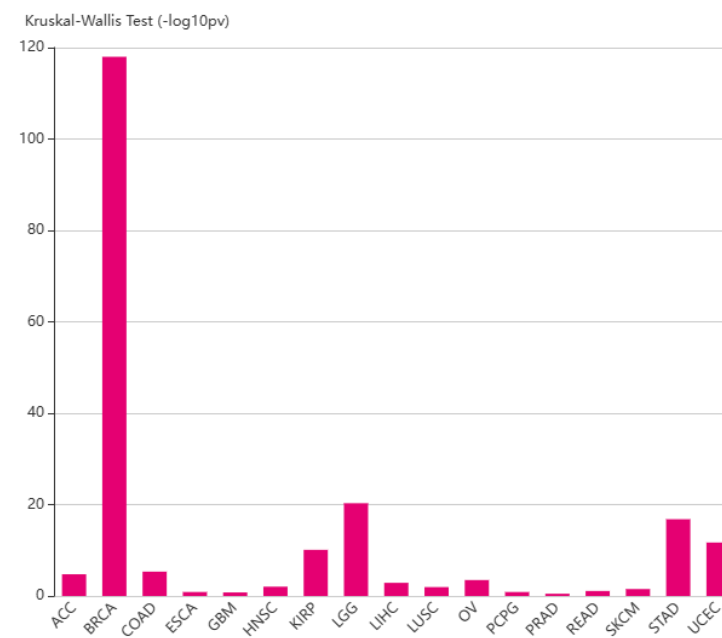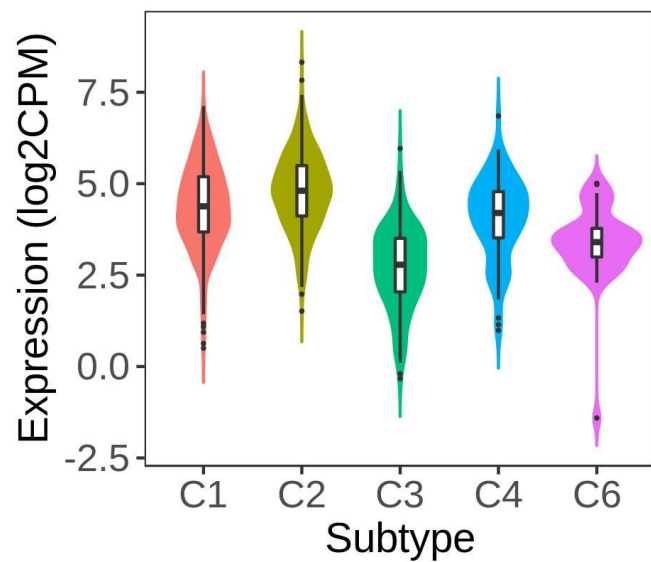

BRCA :: CEP55\_exp  
 Kruskal-Wallis Test:  $Pv=7.97e-70$   
 n=C1 369,C2 390,C3 191,C4 92,C6 40

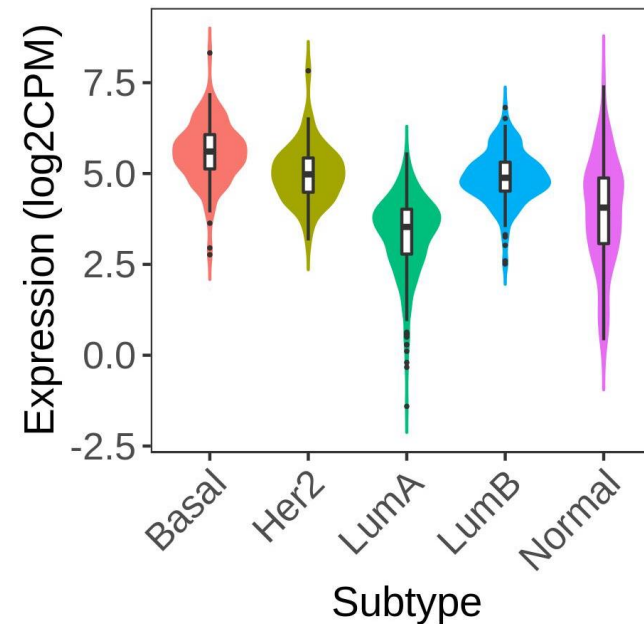

BRCA :: CEP55\_exp  
 Kruskal-Wallis Test:  $Pv=3.39e-119$   
 n=Basal 172,  
 Her2 73,  
 LumA 508,  
 LumB 191,  
 Normal 137

**Fig e:** Distribution of CEP55 expression across immune and molecular subtypes : **Immune subtype:** C1 (wound healing); C2 (IFN-gamma dominant); C3 (inflammatory); C4 (lymphocyte depleted); C5 (immunologically quiet); C6 (TGF-b dominant) and **Molecular subtype**
